# Supplementary material for: Transcriptomic and Metabolomic Profiles Provide Insights into the Red-Stipe Symptom of Morel Fruiting Bodies
Source: MDPI journal article supplement (doi:10.3390/jof9030373), 2023-03-18
Supplement: s1 [file s1]

Supplementary Information

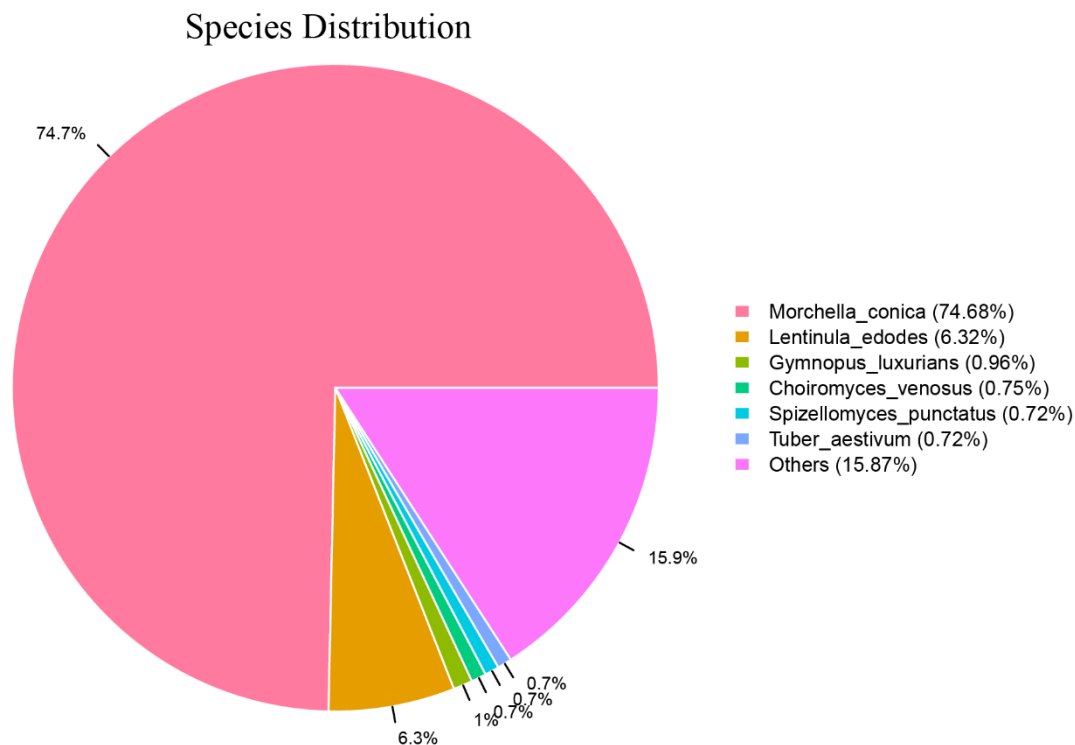

Supplementary Figure S1. Species distribution of NR annotation results of the *Morchella* transcripts.

|                                                                                                       |
|-------------------------------------------------------------------------------------------------------|
| Table S1. Primers for the selected DEGs.                                                              |
| Table S2. Sequencing data Statistics.                                                                 |
| Table S3. Trinity assembly results.                                                                   |
| Table S4. Annotation results of the Unigenes.                                                         |
| Table S5. Gene annotation result using NCBI non-redundant protein database.                           |
| Table S6. Functional annotation of unigenes in the NR, Swiss-prot, Pfam, COG, GO, and KEGG databases. |
| Table S7. All DEGs in red-stipe symptom.                                                              |
| Table S8 GO annotation of DEGs.                                                                       |
| Table S9. GO enrichment of DEGs.                                                                      |
| Table S10. KEGG annotation of DEGs.                                                                   |
| Table S11. KEGG enrichment of DEGs.                                                                   |
| Table S12. Statistics of identified metabolites.                                                      |
| Table S13. All DAMs in red-stipe symptom.                                                             |
| Table S14. KEGG enrichment DAMs.                                                                      |
| Table S15. KEGG pathways enriched both in transcriptomic and metabolomic profiles.                    |
| Table S16. DEGs enriched in the combined analysis of transcriptome and metabolome.                    |
| Table S17. DAMs enriched in the combined analysis of transcriptome and metabolome.                    |
| Table S18. Pathways among two previous studies [29,40] and this study.                                |
| Table S19. Summary of the DEGs in tyrosine metabolism pathway.                                        |
