# Supplementary material for: Transcriptomic and Metabolomic Profiles Provide Insights into the Red-Stipe Symptom of Morel Fruiting Bodies
Source: J Fungi (Basel). 2023 Mar 18;9(3):373. doi: 10.3390/jof9030373 (PMC10058789; doi:10.3390/jof9030373)
Supplement: Supplementary file 1 [file jof-09-00373-s001.zip › Supplementary tables.xlsx]

## Sheet: Table S1
Table S1 Primers for the selected DEGs
Primers	Sequence (5'to3'）
7353-F	CAAGCCTGGAAATCCTCCGT
7353-R	TAAACGCCGCTTACTGCTCG
12464-F	CTGTTTCCGGGCTGTAGAGG
12464-R	TACAACCAGTCAGTCACGGC
14293-F	TTGCAAGCCCAAATGTCACG
14293-R	CCCCACCACATACCCATATCC
693-F	GGGTATGGCAGATCGCATCA
693-R	GTTTTGTGTCACCCGCCTTC
ACT1-F	GTACCCTGGTATTGCCGACC
ACT1-R	GGACGATGGAAGGACCACTC

## Sheet: Table S2
Table S2. Sequencing data Statistics.
Sample	Raw Reads	Raw Bases	Valid Reads	Valid Bases	Valid%	Q20%	Q30%	GC%
N_1	43386084	6.51G	39170270	5.44G	90.28	97.23	92.18	48.08
N_2	43390478	6.51G	40082664	5.56G	92.38	97.29	92.31	48.65
N_3	45372828	6.81G	40648294	5.64G	89.59	97.24	92.22	48.74
R_1	45752796	6.86G	41742140	5.79G	91.23	97.28	92.3	48.62
R_2	44483896	6.67G	40880422	5.68G	91.9	97.3	92.32	48.39
R_3	42305222	6.35G	38888552	5.40G	91.92	97.28	92.32	48.87

## Sheet: Table S3
Table S3. Trinity assembly results.
Index	All	GC%	Min Length	Median Length	Max Length	Total Assembled Bases	N50
Transcript	31189	49.41	201	653	10104	32384518	1720
Gene	22969	49.79	201	562	10104	21662221	1585

## Sheet: Table S4
Table S4. Annotation results of the Unigenes.
DB	Num	Ratio(%)
All	22969	100
GO	10665	46.43
KEGG	7371	32.09
Pfam	10120	44.06
swissprot	8766	38.16
eggNOG	12273	53.43
NR	13285	57.84

## Sheet: Table S5
Table S5 Gene annotation result using NCBI non-redundant protein database
Query	NR_hit	NR_description	NR_species	NR_identity	NR_evalue
TRINITY_DN15450_c0_g1	PIS52966.1	60S ribosomal protein L21-A [[Candida] auris]	[Candida]_auris	60.7	2.2e-41
TRINITY_DN12271_c0_g2	OWB56147.1	hypothetical protein B5S28_g2038 [[Candida] boidinii]	[Candida]_boidinii	44.1	5.9e-28
TRINITY_DN14522_c0_g4	XP_003052319.1	hypothetical protein NECHADRAFT_79370 [[Nectria] haematococca mpVI 77-13-4]	[Nectria]_haematococca	62	1.6e-08
TRINITY_DN11952_c0_g3	SAM02780.1	hypothetical protein [Absidia glauca]	Absidia_glauca	36.6	1.3e-06
TRINITY_DN13277_c0_g4	SAM02688.1	hypothetical protein [Absidia glauca]	Absidia_glauca	59.7	2.3e-15
TRINITY_DN13536_c1_g2	YP_009440957.1	cytochrome c oxidase subunit 1 (mitochondrion) [Absidia glauca]	Absidia_glauca	62.4	1.2e-175
TRINITY_DN13811_c0_g1	SAL98006.1	hypothetical protein [Absidia glauca]	Absidia_glauca	62.6	2.8e-30
TRINITY_DN695_c0_g1	SAM05653.1	hypothetical protein [Absidia glauca]	Absidia_glauca	72.4	5.2e-26
TRINITY_DN1090_c0_g1	ORZ07915.1	putative S-formylglutathione hydrolase [Absidia repens]	Absidia_repens	59.8	5e-39
TRINITY_DN11627_c0_g1	ORZ25776.1	t-SNARE [Absidia repens]	Absidia_repens	34.1	1.3e-10
TRINITY_DN11980_c0_g2	ORZ12237.1	Snf7-domain-containing protein [Absidia repens]	Absidia_repens	66	3.4e-29
TRINITY_DN12474_c0_g1	ORZ04469.1	ClpP/crotonase-like domain-containing protein [Absidia repens]	Absidia_repens	56.9	4.1e-23
TRINITY_DN13052_c0_g1	ORZ09174.1	thioredoxin-like protein [Absidia repens]	Absidia_repens	69.5	7.7e-34
TRINITY_DN14644_c0_g1	ORZ05837.1	endopeptidase [Absidia repens]	Absidia_repens	40	1.2e-84
TRINITY_DN16275_c0_g1	ORZ15612.1	30S ribosomal protein S7e [Absidia repens]	Absidia_repens	58.5	2e-50
TRINITY_DN16556_c0_g1	ORZ22121.1	ubiquitin-conjugating enzyme E2-16 kDa [Absidia repens]	Absidia_repens	82.3	6.6e-71
TRINITY_DN407_c0_g1	ORZ22121.1	ubiquitin-conjugating enzyme E2-16 kDa [Absidia repens]	Absidia_repens	82.3	1.5e-71
TRINITY_DN5918_c0_g1	ORZ22121.1	ubiquitin-conjugating enzyme E2-16 kDa [Absidia repens]	Absidia_repens	81.6	3.6e-70
TRINITY_DN2179_c0_g1	XP_025377387.1	tubulin binding cofactor A [Acaromyces ingoldii]	Acaromyces_ingoldii	54	1.9e-16
TRINITY_DN2592_c0_g1	XP_025377387.1	tubulin binding cofactor A [Acaromyces ingoldii]	Acaromyces_ingoldii	54.8	3.8e-15
TRINITY_DN12532_c0_g2	KXL41535.1	hypothetical protein FE78DRAFT_521116 [Acidomyces richmondensis]	Acidomyces_richmondensis	53.2	4.6e-13
TRINITY_DN14096_c0_g2	KFH46997.1	60S ribosomal protein L21-A-like protein [Acremonium chrysogenum ATCC 11550]	Acremonium_chrysogenum	58.6	2.6e-07
TRINITY_DN4304_c0_g1	XP_006461949.1	hypothetical protein AGABI2DRAFT_193298 [Agaricus bisporus var. bisporus H97]	Agaricus_bisporus	84.5	1.6e-33
TRINITY_DN7167_c0_g1	XP_007331798.1	hypothetical protein AGABI1DRAFT_115110 [Agaricus bisporus var. burnettii JB137-S8]	Agaricus_bisporus	85.9	3.7e-32
TRINITY_DN7504_c0_g1	XP_007331013.1	hypothetical protein AGABI1DRAFT_85974 [Agaricus bisporus var. burnettii JB137-S8]	Agaricus_bisporus	54.1	2.4e-13
TRINITY_DN14214_c0_g3	AAB50391.1	intronic endonuclease (mitochondrion) [Agrocybe aegerita]	Agrocybe_aegerita	63.7	9.6e-66
TRINITY_DN10943_c1_g1	KNE60468.1	CAMK/CAMK1 protein kinase [Allomyces macrogynus ATCC 38327]	Allomyces_macrogynus	53.1	3.2e-30
TRINITY_DN11311_c0_g1	KNE62354.1	60S ribosomal protein L15, variant [Allomyces macrogynus ATCC 38327]	Allomyces_macrogynus	73.5	3.2e-52
TRINITY_DN11415_c0_g1	KNE55015.1	hypothetical protein AMAG_00952 [Allomyces macrogynus ATCC 38327]	Allomyces_macrogynus	65.4	1.4e-21
TRINITY_DN11763_c0_g1	KNE60393.1	hypothetical protein AMAG_05783 [Allomyces macrogynus ATCC 38327]	Allomyces_macrogynus	74.2	6.3e-33
TRINITY_DN11822_c0_g2	KNE67576.1	serine-tRNA ligase [Allomyces macrogynus ATCC 38327]	Allomyces_macrogynus	45.8	7.6e-11
TRINITY_DN11980_c0_g1	KNE63433.1	hypothetical protein AMAG_08562 [Allomyces macrogynus ATCC 38327]	Allomyces_macrogynus	75	8.5e-09
TRINITY_DN12110_c0_g1	KNE67183.1	ADP-ribosylation factor-like protein 1 [Allomyces macrogynus ATCC 38327]	Allomyces_macrogynus	74	5.8e-64
TRINITY_DN12431_c0_g1	KNE63622.1	medium-chain specific acyl-CoA dehydrogenase, mitochondrial [Allomyces macrogynus ATCC 38327]	Allomyces_macrogynus	74.7	7e-76
TRINITY_DN13084_c0_g1	KNE68378.1	ADP-ribosylation factor, variant [Allomyces macrogynus ATCC 38327]	Allomyces_macrogynus	75.9	3.6e-30
TRINITY_DN13313_c0_g1	KNE63604.1	malate dehydrogenase [Allomyces macrogynus ATCC 38327]	Allomyces_macrogynus	61.8	3.8e-106
TRINITY_DN13533_c0_g1	KNE68274.1	40S ribosomal protein S8 [Allomyces macrogynus ATCC 38327]	Allomyces_macrogynus	70.2	3.1e-73
TRINITY_DN13869_c0_g1	KNE57106.1	translation initiation factor SUI1 [Allomyces macrogynus ATCC 38327]	Allomyces_macrogynus	64.6	2.8e-34
TRINITY_DN14173_c1_g2	KNE68216.1	40S ribosomal protein S25 [Allomyces macrogynus ATCC 38327]	Allomyces_macrogynus	71.4	1.4e-26
TRINITY_DN14482_c0_g14	KNE68426.1	calcium-translocating P-type ATPase, SERCA-type [Allomyces macrogynus ATCC 38327]	Allomyces_macrogynus	87.5	1.1e-35
TRINITY_DN14612_c6_g1	KNE67268.1	adenylate kinase [Allomyces macrogynus ATCC 38327]	Allomyces_macrogynus	49.7	1.9e-47
TRINITY_DN14796_c0_g1	KNE63492.1	branched-chain amino acid aminotransferase [Allomyces macrogynus ATCC 38327]	Allomyces_macrogynus	64.2	1e-19
TRINITY_DN14833_c0_g1	KNE55285.1	hypothetical protein AMAG_01195 [Allomyces macrogynus ATCC 38327]	Allomyces_macrogynus	48.1	3.4e-34
TRINITY_DN15322_c0_g1	KNE72513.1	hypothetical protein AMAG_16556 [Allomyces macrogynus ATCC 38327]	Allomyces_macrogynus	28.1	2.3e-43
TRINITY_DN15669_c0_g1	KNE63794.1	40S ribosomal protein S25 [Allomyces macrogynus ATCC 38327]	Allomyces_macrogynus	62.3	2.2e-19
TRINITY_DN2817_c0_g2	KNE64142.1	hypothetical protein AMAG_09195 [Allomyces macrogynus ATCC 38327]	Allomyces_macrogynus	61.5	5.4e-39
TRINITY_DN3092_c0_g1	KNE67125.1	malate dehydrogenase [Allomyces macrogynus ATCC 38327]	Allomyces_macrogynus	55	1.4e-15
TRINITY_DN3917_c0_g1	KNE63960.1	ubiquitin-conjugating enzyme E2 2 [Allomyces macrogynus ATCC 38327]	Allomyces_macrogynus	78.5	2.1e-64
TRINITY_DN6925_c0_g1	KNE63417.1	hypothetical protein AMAG_08547 [Allomyces macrogynus ATCC 38327]	Allomyces_macrogynus	58	2.2e-20
TRINITY_DN7068_c0_g1	KNE63872.1	hypothetical protein AMAG_08936 [Allomyces macrogynus ATCC 38327]	Allomyces_macrogynus	46.2	4.1e-08
TRINITY_DN840_c0_g1	KNE55660.1	hypothetical protein AMAG_01547 [Allomyces macrogynus ATCC 38327]	Allomyces_macrogynus	79.4	1.1e-07
TRINITY_DN11691_c0_g1	XP_018385687.1	ubiquitin-activating enzyme E1 [Alternaria alternata]	Alternaria_alternata	52.9	1.1e-10
TRINITY_DN8913_c0_g1	RYN24533.1	hypothetical protein AA0112_g8950 [Alternaria arborescens]	Alternaria_arborescens	41.1	4.4e-46
TRINITY_DN6890_c0_g1	RYO30698.1	hypothetical protein AG0111_g11818 [Alternaria gaisen]	Alternaria_gaisen	63.5	1.5e-14
TRINITY_DN13486_c1_g2	RII07531.1	hypothetical protein CUC08_Gglean008500 [Alternaria sp. MG1]	Alternaria_sp._MG1	90.5	5.3e-102
TRINITY_DN14534_c0_g6	RYN72664.1	hypothetical protein AA0120_g12736 [Alternaria tenuissima]	Alternaria_tenuissima	39.4	4.4e-53
TRINITY_DN4654_c0_g1	KIL70282.1	hypothetical protein M378DRAFT_117351 [Amanita muscaria Koide BX008]	Amanita_muscaria	37.9	4.4e-07
TRINITY_DN2275_c0_g1	PFH53428.1	hypothetical protein AMATHDRAFT_54443 [Amanita thiersii Skay4041]	Amanita_thiersii	38.7	1.4e-23
TRINITY_DN11607_c0_g1	XP_024724933.1	hypothetical protein M430DRAFT_130910 [Amorphotheca resinae ATCC 22711]	Amorphotheca_resinae	52.6	2.3e-24
TRINITY_DN12421_c0_g1	ACF40606.1	NADH dehydrogenase subunit 2, partial (mitochondrion) [Amorphotheca resinae]	Amorphotheca_resinae	38.7	7.1e-42
TRINITY_DN12421_c0_g2	ACF40606.1	NADH dehydrogenase subunit 2, partial (mitochondrion) [Amorphotheca resinae]	Amorphotheca_resinae	38.4	1.7e-35
TRINITY_DN12421_c0_g3	ACF40606.1	NADH dehydrogenase subunit 2, partial (mitochondrion) [Amorphotheca resinae]	Amorphotheca_resinae	38.1	3.6e-36
TRINITY_DN6313_c0_g1	OIR57624.1	aquaporin-like protein [Amphiamblys sp. WSBS2006]	Amphiamblys_sp._WSBS2006	42.2	9.3e-06
TRINITY_DN10090_c0_g3	ORX86295.1	SRP54-domain-containing protein [Anaeromyces robustus]	Anaeromyces_robustus	73.4	2.1e-32
TRINITY_DN11095_c0_g2	ORX86878.1	26S proteasome subunit P45 [Anaeromyces robustus]	Anaeromyces_robustus	88.9	5.4e-81
TRINITY_DN11267_c0_g1	ORX80210.1	small nuclear ribonucleo protein Sm D2 [Anaeromyces robustus]	Anaeromyces_robustus	84.3	7.2e-32
TRINITY_DN11267_c0_g2	ORX80210.1	small nuclear ribonucleo protein Sm D2 [Anaeromyces robustus]	Anaeromyces_robustus	83.9	8e-46
TRINITY_DN11468_c0_g2	ORX87143.1	LMPX of hagfish [Anaeromyces robustus]	Anaeromyces_robustus	81.5	1.3e-64
TRINITY_DN12055_c0_g2	ORX88028.1	hypothetical protein BCR32DRAFT_262204 [Anaeromyces robustus]	Anaeromyces_robustus	43	6.5e-21
TRINITY_DN12252_c0_g2	ORX83030.1	Annexin [Anaeromyces robustus]	Anaeromyces_robustus	47.1	1.4e-13
TRINITY_DN12692_c0_g1	ORX64559.1	DUF1692-domain-containing protein [Anaeromyces robustus]	Anaeromyces_robustus	62.9	2.8e-19
TRINITY_DN13111_c0_g3	ORX86669.1	rab GTPase activator [Anaeromyces robustus]	Anaeromyces_robustus	59.5	1.1e-17
TRINITY_DN13327_c1_g1	ORX88128.1	hypothetical protein BCR32DRAFT_214768 [Anaeromyces robustus]	Anaeromyces_robustus	66.7	4.9e-17
TRINITY_DN13670_c0_g3	ORX72517.1	T-complex protein 1 [Anaeromyces robustus]	Anaeromyces_robustus	56.5	4.2e-29
TRINITY_DN13940_c0_g1	ORX85654.1	phosphatases II [Anaeromyces robustus]	Anaeromyces_robustus	52.3	1.3e-38
TRINITY_DN14076_c1_g2	ORX84582.1	alpha-beta tubulin [Anaeromyces robustus]	Anaeromyces_robustus	87.7	2.3e-47
TRINITY_DN14277_c0_g1	ORX64745.1	putative 60S ribosomal protein L9 [Anaeromyces robustus]	Anaeromyces_robustus	62.6	7.5e-59
TRINITY_DN14848_c0_g1	ORX76995.1	hypothetical protein BCR32DRAFT_270943 [Anaeromyces robustus]	Anaeromyces_robustus	37.3	4.4e-09
TRINITY_DN201_c0_g1	ORX78718.1	stress-associated endoplasmic reticulum protein-like protein family member 2 [Anaeromyces robustus]	Anaeromyces_robustus	53.1	2.6e-06
TRINITY_DN3509_c0_g2	ORX77908.1	GMP reductase [Anaeromyces robustus]	Anaeromyces_robustus	83	1.8e-41
TRINITY_DN4184_c0_g1	ORX87339.1	hypothetical protein BCR32DRAFT_240327 [Anaeromyces robustus]	Anaeromyces_robustus	41.9	5.1e-07
TRINITY_DN6245_c0_g1	ORX78964.1	hypothetical protein BCR32DRAFT_294722 [Anaeromyces robustus]	Anaeromyces_robustus	47.1	1.2e-09
TRINITY_DN6715_c0_g1	ORX79802.1	hypothetical protein BCR32DRAFT_294192 [Anaeromyces robustus]	Anaeromyces_robustus	63.5	2.7e-16
TRINITY_DN7498_c0_g1	ORX75208.1	macro domain-like protein [Anaeromyces robustus]	Anaeromyces_robustus	56.1	2.9e-14
TRINITY_DN8000_c0_g1	ORX76678.1	williams-Beuren syndrome critical region protein 22 [Anaeromyces robustus]	Anaeromyces_robustus	60.1	1.5e-48
TRINITY_DN11542_c0_g1	KCZ81431.1	iron sulfur cluster assembly protein 1 [Anncaliia algerae PRA339]	Anncaliia_algerae	79.1	2.4e-41
TRINITY_DN14129_c0_g13	AYE67560.1	hypothetical protein, partial (mitochondrion) [Annulohypoxylon stygium]	Annulohypoxylon_stygium	56.4	9.4e-220
TRINITY_DN15951_c0_g1	XP_007880504.1	hypothetical protein PFL1_04785 [Anthracocystis flocculosa PF-1]	Anthracocystis_flocculosa	66.1	9.1e-82
TRINITY_DN5107_c0_g1	XP_007878292.1	hypothetical protein PFL1_02585 [Anthracocystis flocculosa PF-1]	Anthracocystis_flocculosa	56	2.1e-24
TRINITY_DN10799_c0_g1	RSH82645.1	GTP-binding protein of the rab [Apiotrichum porosum]	Apiotrichum_porosum	64.1	7.4e-17
TRINITY_DN10818_c0_g2	RSH86452.1	hypothetical protein EHS24_004708 [Apiotrichum porosum]	Apiotrichum_porosum	43.4	8.6e-15
TRINITY_DN14140_c0_g2	RSH79964.1	hypothetical protein EHS24_009635 [Apiotrichum porosum]	Apiotrichum_porosum	69.7	7.4e-41
TRINITY_DN89_c0_g1	RSH88160.1	60S ribosomal protein L25 [Apiotrichum porosum]	Apiotrichum_porosum	64.5	5.4e-25
TRINITY_DN10364_c0_g1	SJL06816.1	uncharacterized protein ARMOST_10158 [Armillaria ostoyae]	Armillaria_ostoyae	100	4.4e-43
TRINITY_DN14044_c1_g12	SJL06816.1	uncharacterized protein ARMOST_10158 [Armillaria ostoyae]	Armillaria_ostoyae	90	1.1e-50
TRINITY_DN14044_c1_g23	SJL06816.1	uncharacterized protein ARMOST_10158 [Armillaria ostoyae]	Armillaria_ostoyae	100	5e-50
TRINITY_DN14044_c1_g8	SJL06816.1	uncharacterized protein ARMOST_10158 [Armillaria ostoyae]	Armillaria_ostoyae	92.5	3.5e-44
TRINITY_DN14633_c0_g1	SJK98448.1	related to NADP-dependent malic enzyme [Armillaria ostoyae]	Armillaria_ostoyae	43.7	1.1e-67
TRINITY_DN16654_c0_g1	PBK72774.1	hypothetical protein ARMSODRAFT_953175 [Armillaria solidipes]	Armillaria_solidipes	71.7	8.2e-15
TRINITY_DN4542_c0_g1	PBK72522.1	hypothetical protein ARMSODRAFT_910241 [Armillaria solidipes]	Armillaria_solidipes	53.2	1.9e-26
TRINITY_DN9708_c0_g2	PBK78536.1	minichromosome maintenance protein mcm7p [Armillaria solidipes]	Armillaria_solidipes	46.6	4.4e-07
TRINITY_DN11340_c0_g1	XP_011127997.1	hypothetical protein AOL_s00215g493 [Arthrobotrys oligospora ATCC 24927]	Arthrobotrys_oligospora	57.4	4.4e-34
TRINITY_DN14909_c0_g1	XP_011119058.1	hypothetical protein AOL_s00043g269 [Arthrobotrys oligospora ATCC 24927]	Arthrobotrys_oligospora	52.7	8e-11
TRINITY_DN13001_c0_g2	RPA81481.1	hypothetical protein BJ508DRAFT_376395 [Ascobolus immersus RN42]	Ascobolus_immersus	49.3	7.7e-13
TRINITY_DN13987_c0_g21	RPA75388.1	hypothetical protein BJ508DRAFT_418179 [Ascobolus immersus RN42]	Ascobolus_immersus	59.7	4e-39
TRINITY_DN14450_c1_g13	RPA74272.1	methionine aminopeptidase [Ascobolus immersus RN42]	Ascobolus_immersus	75	2e-13
TRINITY_DN14611_c2_g3	RPA82246.1	SGT1-domain-containing protein [Ascobolus immersus RN42]	Ascobolus_immersus	58.8	2.4e-47
TRINITY_DN14793_c0_g1	RPA72451.1	hypothetical protein BJ508DRAFT_217003 [Ascobolus immersus RN42]	Ascobolus_immersus	74	1.6e-18
TRINITY_DN16363_c0_g1	RPA86351.1	hypothetical protein BJ508DRAFT_411511 [Ascobolus immersus RN42]	Ascobolus_immersus	49.1	3e-20
TRINITY_DN3818_c0_g1	RPA78947.1	60S ribosomal protein L44 [Ascobolus immersus RN42]	Ascobolus_immersus	99	1e-52
TRINITY_DN5606_c0_g1	RPA75519.1	hypothetical protein BJ508DRAFT_418094 [Ascobolus immersus RN42]	Ascobolus_immersus	86.4	8.3e-67
TRINITY_DN701_c0_g1	RPA71612.1	MFS general substrate transporter [Ascobolus immersus RN42]	Ascobolus_immersus	33.5	3.2e-66
TRINITY_DN9651_c0_g1	RPA87049.1	cytochrome c oxidase, subunit VIb [Ascobolus immersus RN42]	Ascobolus_immersus	52.3	3.8e-22
TRINITY_DN12953_c0_g1	KZM27666.1	hypothetical protein ST47_g1262 [Ascochyta rabiei]	Ascochyta_rabiei	75.3	1.5e-24
TRINITY_DN14550_c0_g3	KZM25679.1	GTPase [Ascochyta rabiei]	Ascochyta_rabiei	66.5	1.9e-63
TRINITY_DN7256_c0_g1	KZM27588.1	hypothetical protein ST47_g1116 [Ascochyta rabiei]	Ascochyta_rabiei	72.6	7.7e-24
TRINITY_DN6027_c0_g2	XP_020050822.1	subunit of the RNA polymerase II mediator complex [Ascoidea rubescens DSM 1968]	Ascoidea_rubescens	39.5	1.9e-15
TRINITY_DN11507_c0_g1	KZZ96383.1	Translation initiation factor 1A (eIF-1A) [Ascosphaera apis ARSEF 7405]	Ascosphaera_apis	79.5	2.8e-42
TRINITY_DN11507_c0_g2	KZZ96383.1	Translation initiation factor 1A (eIF-1A) [Ascosphaera apis ARSEF 7405]	Ascosphaera_apis	88.1	5.2e-27
TRINITY_DN14547_c0_g1	CEL01381.1	Putative Phosphomethylpyrimidine kinase [Aspergillus calidoustus]	Aspergillus_calidoustus	64.8	7.3e-175
TRINITY_DN12296_c0_g1	XP_024690188.1	hypothetical protein P168DRAFT_329542 [Aspergillus campestris IBT 28561]	Aspergillus_campestris	83.8	5.7e-43
TRINITY_DN14120_c2_g1	XP_024675302.1	NAD(P)-binding protein [Aspergillus candidus]	Aspergillus_candidus	40.5	1e-10
TRINITY_DN14132_c0_g1	XP_024674868.1	ankyrin repeat-containing domain protein [Aspergillus candidus]	Aspergillus_candidus	37.7	2e-07
TRINITY_DN1589_c0_g1	XP_024672405.1	hypothetical protein BDW47DRAFT_28738 [Aspergillus candidus]	Aspergillus_candidus	57	9.2e-18
TRINITY_DN13489_c0_g2	OOG01030.1	hypothetical protein ASPCADRAFT_202887 [Aspergillus carbonarius ITEM 5010]	Aspergillus_carbonarius	79.1	1.2e-33
TRINITY_DN14312_c1_g5	ODM19446.1	hypothetical protein SI65_04430 [Aspergillus cristatus]	Aspergillus_cristatus	37.7	3.5e-28
TRINITY_DN4560_c0_g1	ODM22763.1	hypothetical protein SI65_00352 [Aspergillus cristatus]	Aspergillus_cristatus	55.2	7.6e-11
TRINITY_DN10386_c0_g1	XP_001264963.1	glutathione S-transferase, putative [Aspergillus fischeri NRRL 181]	Aspergillus_fischeri	46.5	7.2e-07
TRINITY_DN13424_c0_g2	XP_747470.1	annexin ANXC3.1 [Aspergillus fumigatus Af293]	Aspergillus_fumigatus	38.6	1.1e-12
TRINITY_DN5747_c0_g1	XP_751201.1	60S ribosomal protein L31e [Aspergillus fumigatus Af293]	Aspergillus_fumigatus	68.2	1e-25
TRINITY_DN14429_c0_g1	XP_025396068.1	eukaryotic type KH-domain (KH-domain type I) [Aspergillus heteromorphus CBS 117.55]	Aspergillus_heteromorphus	26.6	6.3e-22
TRINITY_DN16214_c0_g1	XP_025400641.1	hypothetical protein BO70DRAFT_395213 [Aspergillus heteromorphus CBS 117.55]	Aspergillus_heteromorphus	59.7	1.4e-14
TRINITY_DN15337_c0_g1	XP_025578861.1	oxidoreductase [Aspergillus ibericus CBS 121593]	Aspergillus_ibericus	32	2.2e-27
TRINITY_DN13172_c0_g1	XP_025529010.1	60S ribosomal protein L37 [Aspergillus japonicus CBS 114.51]	Aspergillus_japonicus	68.4	4.5e-30
TRINITY_DN14116_c0_g2	GAQ07679.1	60S ribosomal protein L7 [Aspergillus lentulus]	Aspergillus_lentulus	70.8	4.9e-75
TRINITY_DN915_c0_g2	XP_026604641.1	hypothetical protein DSM5745_05145 [Aspergillus mulundensis]	Aspergillus_mulundensis	29.7	9.8e-06
TRINITY_DN14553_c2_g1	KKK21459.1	hypothetical protein AOCH_007725 [Aspergillus ochraceoroseus]	Aspergillus_ochraceoroseus	89.3	2e-06
TRINITY_DN14116_c0_g1	XP_001825987.1	60S ribosomal protein L7 [Aspergillus oryzae RIB40]	Aspergillus_oryzae	68	2.1e-74
TRINITY_DN14438_c0_g3	KJK61165.1	ANK ankyrin repeat protein [Aspergillus parasiticus SU-1]	Aspergillus_parasiticus	33.6	1.4e-06
TRINITY_DN14410_c0_g5	XP_001212663.1	predicted protein [Aspergillus terreus NIH2624]	Aspergillus_terreus	39.1	9.8e-11
TRINITY_DN11246_c0_g2	XP_026619115.1	hypothetical protein CDV56_109695 [Aspergillus thermomutatus]	Aspergillus_thermomutatus	23.9	1.9e-07
TRINITY_DN14437_c1_g16	XP_026615255.1	hypothetical protein CDV56_106206 [Aspergillus thermomutatus]	Aspergillus_thermomutatus	77.2	3.7e-103
TRINITY_DN16089_c0_g1	XP_026611469.1	hypothetical protein CDV56_102742 [Aspergillus thermomutatus]	Aspergillus_thermomutatus	65.8	7.2e-24
TRINITY_DN8077_c0_g2	XP_026611448.1	hypothetical protein CDV56_100940 [Aspergillus thermomutatus]	Aspergillus_thermomutatus	64.1	1.1e-13
TRINITY_DN10321_c0_g1	RLL93055.1	hypothetical protein CFD26_100455 [Aspergillus turcosus]	Aspergillus_turcosus	39	5.2e-07
TRINITY_DN12076_c0_g1	XP_025568276.1	nucleotide-diphospho-sugar transferase [Aspergillus vadensis CBS 113365]	Aspergillus_vadensis	34.5	3.9e-08
TRINITY_DN13721_c0_g2	PYI15502.1	hypothetical protein BO99DRAFT_250609 [Aspergillus violaceofuscus CBS 115571]	Aspergillus_violaceofuscus	59	5.1e-07
TRINITY_DN8752_c0_g1	XP_026620475.1	hypothetical protein BDQ94DRAFT_184598 [Aspergillus welwitschiae]	Aspergillus_welwitschiae	47.2	3.2e-14
TRINITY_DN16620_c0_g1	KEQ64255.1	putative alpha/beta hydrolase [Aureobasidium melanogenum CBS 110374]	Aureobasidium_melanogenum	23.6	4.7e-10
TRINITY_DN8470_c0_g1	KEQ59964.1	glia maturation factor beta [Aureobasidium melanogenum CBS 110374]	Aureobasidium_melanogenum	72.3	1.5e-40
TRINITY_DN14122_c0_g9	KEQ85936.1	hypothetical protein M438DRAFT_270693, partial [Aureobasidium pullulans EXF-150]	Aureobasidium_pullulans	61.7	3.9e-06
TRINITY_DN4503_c0_g1	KEQ88390.1	glycine cleavage system H protein [Aureobasidium pullulans EXF-150]	Aureobasidium_pullulans	50.3	3.5e-34
TRINITY_DN9651_c0_g2	EJD49011.1	cytochrome c oxidase, subunit VIb [Auricularia subglabra TFB-10046 SS5]	Auricularia_subglabra	59.5	2.7e-22
TRINITY_DN10654_c0_g1	ORY05204.1	binding protein-like protein [Basidiobolus meristosporus CBS 931.73]	Basidiobolus_meristosporus	50	5.5e-13
TRINITY_DN1085_c0_g1	ORX85490.1	hypothetical protein K493DRAFT_291524 [Basidiobolus meristosporus CBS 931.73]	Basidiobolus_meristosporus	62.5	3.3e-25
TRINITY_DN1090_c0_g2	ORX90743.1	s-formylglutathione hydrolase [Basidiobolus meristosporus CBS 931.73]	Basidiobolus_meristosporus	64.1	4.7e-61
TRINITY_DN1100_c0_g1	ORX89438.1	40S ribosomal protein S17-A [Basidiobolus meristosporus CBS 931.73]	Basidiobolus_meristosporus	69.2	4.7e-38
TRINITY_DN11044_c1_g2	ORX98650.1	manganese and iron superoxide dismutase [Basidiobolus meristosporus CBS 931.73]	Basidiobolus_meristosporus	68.1	1.4e-30
TRINITY_DN11071_c0_g1	ORY07831.1	Mov34-domain-containing protein [Basidiobolus meristosporus CBS 931.73]	Basidiobolus_meristosporus	44.9	7.2e-61
TRINITY_DN11210_c0_g1	ORX75111.1	ARM repeat-containing protein [Basidiobolus meristosporus CBS 931.73]	Basidiobolus_meristosporus	37.2	1.3e-09
TRINITY_DN11342_c0_g1	ORX94691.1	hypothetical protein K493DRAFT_261230 [Basidiobolus meristosporus CBS 931.73]	Basidiobolus_meristosporus	73.8	7.6e-31
TRINITY_DN11343_c0_g1	ORX91440.1	DNA damage-binding protein 1-like protein [Basidiobolus meristosporus CBS 931.73]	Basidiobolus_meristosporus	47	4e-14
TRINITY_DN11414_c0_g1	ORX81263.1	Sm-like ribonucleo protein [Basidiobolus meristosporus CBS 931.73]	Basidiobolus_meristosporus	76.2	1.6e-30
TRINITY_DN11763_c0_g2	ORY02020.1	Dehydrogenase, E1 component [Basidiobolus meristosporus CBS 931.73]	Basidiobolus_meristosporus	76.5	2.5e-21
TRINITY_DN11790_c0_g2	ORX98142.1	hypothetical protein K493DRAFT_406676 [Basidiobolus meristosporus CBS 931.73]	Basidiobolus_meristosporus	66.2	3.5e-14
TRINITY_DN11804_c0_g1	ORX92102.1	peroxiredoxin [Basidiobolus meristosporus CBS 931.73]	Basidiobolus_meristosporus	72.2	1.6e-30
TRINITY_DN11918_c0_g1	ORX91382.1	ribosomal protein L18e [Basidiobolus meristosporus CBS 931.73]	Basidiobolus_meristosporus	68.9	2.1e-59
TRINITY_DN11918_c0_g2	ORX91382.1	ribosomal protein L18e [Basidiobolus meristosporus CBS 931.73]	Basidiobolus_meristosporus	70.6	6.8e-64
TRINITY_DN11924_c0_g1	ORX93437.1	26S proteasome non-ATPase regulatory subunit 14 [Basidiobolus meristosporus CBS 931.73]	Basidiobolus_meristosporus	89.3	5.1e-31
TRINITY_DN12129_c0_g1	ORX89039.1	L30e-like protein [Basidiobolus meristosporus CBS 931.73]	Basidiobolus_meristosporus	62	6.9e-10
TRINITY_DN12448_c1_g1	ORX96190.1	Cullin-domain-containing protein [Basidiobolus meristosporus CBS 931.73]	Basidiobolus_meristosporus	66	5.2e-28
TRINITY_DN12608_c0_g2	ORX85623.1	olygosaccharyltransferase alpha subunit [Basidiobolus meristosporus CBS 931.73]	Basidiobolus_meristosporus	44.2	2.3e-10
TRINITY_DN12608_c0_g3	ORX85623.1	olygosaccharyltransferase alpha subunit [Basidiobolus meristosporus CBS 931.73]	Basidiobolus_meristosporus	41.4	3.2e-16
TRINITY_DN12716_c0_g1	ORX98631.1	glutathione S-transferase [Basidiobolus meristosporus CBS 931.73]	Basidiobolus_meristosporus	37.3	5.1e-26
TRINITY_DN12759_c0_g1	ORX93056.1	hypothetical protein K493DRAFT_316228 [Basidiobolus meristosporus CBS 931.73]	Basidiobolus_meristosporus	70	1.8e-28
TRINITY_DN12759_c0_g2	ORX93056.1	hypothetical protein K493DRAFT_316228 [Basidiobolus meristosporus CBS 931.73]	Basidiobolus_meristosporus	59.9	3.8e-36
TRINITY_DN12759_c0_g3	ORX93056.1	hypothetical protein K493DRAFT_316228 [Basidiobolus meristosporus CBS 931.73]	Basidiobolus_meristosporus	59.7	1.8e-36
TRINITY_DN12788_c0_g1	ORX89824.1	hypothetical protein K493DRAFT_357633 [Basidiobolus meristosporus CBS 931.73]	Basidiobolus_meristosporus	41.7	3.1e-53
TRINITY_DN12819_c1_g1	ORX97825.1	Coatomer, alpha subunit [Basidiobolus meristosporus CBS 931.73]	Basidiobolus_meristosporus	33.7	3.8e-06
TRINITY_DN12873_c0_g2	ORX94193.1	ATP synthase F1, gamma subunit [Basidiobolus meristosporus CBS 931.73]	Basidiobolus_meristosporus	46	1.6e-57
TRINITY_DN12980_c0_g2	ORX82232.1	isocitrate dehydrogenase 1 [Basidiobolus meristosporus CBS 931.73]	Basidiobolus_meristosporus	75.6	2e-28
TRINITY_DN13003_c0_g1	ORX84405.1	3-hydroxyisobutyrate dehydrogenase [Basidiobolus meristosporus CBS 931.73]	Basidiobolus_meristosporus	52.3	2.8e-19
TRINITY_DN1305_c0_g1	ORY03623.1	60S ribosomal protein L16 [Basidiobolus meristosporus CBS 931.73]	Basidiobolus_meristosporus	59.4	1.2e-59
TRINITY_DN13110_c0_g1	ORX65504.1	ribosomal protein 60S [Basidiobolus meristosporus CBS 931.73]	Basidiobolus_meristosporus	68.6	3e-19
TRINITY_DN13110_c0_g2	ORX65504.1	ribosomal protein 60S [Basidiobolus meristosporus CBS 931.73]	Basidiobolus_meristosporus	68.6	6.8e-19
TRINITY_DN13111_c0_g1	ORY03718.1	rab GTPase activator [Basidiobolus meristosporus CBS 931.73]	Basidiobolus_meristosporus	61.8	2.8e-43
TRINITY_DN13113_c0_g4	ORY00195.1	RNI-like protein [Basidiobolus meristosporus CBS 931.73]	Basidiobolus_meristosporus	23.1	1.1e-07
TRINITY_DN13263_c0_g1	ORY02325.1	ras-2 [Basidiobolus meristosporus CBS 931.73]	Basidiobolus_meristosporus	62	1.1e-38
TRINITY_DN13346_c0_g1	ORX93883.1	proteasome-domain-containing protein [Basidiobolus meristosporus CBS 931.73]	Basidiobolus_meristosporus	55.9	8.1e-55
TRINITY_DN13599_c0_g1	ORX92378.1	60S ribosomal protein L22 [Basidiobolus meristosporus CBS 931.73]	Basidiobolus_meristosporus	58.9	2.4e-22
TRINITY_DN13670_c0_g1	ORX88529.1	T-complex protein 1 [Basidiobolus meristosporus CBS 931.73]	Basidiobolus_meristosporus	50.9	1.7e-42
TRINITY_DN13674_c0_g1	ORX90233.1	50S ribosomal protein L13e [Basidiobolus meristosporus CBS 931.73]	Basidiobolus_meristosporus	62.1	6.5e-61
TRINITY_DN13745_c0_g1	ORX80535.1	RNA-binding domain-containing protein [Basidiobolus meristosporus CBS 931.73]	Basidiobolus_meristosporus	54.1	2e-44
TRINITY_DN13792_c0_g2	ORX98161.1	hypothetical protein K493DRAFT_280708 [Basidiobolus meristosporus CBS 931.73]	Basidiobolus_meristosporus	31.5	4.9e-06
TRINITY_DN13803_c0_g2	ORY00427.1	hypothetical protein K493DRAFT_103679 [Basidiobolus meristosporus CBS 931.73]	Basidiobolus_meristosporus	22.6	3.1e-06
TRINITY_DN13859_c0_g1	ORX88465.1	60S ribosomal protein L16 [Basidiobolus meristosporus CBS 931.73]	Basidiobolus_meristosporus	61.7	4.7e-64
TRINITY_DN13859_c0_g2	ORX88465.1	60S ribosomal protein L16 [Basidiobolus meristosporus CBS 931.73]	Basidiobolus_meristosporus	60.7	2.4e-64
TRINITY_DN13904_c0_g1	ORX90006.1	60S ribosomal protein L11 [Basidiobolus meristosporus CBS 931.73]	Basidiobolus_meristosporus	83.1	4.3e-76
TRINITY_DN13995_c0_g1	ORY01480.1	MRG-domain-containing protein [Basidiobolus meristosporus CBS 931.73]	Basidiobolus_meristosporus	45.5	4e-32
TRINITY_DN14113_c0_g1	ORX99004.1	hypothetical protein K493DRAFT_313414 [Basidiobolus meristosporus CBS 931.73]	Basidiobolus_meristosporus	67	4e-33
TRINITY_DN14145_c0_g1	ORX91885.1	Calreticulin [Basidiobolus meristosporus CBS 931.73]	Basidiobolus_meristosporus	66	9.6e-71
TRINITY_DN14226_c1_g1	ORY00427.1	hypothetical protein K493DRAFT_103679 [Basidiobolus meristosporus CBS 931.73]	Basidiobolus_meristosporus	40.3	2.5e-90
TRINITY_DN14227_c0_g2	ORX93138.1	F-actin capping protein, beta subunit [Basidiobolus meristosporus CBS 931.73]	Basidiobolus_meristosporus	65.9	2.3e-97
TRINITY_DN14281_c1_g1	ORY08281.1	cyclophilin A [Basidiobolus meristosporus CBS 931.73]	Basidiobolus_meristosporus	76.8	6e-72
TRINITY_DN14364_c0_g1	ORX98470.1	ferritin-like protein [Basidiobolus meristosporus CBS 931.73]	Basidiobolus_meristosporus	43.9	8.9e-36
TRINITY_DN14364_c0_g3	ORX98470.1	ferritin-like protein [Basidiobolus meristosporus CBS 931.73]	Basidiobolus_meristosporus	47.1	5.9e-37
TRINITY_DN14369_c0_g1	ORX78907.1	ATP synthase subunit beta [Basidiobolus meristosporus CBS 931.73]	Basidiobolus_meristosporus	81.4	6.4e-219
TRINITY_DN14433_c0_g1	ORX97772.1	hypothetical protein K493DRAFT_215367 [Basidiobolus meristosporus CBS 931.73]	Basidiobolus_meristosporus	38.2	1.5e-48
TRINITY_DN14433_c0_g2	ORX97772.1	hypothetical protein K493DRAFT_215367 [Basidiobolus meristosporus CBS 931.73]	Basidiobolus_meristosporus	32	1.4e-17
TRINITY_DN14433_c0_g3	ORX97772.1	hypothetical protein K493DRAFT_215367 [Basidiobolus meristosporus CBS 931.73]	Basidiobolus_meristosporus	48.3	1.1e-20
TRINITY_DN14441_c0_g1	ORY05024.1	ferritin-like protein [Basidiobolus meristosporus CBS 931.73]	Basidiobolus_meristosporus	51.7	8.9e-43
TRINITY_DN14441_c0_g2	ORX98470.1	ferritin-like protein [Basidiobolus meristosporus CBS 931.73]	Basidiobolus_meristosporus	53.5	3.3e-43
TRINITY_DN14503_c2_g13	ORX88726.1	signal recognition particle 14kDa [Basidiobolus meristosporus CBS 931.73]	Basidiobolus_meristosporus	41.2	4.1e-12
TRINITY_DN14550_c0_g1	ORX93479.1	P-loop containing nucleoside triphosphate hydrolase protein [Basidiobolus meristosporus CBS 931.73]	Basidiobolus_meristosporus	71.1	0
TRINITY_DN14612_c6_g5	ORY01523.1	catalase [Basidiobolus meristosporus CBS 931.73]	Basidiobolus_meristosporus	45.2	2.6e-112
TRINITY_DN15415_c0_g1	ORX91442.1	ribosomal protein S6e [Basidiobolus meristosporus CBS 931.73]	Basidiobolus_meristosporus	63.6	4e-76
TRINITY_DN15584_c0_g1	ORX98470.1	ferritin-like protein [Basidiobolus meristosporus CBS 931.73]	Basidiobolus_meristosporus	54.2	8.4e-44
TRINITY_DN15825_c0_g1	ORX77515.1	adenine nucleotide alpha hydrolases-like protein [Basidiobolus meristosporus CBS 931.73]	Basidiobolus_meristosporus	36.9	3.4e-15
TRINITY_DN15914_c0_g1	ORX87428.1	Sm protein F-like protein [Basidiobolus meristosporus CBS 931.73]	Basidiobolus_meristosporus	86.5	1.3e-30
TRINITY_DN16359_c0_g1	ORY08002.1	60S ribosomal protein L11 [Basidiobolus meristosporus CBS 931.73]	Basidiobolus_meristosporus	75	7.1e-72
TRINITY_DN2767_c0_g1	ORY03362.1	EF-hand [Basidiobolus meristosporus CBS 931.73]	Basidiobolus_meristosporus	42.9	1.6e-35
TRINITY_DN3025_c0_g1	ORX90006.1	60S ribosomal protein L11 [Basidiobolus meristosporus CBS 931.73]	Basidiobolus_meristosporus	79.2	1.5e-73
TRINITY_DN3700_c0_g1	ORY00700.1	60S ribosomal protein L19 [Basidiobolus meristosporus CBS 931.73]	Basidiobolus_meristosporus	73.3	9.9e-62
TRINITY_DN389_c0_g2	ORX98978.1	hypothetical protein K493DRAFT_299618 [Basidiobolus meristosporus CBS 931.73]	Basidiobolus_meristosporus	56.2	2.9e-32
TRINITY_DN4426_c0_g1	ORX78175.1	1,2-dihydroxy-3-keto-5-methylthiopentene dioxygenase-like protein [Basidiobolus meristosporus CBS 931.73]	Basidiobolus_meristosporus	63.8	6.1e-37
TRINITY_DN4946_c0_g1	ORY00198.1	hypothetical protein K493DRAFT_348021 [Basidiobolus meristosporus CBS 931.73]	Basidiobolus_meristosporus	35.9	1.4e-39
TRINITY_DN5027_c0_g1	ORX87181.1	40S ribosomal protein S20-like protein [Basidiobolus meristosporus CBS 931.73]	Basidiobolus_meristosporus	74.6	4.1e-42
TRINITY_DN5220_c0_g2	ORX95861.1	V-type proton ATPase proteolipid subunit [Basidiobolus meristosporus CBS 931.73]	Basidiobolus_meristosporus	81.5	1.2e-14
TRINITY_DN5235_c0_g1	ORY08245.1	delta-12 fatty acid desaturase [Basidiobolus meristosporus CBS 931.73]	Basidiobolus_meristosporus	47.2	1.7e-95
TRINITY_DN5247_c0_g1	ORY06191.1	hypothetical protein K493DRAFT_252149 [Basidiobolus meristosporus CBS 931.73]	Basidiobolus_meristosporus	46.5	1e-11
TRINITY_DN6004_c0_g1	ORX91382.1	ribosomal protein L18e [Basidiobolus meristosporus CBS 931.73]	Basidiobolus_meristosporus	76.6	1.7e-64
TRINITY_DN637_c0_g1	ORY00529.1	ribosomal protein L24 [Basidiobolus meristosporus CBS 931.73]	Basidiobolus_meristosporus	70.5	1.8e-45
TRINITY_DN6464_c0_g2	ORX99592.1	signal recognition particle protein [Basidiobolus meristosporus CBS 931.73]	Basidiobolus_meristosporus	57.5	7.3e-29
TRINITY_DN6677_c0_g2	ORY07441.1	eukaryotic translation initiation factor 4E [Basidiobolus meristosporus CBS 931.73]	Basidiobolus_meristosporus	60.4	1e-27
TRINITY_DN7351_c0_g1	ORX80535.1	RNA-binding domain-containing protein [Basidiobolus meristosporus CBS 931.73]	Basidiobolus_meristosporus	57.7	7.1e-15
TRINITY_DN7571_c0_g1	ORY01231.1	PCI-domain-containing protein [Basidiobolus meristosporus CBS 931.73]	Basidiobolus_meristosporus	63.1	2.5e-23
TRINITY_DN7840_c0_g1	ORX90378.1	N-terminal nucleophile aminohydrolase [Basidiobolus meristosporus CBS 931.73]	Basidiobolus_meristosporus	66.3	8.1e-86
TRINITY_DN7930_c0_g3	ORX97422.1	Piwi-domain-containing protein [Basidiobolus meristosporus CBS 931.73]	Basidiobolus_meristosporus	50.5	6.4e-15
TRINITY_DN8391_c0_g1	ORX95861.1	V-type proton ATPase proteolipid subunit [Basidiobolus meristosporus CBS 931.73]	Basidiobolus_meristosporus	57.9	2.4e-27
TRINITY_DN8407_c0_g1	ORY03101.1	RNA-binding domain-containing protein [Basidiobolus meristosporus CBS 931.73]	Basidiobolus_meristosporus	54.4	1e-18
TRINITY_DN8497_c0_g1	ORX91964.1	hydroxymethylglutaryl-CoA synthase [Basidiobolus meristosporus CBS 931.73]	Basidiobolus_meristosporus	45.7	2.4e-06
TRINITY_DN8568_c0_g2	ORX95990.1	S-adenosylmethionine synthase [Basidiobolus meristosporus CBS 931.73]	Basidiobolus_meristosporus	67.5	7.7e-84
TRINITY_DN8871_c0_g1	ORY05119.1	AAA-domain-containing protein [Basidiobolus meristosporus CBS 931.73]	Basidiobolus_meristosporus	44.7	3.2e-31
TRINITY_DN8929_c0_g1	ORX91157.1	DNA polymerase delta processivity factor [Basidiobolus meristosporus CBS 931.73]	Basidiobolus_meristosporus	67.2	4.1e-16
TRINITY_DN9527_c0_g3	ORX82899.1	proteasome 26S subunit [Basidiobolus meristosporus CBS 931.73]	Basidiobolus_meristosporus	56.4	4.9e-26
TRINITY_DN10603_c0_g1	OAJ38377.1	hypothetical protein, variant [Batrachochytrium dendrobatidis JEL423]	Batrachochytrium_dendrobatidis	64	2.6e-22
TRINITY_DN10784_c0_g1	OAJ45220.1	hypothetical protein BDEG_28378 [Batrachochytrium dendrobatidis JEL423]	Batrachochytrium_dendrobatidis	76.8	5e-18
TRINITY_DN11094_c0_g2	XP_006683402.1	hypothetical protein BATDEDRAFT_15114 [Batrachochytrium dendrobatidis JAM81]	Batrachochytrium_dendrobatidis	33.1	9.6e-10
TRINITY_DN11288_c0_g2	XP_006683402.1	hypothetical protein BATDEDRAFT_15114 [Batrachochytrium dendrobatidis JAM81]	Batrachochytrium_dendrobatidis	43	3.1e-69
TRINITY_DN11545_c0_g1	XP_006680755.1	hypothetical protein BATDEDRAFT_30413 [Batrachochytrium dendrobatidis JAM81]	Batrachochytrium_dendrobatidis	83.2	2.2e-53
TRINITY_DN11886_c0_g1	XP_006675832.1	tubulin, alpha, ubiquitous [Batrachochytrium dendrobatidis JAM81]	Batrachochytrium_dendrobatidis	84.4	5.9e-235
TRINITY_DN13054_c0_g1	XP_006677258.1	hypothetical protein BATDEDRAFT_23334 [Batrachochytrium dendrobatidis JAM81]	Batrachochytrium_dendrobatidis	63.6	5.3e-16
TRINITY_DN13243_c0_g1	XP_006678226.1	hypothetical protein BATDEDRAFT_87457 [Batrachochytrium dendrobatidis JAM81]	Batrachochytrium_dendrobatidis	44.2	7e-12
TRINITY_DN13302_c0_g1	OAJ39585.1	hypothetical protein BDEG_23418 [Batrachochytrium dendrobatidis JEL423]	Batrachochytrium_dendrobatidis	41.2	2.9e-08
TRINITY_DN13593_c0_g2	OAJ39349.1	U6 snRNA-associated Sm-like protein LSm5 [Batrachochytrium dendrobatidis JEL423]	Batrachochytrium_dendrobatidis	47.7	1.2e-43
TRINITY_DN13655_c0_g2	XP_006674986.1	hypothetical protein BATDEDRAFT_8283, partial [Batrachochytrium dendrobatidis JAM81]	Batrachochytrium_dendrobatidis	59	4.4e-32
TRINITY_DN14016_c0_g2	XP_006677258.1	hypothetical protein BATDEDRAFT_23334 [Batrachochytrium dendrobatidis JAM81]	Batrachochytrium_dendrobatidis	55.4	2.2e-09
TRINITY_DN14232_c1_g15	OAJ41170.1	hypothetical protein BDEG_24810 [Batrachochytrium dendrobatidis JEL423]	Batrachochytrium_dendrobatidis	36	4.8e-07
TRINITY_DN14239_c1_g13	OAJ38677.1	hypothetical protein BDEG_22585 [Batrachochytrium dendrobatidis JEL423]	Batrachochytrium_dendrobatidis	42.4	1.3e-06
TRINITY_DN14270_c1_g2	XP_006680652.1	hypothetical protein BATDEDRAFT_20311 [Batrachochytrium dendrobatidis JAM81]	Batrachochytrium_dendrobatidis	62	6.9e-28
TRINITY_DN14281_c1_g3	OAJ38993.1	peptidyl-prolyl cis-trans isomerase [Batrachochytrium dendrobatidis JEL423]	Batrachochytrium_dendrobatidis	78.4	1.4e-73
TRINITY_DN14563_c0_g2	OAJ39743.1	actin-1 [Batrachochytrium dendrobatidis JEL423]	Batrachochytrium_dendrobatidis	93.2	1.4e-90
TRINITY_DN16546_c0_g1	XP_006678179.1	hypothetical protein BATDEDRAFT_87608 [Batrachochytrium dendrobatidis JAM81]	Batrachochytrium_dendrobatidis	71	3e-33
TRINITY_DN219_c0_g1	XP_006678515.1	hypothetical protein BATDEDRAFT_24689 [Batrachochytrium dendrobatidis JAM81]	Batrachochytrium_dendrobatidis	25.6	1.6e-06
TRINITY_DN2240_c0_g1	XP_006681369.1	hypothetical protein BATDEDRAFT_27077 [Batrachochytrium dendrobatidis JAM81]	Batrachochytrium_dendrobatidis	60.5	1.6e-18
TRINITY_DN6172_c0_g2	XP_006675747.1	hypothetical protein BATDEDRAFT_34089 [Batrachochytrium dendrobatidis JAM81]	Batrachochytrium_dendrobatidis	58.3	2.8e-06
TRINITY_DN7043_c0_g1	OAJ41138.1	fructose-bisphosphate aldolase class-I [Batrachochytrium dendrobatidis JEL423]	Batrachochytrium_dendrobatidis	55.7	6e-68
TRINITY_DN12102_c0_g1	OON10536.1	hypothetical protein BSLG_00660 [Batrachochytrium salamandrivorans]	Batrachochytrium_salamandrivorans	90.8	1.2e-27
TRINITY_DN13148_c0_g1	OON04558.1	hypothetical protein BSLG_05368 [Batrachochytrium salamandrivorans]	Batrachochytrium_salamandrivorans	84.5	9.3e-22
TRINITY_DN13384_c0_g1	OON07302.1	hypothetical protein BSLG_03207 [Batrachochytrium salamandrivorans]	Batrachochytrium_salamandrivorans	63.1	4.7e-37
TRINITY_DN13384_c0_g2	OON07302.1	hypothetical protein BSLG_03207 [Batrachochytrium salamandrivorans]	Batrachochytrium_salamandrivorans	63.1	6.1e-37
TRINITY_DN13555_c0_g1	OON07585.1	T-complex protein 1 subunit delta [Batrachochytrium salamandrivorans]	Batrachochytrium_salamandrivorans	76.7	7.5e-31
TRINITY_DN14230_c1_g16	OON07093.1	hypothetical protein BSLG_03374 [Batrachochytrium salamandrivorans]	Batrachochytrium_salamandrivorans	74	1.3e-17
TRINITY_DN14482_c0_g5	OON02944.1	NADH dehydrogenase [ubiquinone] iron-sulfur protein 2, mitochondrial [Batrachochytrium salamandrivorans]	Batrachochytrium_salamandrivorans	77.2	2.8e-186
TRINITY_DN14609_c0_g2	OON08489.1	hypothetical protein BSLG_02247 [Batrachochytrium salamandrivorans]	Batrachochytrium_salamandrivorans	48.1	4.2e-225
TRINITY_DN15527_c0_g1	OON07183.1	hypothetical protein BSLG_03300 [Batrachochytrium salamandrivorans]	Batrachochytrium_salamandrivorans	64.2	1.4e-69
TRINITY_DN4950_c0_g1	OON10074.1	hypothetical protein BSLG_01039 [Batrachochytrium salamandrivorans]	Batrachochytrium_salamandrivorans	25.8	1.6e-17
TRINITY_DN6004_c0_g2	OON02821.1	60S ribosomal protein [Batrachochytrium salamandrivorans]	Batrachochytrium_salamandrivorans	70.7	5.3e-67
TRINITY_DN8166_c0_g1	OON00598.1	dynein light chain Tctex-type 1 [Batrachochytrium salamandrivorans]	Batrachochytrium_salamandrivorans	67	7.3e-38
TRINITY_DN9319_c0_g1	OON09579.1	hypothetical protein BSLG_01404 [Batrachochytrium salamandrivorans]	Batrachochytrium_salamandrivorans	48.5	4.6e-07
TRINITY_DN6259_c0_g1	XP_007681744.1	hypothetical protein BAUCODRAFT_328589 [Baudoinia panamericana UAMH 10762]	Baudoinia_panamericana	45.5	9.9e-09
TRINITY_DN12867_c1_g2	KGQ11368.1	Fatty acid oxidation complex subunit alpha [Beauveria bassiana D1-5]	Beauveria_bassiana	43.1	3.8e-54
TRINITY_DN12958_c0_g1	KGQ11307.1	2,3-bisphosphoglycerate-dependent phosphoglycerate mutase [Beauveria bassiana D1-5]	Beauveria_bassiana	55.4	4.4e-61
TRINITY_DN12958_c0_g3	KGQ11307.1	2,3-bisphosphoglycerate-dependent phosphoglycerate mutase [Beauveria bassiana D1-5]	Beauveria_bassiana	64.2	6.8e-25
TRINITY_DN13326_c0_g1	KGQ13883.1	Putative transketolase [Beauveria bassiana D1-5]	Beauveria_bassiana	38.7	2.1e-12
TRINITY_DN14580_c0_g2	KGQ13423.1	Glycogen phosphorylase [Beauveria bassiana D1-5]	Beauveria_bassiana	49.8	7.4e-241
TRINITY_DN14855_c0_g1	KGQ11307.1	2,3-bisphosphoglycerate-dependent phosphoglycerate mutase [Beauveria bassiana D1-5]	Beauveria_bassiana	55.7	1.4e-77
TRINITY_DN16827_c0_g1	KGQ02345.1	CBS domain-containing protein CBSX3 [Beauveria bassiana D1-5]	Beauveria_bassiana	40	8.7e-23
TRINITY_DN1728_c0_g2	KGQ11369.1	3-ketoacyl-CoA thiolase [Beauveria bassiana D1-5]	Beauveria_bassiana	46.7	2.1e-62
TRINITY_DN5534_c0_g1	KGQ13655.1	Signal recognition particle protein [Beauveria bassiana D1-5]	Beauveria_bassiana	60.6	9e-25
TRINITY_DN8637_c0_g1	KGQ11411.1	Aminopeptidase N [Beauveria bassiana D1-5]	Beauveria_bassiana	45.9	2.1e-22
TRINITY_DN930_c0_g1	KGQ11285.1	Asparagine synthetase B [Beauveria bassiana D1-5]	Beauveria_bassiana	54.9	5.5e-176
TRINITY_DN11575_c0_g1	OZJ03795.1	hypothetical protein BZG36_03001 [Bifiguratus adelaidae]	Bifiguratus_adelaidae	48.8	7.6e-14
TRINITY_DN12183_c0_g1	OZJ03939.1	hypothetical protein BZG36_02935 [Bifiguratus adelaidae]	Bifiguratus_adelaidae	50.6	4.6e-20
TRINITY_DN12526_c0_g2	OZJ02427.1	40S ribosomal protein S4-A [Bifiguratus adelaidae]	Bifiguratus_adelaidae	69.4	4.1e-46
TRINITY_DN13253_c0_g2	OZJ03576.1	putative T-complex protein 1 subunit beta [Bifiguratus adelaidae]	Bifiguratus_adelaidae	71.4	5.3e-43
TRINITY_DN13352_c0_g1	OZJ05450.1	hypothetical protein BZG36_01648 [Bifiguratus adelaidae]	Bifiguratus_adelaidae	45.9	3.7e-20
TRINITY_DN13647_c0_g3	OZJ02738.1	hypothetical protein BZG36_04670 [Bifiguratus adelaidae]	Bifiguratus_adelaidae	62.9	4e-27
TRINITY_DN14412_c0_g8	OZJ03939.1	hypothetical protein BZG36_02935 [Bifiguratus adelaidae]	Bifiguratus_adelaidae	49.1	1.7e-19
TRINITY_DN14823_c0_g1	OZJ02827.1	60S ribosomal protein L22 [Bifiguratus adelaidae]	Bifiguratus_adelaidae	60	1.9e-29
TRINITY_DN1577_c0_g1	OZJ01952.1	hypothetical protein BZG36_05248 [Bifiguratus adelaidae]	Bifiguratus_adelaidae	46.8	1.2e-08
TRINITY_DN16043_c0_g1	OZJ04942.1	hypothetical protein BZG36_02640 [Bifiguratus adelaidae]	Bifiguratus_adelaidae	58.7	8.4e-90
TRINITY_DN8316_c0_g1	OZJ04224.1	hypothetical protein BZG36_02965 [Bifiguratus adelaidae]	Bifiguratus_adelaidae	63	1.4e-17
TRINITY_DN8656_c0_g1	OZJ06604.1	hypothetical protein BZG36_00438 [Bifiguratus adelaidae]	Bifiguratus_adelaidae	56.9	1.2e-14
TRINITY_DN8822_c0_g1	OZJ04844.1	Protein RER1 [Bifiguratus adelaidae]	Bifiguratus_adelaidae	70	6.2e-47
TRINITY_DN14266_c2_g1	YP_009445544.1	LAGLIDADG endonuclease (mitochondrion) [Bipolaris cookei]	Bipolaris_cookei	56.2	8e-15
TRINITY_DN1988_c0_g1	XP_007701020.1	hypothetical protein COCSADRAFT_37870 [Bipolaris sorokiniana ND90Pr]	Bipolaris_sorokiniana	66.7	8.8e-16
TRINITY_DN14312_c1_g13	YP_002274331.1	apocytochrome b [Blastocladiella emersonii]	Blastocladiella_emersonii	55.8	1.8e-111
TRINITY_DN15989_c0_g1	YP_002274323.1	NADH dehydrogenase subunit 3 [Blastocladiella emersonii]	Blastocladiella_emersonii	40.4	2.4e-10
TRINITY_DN16933_c0_g1	YP_002274323.1	NADH dehydrogenase subunit 3 [Blastocladiella emersonii]	Blastocladiella_emersonii	40	6.4e-10
TRINITY_DN3542_c0_g1	YP_002274331.1	apocytochrome b [Blastocladiella emersonii]	Blastocladiella_emersonii	56.4	1.4e-110
TRINITY_DN14129_c0_g7	YP_009517209.1	LAGLIDADG homing endonuclease (mitochondrion) [Blastosporella zonata]	Blastosporella_zonata	62.5	2.5e-36
TRINITY_DN15815_c0_g1	SZF04678.1	unnamed protein product [Blumeria graminis f. sp. hordei]	Blumeria_graminis	51.5	2.2e-21
TRINITY_DN10978_c0_g1	RKO89090.1	NAC domain-containing protein, partial [Blyttiomyces helicus]	Blyttiomyces_helicus	61.8	7.7e-13
TRINITY_DN11468_c0_g1	RKO87989.1	proteasome subunit beta type 5 [Blyttiomyces helicus]	Blyttiomyces_helicus	63.5	2e-12
TRINITY_DN12426_c0_g1	RKO91415.1	eukaryotic translation initiation factor 3 subunit 8 N-terminus-domain-containing protein, partial [Blyttiomyces helicus]	Blyttiomyces_helicus	54.6	1.6e-42
TRINITY_DN12441_c0_g1	RKO90795.1	hypothetical protein BDK51DRAFT_12345, partial [Blyttiomyces helicus]	Blyttiomyces_helicus	77.5	6.4e-09
TRINITY_DN12544_c0_g1	RKO90482.1	band 7 family-domain-containing protein [Blyttiomyces helicus]	Blyttiomyces_helicus	60.7	5.9e-72
TRINITY_DN12880_c0_g2	RKO83934.1	ribosomal protein S30, partial [Blyttiomyces helicus]	Blyttiomyces_helicus	70.4	6.2e-12
TRINITY_DN12942_c0_g1	RKO92066.1	nucleophile aminohydrolase [Blyttiomyces helicus]	Blyttiomyces_helicus	70.2	3.3e-96
TRINITY_DN13003_c0_g2	RKO85383.1	NAD binding domain of 6-phosphogluconate dehydrogenase-domain-containing protein [Blyttiomyces helicus]	Blyttiomyces_helicus	60.7	8.8e-49
TRINITY_DN13928_c0_g2	RKO83950.1	WD40-repeat-containing domain protein [Blyttiomyces helicus]	Blyttiomyces_helicus	81.1	1.6e-49
TRINITY_DN14037_c0_g2	RKO90594.1	rho family small GTP binding protein cdc42 [Blyttiomyces helicus]	Blyttiomyces_helicus	84.8	1.1e-91
TRINITY_DN14064_c0_g3	RKO92269.1	chaperonin Cpn60/TCP-1 family [Blyttiomyces helicus]	Blyttiomyces_helicus	71.6	8.4e-21
TRINITY_DN14570_c1_g1	RKO85498.1	actin, cytoplasmic 1-like protein [Blyttiomyces helicus]	Blyttiomyces_helicus	96.9	2.2e-140
TRINITY_DN14570_c1_g7	RKO85498.1	actin, cytoplasmic 1-like protein [Blyttiomyces helicus]	Blyttiomyces_helicus	97.6	8.8e-92
TRINITY_DN16088_c0_g1	RKO85733.1	ribosomal protein L6, alpha-beta domain-containing protein, partial [Blyttiomyces helicus]	Blyttiomyces_helicus	64.9	1.2e-28
TRINITY_DN5220_c0_g1	RKO84569.1	vacuolar ATP synthase 16 kDa proteolipid subunit [Blyttiomyces helicus]	Blyttiomyces_helicus	78.2	7.8e-15
TRINITY_DN8069_c0_g1	RKO89807.1	hypothetical protein BDK51DRAFT_43047 [Blyttiomyces helicus]	Blyttiomyces_helicus	31.7	5.5e-26
TRINITY_DN11170_c0_g2	KDQ07136.1	hypothetical protein BOTBODRAFT_39056 [Botryobasidium botryosum FD-172 SS1]	Botryobasidium_botryosum	70.9	3.1e-63
TRINITY_DN12091_c0_g1	KDQ20256.1	hypothetical protein BOTBODRAFT_142790 [Botryobasidium botryosum FD-172 SS1]	Botryobasidium_botryosum	54.5	4.6e-39
TRINITY_DN12678_c0_g1	KDQ19122.1	hypothetical protein BOTBODRAFT_484406 [Botryobasidium botryosum FD-172 SS1]	Botryobasidium_botryosum	48.1	3.1e-30
TRINITY_DN2909_c0_g2	KDQ05604.1	hypothetical protein BOTBODRAFT_122508, partial [Botryobasidium botryosum FD-172 SS1]	Botryobasidium_botryosum	46.7	1.7e-45
TRINITY_DN3900_c0_g1	KDQ20029.1	glycoside hydrolase family 1 protein [Botryobasidium botryosum FD-172 SS1]	Botryobasidium_botryosum	46.9	1.2e-112
TRINITY_DN5041_c0_g1	KDQ19185.1	hypothetical protein BOTBODRAFT_52343 [Botryobasidium botryosum FD-172 SS1]	Botryobasidium_botryosum	65.4	2.2e-95
TRINITY_DN8064_c0_g1	KDQ07108.1	hypothetical protein BOTBODRAFT_167354 [Botryobasidium botryosum FD-172 SS1]	Botryobasidium_botryosum	76.1	1.5e-26
TRINITY_DN13934_c1_g9	EMR87709.1	putative glycerol dehydrogenase protein [Botrytis cinerea BcDW1]	Botrytis_cinerea	87.1	5.4e-30
TRINITY_DN14129_c0_g11	AGN49006.1	LAGLIDADG endonuclease (mitochondrion) (mitochondrion) [Botrytis cinerea B05.10]	Botrytis_cinerea	73.4	4.2e-28
TRINITY_DN6506_c0_g1	EMR87737.1	putative cis-zeatin o-glucosyltransferase protein [Botrytis cinerea BcDW1]	Botrytis_cinerea	40.4	2.7e-11
TRINITY_DN13374_c0_g1	VAX57318.1	unnamed protein product [Brettanomyces bruxellensis]	Brettanomyces_bruxellensis	71.1	3.1e-12
TRINITY_DN11740_c0_g1	VEU20351.1	DEKNAAC101134 [Brettanomyces naardenensis]	Brettanomyces_naardenensis	56.8	7.8e-06
TRINITY_DN11827_c0_g3	VEU20320.1	DEKNAAC101232 [Brettanomyces naardenensis]	Brettanomyces_naardenensis	76.6	5.5e-25
TRINITY_DN5370_c0_g1	VEU20674.1	DEKNAAC101574 [Brettanomyces naardenensis]	Brettanomyces_naardenensis	48.4	7.6e-10
TRINITY_DN7820_c0_g1	VEU22257.1	DEKNAAC103282 [Brettanomyces naardenensis]	Brettanomyces_naardenensis	63	8e-21
TRINITY_DN8162_c0_g1	VEU19542.1	DEKNAAC100498 [Brettanomyces naardenensis]	Brettanomyces_naardenensis	44.4	1.2e-08
TRINITY_DN13434_c0_g4	RWQ99034.1	nicotinate phosphoribosyltransferase [Byssochlamys spectabilis]	Byssochlamys_spectabilis	45	1.7e-12
TRINITY_DN16395_c0_g1	PVH75320.1	oxidoreductase-like protein [Cadophora sp. DSE1049]	Cadophora_sp._DSE1049	59.2	3.1e-104
TRINITY_DN11934_c0_g1	KZT58012.1	proteasome endopeptidase complex, beta subunit [Calocera cornea HHB12733]	Calocera_cornea	54.5	6.4e-69
TRINITY_DN11934_c0_g2	KZT58012.1	proteasome endopeptidase complex, beta subunit [Calocera cornea HHB12733]	Calocera_cornea	54.9	7.9e-67
TRINITY_DN13511_c0_g1	KZT57062.1	translation initiation factor 3 subunit 3 [Calocera cornea HHB12733]	Calocera_cornea	28.7	1.1e-07
TRINITY_DN13591_c0_g1	KZT57792.1	PC4-domain-containing protein [Calocera cornea HHB12733]	Calocera_cornea	56.5	3e-12
TRINITY_DN4702_c0_g1	KZT56527.1	autophagy protein 8 [Calocera cornea HHB12733]	Calocera_cornea	41.1	8.1e-20
TRINITY_DN7275_c0_g1	KZT56527.1	autophagy protein 8 [Calocera cornea HHB12733]	Calocera_cornea	42.6	1.6e-13
TRINITY_DN12588_c0_g1	KZO98944.1	UV excision repair protein Rad23 [Calocera viscosa TUFC12733]	Calocera_viscosa	68.6	4.8e-12
TRINITY_DN16595_c0_g1	KZO98409.1	HMG-box [Calocera viscosa TUFC12733]	Calocera_viscosa	48	5.3e-10
TRINITY_DN611_c0_g1	KZO90140.1	chaperonin GroL [Calocera viscosa TUFC12733]	Calocera_viscosa	44.6	8.1e-07
TRINITY_DN65_c0_g1	KZO90738.1	hypothetical protein CALVIDRAFT_568801 [Calocera viscosa TUFC12733]	Calocera_viscosa	61.3	2.1e-16
TRINITY_DN7087_c0_g1	KZO97889.1	polyadenylate binding protein [Calocera viscosa TUFC12733]	Calocera_viscosa	61.5	2.1e-30
TRINITY_DN13667_c0_g1	KGQ83229.1	hypothetical protein MEO_05147 [Candida albicans P94015]	Candida_albicans	21.8	1.5e-17
TRINITY_DN4795_c0_g2	EEQ47410.1	DNA replication licensing factor mcm7 [Candida albicans WO-1]	Candida_albicans	84.4	1.2e-34
TRINITY_DN10499_c0_g1	AAA34366.1	ribosomal protein L41 [Candida maltosa]	Candida_maltosa	100	1.8e-27
TRINITY_DN10499_c0_g2	AAA34366.1	ribosomal protein L41 [Candida maltosa]	Candida_maltosa	99	6e-51
TRINITY_DN15633_c0_g1	XP_002545912.1	hypothetical protein CTRG_00693 [Candida tropicalis MYA-3404]	Candida_tropicalis	60.3	1.8e-20
TRINITY_DN10001_c0_g3	XP_026588276.1	Glycogen debranching enzyme [Candida viswanathii]	Candida_viswanathii	56.3	1.9e-42
TRINITY_DN10033_c1_g1	ORZ31014.1	alpha-amylase [Catenaria anguillulae PL171]	Catenaria_anguillulae	40.1	7e-36
TRINITY_DN11197_c0_g1	ORZ39486.1	acyl-CoA dehydrogenase/oxidase, partial [Catenaria anguillulae PL171]	Catenaria_anguillulae	39.2	7.5e-09
TRINITY_DN13202_c0_g1	ORZ40198.1	band 7 family-domain-containing protein [Catenaria anguillulae PL171]	Catenaria_anguillulae	62.3	8.4e-57
TRINITY_DN13778_c0_g3	ORZ39813.1	small GTPase [Catenaria anguillulae PL171]	Catenaria_anguillulae	81	4.3e-90
TRINITY_DN14073_c0_g1	ORZ33754.1	40S ribosomal protein s2 [Catenaria anguillulae PL171]	Catenaria_anguillulae	79.6	6e-99
TRINITY_DN14073_c0_g2	ORZ33754.1	40S ribosomal protein s2 [Catenaria anguillulae PL171]	Catenaria_anguillulae	79.6	1.3e-98
TRINITY_DN14322_c0_g1	ORZ34978.1	40S ribosomal protein S4, Y isoform 1-like protein [Catenaria anguillulae PL171]	Catenaria_anguillulae	77	2.9e-119
TRINITY_DN14393_c0_g1	ORZ38336.1	fructose-bisphosphate aldolase [Catenaria anguillulae PL171]	Catenaria_anguillulae	68.6	3.3e-133
TRINITY_DN14393_c0_g2	ORZ38336.1	fructose-bisphosphate aldolase [Catenaria anguillulae PL171]	Catenaria_anguillulae	67.5	1.6e-132
TRINITY_DN2336_c0_g1	ORZ38179.1	ribosomal protein L32e [Catenaria anguillulae PL171]	Catenaria_anguillulae	69.3	4.3e-23
TRINITY_DN3625_c0_g1	ORZ32585.1	Snf7-domain-containing protein [Catenaria anguillulae PL171]	Catenaria_anguillulae	64.1	3.2e-28
TRINITY_DN5602_c0_g2	ORZ41584.1	ribosomal protein L2 [Catenaria anguillulae PL171]	Catenaria_anguillulae	64.6	1.2e-36
TRINITY_DN9634_c0_g1	ORZ40876.1	hypothetical protein BCR44DRAFT_34783 [Catenaria anguillulae PL171]	Catenaria_anguillulae	61.9	2.7e-55
TRINITY_DN9791_c0_g1	ORZ33458.1	inosine-5'-monophosphate dehydrogenase 1 [Catenaria anguillulae PL171]	Catenaria_anguillulae	69.3	5.3e-47
TRINITY_DN11010_c0_g2	RKP02169.1	hypothetical protein CXG81DRAFT_25187 [Caulochytrium protostelioides]	Caulochytrium_protostelioides	78.3	1.3e-46
TRINITY_DN13054_c0_g2	RKO97261.1	hypothetical protein CAUPRSCDRAFT_6768 [Caulochytrium protostelioides]	Caulochytrium_protostelioides	92.3	5.5e-40
TRINITY_DN13922_c0_g1	RKP02297.1	hypothetical protein CXG81DRAFT_29547 [Caulochytrium protostelioides]	Caulochytrium_protostelioides	58.2	6.6e-52
TRINITY_DN13928_c1_g1	RKP02947.1	hypothetical protein CXG81DRAFT_24444 [Caulochytrium protostelioides]	Caulochytrium_protostelioides	75.6	2.3e-90
TRINITY_DN14257_c0_g1	RKO97413.1	EF-hand, partial [Caulochytrium protostelioides]	Caulochytrium_protostelioides	70.3	1.1e-56
TRINITY_DN14257_c0_g2	RKO97413.1	EF-hand, partial [Caulochytrium protostelioides]	Caulochytrium_protostelioides	69	1.7e-55
TRINITY_DN14257_c0_g3	RKO97413.1	EF-hand, partial [Caulochytrium protostelioides]	Caulochytrium_protostelioides	58.7	5.3e-43
TRINITY_DN14387_c2_g2	RKO95548.1	hypothetical protein CAUPRSCDRAFT_9064, partial [Caulochytrium protostelioides]	Caulochytrium_protostelioides	40.4	1e-24
TRINITY_DN14563_c0_g1	RKO99664.1	hypothetical protein CXG81DRAFT_27595 [Caulochytrium protostelioides]	Caulochytrium_protostelioides	91.2	3.4e-203
TRINITY_DN14563_c0_g4	RKO99664.1	hypothetical protein CXG81DRAFT_27595 [Caulochytrium protostelioides]	Caulochytrium_protostelioides	91.7	7.4e-204
TRINITY_DN14563_c0_g7	RKO99664.1	hypothetical protein CXG81DRAFT_27595 [Caulochytrium protostelioides]	Caulochytrium_protostelioides	94.4	4.1e-209
TRINITY_DN14570_c1_g5	RKO99664.1	hypothetical protein CXG81DRAFT_27595 [Caulochytrium protostelioides]	Caulochytrium_protostelioides	91.7	1.7e-203
TRINITY_DN14570_c1_g8	RKO99664.1	hypothetical protein CXG81DRAFT_27595 [Caulochytrium protostelioides]	Caulochytrium_protostelioides	91.2	1.5e-202
TRINITY_DN2487_c0_g1	RKP01315.1	hypothetical protein CXG81DRAFT_12146 [Caulochytrium protostelioides]	Caulochytrium_protostelioides	35.1	1.9e-18
TRINITY_DN5951_c0_g1	RKP01564.1	hypothetical protein CXG81DRAFT_18670 [Caulochytrium protostelioides]	Caulochytrium_protostelioides	37.2	6.2e-06
TRINITY_DN6010_c0_g1	RKO96815.1	S-adenosyl-L-homocysteine hydrolase [Caulochytrium protostelioides]	Caulochytrium_protostelioides	61.7	1.5e-54
TRINITY_DN12531_c0_g3	OCK91543.1	hypothetical protein K441DRAFT_664471 [Cenococcum geophilum 1.58]	Cenococcum_geophilum	70	4.6e-18
TRINITY_DN15983_c0_g1	OCL00232.1	hypothetical protein K441DRAFT_651026 [Cenococcum geophilum 1.58]	Cenococcum_geophilum	47.1	2.3e-13
TRINITY_DN7470_c0_g1	CEH16123.1	proteasome subunit alpha type 1 [Ceraceosorus bombacis]	Ceraceosorus_bombacis	76.7	2.6e-24
TRINITY_DN14594_c1_g11	YP_007507038.1	intronic ORF at intron 1 of rnl (mitochondrion) [Ceratocystis cacaofunesta]	Ceratocystis_cacaofunesta	50.3	9.8e-43
TRINITY_DN14594_c1_g15	YP_007507038.1	intronic ORF at intron 1 of rnl (mitochondrion) [Ceratocystis cacaofunesta]	Ceratocystis_cacaofunesta	54.2	7.1e-08
TRINITY_DN9953_c0_g1	KKF96218.1	Calcium/calmodulin-dependent protein kinase type I [Ceratocystis platani]	Ceratocystis_platani	41.3	3e-16
TRINITY_DN16411_c0_g1	PKS04195.1	Nuclear localization sequence-binding protein [Cercospora zeina]	Cercospora_zeina	36	1.5e-27
TRINITY_DN13374_c0_g2	XP_006696798.1	putative nucleoside protein [Chaetomium thermophilum var. thermophilum DSM 1495]	Chaetomium_thermophilum	71.1	4.4e-61
TRINITY_DN14131_c0_g6	XP_006697199.1	hypothetical protein CTHT_0069160 [Chaetomium thermophilum var. thermophilum DSM 1495]	Chaetomium_thermophilum	34.1	6.3e-06
TRINITY_DN15480_c0_g1	XP_006697393.1	60S ribosomal protein l7-like protein [Chaetomium thermophilum var. thermophilum DSM 1495]	Chaetomium_thermophilum	62.4	1.7e-76
TRINITY_DN928_c0_g1	XP_006691738.1	putative elongation factor [Chaetomium thermophilum var. thermophilum DSM 1495]	Chaetomium_thermophilum	82.8	3e-225
TRINITY_DN14371_c0_g2	TAQ84706.1	hypothetical protein B7494_g6967 [Chlorociboria aeruginascens]	Chlorociboria_aeruginascens	57.1	1e-58
TRINITY_DN1133_c0_g1	OBZ85099.1	60S acidic ribosomal protein P1 [Choanephora cucurbitarum]	Choanephora_cucurbitarum	60	5.8e-12
TRINITY_DN11953_c0_g1	OBZ81664.1	putative oligoribonuclease [Choanephora cucurbitarum]	Choanephora_cucurbitarum	60	8.6e-28
TRINITY_DN12066_c0_g1	OBZ82787.1	ATPase 6, plasma membrane-type [Choanephora cucurbitarum]	Choanephora_cucurbitarum	59	1.2e-73
TRINITY_DN12120_c0_g2	OBZ86621.1	Transaldolase [Choanephora cucurbitarum]	Choanephora_cucurbitarum	74.7	1.6e-94
TRINITY_DN12695_c0_g1	OBZ89585.1	hypothetical protein A0J61_02367 [Choanephora cucurbitarum]	Choanephora_cucurbitarum	46.5	5.4e-39
TRINITY_DN13101_c0_g1	OBZ80825.1	GTP-binding protein rhoA [Choanephora cucurbitarum]	Choanephora_cucurbitarum	73.6	1.6e-77
TRINITY_DN14256_c0_g1	OBZ84995.1	Peroxiredoxin-1, partial [Choanephora cucurbitarum]	Choanephora_cucurbitarum	72.3	7.1e-78
TRINITY_DN1650_c0_g1	OBZ91939.1	DNA-directed RNA polymerases I, II, and III subunit RPABC5 [Choanephora cucurbitarum]	Choanephora_cucurbitarum	81	1.9e-25
TRINITY_DN1661_c0_g1	OBZ91875.1	Thioredoxin-like protein 1 [Choanephora cucurbitarum]	Choanephora_cucurbitarum	55.9	9.2e-26
TRINITY_DN2701_c0_g1	OBZ85838.1	hypothetical protein A0J61_06114, partial [Choanephora cucurbitarum]	Choanephora_cucurbitarum	52.5	3.6e-19
TRINITY_DN6810_c0_g1	OBZ87171.1	Dolichyl-diphosphooligosaccharide--protein glycosyltransferase subunit [Choanephora cucurbitarum]	Choanephora_cucurbitarum	47.1	6.7e-14
TRINITY_DN7632_c0_g1	OBZ85321.1	60S ribosomal protein L29, partial [Choanephora cucurbitarum]	Choanephora_cucurbitarum	78.4	1.6e-13
TRINITY_DN10647_c0_g2	RPA98816.1	Golgi phospho protein 3 [Choiromyces venosus 120613-1]	Choiromyces_venosus	93.9	5.6e-169
TRINITY_DN10850_c0_g3	RPA98763.1	Mov34-domain-containing protein [Choiromyces venosus 120613-1]	Choiromyces_venosus	84.1	6.1e-97
TRINITY_DN10949_c0_g2	RPB05653.1	kinase-like protein [Choiromyces venosus 120613-1]	Choiromyces_venosus	51.7	1.4e-55
TRINITY_DN11007_c0_g3	RPA92955.1	ATP-dependent protease La [Choiromyces venosus 120613-1]	Choiromyces_venosus	70.8	3.8e-19
TRINITY_DN11440_c0_g1	RPA96574.1	phospholipase D [Choiromyces venosus 120613-1]	Choiromyces_venosus	54.7	3.6e-23
TRINITY_DN12469_c0_g1	RPA94908.1	pre-mRNA branch site protein p14 [Choiromyces venosus 120613-1]	Choiromyces_venosus	96.5	6.1e-58
TRINITY_DN12537_c0_g1	RPA91138.1	hypothetical protein L873DRAFT_348124 [Choiromyces venosus 120613-1]	Choiromyces_venosus	91.2	9.5e-20
TRINITY_DN12762_c0_g2	RPB04243.1	hypothetical protein L873DRAFT_1667748 [Choiromyces venosus 120613-1]	Choiromyces_venosus	70.1	2.6e-166
TRINITY_DN12847_c0_g3	RPA95507.1	DDE-domain-containing protein [Choiromyces venosus 120613-1]	Choiromyces_venosus	60.7	1.7e-09
TRINITY_DN12869_c0_g1	RPA97844.1	hypothetical protein L873DRAFT_1844623 [Choiromyces venosus 120613-1]	Choiromyces_venosus	59.5	6.8e-32
TRINITY_DN13182_c0_g1	RPA98721.1	hypothetical protein L873DRAFT_1006996 [Choiromyces venosus 120613-1]	Choiromyces_venosus	61.2	4.8e-25
TRINITY_DN13393_c0_g5	RPA94888.1	ankyrin [Choiromyces venosus 120613-1]	Choiromyces_venosus	49.5	4.1e-08
TRINITY_DN13516_c0_g1	RPA97959.1	hypothetical protein L873DRAFT_1081249 [Choiromyces venosus 120613-1]	Choiromyces_venosus	64.7	5.8e-56
TRINITY_DN13652_c0_g3	RPA92817.1	hypothetical protein L873DRAFT_1830958 [Choiromyces venosus 120613-1]	Choiromyces_venosus	48	7.9e-27
TRINITY_DN13652_c0_g4	RPA92817.1	hypothetical protein L873DRAFT_1830958 [Choiromyces venosus 120613-1]	Choiromyces_venosus	74.9	5.1e-91
TRINITY_DN13656_c0_g1	RPB02248.1	protein phosphatase 2A regulatory subunit PR55 [Choiromyces venosus 120613-1]	Choiromyces_venosus	97.3	3.1e-271
TRINITY_DN13727_c0_g9	RPB00057.1	40S ribosomal protein S21 [Choiromyces venosus 120613-1]	Choiromyces_venosus	96.6	1.5e-41
TRINITY_DN13750_c0_g2	RPA94103.1	hypothetical protein L873DRAFT_1702599 [Choiromyces venosus 120613-1]	Choiromyces_venosus	90	9e-07
TRINITY_DN13865_c0_g2	RPB00627.1	hypothetical protein L873DRAFT_1679646 [Choiromyces venosus 120613-1]	Choiromyces_venosus	49.4	4.6e-10
TRINITY_DN13967_c0_g5	RPB06184.1	hypothetical protein L873DRAFT_1660438 [Choiromyces venosus 120613-1]	Choiromyces_venosus	72.4	8.4e-254
TRINITY_DN13977_c0_g1	RPA96667.1	hypothetical protein L873DRAFT_1207028 [Choiromyces venosus 120613-1]	Choiromyces_venosus	38.6	1.1e-08
TRINITY_DN14005_c0_g9	RPA97844.1	hypothetical protein L873DRAFT_1844623 [Choiromyces venosus 120613-1]	Choiromyces_venosus	54.2	8.3e-14
TRINITY_DN14009_c0_g7	RPA92197.1	glyceraldehyde 3-phosphate dehydrogenase [Choiromyces venosus 120613-1]	Choiromyces_venosus	87.2	1.7e-166
TRINITY_DN14058_c3_g3	RPA94896.1	hypothetical protein L873DRAFT_1813718 [Choiromyces venosus 120613-1]	Choiromyces_venosus	83.8	1.4e-205
TRINITY_DN14059_c2_g14	RPB03776.1	hypothetical protein L873DRAFT_99073 [Choiromyces venosus 120613-1]	Choiromyces_venosus	39.2	3.9e-92
TRINITY_DN14104_c2_g5	RPB02533.1	hypothetical protein L873DRAFT_1826598 [Choiromyces venosus 120613-1]	Choiromyces_venosus	64.1	1.2e-123
TRINITY_DN14130_c2_g3	RPA99367.1	DUF862-domain-containing protein [Choiromyces venosus 120613-1]	Choiromyces_venosus	70.5	7.7e-89
TRINITY_DN14156_c0_g3	RPB01044.1	CTP synthase [Choiromyces venosus 120613-1]	Choiromyces_venosus	84.9	7.2e-288
TRINITY_DN14174_c0_g2	RPB04752.1	hypothetical protein L873DRAFT_1840257 [Choiromyces venosus 120613-1]	Choiromyces_venosus	32.9	2.9e-28
TRINITY_DN14218_c0_g18	RPB01078.1	WD40 repeat-like protein [Choiromyces venosus 120613-1]	Choiromyces_venosus	50.8	1.1e-09
TRINITY_DN14224_c0_g1	RPB05671.1	hypothetical protein L873DRAFT_1661613 [Choiromyces venosus 120613-1]	Choiromyces_venosus	53.2	1.9e-42
TRINITY_DN14227_c1_g2	RPA88749.1	hypothetical protein L873DRAFT_1824105 [Choiromyces venosus 120613-1]	Choiromyces_venosus	42.3	5.5e-06
TRINITY_DN14232_c1_g2	RPB05810.1	AB-hydrolase YheT [Choiromyces venosus 120613-1]	Choiromyces_venosus	67.3	3.7e-106
TRINITY_DN14250_c1_g24	RPA94530.1	hypothetical protein L873DRAFT_1701105 [Choiromyces venosus 120613-1]	Choiromyces_venosus	52.9	2.1e-216
TRINITY_DN14250_c1_g25	RPA94528.1	AAA-domain-containing protein [Choiromyces venosus 120613-1]	Choiromyces_venosus	62.4	3.2e-114
TRINITY_DN14258_c1_g7	RPA92563.1	UvrD-helicase-domain-containing protein [Choiromyces venosus 120613-1]	Choiromyces_venosus	72.7	7.5e-46
TRINITY_DN14278_c1_g23	RPB01078.1	WD40 repeat-like protein [Choiromyces venosus 120613-1]	Choiromyces_venosus	50.2	2e-66
TRINITY_DN14284_c1_g10	RPA96658.1	3(2),5-bisphosphate nucleotidase HAL2 [Choiromyces venosus 120613-1]	Choiromyces_venosus	67.7	3.5e-129
TRINITY_DN14290_c0_g6	RPA96644.1	ubiquitin-conjugating enzyme type E2 [Choiromyces venosus 120613-1]	Choiromyces_venosus	93.5	1.1e-79
TRINITY_DN14292_c0_g15	RPA92848.1	hypothetical protein L873DRAFT_1749831 [Choiromyces venosus 120613-1]	Choiromyces_venosus	67.4	4.2e-145
TRINITY_DN14300_c1_g11	RPA92602.1	hypothetical protein L873DRAFT_1831064 [Choiromyces venosus 120613-1]	Choiromyces_venosus	54.3	4.9e-57
TRINITY_DN14300_c1_g7	RPB00519.1	hypothetical protein L873DRAFT_1804929 [Choiromyces venosus 120613-1]	Choiromyces_venosus	70.3	3.4e-06
TRINITY_DN14301_c1_g3	RPA94818.1	Nop14-like protein [Choiromyces venosus 120613-1]	Choiromyces_venosus	57.1	1.3e-08
TRINITY_DN14317_c2_g6	RPB00038.1	DDE-domain-containing protein, partial [Choiromyces venosus 120613-1]	Choiromyces_venosus	61.2	8.8e-18
TRINITY_DN14329_c1_g2	RPB01426.1	thioredoxin-like protein [Choiromyces venosus 120613-1]	Choiromyces_venosus	50.8	9.9e-37
TRINITY_DN14341_c0_g7	RPA99324.1	hypothetical protein L873DRAFT_918486 [Choiromyces venosus 120613-1]	Choiromyces_venosus	63.6	1.5e-44
TRINITY_DN14352_c0_g5	RPB05794.1	DUF947-domain-containing protein [Choiromyces venosus 120613-1]	Choiromyces_venosus	53.2	2.1e-27
TRINITY_DN14354_c1_g4	RPA95954.1	SIN1-domain-containing protein [Choiromyces venosus 120613-1]	Choiromyces_venosus	57.4	8.7e-189
TRINITY_DN14396_c0_g9	RPB04216.1	hypothetical protein L873DRAFT_1667395 [Choiromyces venosus 120613-1]	Choiromyces_venosus	79.7	2e-172
TRINITY_DN14434_c0_g13	RPA99291.1	hypothetical protein L873DRAFT_915233 [Choiromyces venosus 120613-1]	Choiromyces_venosus	82.6	4.7e-73
TRINITY_DN14434_c0_g9	RPB04243.1	hypothetical protein L873DRAFT_1667748 [Choiromyces venosus 120613-1]	Choiromyces_venosus	71.8	5e-42
TRINITY_DN14440_c1_g19	RPB05605.1	hypothetical protein L873DRAFT_520757 [Choiromyces venosus 120613-1]	Choiromyces_venosus	55.9	1.7e-15
TRINITY_DN14461_c1_g26	RPB05697.1	protein phosphatase 5 [Choiromyces venosus 120613-1]	Choiromyces_venosus	76.6	1.7e-217
TRINITY_DN14479_c2_g4	RPB06216.1	hypothetical protein L873DRAFT_32097 [Choiromyces venosus 120613-1]	Choiromyces_venosus	37.9	6.5e-08
TRINITY_DN14485_c0_g10	RPB04402.1	hypothetical protein L873DRAFT_1349059 [Choiromyces venosus 120613-1]	Choiromyces_venosus	63.2	3.1e-06
TRINITY_DN14491_c1_g14	RPB05861.1	hypothetical protein L873DRAFT_1832601 [Choiromyces venosus 120613-1]	Choiromyces_venosus	100	5.7e-14
TRINITY_DN14514_c0_g15	RPB02555.1	glycoside hydrolase [Choiromyces venosus 120613-1]	Choiromyces_venosus	46.2	2.3e-10
TRINITY_DN14515_c0_g2	RPA92650.1	kinase-like protein [Choiromyces venosus 120613-1]	Choiromyces_venosus	49.3	2.2e-34
TRINITY_DN14527_c1_g13	RPA94508.1	FAD/NAD(P)-binding domain-containing protein [Choiromyces venosus 120613-1]	Choiromyces_venosus	79.6	1.8e-62
TRINITY_DN14531_c0_g11	RPA97647.1	hypothetical protein L873DRAFT_1689916 [Choiromyces venosus 120613-1]	Choiromyces_venosus	53.4	3.1e-08
TRINITY_DN14534_c0_g2	RPA98407.1	hypothetical protein L873DRAFT_1043384 [Choiromyces venosus 120613-1]	Choiromyces_venosus	46.8	1.3e-69
TRINITY_DN14538_c2_g11	RPA92565.1	ankyrin [Choiromyces venosus 120613-1]	Choiromyces_venosus	36.2	3e-13
TRINITY_DN14540_c1_g10	RPB02016.1	acyl-CoA N-acyltransferase [Choiromyces venosus 120613-1]	Choiromyces_venosus	49.5	3.8e-32
TRINITY_DN14543_c1_g11	RPA98067.1	mitochondrial 54S ribosomal protein YmL16 [Choiromyces venosus 120613-1]	Choiromyces_venosus	67.1	5.1e-76
TRINITY_DN14549_c0_g6	RPB00519.1	hypothetical protein L873DRAFT_1804929 [Choiromyces venosus 120613-1]	Choiromyces_venosus	53.5	1.6e-18
TRINITY_DN14553_c3_g5	RPA93898.1	hypothetical protein L873DRAFT_1494617 [Choiromyces venosus 120613-1]	Choiromyces_venosus	75	5.5e-21
TRINITY_DN14577_c0_g1	RPA92563.1	UvrD-helicase-domain-containing protein [Choiromyces venosus 120613-1]	Choiromyces_venosus	71.9	2.1e-162
TRINITY_DN14586_c1_g14	RPA97208.1	hypothetical protein L873DRAFT_1691487, partial [Choiromyces venosus 120613-1]	Choiromyces_venosus	59.4	2.3e-46
TRINITY_DN14587_c3_g4	RPB05807.1	hypothetical protein L873DRAFT_1661444 [Choiromyces venosus 120613-1]	Choiromyces_venosus	79.6	5.4e-15
TRINITY_DN14593_c3_g2	RPA93820.1	hypothetical protein L873DRAFT_1846995 [Choiromyces venosus 120613-1]	Choiromyces_venosus	79.5	1.8e-30
TRINITY_DN14599_c3_g10	RPA98111.1	hypothetical protein L873DRAFT_1569971, partial [Choiromyces venosus 120613-1]	Choiromyces_venosus	63.2	6.9e-183
TRINITY_DN14618_c3_g20	RPB04086.1	hypothetical protein L873DRAFT_1759251 [Choiromyces venosus 120613-1]	Choiromyces_venosus	40.7	5.4e-17
TRINITY_DN14618_c3_g30	RPA93860.1	hypothetical protein L873DRAFT_1615166, partial [Choiromyces venosus 120613-1]	Choiromyces_venosus	55.6	3.8e-26
TRINITY_DN14642_c0_g1	RPA91229.1	hypothetical protein L873DRAFT_1714977 [Choiromyces venosus 120613-1]	Choiromyces_venosus	72.2	1.1e-18
TRINITY_DN15042_c0_g1	RPA94340.1	hypothetical protein L873DRAFT_1793016 [Choiromyces venosus 120613-1]	Choiromyces_venosus	40.4	6.6e-60
TRINITY_DN15318_c0_g1	RPA94508.1	FAD/NAD(P)-binding domain-containing protein [Choiromyces venosus 120613-1]	Choiromyces_venosus	75.8	5.9e-208
TRINITY_DN1612_c0_g1	RPA96629.1	hypothetical protein L873DRAFT_1810972 [Choiromyces venosus 120613-1]	Choiromyces_venosus	66.1	1.9e-12
TRINITY_DN16191_c0_g1	RPB04549.1	hypothetical protein L873DRAFT_1799478 [Choiromyces venosus 120613-1]	Choiromyces_venosus	74.1	2.6e-26
TRINITY_DN16253_c0_g1	RPA90312.1	hypothetical protein L873DRAFT_1782959 [Choiromyces venosus 120613-1]	Choiromyces_venosus	93.7	8.2e-83
TRINITY_DN16310_c0_g1	RPA92742.1	hypothetical protein L873DRAFT_1847583 [Choiromyces venosus 120613-1]	Choiromyces_venosus	88	0
TRINITY_DN16988_c0_g1	RPB05908.1	hypothetical protein L873DRAFT_1839431 [Choiromyces venosus 120613-1]	Choiromyces_venosus	78.6	4.6e-33
TRINITY_DN1909_c0_g1	RPA95872.1	hypothetical protein L873DRAFT_1845711 [Choiromyces venosus 120613-1]	Choiromyces_venosus	62.9	0
TRINITY_DN2181_c0_g1	RPB00643.1	hypothetical protein L873DRAFT_758350 [Choiromyces venosus 120613-1]	Choiromyces_venosus	49.3	9e-08
TRINITY_DN2581_c0_g1	RPB04427.1	DDE-domain-containing protein [Choiromyces venosus 120613-1]	Choiromyces_venosus	63.4	1.9e-32
TRINITY_DN3445_c0_g1	RPB05395.1	hypothetical protein L873DRAFT_789262 [Choiromyces venosus 120613-1]	Choiromyces_venosus	56.3	9.1e-60
TRINITY_DN3469_c0_g1	RPB05848.1	ARM repeat-containing protein [Choiromyces venosus 120613-1]	Choiromyces_venosus	77	4.2e-95
TRINITY_DN350_c0_g1	RPA99790.1	alpha/beta-hydrolase [Choiromyces venosus 120613-1]	Choiromyces_venosus	67.5	4.4e-122
TRINITY_DN3775_c0_g1	RPB05661.1	hypothetical protein L873DRAFT_1797378 [Choiromyces venosus 120613-1]	Choiromyces_venosus	45.2	1.3e-141
TRINITY_DN4094_c0_g1	RPA90326.1	DDE-domain-containing protein, partial [Choiromyces venosus 120613-1]	Choiromyces_venosus	43.1	1.6e-21
TRINITY_DN5237_c0_g1	RPA97126.1	Sm-like ribonucleo protein [Choiromyces venosus 120613-1]	Choiromyces_venosus	90.7	1.5e-64
TRINITY_DN5522_c0_g1	RPA97501.1	hypothetical protein L873DRAFT_1809538 [Choiromyces venosus 120613-1]	Choiromyces_venosus	81.6	4.8e-28
TRINITY_DN5632_c0_g2	RPA93662.1	Sm-like ribonucleo protein [Choiromyces venosus 120613-1]	Choiromyces_venosus	93.8	2.3e-46
TRINITY_DN5633_c0_g1	RPA89756.1	hypothetical protein L873DRAFT_1783668 [Choiromyces venosus 120613-1]	Choiromyces_venosus	62.4	4.1e-21
TRINITY_DN5642_c0_g1	RPA91204.1	ankyrin [Choiromyces venosus 120613-1]	Choiromyces_venosus	32.9	1.8e-09
TRINITY_DN5925_c0_g1	RPA92566.1	DNA/RNA polymerase [Choiromyces venosus 120613-1]	Choiromyces_venosus	70.1	4.6e-19
TRINITY_DN6378_c0_g1	RPA91280.1	hypothetical protein L873DRAFT_1571070, partial [Choiromyces venosus 120613-1]	Choiromyces_venosus	42.7	1.4e-37
TRINITY_DN8475_c0_g2	RPA98635.1	RING/U-box [Choiromyces venosus 120613-1]	Choiromyces_venosus	86.8	2.3e-55
TRINITY_DN8501_c0_g1	RPA95230.1	PEBP-like protein [Choiromyces venosus 120613-1]	Choiromyces_venosus	58.8	2e-106
TRINITY_DN8512_c0_g2	RPA97847.1	hypothetical protein L873DRAFT_1091989 [Choiromyces venosus 120613-1]	Choiromyces_venosus	41	4.5e-09
TRINITY_DN14214_c0_g6	YP_009262106.1	hypothetical protein (mitochondrion) [Chrysoporthe deuterocubensis]	Chrysoporthe_deuterocubensis	47.1	4.1e-71
TRINITY_DN14118_c0_g6	AAU94660.1	HSP70, partial [Chytriomyces confervae]	Chytriomyces_confervae	89	5e-76
TRINITY_DN15469_c0_g1	ANM86565.1	putative dioxygenase [Cladonia uncialis subsp. uncialis]	Cladonia_uncialis	78.2	7.2e-44
TRINITY_DN6858_c0_g1	XP_008729905.1	hypothetical protein G647_07367 [Cladophialophora carrionii CBS 160.54]	Cladophialophora_carrionii	27.1	3.4e-11
TRINITY_DN12113_c0_g2	XP_016252156.1	E3 ubiquitin-protein ligase RSP5 [Cladophialophora immunda]	Cladophialophora_immunda	56.7	2.4e-22
TRINITY_DN14129_c0_g14	CCE35442.1	probable intron-encoded endonuclease aI1, partial (mitochondrion) [Claviceps purpurea]	Claviceps_purpurea	50.3	1.1e-195
TRINITY_DN14347_c0_g1	CCE28453.1	probable phosphoglycerate kinase [Claviceps purpurea 20.1]	Claviceps_purpurea	69.5	2.8e-163
TRINITY_DN14411_c0_g2	CCE31728.1	uncharacterized protein CPUR_05583 [Claviceps purpurea 20.1]	Claviceps_purpurea	39.8	2.1e-20
TRINITY_DN14411_c0_g5	CCE31728.1	uncharacterized protein CPUR_05583 [Claviceps purpurea 20.1]	Claviceps_purpurea	45	1.6e-74
TRINITY_DN10428_c0_g1	ORY10924.1	Glucose/Sorbosone dehydrogenase [Clohesyomyces aquaticus]	Clohesyomyces_aquaticus	36.8	2.4e-06
TRINITY_DN14532_c1_g2	KMP02570.1	hypothetical protein CIRG_10393 [Coccidioides immitis RMSCC 2394]	Coccidioides_immitis	58.8	1.8e-12
TRINITY_DN14542_c0_g2	KMP02570.1	hypothetical protein CIRG_10393 [Coccidioides immitis RMSCC 2394]	Coccidioides_immitis	50	4.4e-06
TRINITY_DN9210_c0_g1	XP_001239221.1	GTP-binding nuclear protein GSP1/Ran [Coccidioides immitis RS]	Coccidioides_immitis	88.6	8.9e-30
TRINITY_DN13657_c0_g1	XP_003069685.1	60S ribosomal protein L25 [Coccidioides posadasii C735 delta SOWgp]	Coccidioides_posadasii	74.2	1.1e-42
TRINITY_DN13657_c0_g2	XP_003069685.1	60S ribosomal protein L25 [Coccidioides posadasii C735 delta SOWgp]	Coccidioides_posadasii	73.8	3.2e-45
TRINITY_DN6510_c0_g1	XP_003070902.1	kinesin, putative [Coccidioides posadasii C735 delta SOWgp]	Coccidioides_posadasii	77.8	3.6e-23
TRINITY_DN12455_c0_g1	PIA15695.1	Prefoldin beta-like protein [Coemansia reversa NRRL 1564]	Coemansia_reversa	58.8	3.5e-18
TRINITY_DN13221_c0_g1	PIA17849.1	hypothetical protein COEREDRAFT_80184 [Coemansia reversa NRRL 1564]	Coemansia_reversa	76.4	7.5e-34
TRINITY_DN13267_c0_g2	PIA17069.1	glutathione peroxidase [Coemansia reversa NRRL 1564]	Coemansia_reversa	42.9	2.4e-21
TRINITY_DN13321_c0_g4	PIA14358.1	mitochondrial aspartate aminotransferas-like protein [Coemansia reversa NRRL 1564]	Coemansia_reversa	59.6	3.1e-07
TRINITY_DN13650_c0_g1	PIA15874.1	hypothetical protein COEREDRAFT_43931 [Coemansia reversa NRRL 1564]	Coemansia_reversa	65	8.1e-37
TRINITY_DN15101_c0_g1	PIA13061.1	COX6A-domain-containing protein [Coemansia reversa NRRL 1564]	Coemansia_reversa	44.6	2.6e-10
TRINITY_DN17091_c0_g1	PIA13061.1	COX6A-domain-containing protein [Coemansia reversa NRRL 1564]	Coemansia_reversa	39	5.8e-08
TRINITY_DN4917_c0_g1	PIA13987.1	kinase-like protein [Coemansia reversa NRRL 1564]	Coemansia_reversa	81.4	2.1e-26
TRINITY_DN7716_c0_g3	PIA16906.1	ABC1-domain-containing protein [Coemansia reversa NRRL 1564]	Coemansia_reversa	48.8	1e-45
TRINITY_DN13499_c0_g1	RDW66653.1	alcohol dehydrogenase-1 [Coleophoma crateriformis]	Coleophoma_crateriformis	48.5	1.8e-77
TRINITY_DN14349_c1_g5	RDW83093.1	hypothetical protein BP5796_04584 [Coleophoma crateriformis]	Coleophoma_crateriformis	64.8	8.6e-10
TRINITY_DN13653_c0_g3	RDW66148.1	hypothetical protein BP6252_09783 [Coleophoma cylindrospora]	Coleophoma_cylindrospora	85.4	1.1e-42
TRINITY_DN14005_c0_g14	ELA25014.1	AAA family [Colletotrichum fructicola Nara gc5]	Colletotrichum_fructicola	48.4	1.5e-51
TRINITY_DN14601_c3_g7	EQB58530.1	hypothetical protein CGLO_01220 [Colletotrichum gloeosporioides Cg-14]	Colletotrichum_gloeosporioides	28.6	2.8e-06
TRINITY_DN2531_c0_g2	EQB57263.1	hypothetical protein CGLO_02630 [Colletotrichum gloeosporioides Cg-14]	Colletotrichum_gloeosporioides	43.8	2.2e-12
TRINITY_DN15463_c0_g1	XP_008094465.1	peroxidase [Colletotrichum graminicola M1.001]	Colletotrichum_graminicola	31.5	3.6e-10
TRINITY_DN14240_c0_g1	KZL79726.1	tpr domain protein, partial [Colletotrichum incanum]	Colletotrichum_incanum	69	6.9e-09
TRINITY_DN14228_c0_g2	AND77072.1	putrescine N-methyltransferase [Colletotrichum incarnatum]	Colletotrichum_incarnatum	67.3	1e-120
TRINITY_DN14590_c0_g5	ENH79846.1	multiple ankyrin repeats single kh domain-containing protein [Colletotrichum orbiculare MAFF 240422]	Colletotrichum_orbiculare	31.7	5.5e-07
TRINITY_DN586_c0_g1	ENH78557.1	ire protein kinase [Colletotrichum orbiculare MAFF 240422]	Colletotrichum_orbiculare	24.3	8.6e-10
TRINITY_DN9484_c1_g1	KDN70847.1	putative aldehyde dehydrogenase [Colletotrichum sublineola]	Colletotrichum_sublineola	57.1	2.1e-18
TRINITY_DN10019_c0_g1	KXN66960.1	Pkinase-domain-containing protein [Conidiobolus coronatus NRRL 28638]	Conidiobolus_coronatus	71.2	6.5e-26
TRINITY_DN11487_c0_g1	KXN72827.1	T-complex protein 1 subunit gamma [Conidiobolus coronatus NRRL 28638]	Conidiobolus_coronatus	73.3	4.2e-112
TRINITY_DN11487_c0_g2	KXN72827.1	T-complex protein 1 subunit gamma [Conidiobolus coronatus NRRL 28638]	Conidiobolus_coronatus	67.4	3.9e-64
TRINITY_DN13202_c0_g2	KXN67394.1	prohibitin Phb2 [Conidiobolus coronatus NRRL 28638]	Conidiobolus_coronatus	55.6	2.4e-26
TRINITY_DN14286_c1_g3	KXN64943.1	hypothetical protein CONCODRAFT_44889, partial [Conidiobolus coronatus NRRL 28638]	Conidiobolus_coronatus	50	5e-20
TRINITY_DN15419_c0_g1	KXN71109.1	ribosomal protein S25, partial [Conidiobolus coronatus NRRL 28638]	Conidiobolus_coronatus	71.8	2.4e-22
TRINITY_DN16014_c0_g1	KXN73907.1	ribosomal protein S12/S23 [Conidiobolus coronatus NRRL 28638]	Conidiobolus_coronatus	80.5	5.5e-51
TRINITY_DN16243_c0_g1	KXN69317.1	AMP deaminase [Conidiobolus coronatus NRRL 28638]	Conidiobolus_coronatus	49.8	1.6e-172
TRINITY_DN16919_c0_g1	KXN73052.1	ubiquinol-cytochrome c oxidoreductase [Conidiobolus coronatus NRRL 28638]	Conidiobolus_coronatus	45.2	1.2e-06
TRINITY_DN1735_c0_g1	KXN69992.1	60S ribosomal protein L17 [Conidiobolus coronatus NRRL 28638]	Conidiobolus_coronatus	60.5	1.2e-21
TRINITY_DN898_c0_g1	KXN75070.1	hypothetical protein CONCODRAFT_1866 [Conidiobolus coronatus NRRL 28638]	Conidiobolus_coronatus	45.1	2.6e-14
TRINITY_DN9171_c0_g1	KXN68827.1	farnesyl-diphosphate farnesyltransferase [Conidiobolus coronatus NRRL 28638]	Conidiobolus_coronatus	59.3	4.1e-45
TRINITY_DN9728_c0_g1	KXN74498.1	V-type ATPase [Conidiobolus coronatus NRRL 28638]	Conidiobolus_coronatus	95.2	1.2e-41
TRINITY_DN13536_c1_g3	YP_009558594.1	cytochrome c oxidase subunit 1 (mitochondrion) [Conidiobolus heterosporus]	Conidiobolus_heterosporus	63.2	3e-177
TRINITY_DN15781_c0_g1	YP_009558615.1	NADH dehydrogenase subunit 4 (mitochondrion) [Conidiobolus heterosporus]	Conidiobolus_heterosporus	36.8	2.1e-46
TRINITY_DN1730_c0_g1	YP_009558615.1	NADH dehydrogenase subunit 4 (mitochondrion) [Conidiobolus heterosporus]	Conidiobolus_heterosporus	36.1	5e-48
TRINITY_DN4134_c0_g1	OIW23465.1	ribosomal protein 60S [Coniochaeta ligniaria NRRL 30616]	Coniochaeta_ligniaria	61.5	3e-14
TRINITY_DN1747_c0_g1	RKU49663.1	hypothetical protein DL546_009763 [Coniochaeta pulveracea]	Coniochaeta_pulveracea	59.8	7.2e-33
TRINITY_DN11332_c0_g2	XP_007775251.1	hypothetical protein CONPUDRAFT_93823 [Coniophora puteana RWD-64-598 SS2]	Coniophora_puteana	94.3	3.8e-53
TRINITY_DN2060_c0_g1	XP_007766106.1	cytochrome-c from the OXPHOS pathway [Coniophora puteana RWD-64-598 SS2]	Coniophora_puteana	90.7	4e-53
TRINITY_DN10386_c0_g3	XP_007782278.1	hypothetical protein W97_06077 [Coniosporium apollinis CBS 100218]	Coniosporium_apollinis	34.1	2.1e-18
TRINITY_DN6338_c0_g1	XP_007779293.1	mannosyltransferase [Coniosporium apollinis CBS 100218]	Coniosporium_apollinis	74.5	6.7e-233
TRINITY_DN11313_c0_g1	XP_001832383.1	protein phosphatase type 1 [Coprinopsis cinerea okayama7#130]	Coprinopsis_cinerea	100	5.2e-88
TRINITY_DN13786_c1_g1	XP_001829644.1	histone 3 [Coprinopsis cinerea okayama7#130]	Coprinopsis_cinerea	90.5	3.3e-58
TRINITY_DN14424_c0_g1	XP_001828882.1	ubiquitin C [Coprinopsis cinerea okayama7#130]	Coprinopsis_cinerea	100	7.3e-93
TRINITY_DN15455_c0_g1	XP_001829580.1	ubiquitin-60S ribosomal protein L40 fusion protein [Coprinopsis cinerea okayama7#130]	Coprinopsis_cinerea	93.6	1.2e-52
TRINITY_DN14450_c1_g8	OAA79789.1	Ankyrin repeat-containing domain protein [Cordyceps confragosa RCEF 1005]	Cordyceps_confragosa	51.6	9.2e-06
TRINITY_DN15967_c0_g1	OAA76109.1	cellular retinoic acid binding protein [Cordyceps confragosa RCEF 1005]	Cordyceps_confragosa	40.2	1.1e-10
TRINITY_DN3747_c0_g1	XP_018708092.1	14-3-3 protein [Cordyceps fumosorosea ARSEF 2679]	Cordyceps_fumosorosea	79.8	6.4e-46
TRINITY_DN13373_c0_g3	ATY60031.1	ankyrin 2,3 unc44 [Cordyceps militaris]	Cordyceps_militaris	30.1	1.4e-06
TRINITY_DN16937_c0_g1	XP_006668013.1	ATP synthase delta chain, putative [Cordyceps militaris CM01]	Cordyceps_militaris	35.6	2.1e-15
TRINITY_DN12783_c0_g1	PSN63883.1	14 kDa subunit of cytochrome bd ubiquinol oxidase [Corynespora cassiicola Philippines]	Corynespora_cassiicola	46.4	1.2e-17
TRINITY_DN12783_c0_g2	PSN63883.1	14 kDa subunit of cytochrome bd ubiquinol oxidase [Corynespora cassiicola Philippines]	Corynespora_cassiicola	47.4	7.2e-18
TRINITY_DN14129_c0_g3	AAB84212.1	putative maturase (mitochondrion) [Cryphonectria parasitica]	Cryphonectria_parasitica	55.2	1.3e-13
TRINITY_DN14129_c0_g5	AAB84212.1	putative maturase (mitochondrion) [Cryphonectria parasitica]	Cryphonectria_parasitica	58.3	1e-90
TRINITY_DN14594_c1_g16	AMX22312.1	hypothetical protein (mitochondrion) [Cryphonectria parasitica]	Cryphonectria_parasitica	46.5	3.8e-20
TRINITY_DN14594_c1_g7	AMX22307.1	GIY-YIG endonuclease (mitochondrion) [Cryphonectria parasitica]	Cryphonectria_parasitica	46.2	2e-40
TRINITY_DN5988_c0_g1	AMX22255.1	GIY-YIG/LAGLIDADG endonuclease, partial (mitochondrion) [Cryphonectria parasitica]	Cryphonectria_parasitica	54.9	4.9e-24
TRINITY_DN13248_c0_g2	ODN87324.1	CK1/CK1/CK1-D protein kinase [Cryptococcus depauperatus CBS 7841]	Cryptococcus_depauperatus	72.2	3.6e-09
TRINITY_DN7793_c0_g1	KIR54292.1	cytochrome c oxidase subunit 5a [Cryptococcus gattii Ru294]	Cryptococcus_gattii_VGI	46	4.3e-20
TRINITY_DN13841_c0_g1	XP_570077.1	hypothetical protein CND04880 [Cryptococcus neoformans var. neoformans JEC21]	Cryptococcus_neoformans	45.3	3.9e-06
TRINITY_DN12242_c0_g1	XP_018278013.1	putative ras-related protein ypt1 [Cutaneotrichosporon oleaginosum]	Cutaneotrichosporon_oleaginosum	59.3	7.7e-19
TRINITY_DN5552_c0_g1	XP_018276278.1	ESCRT-II complex, vps25 subunit [Cutaneotrichosporon oleaginosum]	Cutaneotrichosporon_oleaginosum	39.5	6e-11
TRINITY_DN13778_c0_g2	CDR42340.1	CYFA0S09e01508g1_1 [Cyberlindnera fabianii]	Cyberlindnera_fabianii	81.2	2.6e-36
TRINITY_DN1832_c0_g1	CDR47082.1	CYFA0S28e00386g1_1 [Cyberlindnera fabianii]	Cyberlindnera_fabianii	25.2	2.1e-08
TRINITY_DN6027_c0_g1	CDR41815.1	CYFA0S08e00364g1_1 [Cyberlindnera fabianii]	Cyberlindnera_fabianii	38.3	8e-11
TRINITY_DN9207_c0_g1	CDR37721.1	CYFA0S01e15742g1_1 [Cyberlindnera fabianii]	Cyberlindnera_fabianii	72.4	1.3e-26
TRINITY_DN14183_c0_g1	XP_020073061.1	protein BMH2 [Cyberlindnera jadinii NRRL Y-1542]	Cyberlindnera_jadinii	59.8	3.3e-77
TRINITY_DN281_c0_g1	KIY69671.1	ras protein [Cylindrobasidium torrendii FP15055 ss-10]	Cylindrobasidium_torrendii	94.6	3.5e-68
TRINITY_DN9499_c0_g1	KIY65664.1	BAR-domain-containing protein [Cylindrobasidium torrendii FP15055 ss-10]	Cylindrobasidium_torrendii	26.3	3.4e-10
TRINITY_DN8675_c0_g2	XP_008718427.1	hypothetical protein HMPREF1541_05868 [Cyphellophora europaea CBS 101466]	Cyphellophora_europaea	50.7	5.6e-12
TRINITY_DN17001_c0_g1	ROW17319.1	hypothetical protein VPNG_01198 [Cytospora leucostoma]	Cytospora_leucostoma	53	1e-30
TRINITY_DN2265_c0_g1	ROV86456.1	hypothetical protein VPNG_10410 [Cytospora leucostoma]	Cytospora_leucostoma	80.1	3.5e-77
TRINITY_DN14769_c0_g1	EJU00994.1	40S ribosomal protein S27 [Dacryopinax primogenitus]	Dacryopinax_primogenitus	79.3	6e-31
TRINITY_DN16748_c0_g1	EPS35363.1	hypothetical protein H072_11274 [Dactylellina haptotyla CBS 200.50]	Dactylellina_haptotyla	53.6	2.3e-20
TRINITY_DN3820_c0_g1	EPS43595.1	hypothetical protein H072_2379 [Dactylellina haptotyla CBS 200.50]	Dactylellina_haptotyla	57.1	1.6e-09
TRINITY_DN4741_c0_g2	EPS38741.1	hypothetical protein H072_7492 [Dactylellina haptotyla CBS 200.50]	Dactylellina_haptotyla	53.1	5e-07
TRINITY_DN8060_c0_g1	EPS38865.1	hypothetical protein H072_7365 [Dactylellina haptotyla CBS 200.50]	Dactylellina_haptotyla	44.6	3.1e-51
TRINITY_DN7498_c0_g2	KZT73067.1	A1pp-domain-containing protein [Daedalea quercina L-15889]	Daedalea_quercina	62.2	1.3e-28
TRINITY_DN14410_c0_g6	OTB17939.1	hypothetical protein K445DRAFT_56595, partial [Daldinia sp. EC12]	Daldinia_sp._EC12	39.7	4.2e-10
TRINITY_DN4339_c0_g1	XP_460369.1	DEHA2F00176p [Debaryomyces hansenii CBS767]	Debaryomyces_hansenii	42.5	1.1e-23
TRINITY_DN14554_c0_g2	KKY31446.1	putative translation elongation factor 1 alpha [Diaporthe ampelina]	Diaporthe_ampelina	83.3	7.4e-228
TRINITY_DN13856_c0_g1	XP_007360006.1	hypothetical protein DICSQDRAFT_158296 [Dichomitus squalens LYAD-421 SS1]	Dichomitus_squalens	26.3	4.4e-16
TRINITY_DN11172_c0_g2	RKP35296.1	hypothetical protein BJ085DRAFT_39117 [Dimargaris cristalligena]	Dimargaris_cristalligena	76.5	2.1e-69
TRINITY_DN12055_c0_g1	RKP34810.1	DNAJ domain-containing protein Mas5 [Dimargaris cristalligena]	Dimargaris_cristalligena	75.8	1.1e-21
TRINITY_DN12354_c0_g1	RKP38036.1	RAB/GTPase protein [Dimargaris cristalligena]	Dimargaris_cristalligena	68.4	6.1e-37
TRINITY_DN12804_c0_g3	RKP38502.1	adiponectin receptor protein [Dimargaris cristalligena]	Dimargaris_cristalligena	46.8	6.8e-09
TRINITY_DN12_c0_g1	RKP34746.1	microtubial binding protein [Dimargaris cristalligena]	Dimargaris_cristalligena	55.4	2.9e-31
TRINITY_DN13124_c0_g1	RKP35085.1	ubiquitin-activating emzyme E1 [Dimargaris cristalligena]	Dimargaris_cristalligena	61	7e-07
TRINITY_DN13253_c0_g3	RKP34779.1	T-complex protein 1 subunit beta [Dimargaris cristalligena]	Dimargaris_cristalligena	70.1	3.5e-29
TRINITY_DN13271_c0_g1	RKP35056.1	nucleophile aminohydrolase [Dimargaris cristalligena]	Dimargaris_cristalligena	78.7	2.2e-78
TRINITY_DN13271_c0_g2	RKP35056.1	nucleophile aminohydrolase [Dimargaris cristalligena]	Dimargaris_cristalligena	74	2.2e-81
TRINITY_DN13649_c0_g1	RKP38906.1	ribosomal protein S11 [Dimargaris cristalligena]	Dimargaris_cristalligena	69.7	2.2e-55
TRINITY_DN13928_c0_g1	RKP40212.1	WD40-repeat-containing domain protein [Dimargaris cristalligena]	Dimargaris_cristalligena	82.8	3.1e-23
TRINITY_DN13981_c0_g3	RKP39551.1	transitional endoplasmic reticulum ATPase [Dimargaris cristalligena]	Dimargaris_cristalligena	64.4	1.4e-19
TRINITY_DN13995_c0_g4	RKP37632.1	MRG-domain-containing protein, partial [Dimargaris cristalligena]	Dimargaris_cristalligena	46	1.9e-16
TRINITY_DN13995_c0_g6	RKP37632.1	MRG-domain-containing protein, partial [Dimargaris cristalligena]	Dimargaris_cristalligena	43.1	2.6e-33
TRINITY_DN15389_c0_g1	RKP38996.1	60S ribosomal protein L10-A [Dimargaris cristalligena]	Dimargaris_cristalligena	74.4	4.7e-84
TRINITY_DN15639_c0_g1	RKP38906.1	ribosomal protein S11 [Dimargaris cristalligena]	Dimargaris_cristalligena	67.9	2.8e-55
TRINITY_DN16979_c0_g1	RKP38002.1	cytochrome c oxidase, subunit VIa [Dimargaris cristalligena]	Dimargaris_cristalligena	45.6	1.6e-11
TRINITY_DN2006_c0_g1	RKP39033.1	heat shock protein 90 [Dimargaris cristalligena]	Dimargaris_cristalligena	73	7.1e-32
TRINITY_DN2331_c0_g1	RKP33981.1	glycosyl hydrolases family 15-domain-containing protein, partial [Dimargaris cristalligena]	Dimargaris_cristalligena	27.8	1.3e-06
TRINITY_DN575_c0_g1	RKP37350.1	secE/sec61-gamma protein [Dimargaris cristalligena]	Dimargaris_cristalligena	68.4	6.2e-15
TRINITY_DN5859_c0_g1	RKP37111.1	40S ribosomal protein S5 [Dimargaris cristalligena]	Dimargaris_cristalligena	76.6	5.8e-83
TRINITY_DN6677_c0_g1	RKP37217.1	translation initiation factor eIF 4e-like domain-containing protein [Dimargaris cristalligena]	Dimargaris_cristalligena	51.4	1e-17
TRINITY_DN6686_c0_g1	RKP39041.1	Tim17/Tim22/Tim23/Pmp24 family-domain-containing protein [Dimargaris cristalligena]	Dimargaris_cristalligena	58.3	7.6e-27
TRINITY_DN8174_c0_g1	RKP40373.1	30S ribosomal protein S8e [Dimargaris cristalligena]	Dimargaris_cristalligena	84.5	1.2e-65
TRINITY_DN9637_c0_g1	RKP33230.1	60S ribosomal protein L10a [Dimargaris cristalligena]	Dimargaris_cristalligena	63.6	1.4e-28
TRINITY_DN11099_c0_g2	PBP26817.1	hypothetical protein BUE80_DR002249 [Diplocarpon rosae]	Diplocarpon_rosae	65.6	6.4e-37
TRINITY_DN11871_c0_g1	XP_020135680.1	tpr mlp1 mlp2-like protein [Diplodia corticola]	Diplodia_corticola	50.9	6e-32
TRINITY_DN15708_c0_g1	OMP81991.1	hypothetical protein BK809_0006300 [Diplodia seriata]	Diplodia_seriata	30.7	1.8e-17
TRINITY_DN10021_c0_g1	RHZ80649.1	hypothetical protein Glove_134g41 [Diversispora versiformis]	Diversispora_versiformis	30.9	5.9e-17
TRINITY_DN10090_c0_g2	RHZ79020.1	hypothetical protein Glove_152g39 [Diversispora versiformis]	Diversispora_versiformis	65.5	1.4e-24
TRINITY_DN10251_c0_g1	RHZ63166.1	hypothetical protein Glove_332g11 [Diversispora versiformis]	Diversispora_versiformis	83.7	9.9e-101
TRINITY_DN10518_c0_g1	RHZ75802.1	hypothetical protein Glove_209g175 [Diversispora versiformis]	Diversispora_versiformis	66.2	8e-81
TRINITY_DN10960_c0_g1	RHZ47633.1	hypothetical protein Glove_575g13 [Diversispora versiformis]	Diversispora_versiformis	80.6	2.5e-37
TRINITY_DN11088_c0_g3	RHZ85450.1	hypothetical protein Glove_65g84 [Diversispora versiformis]	Diversispora_versiformis	51.4	1.2e-12
TRINITY_DN11305_c0_g1	RHZ79063.1	hypothetical protein Glove_152g71 [Diversispora versiformis]	Diversispora_versiformis	36.5	4.5e-08
TRINITY_DN11781_c0_g2	RHZ79878.1	hypothetical protein Glove_140g166 [Diversispora versiformis]	Diversispora_versiformis	57.6	4.2e-39
TRINITY_DN11790_c0_g1	RHZ87721.1	hypothetical protein Glove_31g37 [Diversispora versiformis]	Diversispora_versiformis	71.7	1.1e-13
TRINITY_DN11802_c0_g1	RHZ75132.1	hypothetical protein Glove_217g19 [Diversispora versiformis]	Diversispora_versiformis	49.2	6.1e-29
TRINITY_DN12600_c0_g1	RHZ77049.1	hypothetical protein Glove_186g141 [Diversispora versiformis]	Diversispora_versiformis	38.4	3.3e-15
TRINITY_DN12656_c1_g3	RHZ76899.1	hypothetical protein Glove_187g104 [Diversispora versiformis]	Diversispora_versiformis	65.3	1.1e-07
TRINITY_DN12866_c0_g1	RHZ45503.1	hypothetical protein Glove_673g19 [Diversispora versiformis]	Diversispora_versiformis	67.7	2.7e-17
TRINITY_DN13041_c0_g2	RHZ56704.1	hypothetical protein Glove_397g4 [Diversispora versiformis]	Diversispora_versiformis	72.9	1.4e-39
TRINITY_DN13305_c0_g1	RHZ77808.1	hypothetical protein Glove_172g56 [Diversispora versiformis]	Diversispora_versiformis	46	2.2e-37
TRINITY_DN13511_c0_g2	RHZ45050.1	hypothetical protein Glove_692g8 [Diversispora versiformis]	Diversispora_versiformis	51.1	1.5e-40
TRINITY_DN13511_c0_g3	RHZ45050.1	hypothetical protein Glove_692g8 [Diversispora versiformis]	Diversispora_versiformis	32.5	6.2e-15
TRINITY_DN13647_c0_g4	RHZ80560.1	hypothetical protein Glove_134g152 [Diversispora versiformis]	Diversispora_versiformis	60.9	1.9e-69
TRINITY_DN13655_c0_g1	RHZ76797.1	hypothetical protein Glove_192g21 [Diversispora versiformis]	Diversispora_versiformis	57.3	1.1e-35
TRINITY_DN13717_c0_g1	RHZ46272.1	hypothetical protein Glove_627g30 [Diversispora versiformis]	Diversispora_versiformis	63.7	1.6e-44
TRINITY_DN13764_c0_g2	RHZ56704.1	hypothetical protein Glove_397g4 [Diversispora versiformis]	Diversispora_versiformis	67.9	8.7e-94
TRINITY_DN13873_c0_g2	RHZ57124.1	hypothetical protein Glove_393g6 [Diversispora versiformis]	Diversispora_versiformis	48.9	4.8e-18
TRINITY_DN13886_c1_g2	RHZ75028.1	hypothetical protein Glove_218g4 [Diversispora versiformis]	Diversispora_versiformis	43.9	8.2e-26
TRINITY_DN13886_c1_g4	RHZ75028.1	hypothetical protein Glove_218g4 [Diversispora versiformis]	Diversispora_versiformis	41.3	2.4e-17
TRINITY_DN14060_c0_g1	RHZ82543.1	hypothetical protein Glove_109g140 [Diversispora versiformis]	Diversispora_versiformis	63.1	6.4e-59
TRINITY_DN14060_c0_g2	RHZ82543.1	hypothetical protein Glove_109g140 [Diversispora versiformis]	Diversispora_versiformis	63.1	1.9e-58
TRINITY_DN14086_c3_g15	RHZ81809.1	hypothetical protein Glove_117g575 [Diversispora versiformis]	Diversispora_versiformis	86.1	2.9e-104
TRINITY_DN14086_c3_g7	RHZ81809.1	hypothetical protein Glove_117g575 [Diversispora versiformis]	Diversispora_versiformis	86.1	7.6e-104
TRINITY_DN14352_c0_g7	RHZ72473.1	hypothetical protein Glove_242g127 [Diversispora versiformis]	Diversispora_versiformis	50.5	2.3e-19
TRINITY_DN14448_c2_g2	RHZ75762.1	hypothetical protein Glove_209g114 [Diversispora versiformis]	Diversispora_versiformis	76.8	2.2e-23
TRINITY_DN14588_c1_g1	RHZ54173.1	hypothetical protein Glove_429g23 [Diversispora versiformis]	Diversispora_versiformis	92.6	3.6e-47
TRINITY_DN15240_c0_g1	RHZ84967.1	hypothetical protein Glove_74g45 [Diversispora versiformis]	Diversispora_versiformis	74.7	1.8e-33
TRINITY_DN15250_c0_g1	RHZ88156.1	hypothetical protein Glove_26g256 [Diversispora versiformis]	Diversispora_versiformis	47.5	4.6e-30
TRINITY_DN1525_c0_g1	RHZ82529.1	hypothetical protein Glove_109g87 [Diversispora versiformis]	Diversispora_versiformis	71.3	1.5e-57
TRINITY_DN15705_c0_g1	RHZ61197.1	hypothetical protein Glove_349g146 [Diversispora versiformis]	Diversispora_versiformis	31.7	4.5e-13
TRINITY_DN15713_c0_g1	RHZ76495.1	hypothetical protein Glove_197g46 [Diversispora versiformis]	Diversispora_versiformis	51.8	1.5e-21
TRINITY_DN16841_c0_g1	RHZ49337.1	hypothetical protein Glove_522g15 [Diversispora versiformis]	Diversispora_versiformis	54.8	3.9e-152
TRINITY_DN5491_c0_g1	RHZ52706.1	hypothetical protein Glove_458g2 [Diversispora versiformis]	Diversispora_versiformis	59.8	7.4e-35
TRINITY_DN9128_c0_g1	RHZ67019.1	hypothetical protein Glove_303g153 [Diversispora versiformis]	Diversispora_versiformis	68.7	8.3e-20
TRINITY_DN9128_c0_g2	RHZ67019.1	hypothetical protein Glove_303g153 [Diversispora versiformis]	Diversispora_versiformis	68.7	2.4e-19
TRINITY_DN9699_c0_g1	RHZ52797.1	hypothetical protein Glove_457g70 [Diversispora versiformis]	Diversispora_versiformis	70.2	4e-44
TRINITY_DN9710_c0_g1	RHZ74347.1	hypothetical protein Glove_226g30 [Diversispora versiformis]	Diversispora_versiformis	98	1.3e-24
TRINITY_DN1522_c0_g1	EME41775.1	hypothetical protein DOTSEDRAFT_73992 [Dothistroma septosporum NZE10]	Dothistroma_septosporum	52.1	5.5e-31
TRINITY_DN10173_c0_g1	KYK56675.1	importin beta-3 subunit [Drechmeria coniospora]	Drechmeria_coniospora	44.8	7.7e-10
TRINITY_DN14239_c1_g3	EWC46940.1	hypothetical protein DRE_03702 [Drechslerella stenobrocha 248]	Drechslerella_stenobrocha	40	5e-23
TRINITY_DN14464_c2_g10	RVD86851.1	hypothetical protein DFL_005105 [Duddingtonia flagrans]	Duddingtonia_flagrans	53.7	2e-11
TRINITY_DN14554_c0_g3	RVD89143.1	hypothetical protein DFL_000163 [Duddingtonia flagrans]	Duddingtonia_flagrans	77	2.6e-206
TRINITY_DN14554_c0_g4	RVD89143.1	hypothetical protein DFL_000163 [Duddingtonia flagrans]	Duddingtonia_flagrans	76.6	1.8e-204
TRINITY_DN14231_c0_g1	PSK46672.1	hypothetical protein B9Z65_1963 [Elsinoe australis]	Elsinoe_australis	100	3.8e-113
TRINITY_DN2817_c0_g1	PSK46672.1	hypothetical protein B9Z65_1963 [Elsinoe australis]	Elsinoe_australis	65.8	6.9e-33
TRINITY_DN4246_c0_g1	PSK58612.1	Isocitrate dehydrogenase [Elsinoe australis]	Elsinoe_australis	80.4	1.4e-38
TRINITY_DN14076_c2_g6	AAN78302.1	beta-tubulin, partial [Encephalitozoon intestinalis]	Encephalitozoon_intestinalis	83.5	8.2e-38
TRINITY_DN13613_c0_g1	XP_007805087.1	hypothetical protein EPUS_04034 [Endocarpon pusillum Z07020]	Endocarpon_pusillum	44.6	1.2e-36
TRINITY_DN11011_c0_g1	RUS22497.1	emp24/gp25L/p24 family/GOLD-domain-containing protein [Endogone sp. FLAS-F59071]	Endogone_sp._FLAS-F59071	48.7	1e-10
TRINITY_DN12694_c0_g1	RUS22816.1	hypothetical protein BC937DRAFT_86676 [Endogone sp. FLAS-F59071]	Endogone_sp._FLAS-F59071	40	6.1e-49
TRINITY_DN12919_c1_g1	RUS21863.1	putative histone-binding protein Caf1 [Endogone sp. FLAS-F59071]	Endogone_sp._FLAS-F59071	79.4	2.8e-28
TRINITY_DN13274_c0_g1	RUS16803.1	G subunit of NADH dehydrogenase [Endogone sp. FLAS-F59071]	Endogone_sp._FLAS-F59071	65.1	1.1e-78
TRINITY_DN13331_c0_g1	RUS17833.1	P-loop containing nucleoside triphosphate hydrolase protein, partial [Endogone sp. FLAS-F59071]	Endogone_sp._FLAS-F59071	48.6	1.1e-20
TRINITY_DN14293_c1_g8	RUS22816.1	hypothetical protein BC937DRAFT_86676 [Endogone sp. FLAS-F59071]	Endogone_sp._FLAS-F59071	36.3	7.5e-48
TRINITY_DN14831_c0_g1	RUS22218.1	lipoxygenase [Endogone sp. FLAS-F59071]	Endogone_sp._FLAS-F59071	25.3	5.4e-42
TRINITY_DN15379_c0_g1	RUS14415.1	E3 ubiquitin ligase complex SCF subunit sconC [Endogone sp. FLAS-F59071]	Endogone_sp._FLAS-F59071	61.9	2.9e-44
TRINITY_DN16250_c0_g1	RUS16331.1	NADPH:quinone reductase [Endogone sp. FLAS-F59071]	Endogone_sp._FLAS-F59071	36.9	5.9e-51
TRINITY_DN3425_c0_g1	RUS18569.1	UV excision repair protein rhp23 [Endogone sp. FLAS-F59071]	Endogone_sp._FLAS-F59071	53.4	4.4e-17
TRINITY_DN5378_c0_g1	RUS22089.1	NUDIX hydrolase domain-like protein [Endogone sp. FLAS-F59071]	Endogone_sp._FLAS-F59071	42.5	1.1e-12
TRINITY_DN10442_c0_g1	ORD92800.1	H2A [Enterospora canceri]	Enterospora_canceri	73.8	7.9e-41
TRINITY_DN14167_c0_g1	ORD93043.1	H3 [Enterospora canceri]	Enterospora_canceri	97.1	2.3e-64
TRINITY_DN14180_c0_g1	ORD93043.1	H3 [Enterospora canceri]	Enterospora_canceri	97.1	2.9e-64
TRINITY_DN15696_c0_g1	ORD92800.1	H2A [Enterospora canceri]	Enterospora_canceri	76.9	1.1e-41
TRINITY_DN16987_c0_g1	ORD93043.1	H3 [Enterospora canceri]	Enterospora_canceri	96.3	8.5e-64
TRINITY_DN5318_c0_g2	ADK37836.1	putative aspartic endopeptidase, partial [Entomophthora planchoniana]	Entomophthora_planchoniana	53	1.4e-27
TRINITY_DN14084_c2_g7	YP_009327802.1	hypothetical protein, partial (mitochondrion) [Epichloe typhina]	Epichloe_typhina	75.5	4.1e-15
TRINITY_DN1614_c0_g1	OSS47322.1	hypothetical protein B5807_09949 [Epicoccum nigrum]	Epicoccum_nigrum	35.9	3.9e-30
TRINITY_DN14115_c0_g1	XP_003646874.1	hypothetical protein Ecym_5295 [Eremothecium cymbalariae DBVPG#7215]	Eremothecium_cymbalariae	53.8	1.8e-15
TRINITY_DN10111_c0_g3	KHJ31808.1	putative nadp-dependent malic enzyme [Erysiphe necator]	Erysiphe_necator	32.7	1.2e-12
TRINITY_DN11623_c0_g2	POS82865.1	histone H3, partial [Erysiphe pulchra]	Erysiphe_pulchra	52.9	2.2e-08
TRINITY_DN14391_c1_g8	POS87902.1	ribosomal protein S5 [Erysiphe pulchra]	Erysiphe_pulchra	87.5	1.7e-14
TRINITY_DN14613_c0_g1	POS82547.1	hypothetical protein EPUL_004988, partial [Erysiphe pulchra]	Erysiphe_pulchra	30.2	3.2e-22
TRINITY_DN13108_c0_g1	EMR65616.1	putative small monomeric gtpase protein [Eutypa lata UCREL1]	Eutypa_lata	64.6	5.5e-23
TRINITY_DN16343_c0_g1	KZV80166.1	thioredoxin-domain-containing protein [Exidia glandulosa HHB12029]	Exidia_glandulosa	50	1.8e-21
TRINITY_DN13783_c0_g1	XP_013254292.1	hypothetical protein A1O9_12337 [Exophiala aquamarina CBS 119918]	Exophiala_aquamarina	47.7	1.7e-20
TRINITY_DN11876_c0_g2	XP_009153803.1	60S ribosomal protein L5 [Exophiala dermatitidis NIH/UT8656]	Exophiala_dermatitidis	48.4	2.4e-25
TRINITY_DN14594_c1_g5	XP_009161805.1	hypothetical protein HMPREF1120_11008 (mitochondrion) [Exophiala dermatitidis NIH/UT8656]	Exophiala_dermatitidis	84.1	7e-20
TRINITY_DN1668_c0_g1	XP_009161804.1	NADH-ubiquinone dehydrogenase sububit 3 (mitochondrion) [Exophiala dermatitidis NIH/UT8656]	Exophiala_dermatitidis	70.6	1.9e-18
TRINITY_DN10779_c0_g1	RVX69715.1	hypothetical protein B0A52_06359 [Exophiala mesophila]	Exophiala_mesophila	48.6	1.9e-20
TRINITY_DN8870_c0_g1	XP_016264213.1	glyceraldehyde-3-phosphate dehydrogenase [Exophiala oligosperma]	Exophiala_oligosperma	84.9	5e-28
TRINITY_DN14053_c0_g2	KIV85646.1	hsp90-like protein [Exophiala sideris]	Exophiala_sideris	79.5	2.6e-92
TRINITY_DN5316_c0_g2	XP_012185484.1	predicted protein [Fibroporia radiculosa]	Fibroporia_radiculosa	94.5	1.8e-33
TRINITY_DN14945_c0_g1	KZP24840.1	autophagy-like protein 8 precursor [Fibularhizoctonia sp. CBS 109695]	Fibularhizoctonia_sp._CBS_109695	99.2	2e-65
TRINITY_DN2731_c0_g1	KZP22613.1	aquaporin-like protein [Fibularhizoctonia sp. CBS 109695]	Fibularhizoctonia_sp._CBS_109695	42.6	3.1e-06
TRINITY_DN4679_c0_g1	KZP34064.1	hypothetical protein FIBSPDRAFT_211093 [Fibularhizoctonia sp. CBS 109695]	Fibularhizoctonia_sp._CBS_109695	43.5	9e-08
TRINITY_DN7428_c0_g1	KZP04572.1	NDUFB9, NADH-ubiquinone oxidoreductase [Fibularhizoctonia sp. CBS 109695]	Fibularhizoctonia_sp._CBS_109695	38.1	6.3e-08
TRINITY_DN13041_c0_g1	KIY51600.1	ribosomal protein S3Ae [Fistulina hepatica ATCC 64428]	Fistulina_hepatica	68.3	4.9e-41
TRINITY_DN7428_c0_g2	KIY46602.1	hypothetical protein FISHEDRAFT_47031 [Fistulina hepatica ATCC 64428]	Fistulina_hepatica	37.5	2.1e-07
TRINITY_DN16778_c0_g1	XP_007272073.1	ubiquitin-conjugating enzyme E2 [Fomitiporia mediterranea MF3/22]	Fomitiporia_mediterranea	90.2	2.9e-76
TRINITY_DN4777_c0_g1	XP_007261740.1	hypothetical protein FOMMEDRAFT_101216 [Fomitiporia mediterranea MF3/22]	Fomitiporia_mediterranea	78.3	1.3e-59
TRINITY_DN14118_c0_g4	EPT06059.1	hypothetical protein FOMPIDRAFT_1021155 [Fomitopsis pinicola FP-58527 SS1]	Fomitopsis_pinicola	90.9	1.6e-32
TRINITY_DN13890_c0_g1	XP_016630070.1	hypothetical protein Z520_08202 [Fonsecaea multimorphosa CBS 102226]	Fonsecaea_multimorphosa	25	8.1e-45
TRINITY_DN13383_c0_g3	XP_022494284.1	hypothetical protein AYO20_11491 [Fonsecaea nubica]	Fonsecaea_nubica	34.6	1.6e-09
TRINITY_DN13706_c0_g2	XP_013287459.1	serine/threonine-protein phosphatase PP1 [Fonsecaea pedrosoi CBS 271.37]	Fonsecaea_pedrosoi	88.5	4.7e-85
TRINITY_DN16659_c0_g1	GAW16028.1	hypothetical protein ANO14919_054500 [fungal sp. No.14919]	fungal_sp._No.14919	39.8	1.5e-21
TRINITY_DN12120_c0_g3	PVU99081.1	hypothetical protein BB559_001012 [Furculomyces boomerangus]	Furculomyces_boomerangus	58.1	4.5e-13
TRINITY_DN15582_c0_g1	PVU85658.1	hypothetical protein BB559_006889 [Furculomyces boomerangus]	Furculomyces_boomerangus	77.4	1.6e-34
TRINITY_DN3451_c0_g1	PVU91106.1	hypothetical protein BB559_004297 [Furculomyces boomerangus]	Furculomyces_boomerangus	56.2	7.6e-11
TRINITY_DN10498_c0_g2	RSM02946.1	hypothetical protein CDV31_010687 [Fusarium ambrosium]	Fusarium_ambrosium	25.2	5.7e-58
TRINITY_DN9251_c0_g1	KIL87680.1	rna-binding glycine-rich protein [Fusarium avenaceum]	Fusarium_avenaceum	63.5	2.6e-20
TRINITY_DN9076_c0_g1	RTE67826.1	4-hydroxy-3-methylbut-2-enyl diphosphate reductase 2 [Fusarium euwallaceae]	Fusarium_euwallaceae	34	1.6e-07
TRINITY_DN5128_c0_g1	XP_023428036.1	probable RPL39-60S large subunit ribosomal protein L39.e [Fusarium fujikuroi IMI 58289]	Fusarium_fujikuroi	92.7	7.5e-22
TRINITY_DN14044_c1_g7	CEF85879.1	unnamed protein product [Fusarium graminearum]	Fusarium_graminearum	76.2	2.2e-50
TRINITY_DN14084_c2_g11	DAC73639.1	TPA_asm: hypothetical protein (mitochondrion) [Fusarium graminearum]	Fusarium_graminearum	65.1	1.9e-274
TRINITY_DN11389_c0_g1	RMJ13232.1	hypothetical protein CDV36_007092 [Fusarium sp. AF-12]	Fusarium_kuroshium	63.2	9.4e-17
TRINITY_DN13972_c0_g2	EXK79410.1	hypothetical protein FOQG_15973 [Fusarium oxysporum f. sp. raphani 54005]	Fusarium_oxysporum	36.7	7.4e-21
TRINITY_DN3572_c0_g1	RKL18580.1	hypothetical protein BFJ72_g15225 [Fusarium proliferatum]	Fusarium_proliferatum	61.8	8.8e-07
TRINITY_DN7414_c0_g1	RKL41738.1	hypothetical protein BFJ72_g5078 [Fusarium proliferatum]	Fusarium_proliferatum	50	1.7e-08
TRINITY_DN10035_c0_g1	XP_009261474.1	hypothetical protein FPSE_10082 [Fusarium pseudograminearum CS3096]	Fusarium_pseudograminearum	30.4	8.3e-44
TRINITY_DN14084_c2_g1	YP_005088101.1	nad2-i1 gene product (mitochondrion) [Fusarium solani]	Fusarium_solani	49.3	1.3e-176
TRINITY_DN14129_c0_g18	YP_005088112.1	cox1-i3 gene product (mitochondrion) [Fusarium solani]	Fusarium_solani	51.3	2.5e-21
TRINITY_DN4917_c0_g2	RSL71758.1	hypothetical protein CEP53_001373 [Fusarium sp. AF-6]	Fusarium_sp._AF-6	63.6	2.1e-18
TRINITY_DN14173_c1_g4	RFN46271.1	phthalate 4,5-dioxygenase oxygenase reductase subunit [Fusarium sp. FIESC_12]	Fusarium_sp._FIESC_12	61.5	8.9e-28
TRINITY_DN14090_c1_g2	RBQ65642.1	hypothetical protein FVER14953_03560 [Fusarium verticillioides]	Fusarium_verticillioides	39.2	1.2e-15
TRINITY_DN14264_c2_g2	XP_009225708.1	protein disulfide-isomerase [Gaeumannomyces tritici R3-111a-1]	Gaeumannomyces_tritici	37	1.8e-48
TRINITY_DN1645_c0_g1	KDR73644.1	hypothetical protein GALMADRAFT_100460 [Galerina marginata CBS 339.88]	Galerina_marginata	91.1	2.7e-74
TRINITY_DN7515_c0_g1	KDR76344.1	hypothetical protein GALMADRAFT_247741 [Galerina marginata CBS 339.88]	Galerina_marginata	98.2	1.8e-45
TRINITY_DN9864_c0_g1	KDR81525.1	hypothetical protein GALMADRAFT_239530 [Galerina marginata CBS 339.88]	Galerina_marginata	91.2	4.7e-22
TRINITY_DN11812_c0_g1	PIL31704.1	transporter [Ganoderma sinense ZZ0214-1]	Ganoderma_sinense	60.3	3.5e-21
TRINITY_DN12989_c0_g2	EMD34108.1	hypothetical protein CERSUDRAFT_86861 [Gelatoporia subvermispora B]	Gelatoporia_subvermispora	66.7	3.2e-08
TRINITY_DN1755_c0_g1	EMD35173.1	hypothetical protein CERSUDRAFT_158009 [Gelatoporia subvermispora B]	Gelatoporia_subvermispora	43	6e-09
TRINITY_DN6764_c0_g1	EMD33918.1	serine/threonine specific protein phosphatase Sit4 [Gelatoporia subvermispora B]	Gelatoporia_subvermispora	100	1e-46
TRINITY_DN11594_c0_g6	CAJ77494.1	monosaccharide transporter [Geosiphon pyriformis]	Geosiphon_pyriformis	47.6	3.5e-11
TRINITY_DN13666_c0_g1	CDO51906.1	similar to Saccharomyces cerevisiae YOR298C-A MBF1 Transcriptional coactivator that bridges the DNA-binding region of Gcn4p and TATA-binding protein Spt15p [Geotrichum candidum]	Geotrichum_candidum	59	2e-31
TRINITY_DN14109_c1_g1	CDO57153.1	similar to Saccharomyces cerevisiae YMR072W ABF2 Mitochondrial DNA-binding protein, involved in mitochondrial DNA replication and recombination and member of HMG1 DNA-binding protein family [Geotrichum candidum]	Geotrichum_candidum	32.8	4.6e-11
TRINITY_DN14418_c2_g2	CDO55796.1	similar to Saccharomyces cerevisiae YJL167W ERG20 Farnesyl pyrophosphate synthetase [Geotrichum candidum]	Geotrichum_candidum	53.9	2.7e-89
TRINITY_DN2605_c0_g1	CDO56363.1	similar to Saccharomyces cerevisiae YBR189W RPS9B Protein component of the small (40S) ribosomal subunit,nearly identical to Rps9Ap [Geotrichum candidum]	Geotrichum_candidum	85	4.1e-31
TRINITY_DN3739_c0_g1	CDO58075.1	similar to Saccharomyces cerevisiae YLL050C COF1 Cofilin, involved in pH-dependent actin filament depolarization [Geotrichum candidum]	Geotrichum_candidum	47.7	1.1e-27
TRINITY_DN9122_c0_g2	CDO51313.1	similar to Saccharomyces cerevisiae YBR082C UBC4 Ubiquitin-conjugating enzyme (E2) [Geotrichum candidum]	Geotrichum_candidum	89.7	2.1e-29
TRINITY_DN10208_c0_g1	RIB18000.1	hypothetical protein C2G38_1967722 [Gigaspora rosea]	Gigaspora_rosea	38.9	3.4e-33
TRINITY_DN12761_c0_g4	RIB05788.1	glutamine synthetase [Gigaspora rosea]	Gigaspora_rosea	68.9	4.2e-77
TRINITY_DN12761_c0_g5	RIB08118.1	glutamine synthetase [Gigaspora rosea]	Gigaspora_rosea	63.4	1.9e-136
TRINITY_DN1324_c0_g1	RIB14230.1	hypothetical protein C2G38_2248372 [Gigaspora rosea]	Gigaspora_rosea	65.6	5.9e-31
TRINITY_DN13327_c1_g2	RIB02158.1	hypothetical protein C2G38_1991759 [Gigaspora rosea]	Gigaspora_rosea	60.8	2.5e-25
TRINITY_DN13327_c1_g3	RIB02158.1	hypothetical protein C2G38_1991759 [Gigaspora rosea]	Gigaspora_rosea	62.7	3.6e-50
TRINITY_DN13404_c0_g3	RIB28769.1	chaperonin Cpn60/TCP-1 family [Gigaspora rosea]	Gigaspora_rosea	75.7	1.7e-37
TRINITY_DN13404_c0_g4	RIB28769.1	chaperonin Cpn60/TCP-1 family [Gigaspora rosea]	Gigaspora_rosea	71.1	1.5e-29
TRINITY_DN13451_c0_g1	RIB17435.1	WD40-repeat-containing domain protein [Gigaspora rosea]	Gigaspora_rosea	58.9	4.1e-13
TRINITY_DN13647_c0_g1	RIB20945.1	Mu homology domain-containing protein [Gigaspora rosea]	Gigaspora_rosea	50.5	6.8e-20
TRINITY_DN13792_c0_g3	RIB23484.1	hypothetical protein C2G38_2171226 [Gigaspora rosea]	Gigaspora_rosea	33.3	6.7e-07
TRINITY_DN13827_c0_g1	RIB11450.1	60S ribosomal protein L20A [Gigaspora rosea]	Gigaspora_rosea	60.7	2.2e-56
TRINITY_DN14056_c0_g1	RIB05147.1	mitochondrial phosphate carrier protein [Gigaspora rosea]	Gigaspora_rosea	60.7	1.1e-95
TRINITY_DN14220_c0_g1	RIB21285.1	putative 40S ribosomal protein S3 [Gigaspora rosea]	Gigaspora_rosea	79.8	6e-100
TRINITY_DN14264_c0_g2	RIB02001.1	thioredoxin-like protein [Gigaspora rosea]	Gigaspora_rosea	42.6	3.7e-09
TRINITY_DN14286_c1_g1	RIB24818.1	Na/K ATPase alpha 1 subunit [Gigaspora rosea]	Gigaspora_rosea	40.1	1.1e-72
TRINITY_DN14753_c0_g1	RIB18000.1	hypothetical protein C2G38_1967722 [Gigaspora rosea]	Gigaspora_rosea	42.8	4.2e-41
TRINITY_DN14771_c0_g1	RIB09751.1	ribosomal protein S13 [Gigaspora rosea]	Gigaspora_rosea	71.1	2.1e-57
TRINITY_DN15094_c0_g1	RIB09819.1	60S ribosomal protein L17 [Gigaspora rosea]	Gigaspora_rosea	69.9	1.2e-54
TRINITY_DN15182_c0_g1	RIB07396.1	UBC-like protein [Gigaspora rosea]	Gigaspora_rosea	66.7	3.5e-52
TRINITY_DN16177_c0_g1	RIB03700.1	60S ribosomal protein L14e [Gigaspora rosea]	Gigaspora_rosea	47.5	5.5e-24
TRINITY_DN1856_c0_g1	RIB13152.1	alpha-helical ferredoxin [Gigaspora rosea]	Gigaspora_rosea	73.7	1.8e-108
TRINITY_DN1932_c0_g1	RIB12505.1	Nucleolar GTP-binding protein 2 [Gigaspora rosea]	Gigaspora_rosea	55.7	6.2e-143
TRINITY_DN2020_c0_g1	RIB13482.1	Rieske [2Fe-2S] iron-sulfur domain-containing protein [Gigaspora rosea]	Gigaspora_rosea	59.5	2.3e-62
TRINITY_DN4955_c0_g2	RIB09256.1	ubiquitin-conjugating enzyme/RWD-like protein [Gigaspora rosea]	Gigaspora_rosea	57	4.3e-48
TRINITY_DN5281_c0_g1	RIB02019.1	microsomal signal peptidase 12kDa subunit [Gigaspora rosea]	Gigaspora_rosea	46.4	1.2e-12
TRINITY_DN5281_c0_g2	RIB02019.1	microsomal signal peptidase 12kDa subunit [Gigaspora rosea]	Gigaspora_rosea	46.6	1.2e-10
TRINITY_DN596_c0_g1	RIB18356.1	PRA1 family protein [Gigaspora rosea]	Gigaspora_rosea	36	6.7e-18
TRINITY_DN6176_c0_g1	RIB17899.1	STIP1 homology and U box-containing protein 1-like protein [Gigaspora rosea]	Gigaspora_rosea	36.4	1e-09
TRINITY_DN13027_c0_g1	EHL03488.1	putative Uncharacterized WD repeat-containing protein C9G1.05 [Glarea lozoyensis 74030]	Glarea_lozoyensis	37.3	8.4e-06
TRINITY_DN14340_c0_g1	XP_008076818.1	UBC-like protein [Glarea lozoyensis ATCC 20868]	Glarea_lozoyensis	84.5	1.4e-72
TRINITY_DN12149_c0_g1	XP_007862083.1	eukaryotic translation initiation factor 3, subunit 7 [Gloeophyllum trabeum ATCC 11539]	Gloeophyllum_trabeum	59.4	6.9e-27
TRINITY_DN14265_c0_g1	XP_007862256.1	DNA damage checkpoint protein rad24 [Gloeophyllum trabeum ATCC 11539]	Gloeophyllum_trabeum	83.1	1.1e-104
TRINITY_DN7395_c0_g1	XP_007867121.1	hypothetical protein GLOTRDRAFT_139354 [Gloeophyllum trabeum ATCC 11539]	Gloeophyllum_trabeum	53	2.9e-31
TRINITY_DN8064_c1_g1	XP_007868786.1	cytochrome c C1 [Gloeophyllum trabeum ATCC 11539]	Gloeophyllum_trabeum	74.5	1.4e-38
TRINITY_DN950_c0_g1	XP_007861129.1	40S ribosomal protein S24 [Gloeophyllum trabeum ATCC 11539]	Gloeophyllum_trabeum	63.6	5.4e-16
TRINITY_DN10920_c0_g1	RIA97788.1	mitogen-activated protein-binding protein-interacting protein [Glomus cerebriforme]	Glomus_cerebriforme	61.1	4.5e-17
TRINITY_DN11445_c0_g1	RIA87916.1	peptidase M24, structural domain-containing protein [Glomus cerebriforme]	Glomus_cerebriforme	83.5	3.1e-41
TRINITY_DN11680_c0_g1	RIA96929.1	26S protease regulatory subunit 7 [Glomus cerebriforme]	Glomus_cerebriforme	76.6	3.8e-26
TRINITY_DN11926_c0_g2	RIA85694.1	nucleophile aminohydrolase [Glomus cerebriforme]	Glomus_cerebriforme	57.2	6.6e-54
TRINITY_DN12532_c0_g3	RIA79853.1	WD40-repeat-containing domain protein [Glomus cerebriforme]	Glomus_cerebriforme	63.4	1.3e-17
TRINITY_DN12656_c1_g4	RIA82556.1	eukaryotic translation initiation factor 3 domain-containing protein [Glomus cerebriforme]	Glomus_cerebriforme	38.6	1.3e-23
TRINITY_DN12819_c0_g1	RIA98988.1	coatomer WD associated region-domain-containing protein [Glomus cerebriforme]	Glomus_cerebriforme	55.7	7e-23
TRINITY_DN12895_c0_g1	RIA87612.1	ribosomal S13/S15 N-terminal domain-containing protein [Glomus cerebriforme]	Glomus_cerebriforme	85.2	5.1e-67
TRINITY_DN12895_c0_g2	RIA87612.1	ribosomal S13/S15 N-terminal domain-containing protein [Glomus cerebriforme]	Glomus_cerebriforme	85.2	5.1e-67
TRINITY_DN13143_c0_g2	RIA94596.1	inhibitor of apoptosis-promoting Bax1-domain-containing protein [Glomus cerebriforme]	Glomus_cerebriforme	34.2	2.4e-08
TRINITY_DN13181_c0_g2	RIA88790.1	elongation factor 1-beta [Glomus cerebriforme]	Glomus_cerebriforme	67.1	5.8e-57
TRINITY_DN13245_c0_g3	RIA95012.1	hypothetical protein C1645_734374 [Glomus cerebriforme]	Glomus_cerebriforme	40.2	2.7e-16
TRINITY_DN13305_c0_g2	RIA94460.1	maintenance of mitochondrial structure and function-domain-containing protein [Glomus cerebriforme]	Glomus_cerebriforme	49.6	5.2e-22
TRINITY_DN13662_c0_g1	RIA95760.1	hypothetical protein C1645_756695 [Glomus cerebriforme]	Glomus_cerebriforme	48.8	1e-10
TRINITY_DN13662_c0_g2	RIA95760.1	hypothetical protein C1645_756695 [Glomus cerebriforme]	Glomus_cerebriforme	48.8	1.5e-10
TRINITY_DN13700_c0_g1	RIA98035.1	ribosomal protein L19/L19e domain-containing protein [Glomus cerebriforme]	Glomus_cerebriforme	77.2	1.4e-62
TRINITY_DN13700_c0_g2	RIA98035.1	ribosomal protein L19/L19e domain-containing protein [Glomus cerebriforme]	Glomus_cerebriforme	77.2	1.4e-62
TRINITY_DN13822_c0_g1	RIA87648.1	hypothetical protein C1645_776824 [Glomus cerebriforme]	Glomus_cerebriforme	49.2	2.5e-26
TRINITY_DN13833_c0_g1	RIA94596.1	inhibitor of apoptosis-promoting Bax1-domain-containing protein [Glomus cerebriforme]	Glomus_cerebriforme	37.1	1.1e-28
TRINITY_DN13902_c0_g2	RIA78842.1	serine/threonine-protein phosphatase PP2A catalytic subunit [Glomus cerebriforme]	Glomus_cerebriforme	92.3	1.4e-132
TRINITY_DN13981_c0_g1	RIA87139.1	transitional endoplasmic reticulum ATPase [Glomus cerebriforme]	Glomus_cerebriforme	77.4	2.8e-180
TRINITY_DN14418_c2_g4	RIA84110.1	farnesyl pyrophosphate synthase [Glomus cerebriforme]	Glomus_cerebriforme	64.8	1.1e-22
TRINITY_DN14452_c1_g1	RIA91200.1	hypothetical protein C1645_822358 [Glomus cerebriforme]	Glomus_cerebriforme	38.8	9.8e-17
TRINITY_DN14467_c0_g1	RIA88208.1	heat shock protein 70 family [Glomus cerebriforme]	Glomus_cerebriforme	70	1.6e-249
TRINITY_DN14486_c0_g2	RIA79046.1	cell wall-associated hydrolase [Glomus cerebriforme]	Glomus_cerebriforme	73.4	9.7e-15
TRINITY_DN14520_c0_g2	RIA79045.1	hypothetical protein C1645_133682 [Glomus cerebriforme]	Glomus_cerebriforme	68.5	2.2e-10
TRINITY_DN14603_c2_g2	RIA79096.1	hypothetical protein C1645_794897 [Glomus cerebriforme]	Glomus_cerebriforme	68.9	3.5e-32
TRINITY_DN14604_c0_g1	RIA79046.1	cell wall-associated hydrolase [Glomus cerebriforme]	Glomus_cerebriforme	75.5	1.8e-35
TRINITY_DN14604_c0_g2	RIA79046.1	cell wall-associated hydrolase [Glomus cerebriforme]	Glomus_cerebriforme	69.7	2.8e-14
TRINITY_DN15062_c0_g1	RIA85336.1	40S ribosomal protein S23 [Glomus cerebriforme]	Glomus_cerebriforme	81.7	6.6e-60
TRINITY_DN15090_c0_g1	RIA81134.1	HSP20-like chaperone, partial [Glomus cerebriforme]	Glomus_cerebriforme	36.8	6.5e-07
TRINITY_DN15190_c0_g1	RIA89436.1	ribosomal protein S26e [Glomus cerebriforme]	Glomus_cerebriforme	77.6	4.8e-37
TRINITY_DN16607_c0_g1	RIA98693.1	thioredoxin-like protein [Glomus cerebriforme]	Glomus_cerebriforme	52.4	3.2e-18
TRINITY_DN2790_c0_g1	RIA81631.1	hypothetical protein C1645_665560, partial [Glomus cerebriforme]	Glomus_cerebriforme	59.1	6.9e-24
TRINITY_DN3362_c0_g1	RIA91310.1	SAM-dependent methyltransferase [Glomus cerebriforme]	Glomus_cerebriforme	59.7	8.3e-21
TRINITY_DN3512_c0_g1	RIA92607.1	60S ribosomal protein L3 [Glomus cerebriforme]	Glomus_cerebriforme	72.5	8.8e-80
TRINITY_DN4464_c0_g1	RIA96422.1	ferrochelatase, mitochondrial-like protein [Glomus cerebriforme]	Glomus_cerebriforme	50.6	4.6e-17
TRINITY_DN530_c0_g1	RIA99705.1	NADH ubiquinone oxidoreductase subunit NDUFA12-domain-containing protein [Glomus cerebriforme]	Glomus_cerebriforme	41.3	5.2e-21
TRINITY_DN5452_c0_g1	RIA91262.1	Pre-mRNA-splicing factor Cwf15/Cwc15 [Glomus cerebriforme]	Glomus_cerebriforme	55.3	4.5e-20
TRINITY_DN5505_c0_g1	RIA87970.1	WD40-repeat-containing domain protein [Glomus cerebriforme]	Glomus_cerebriforme	77.4	1.4e-51
TRINITY_DN7567_c0_g1	RIA96014.1	DAD/Ost2 [Glomus cerebriforme]	Glomus_cerebriforme	58.3	7.6e-21
TRINITY_DN7567_c0_g2	RIA96014.1	DAD/Ost2 [Glomus cerebriforme]	Glomus_cerebriforme	60.2	3.1e-29
TRINITY_DN911_c0_g1	RIA82197.1	aquaporin-like protein [Glomus cerebriforme]	Glomus_cerebriforme	38.2	1.9e-25
TRINITY_DN9674_c0_g1	RIA98718.1	ribonucleo protein LSM domain-containing protein [Glomus cerebriforme]	Glomus_cerebriforme	64.5	3.2e-22
TRINITY_DN14236_c0_g3	OCL12159.1	hypothetical protein AOQ84DRAFT_420820 [Glonium stellatum]	Glonium_stellatum	38.1	9.6e-10
TRINITY_DN14314_c0_g23	OCL12008.1	cbxX protein [Glonium stellatum]	Glonium_stellatum	39	1.5e-98
TRINITY_DN7473_c0_g1	OCL11174.1	hypothetical protein AOQ84DRAFT_287775 [Glonium stellatum]	Glonium_stellatum	40.3	5.7e-66
TRINITY_DN4871_c0_g1	RKF59327.1	FUN14 domain-containing protein 1B, partial [Golovinomyces cichoracearum]	Golovinomyces_cichoracearum	44.4	2.2e-07
TRINITY_DN10129_c0_g1	KXS13513.1	arginine decarboxylase [Gonapodya prolifera JEL478]	Gonapodya_prolifera	46.8	3.8e-17
TRINITY_DN10370_c0_g1	KXS18809.1	3-ketoacyl-CoA thiolase [Gonapodya prolifera JEL478]	Gonapodya_prolifera	77.4	1.5e-13
TRINITY_DN10492_c0_g1	KXS12332.1	the Annexin Xii hexamer [Gonapodya prolifera JEL478]	Gonapodya_prolifera	39.2	4e-48
TRINITY_DN10492_c0_g2	KXS12332.1	the Annexin Xii hexamer [Gonapodya prolifera JEL478]	Gonapodya_prolifera	39.6	4.7e-49
TRINITY_DN11083_c0_g1	KXS13943.1	PLP-dependent transferase [Gonapodya prolifera JEL478]	Gonapodya_prolifera	57.3	4e-59
TRINITY_DN11295_c0_g2	KXS19612.1	Aldedh-domain-containing protein [Gonapodya prolifera JEL478]	Gonapodya_prolifera	71.4	3.7e-06
TRINITY_DN11396_c0_g1	KXS20326.1	TMS membrane protein/tumor differentially expressed protein [Gonapodya prolifera JEL478]	Gonapodya_prolifera	46.2	2.2e-14
TRINITY_DN11581_c0_g1	KXS19199.1	hypothetical protein M427DRAFT_109051 [Gonapodya prolifera JEL478]	Gonapodya_prolifera	73.8	7.9e-47
TRINITY_DN11693_c0_g2	KXS09180.1	proteasome-domain-containing protein [Gonapodya prolifera JEL478]	Gonapodya_prolifera	69	7.5e-72
TRINITY_DN11812_c0_g2	KXS17372.1	hypothetical protein M427DRAFT_260238 [Gonapodya prolifera JEL478]	Gonapodya_prolifera	72.3	4.1e-47
TRINITY_DN11822_c0_g1	KXS20006.1	serine-tRNA ligase [Gonapodya prolifera JEL478]	Gonapodya_prolifera	58.9	5.6e-28
TRINITY_DN11926_c0_g1	KXS12385.1	putative proteasome subunit beta type 1 [Gonapodya prolifera JEL478]	Gonapodya_prolifera	59.3	5.9e-65
TRINITY_DN12031_c0_g1	KXS10583.1	SPC25-domain-containing protein [Gonapodya prolifera JEL478]	Gonapodya_prolifera	29.8	1.6e-07
TRINITY_DN12135_c0_g1	KXS11742.1	ribosomal protein L34e [Gonapodya prolifera JEL478]	Gonapodya_prolifera	63.9	9.7e-15
TRINITY_DN13002_c0_g1	KXS17532.1	hypothetical protein M427DRAFT_121931 [Gonapodya prolifera JEL478]	Gonapodya_prolifera	79.7	3.3e-33
TRINITY_DN13052_c0_g2	KXS15864.1	thioredoxin-like protein [Gonapodya prolifera JEL478]	Gonapodya_prolifera	68.7	1e-39
TRINITY_DN13180_c0_g1	KXS15265.1	ribosomal protein S13p/S18e [Gonapodya prolifera JEL478]	Gonapodya_prolifera	81.2	8.5e-68
TRINITY_DN13180_c0_g2	KXS15265.1	ribosomal protein S13p/S18e [Gonapodya prolifera JEL478]	Gonapodya_prolifera	81.2	1.1e-67
TRINITY_DN13211_c0_g1	KXS20099.1	glutaredoxin [Gonapodya prolifera JEL478]	Gonapodya_prolifera	42.9	1.5e-10
TRINITY_DN13431_c0_g2	KXS16051.1	aldehyde dehydrogenase [Gonapodya prolifera JEL478]	Gonapodya_prolifera	61.2	1.7e-16
TRINITY_DN13702_c0_g1	KXS21691.1	nascent polypeptide-associated complex, alpha subunit [Gonapodya prolifera JEL478]	Gonapodya_prolifera	61.1	8.4e-35
TRINITY_DN13702_c0_g2	KXS21691.1	nascent polypeptide-associated complex, alpha subunit [Gonapodya prolifera JEL478]	Gonapodya_prolifera	60.1	1.1e-36
TRINITY_DN13867_c0_g1	KXS15385.1	ribosomal protein S2 [Gonapodya prolifera JEL478]	Gonapodya_prolifera	61.6	4.5e-84
TRINITY_DN13867_c0_g2	KXS15385.1	ribosomal protein S2 [Gonapodya prolifera JEL478]	Gonapodya_prolifera	61.2	1.3e-83
TRINITY_DN13960_c0_g1	KXS20100.1	hypothetical protein M427DRAFT_41442 [Gonapodya prolifera JEL478]	Gonapodya_prolifera	32.1	5e-19
TRINITY_DN15151_c0_g1	KXS11545.1	60S ribosomal protein L7 [Gonapodya prolifera JEL478]	Gonapodya_prolifera	60.9	2.2e-69
TRINITY_DN200_c0_g1	KXS20873.1	clathrin adaptor, mu subunit [Gonapodya prolifera JEL478]	Gonapodya_prolifera	54	9.6e-21
TRINITY_DN2232_c0_g1	KXS11742.1	ribosomal protein L34e [Gonapodya prolifera JEL478]	Gonapodya_prolifera	64.3	6.6e-30
TRINITY_DN3955_c0_g1	KXS18629.1	ribosomal protein S19e, partial [Gonapodya prolifera JEL478]	Gonapodya_prolifera	59.1	2e-22
TRINITY_DN4216_c0_g2	KXS12332.1	the Annexin Xii hexamer [Gonapodya prolifera JEL478]	Gonapodya_prolifera	32.4	4.1e-37
TRINITY_DN5062_c0_g1	KXS13513.1	arginine decarboxylase [Gonapodya prolifera JEL478]	Gonapodya_prolifera	37.2	1.2e-06
TRINITY_DN5887_c0_g1	KXS13315.1	acylphosphatase-1-like protein [Gonapodya prolifera JEL478]	Gonapodya_prolifera	57.6	2.3e-21
TRINITY_DN7026_c0_g2	KXS12627.1	hypothetical protein M427DRAFT_502178, partial [Gonapodya prolifera JEL478]	Gonapodya_prolifera	36.8	5.8e-10
TRINITY_DN7548_c0_g2	KXS13668.1	EF1G-domain-containing protein [Gonapodya prolifera JEL478]	Gonapodya_prolifera	48.9	1.1e-17
TRINITY_DN8382_c0_g1	KXS21230.1	ATPase, V1/A1 complex, subunit E [Gonapodya prolifera JEL478]	Gonapodya_prolifera	49.2	4.6e-19
TRINITY_DN8772_c0_g1	KXS16097.1	ribosomal protein rps3 [Gonapodya prolifera JEL478]	Gonapodya_prolifera	68.5	2.8e-26
TRINITY_DN9703_c0_g1	KXS13850.1	threonyl-tRNA synthetase [Gonapodya prolifera JEL478]	Gonapodya_prolifera	71.8	1.5e-24
TRINITY_DN14603_c2_g5	OBZ63473.1	hypothetical protein A0H81_15005 [Grifola frondosa]	Grifola_frondosa	51.2	7.9e-29
TRINITY_DN13616_c0_g1	PPQ73749.1	hypothetical protein CVT26_011869 [Gymnopilus dilepis]	Gymnopilus_dilepis	92	2.2e-38
TRINITY_DN16070_c0_g1	PPQ77971.1	hypothetical protein CVT26_005276 [Gymnopilus dilepis]	Gymnopilus_dilepis	96.8	2.5e-62
TRINITY_DN5082_c0_g1	PPQ70972.1	hypothetical protein CVT26_014238 [Gymnopilus dilepis]	Gymnopilus_dilepis	69	1.5e-21
TRINITY_DN10020_c0_g1	KIK69004.1	hypothetical protein GYMLUDRAFT_80382 [Gymnopus luxurians FD-317 M1]	Gymnopus_luxurians	98.2	1.3e-56
TRINITY_DN10120_c0_g2	KIK64991.1	hypothetical protein GYMLUDRAFT_39402 [Gymnopus luxurians FD-317 M1]	Gymnopus_luxurians	85.8	1.9e-58
TRINITY_DN1022_c0_g1	KIK64209.1	hypothetical protein GYMLUDRAFT_40498 [Gymnopus luxurians FD-317 M1]	Gymnopus_luxurians	76.9	4.5e-131
TRINITY_DN10233_c0_g1	KIK63629.1	hypothetical protein GYMLUDRAFT_241550 [Gymnopus luxurians FD-317 M1]	Gymnopus_luxurians	98.5	5.1e-109
TRINITY_DN10539_c0_g1	KIK59153.1	hypothetical protein GYMLUDRAFT_44905 [Gymnopus luxurians FD-317 M1]	Gymnopus_luxurians	69.9	2.8e-47
TRINITY_DN10544_c0_g1	KIK68892.1	hypothetical protein GYMLUDRAFT_236781 [Gymnopus luxurians FD-317 M1]	Gymnopus_luxurians	100	3.5e-34
TRINITY_DN10664_c0_g1	KIK69091.1	hypothetical protein GYMLUDRAFT_188580, partial [Gymnopus luxurians FD-317 M1]	Gymnopus_luxurians	74.6	1.9e-19
TRINITY_DN10748_c0_g1	KIK69608.1	hypothetical protein GYMLUDRAFT_33984 [Gymnopus luxurians FD-317 M1]	Gymnopus_luxurians	88.3	1.8e-95
TRINITY_DN11057_c0_g1	KIK64598.1	hypothetical protein GYMLUDRAFT_39635 [Gymnopus luxurians FD-317 M1]	Gymnopus_luxurians	93.9	3.4e-55
TRINITY_DN1114_c0_g1	KIK59659.1	hypothetical protein GYMLUDRAFT_44096 [Gymnopus luxurians FD-317 M1]	Gymnopus_luxurians	86.7	8e-29
TRINITY_DN11173_c0_g1	KIK54931.1	hypothetical protein GYMLUDRAFT_48313 [Gymnopus luxurians FD-317 M1]	Gymnopus_luxurians	72.7	3.4e-87
TRINITY_DN11255_c0_g2	KIK63266.1	hypothetical protein GYMLUDRAFT_72007 [Gymnopus luxurians FD-317 M1]	Gymnopus_luxurians	81.6	2.1e-32
TRINITY_DN11375_c0_g1	KIK66665.1	hypothetical protein GYMLUDRAFT_238912 [Gymnopus luxurians FD-317 M1]	Gymnopus_luxurians	67.3	4.2e-31
TRINITY_DN11391_c0_g1	KIK59790.1	hypothetical protein GYMLUDRAFT_44247 [Gymnopus luxurians FD-317 M1]	Gymnopus_luxurians	52.5	3.6e-14
TRINITY_DN11413_c0_g1	KIK51618.1	hypothetical protein GYMLUDRAFT_50435 [Gymnopus luxurians FD-317 M1]	Gymnopus_luxurians	58.6	3.6e-12
TRINITY_DN11450_c0_g1	KIK56145.1	hypothetical protein GYMLUDRAFT_47354 [Gymnopus luxurians FD-317 M1]	Gymnopus_luxurians	64.1	6.8e-72
TRINITY_DN11859_c0_g1	KIK55637.1	hypothetical protein GYMLUDRAFT_833670 [Gymnopus luxurians FD-317 M1]	Gymnopus_luxurians	86	1.7e-19
TRINITY_DN11859_c0_g2	KIK55637.1	hypothetical protein GYMLUDRAFT_833670 [Gymnopus luxurians FD-317 M1]	Gymnopus_luxurians	77.3	4.6e-20
TRINITY_DN11919_c0_g1	KIK67117.1	glycoside hydrolase family 27 protein [Gymnopus luxurians FD-317 M1]	Gymnopus_luxurians	91.1	2.6e-38
TRINITY_DN12063_c0_g1	KIK59703.1	hypothetical protein GYMLUDRAFT_59842 [Gymnopus luxurians FD-317 M1]	Gymnopus_luxurians	86.9	5.4e-34
TRINITY_DN12255_c0_g1	KIK51755.1	glycoside hydrolase family 31 protein [Gymnopus luxurians FD-317 M1]	Gymnopus_luxurians	88.5	1.4e-56
TRINITY_DN12276_c0_g1	KIK65427.1	hypothetical protein GYMLUDRAFT_38883, partial [Gymnopus luxurians FD-317 M1]	Gymnopus_luxurians	91.5	3.6e-61
TRINITY_DN12572_c0_g2	KIK64331.1	hypothetical protein GYMLUDRAFT_258867 [Gymnopus luxurians FD-317 M1]	Gymnopus_luxurians	67.5	2.3e-55
TRINITY_DN12584_c0_g1	KIK69162.1	hypothetical protein GYMLUDRAFT_35231 [Gymnopus luxurians FD-317 M1]	Gymnopus_luxurians	98.6	6.5e-33
TRINITY_DN12584_c0_g2	KIK69162.1	hypothetical protein GYMLUDRAFT_35231 [Gymnopus luxurians FD-317 M1]	Gymnopus_luxurians	75	4.4e-35
TRINITY_DN12739_c0_g1	KIK70374.1	hypothetical protein GYMLUDRAFT_32378 [Gymnopus luxurians FD-317 M1]	Gymnopus_luxurians	91.4	2e-115
TRINITY_DN12859_c0_g1	KIK67151.1	hypothetical protein GYMLUDRAFT_54990 [Gymnopus luxurians FD-317 M1]	Gymnopus_luxurians	87.8	1.4e-73
TRINITY_DN12989_c0_g1	KIK52662.1	hypothetical protein GYMLUDRAFT_64112 [Gymnopus luxurians FD-317 M1]	Gymnopus_luxurians	73.8	2.4e-25
TRINITY_DN1298_c0_g1	KIK68030.1	hypothetical protein GYMLUDRAFT_81508 [Gymnopus luxurians FD-317 M1]	Gymnopus_luxurians	83	2.1e-37
TRINITY_DN13064_c0_g4	KIK60091.1	hypothetical protein GYMLUDRAFT_244535 [Gymnopus luxurians FD-317 M1]	Gymnopus_luxurians	92.7	4.4e-63
TRINITY_DN13075_c0_g1	KIK57301.1	hypothetical protein GYMLUDRAFT_247249 [Gymnopus luxurians FD-317 M1]	Gymnopus_luxurians	100	6.2e-12
TRINITY_DN13092_c0_g1	KIK70890.1	hypothetical protein GYMLUDRAFT_210494 [Gymnopus luxurians FD-317 M1]	Gymnopus_luxurians	88.6	4.1e-53
TRINITY_DN13135_c0_g1	KIK50037.1	hypothetical protein GYMLUDRAFT_253337 [Gymnopus luxurians FD-317 M1]	Gymnopus_luxurians	74.4	2.4e-62
TRINITY_DN13135_c0_g3	KIK50037.1	hypothetical protein GYMLUDRAFT_253337 [Gymnopus luxurians FD-317 M1]	Gymnopus_luxurians	80.6	2.5e-51
TRINITY_DN13145_c0_g3	KIK66294.1	hypothetical protein GYMLUDRAFT_38120 [Gymnopus luxurians FD-317 M1]	Gymnopus_luxurians	92.2	7.1e-86
TRINITY_DN13244_c0_g1	KIK50529.1	hypothetical protein GYMLUDRAFT_51134 [Gymnopus luxurians FD-317 M1]	Gymnopus_luxurians	81.9	6.2e-39
TRINITY_DN13399_c0_g1	KIK68057.1	hypothetical protein GYMLUDRAFT_216539 [Gymnopus luxurians FD-317 M1]	Gymnopus_luxurians	94.6	2.6e-208
TRINITY_DN13409_c0_g1	KIK66746.1	hypothetical protein GYMLUDRAFT_238981 [Gymnopus luxurians FD-317 M1]	Gymnopus_luxurians	80.2	1.1e-84
TRINITY_DN13409_c0_g2	KIK66741.1	hypothetical protein GYMLUDRAFT_911550 [Gymnopus luxurians FD-317 M1]	Gymnopus_luxurians	75	3.1e-80
TRINITY_DN13495_c0_g2	KIK70013.1	hypothetical protein GYMLUDRAFT_536280 [Gymnopus luxurians FD-317 M1]	Gymnopus_luxurians	64.4	2.3e-17
TRINITY_DN13810_c0_g1	KIK59774.1	hypothetical protein GYMLUDRAFT_168744 [Gymnopus luxurians FD-317 M1]	Gymnopus_luxurians	78	2.8e-209
TRINITY_DN14321_c0_g1	KIK64806.1	hypothetical protein GYMLUDRAFT_39768 [Gymnopus luxurians FD-317 M1]	Gymnopus_luxurians	89.2	4.1e-174
TRINITY_DN14388_c1_g17	KIK53282.1	hypothetical protein GYMLUDRAFT_179150 [Gymnopus luxurians FD-317 M1]	Gymnopus_luxurians	80.9	8.9e-43
TRINITY_DN14588_c0_g1	KIK67943.1	hypothetical protein GYMLUDRAFT_154919 [Gymnopus luxurians FD-317 M1]	Gymnopus_luxurians	100	4e-35
TRINITY_DN14761_c0_g1	KIK50997.1	hypothetical protein GYMLUDRAFT_78367 [Gymnopus luxurians FD-317 M1]	Gymnopus_luxurians	54.4	5.4e-38
TRINITY_DN1480_c0_g1	KIK68375.1	hypothetical protein GYMLUDRAFT_35782 [Gymnopus luxurians FD-317 M1]	Gymnopus_luxurians	61.1	1.6e-23
TRINITY_DN14987_c0_g1	KIK61331.1	hypothetical protein GYMLUDRAFT_225003 [Gymnopus luxurians FD-317 M1]	Gymnopus_luxurians	82.9	6.8e-74
TRINITY_DN15007_c0_g1	KIK67890.1	hypothetical protein GYMLUDRAFT_36689 [Gymnopus luxurians FD-317 M1]	Gymnopus_luxurians	87.1	4.8e-55
TRINITY_DN15027_c0_g1	KIK67037.1	hypothetical protein GYMLUDRAFT_37068 [Gymnopus luxurians FD-317 M1]	Gymnopus_luxurians	90.3	4.5e-45
TRINITY_DN15073_c0_g1	KIK54472.1	hypothetical protein GYMLUDRAFT_48615 [Gymnopus luxurians FD-317 M1]	Gymnopus_luxurians	100	2.9e-112
TRINITY_DN15085_c0_g1	KIK55495.1	hypothetical protein GYMLUDRAFT_47698 [Gymnopus luxurians FD-317 M1]	Gymnopus_luxurians	69.9	2.4e-42
TRINITY_DN15163_c0_g1	KIK71369.1	hypothetical protein GYMLUDRAFT_52461 [Gymnopus luxurians FD-317 M1]	Gymnopus_luxurians	91.1	3.2e-93
TRINITY_DN15196_c0_g1	KIK65444.1	hypothetical protein GYMLUDRAFT_219498 [Gymnopus luxurians FD-317 M1]	Gymnopus_luxurians	82.9	2.3e-28
TRINITY_DN15248_c0_g1	KIK68304.1	hypothetical protein GYMLUDRAFT_35690 [Gymnopus luxurians FD-317 M1]	Gymnopus_luxurians	100	3.8e-78
TRINITY_DN1540_c0_g1	KIK67626.1	hypothetical protein GYMLUDRAFT_237851 [Gymnopus luxurians FD-317 M1]	Gymnopus_luxurians	58.6	2.2e-14
TRINITY_DN15667_c0_g1	KIK67267.1	hypothetical protein GYMLUDRAFT_37349 [Gymnopus luxurians FD-317 M1]	Gymnopus_luxurians	90.2	2.3e-27
TRINITY_DN15846_c0_g1	KIK67220.1	hypothetical protein GYMLUDRAFT_69413 [Gymnopus luxurians FD-317 M1]	Gymnopus_luxurians	67.2	5.4e-14
TRINITY_DN16054_c0_g1	KIK70536.1	hypothetical protein GYMLUDRAFT_279025 [Gymnopus luxurians FD-317 M1]	Gymnopus_luxurians	58.7	1.6e-23
TRINITY_DN16174_c0_g1	KIK71119.1	hypothetical protein GYMLUDRAFT_975929, partial [Gymnopus luxurians FD-317 M1]	Gymnopus_luxurians	94.1	2.5e-25
TRINITY_DN16192_c0_g1	KIK55561.1	hypothetical protein GYMLUDRAFT_47782 [Gymnopus luxurians FD-317 M1]	Gymnopus_luxurians	96.8	3e-25
TRINITY_DN16355_c0_g1	KIK50034.1	hypothetical protein GYMLUDRAFT_253335 [Gymnopus luxurians FD-317 M1]	Gymnopus_luxurians	69.1	1.8e-81
TRINITY_DN1651_c0_g1	KIK70065.1	hypothetical protein GYMLUDRAFT_34521 [Gymnopus luxurians FD-317 M1]	Gymnopus_luxurians	90.1	1.8e-83
TRINITY_DN16541_c0_g1	KIK65704.1	hypothetical protein GYMLUDRAFT_366466 [Gymnopus luxurians FD-317 M1]	Gymnopus_luxurians	80.7	1.6e-35
TRINITY_DN16582_c0_g1	KIK59738.1	hypothetical protein GYMLUDRAFT_244952 [Gymnopus luxurians FD-317 M1]	Gymnopus_luxurians	100	9e-42
TRINITY_DN17071_c0_g1	KIK61258.1	hypothetical protein GYMLUDRAFT_43318 [Gymnopus luxurians FD-317 M1]	Gymnopus_luxurians	100	4.7e-35
TRINITY_DN2054_c0_g1	KIK64101.1	hypothetical protein GYMLUDRAFT_40350 [Gymnopus luxurians FD-317 M1]	Gymnopus_luxurians	89.6	4.9e-44
TRINITY_DN2400_c0_g1	KIK58668.1	hypothetical protein GYMLUDRAFT_45253 [Gymnopus luxurians FD-317 M1]	Gymnopus_luxurians	91.5	2.5e-32
TRINITY_DN2432_c0_g1	KIK51618.1	hypothetical protein GYMLUDRAFT_50435 [Gymnopus luxurians FD-317 M1]	Gymnopus_luxurians	63.5	3.8e-29
TRINITY_DN2773_c0_g1	KIK55245.1	hypothetical protein GYMLUDRAFT_248849 [Gymnopus luxurians FD-317 M1]	Gymnopus_luxurians	55.5	8.8e-18
TRINITY_DN2947_c0_g1	KIK56364.1	hypothetical protein GYMLUDRAFT_47140 [Gymnopus luxurians FD-317 M1]	Gymnopus_luxurians	83.6	7.1e-29
TRINITY_DN3109_c0_g1	KIK67850.1	hypothetical protein GYMLUDRAFT_36634 [Gymnopus luxurians FD-317 M1]	Gymnopus_luxurians	60.2	5.4e-24
TRINITY_DN3116_c0_g1	KIK69136.1	hypothetical protein GYMLUDRAFT_35206 [Gymnopus luxurians FD-317 M1]	Gymnopus_luxurians	89.7	7e-69
TRINITY_DN3191_c0_g1	KIK63081.1	hypothetical protein GYMLUDRAFT_57828 [Gymnopus luxurians FD-317 M1]	Gymnopus_luxurians	74.8	8.5e-37
TRINITY_DN3301_c0_g1	KIK57312.1	hypothetical protein GYMLUDRAFT_46183 [Gymnopus luxurians FD-317 M1]	Gymnopus_luxurians	93.6	5.1e-87
TRINITY_DN3441_c0_g1	KIK67772.1	hypothetical protein GYMLUDRAFT_154528 [Gymnopus luxurians FD-317 M1]	Gymnopus_luxurians	75.4	6.7e-47
TRINITY_DN348_c0_g1	KIK63731.1	hypothetical protein GYMLUDRAFT_40793 [Gymnopus luxurians FD-317 M1]	Gymnopus_luxurians	88.7	2.6e-58
TRINITY_DN3536_c0_g1	KIK67492.1	hypothetical protein GYMLUDRAFT_238770 [Gymnopus luxurians FD-317 M1]	Gymnopus_luxurians	47.6	1.1e-08
TRINITY_DN370_c0_g1	KIK71412.1	hypothetical protein GYMLUDRAFT_149905 [Gymnopus luxurians FD-317 M1]	Gymnopus_luxurians	75.3	1.9e-23
TRINITY_DN3729_c0_g1	KIK68088.1	hypothetical protein GYMLUDRAFT_92742 [Gymnopus luxurians FD-317 M1]	Gymnopus_luxurians	97.6	2.3e-40
TRINITY_DN3751_c0_g2	KIK70592.1	hypothetical protein GYMLUDRAFT_282397 [Gymnopus luxurians FD-317 M1]	Gymnopus_luxurians	77.1	5.9e-27
TRINITY_DN3803_c0_g1	KIK61817.1	hypothetical protein GYMLUDRAFT_73314 [Gymnopus luxurians FD-317 M1]	Gymnopus_luxurians	90.1	1.1e-32
TRINITY_DN3883_c0_g2	KIK70476.1	hypothetical protein GYMLUDRAFT_234940 [Gymnopus luxurians FD-317 M1]	Gymnopus_luxurians	100	3.9e-56
TRINITY_DN390_c0_g1	KIK68781.1	hypothetical protein GYMLUDRAFT_734038 [Gymnopus luxurians FD-317 M1]	Gymnopus_luxurians	100	2.4e-76
TRINITY_DN3935_c0_g1	KIK62349.1	hypothetical protein GYMLUDRAFT_58133 [Gymnopus luxurians FD-317 M1]	Gymnopus_luxurians	87.8	2.6e-223
TRINITY_DN4125_c0_g1	KIK68142.1	hypothetical protein GYMLUDRAFT_36977 [Gymnopus luxurians FD-317 M1]	Gymnopus_luxurians	74.6	4.2e-21
TRINITY_DN4208_c0_g1	KIK69067.1	hypothetical protein GYMLUDRAFT_152293 [Gymnopus luxurians FD-317 M1]	Gymnopus_luxurians	77.3	1.3e-55
TRINITY_DN450_c0_g1	KIK55588.1	hypothetical protein GYMLUDRAFT_839262 [Gymnopus luxurians FD-317 M1]	Gymnopus_luxurians	98.6	3.3e-32
TRINITY_DN4553_c0_g1	KIK57687.1	hypothetical protein GYMLUDRAFT_45853 [Gymnopus luxurians FD-317 M1]	Gymnopus_luxurians	42.9	6.5e-07
TRINITY_DN4640_c0_g1	KIK60114.1	hypothetical protein GYMLUDRAFT_261520 [Gymnopus luxurians FD-317 M1]	Gymnopus_luxurians	76.8	6.8e-72
TRINITY_DN4708_c0_g1	KIK56003.1	hypothetical protein GYMLUDRAFT_47465 [Gymnopus luxurians FD-317 M1]	Gymnopus_luxurians	62	7.9e-24
TRINITY_DN4943_c0_g2	KIK67141.1	hypothetical protein GYMLUDRAFT_37184 [Gymnopus luxurians FD-317 M1]	Gymnopus_luxurians	87.3	5.1e-25
TRINITY_DN5101_c0_g1	KIK55964.1	hypothetical protein GYMLUDRAFT_47432 [Gymnopus luxurians FD-317 M1]	Gymnopus_luxurians	84.5	1.8e-69
TRINITY_DN5181_c0_g3	KIK54365.1	hypothetical protein GYMLUDRAFT_48737 [Gymnopus luxurians FD-317 M1]	Gymnopus_luxurians	92.5	1.4e-73
TRINITY_DN5212_c0_g1	KIK61892.1	hypothetical protein GYMLUDRAFT_42306 [Gymnopus luxurians FD-317 M1]	Gymnopus_luxurians	76.2	5.7e-33
TRINITY_DN5258_c0_g1	KIK62453.1	hypothetical protein GYMLUDRAFT_41901 [Gymnopus luxurians FD-317 M1]	Gymnopus_luxurians	91	3.9e-27
TRINITY_DN5259_c0_g1	KIK69162.1	hypothetical protein GYMLUDRAFT_35231 [Gymnopus luxurians FD-317 M1]	Gymnopus_luxurians	94.6	4.8e-34
TRINITY_DN5879_c0_g1	KIK53265.1	hypothetical protein GYMLUDRAFT_265106 [Gymnopus luxurians FD-317 M1]	Gymnopus_luxurians	75.4	1.9e-19
TRINITY_DN5983_c0_g1	KIK67836.1	hypothetical protein GYMLUDRAFT_81358 [Gymnopus luxurians FD-317 M1]	Gymnopus_luxurians	86.1	2e-29
TRINITY_DN6194_c0_g1	KIK66620.1	hypothetical protein GYMLUDRAFT_908855 [Gymnopus luxurians FD-317 M1]	Gymnopus_luxurians	55.5	1.3e-31
TRINITY_DN6518_c0_g1	KIK70413.1	hypothetical protein GYMLUDRAFT_32417 [Gymnopus luxurians FD-317 M1]	Gymnopus_luxurians	86	2.2e-76
TRINITY_DN6873_c0_g1	KIK67777.1	hypothetical protein GYMLUDRAFT_793362 [Gymnopus luxurians FD-317 M1]	Gymnopus_luxurians	91.9	2e-10
TRINITY_DN7070_c0_g1	KIK67965.1	hypothetical protein GYMLUDRAFT_54680 [Gymnopus luxurians FD-317 M1]	Gymnopus_luxurians	84	2.2e-13
TRINITY_DN7168_c0_g1	KIK60159.1	hypothetical protein GYMLUDRAFT_244593 [Gymnopus luxurians FD-317 M1]	Gymnopus_luxurians	56.9	3.5e-14
TRINITY_DN7300_c0_g1	KIK69650.1	hypothetical protein GYMLUDRAFT_66949 [Gymnopus luxurians FD-317 M1]	Gymnopus_luxurians	87.1	7.8e-63
TRINITY_DN7427_c0_g1	KIK69577.1	hypothetical protein GYMLUDRAFT_66875 [Gymnopus luxurians FD-317 M1]	Gymnopus_luxurians	80.6	2e-76
TRINITY_DN7781_c0_g2	KIK60439.1	hypothetical protein GYMLUDRAFT_43754 [Gymnopus luxurians FD-317 M1]	Gymnopus_luxurians	58.6	2.7e-18
TRINITY_DN7864_c0_g1	KIK57210.1	hypothetical protein GYMLUDRAFT_75718 [Gymnopus luxurians FD-317 M1]	Gymnopus_luxurians	63.4	2e-18
TRINITY_DN8089_c0_g1	KIK61576.1	hypothetical protein GYMLUDRAFT_42586 [Gymnopus luxurians FD-317 M1]	Gymnopus_luxurians	85.3	2.9e-31
TRINITY_DN833_c0_g1	KIK60711.1	carbohydrate esterase family 4 protein [Gymnopus luxurians FD-317 M1]	Gymnopus_luxurians	87.3	3.6e-20
TRINITY_DN838_c0_g1	KIK62351.1	hypothetical protein GYMLUDRAFT_41768 [Gymnopus luxurians FD-317 M1]	Gymnopus_luxurians	87.3	9e-31
TRINITY_DN8578_c0_g2	KIK65619.1	hypothetical protein GYMLUDRAFT_258341 [Gymnopus luxurians FD-317 M1]	Gymnopus_luxurians	96.5	2.8e-41
TRINITY_DN8616_c0_g1	KIK70982.1	hypothetical protein GYMLUDRAFT_33082 [Gymnopus luxurians FD-317 M1]	Gymnopus_luxurians	92.7	5.5e-39
TRINITY_DN8665_c0_g1	KIK64261.1	hypothetical protein GYMLUDRAFT_40547 [Gymnopus luxurians FD-317 M1]	Gymnopus_luxurians	83.9	3.4e-38
TRINITY_DN8669_c0_g1	KIK70973.1	hypothetical protein GYMLUDRAFT_66182 [Gymnopus luxurians FD-317 M1]	Gymnopus_luxurians	92.5	8.6e-41
TRINITY_DN8785_c0_g1	KIK65210.1	glycoside hydrolase family 16 protein [Gymnopus luxurians FD-317 M1]	Gymnopus_luxurians	90	5.9e-82
TRINITY_DN8817_c0_g1	KIK65996.1	hypothetical protein GYMLUDRAFT_158752 [Gymnopus luxurians FD-317 M1]	Gymnopus_luxurians	96.9	2.1e-50
TRINITY_DN8826_c0_g1	KIK58328.1	hypothetical protein GYMLUDRAFT_45538 [Gymnopus luxurians FD-317 M1]	Gymnopus_luxurians	76.7	4.5e-24
TRINITY_DN8834_c0_g1	KIK71362.1	hypothetical protein GYMLUDRAFT_66572 [Gymnopus luxurians FD-317 M1]	Gymnopus_luxurians	76	4.7e-53
TRINITY_DN8887_c0_g1	KIK60491.1	hypothetical protein GYMLUDRAFT_43809 [Gymnopus luxurians FD-317 M1]	Gymnopus_luxurians	98.1	8.3e-23
TRINITY_DN8997_c0_g1	KIK69067.1	hypothetical protein GYMLUDRAFT_152293 [Gymnopus luxurians FD-317 M1]	Gymnopus_luxurians	93.8	1.5e-43
TRINITY_DN8997_c0_g2	KIK69067.1	hypothetical protein GYMLUDRAFT_152293 [Gymnopus luxurians FD-317 M1]	Gymnopus_luxurians	66.9	2.5e-52
TRINITY_DN9209_c0_g1	KIK65734.1	hypothetical protein GYMLUDRAFT_82884 [Gymnopus luxurians FD-317 M1]	Gymnopus_luxurians	91.8	3.2e-31
TRINITY_DN9560_c0_g2	KIK67110.1	hypothetical protein GYMLUDRAFT_217062 [Gymnopus luxurians FD-317 M1]	Gymnopus_luxurians	85.5	9e-26
TRINITY_DN9676_c0_g1	KIK71065.1	hypothetical protein GYMLUDRAFT_33192 [Gymnopus luxurians FD-317 M1]	Gymnopus_luxurians	80.4	6.5e-33
TRINITY_DN9683_c0_g2	KIK63134.1	hypothetical protein GYMLUDRAFT_84111 [Gymnopus luxurians FD-317 M1]	Gymnopus_luxurians	89.6	6.2e-258
TRINITY_DN9702_c0_g1	KIK69950.1	hypothetical protein GYMLUDRAFT_67202 [Gymnopus luxurians FD-317 M1]	Gymnopus_luxurians	94	8.2e-57
TRINITY_DN9742_c0_g1	KIK65616.1	hypothetical protein GYMLUDRAFT_39108 [Gymnopus luxurians FD-317 M1]	Gymnopus_luxurians	96.1	1.9e-20
TRINITY_DN14160_c0_g5	YP_009531542.1	NADH dehydrogenase subunit 1 (mitochondrion) [Hannaella oryzae]	Hannaella_oryzae	42.8	2.3e-53
TRINITY_DN13792_c0_g1	OBA25973.1	hypothetical protein HANVADRAFT_26095 [Hanseniaspora valbyensis NRRL Y-1626]	Hanseniaspora_valbyensis	26.4	1.3e-13
TRINITY_DN13432_c0_g2	NP_803494.1	NADH dehydrogenase subunit 3 (mitochondrion) [Harpochytrium sp. JEL105]	Harpochytrium_sp._JEL105	51.6	2.1e-07
TRINITY_DN13428_c0_g1	KIM44601.1	hypothetical protein M413DRAFT_17621 [Hebeloma cylindrosporum h7]	Hebeloma_cylindrosporum	74.7	1.1e-34
TRINITY_DN13428_c0_g2	KIM44601.1	hypothetical protein M413DRAFT_17621 [Hebeloma cylindrosporum h7]	Hebeloma_cylindrosporum	74.7	1.4e-34
TRINITY_DN16558_c0_g1	KIM37979.1	hypothetical protein M413DRAFT_249217 [Hebeloma cylindrosporum h7]	Hebeloma_cylindrosporum	48.7	6e-14
TRINITY_DN2022_c0_g1	KIM35087.1	hypothetical protein M413DRAFT_32796 [Hebeloma cylindrosporum h7]	Hebeloma_cylindrosporum	25	2.5e-18
TRINITY_DN13934_c1_g5	PGG99980.1	hypothetical protein AJ79_08342 [Helicocarpus griseus UAMH5409]	Helicocarpus_griseus	79.8	2e-141
TRINITY_DN14172_c2_g11	PGH15923.1	hypothetical protein AJ79_02090 [Helicocarpus griseus UAMH5409]	Helicocarpus_griseus	39.9	7e-103
TRINITY_DN14168_c0_g1	ORX49822.1	putative ribosomal protein L10 [Hesseltinella vesiculosa]	Hesseltinella_vesiculosa	74.3	1.9e-92
TRINITY_DN7414_c0_g2	ORX47197.1	amino acid transporter [Hesseltinella vesiculosa]	Hesseltinella_vesiculosa	33.3	6.5e-10
TRINITY_DN9830_c0_g1	ORX47505.1	hypothetical protein DM01DRAFT_1339135 [Hesseltinella vesiculosa]	Hesseltinella_vesiculosa	53.9	5.1e-13
TRINITY_DN12093_c0_g1	XP_009542771.1	hypothetical protein HETIRDRAFT_414947 [Heterobasidion irregulare TC 32-1]	Heterobasidion_irregulare	51.4	8e-32
TRINITY_DN3002_c0_g1	XP_009547459.1	chloride channel [Heterobasidion irregulare TC 32-1]	Heterobasidion_irregulare	35	3.3e-13
TRINITY_DN2731_c0_g2	KJZ75175.1	hypothetical protein HIM_05369 [Hirsutella minnesotensis 3608]	Hirsutella_minnesotensis	64.4	1.2e-09
TRINITY_DN1050_c0_g2	C0NKW7.1	RecName: Full=40S ribosomal protein S0	Histoplasma_capsulatum	57.6	3.1e-60
TRINITY_DN13994_c0_g2	EEH07462.1	CobW domain-containing protein [Histoplasma capsulatum G186AR]	Histoplasma_capsulatum	48.5	2.5e-07
TRINITY_DN2752_c0_g1	RMY45008.1	hypothetical protein D0865_10186 [Hortaea werneckii]	Hortaea_werneckii	90.1	5.3e-63
TRINITY_DN7524_c0_g1	XP_024736797.1	DUF239-domain-containing protein [Meliniomyces bicolor E]	Hyaloscypha_bicolor	30.9	2.2e-33
TRINITY_DN15893_c0_g1	AWM95747.1	translationally-controlled tumor protein [Hygrophoropsis aurantiaca]	Hygrophoropsis_aurantiaca	82.1	7.8e-76
TRINITY_DN12656_c1_g1	KJA29074.1	hypothetical protein HYPSUDRAFT_128456 [Hypholoma sublateritium FD-334 SS-4]	Hypholoma_sublateritium	40	3e-07
TRINITY_DN15481_c0_g1	KJA16366.1	hypothetical protein HYPSUDRAFT_47387 [Hypholoma sublateritium FD-334 SS-4]	Hypholoma_sublateritium	79.1	7.8e-27
TRINITY_DN8188_c0_g1	KJA25479.1	hypothetical protein HYPSUDRAFT_160627 [Hypholoma sublateritium FD-334 SS-4]	Hypholoma_sublateritium	98.6	5e-32
TRINITY_DN15293_c0_g1	OTB02310.1	hypothetical protein M426DRAFT_322735 [Hypoxylon sp. CI-4A]	Hypoxylon_sp._CI-4A	58.1	1.5e-17
TRINITY_DN14084_c2_g8	OTA73783.1	hypothetical protein M434DRAFT_88551, partial [Hypoxylon sp. CO27-5]	Hypoxylon_sp._CO27-5	70.7	3.1e-23
TRINITY_DN14224_c0_g18	OTA54458.1	acid protease [Hypoxylon sp. EC38]	Hypoxylon_sp._EC38	45.5	1.8e-15
TRINITY_DN14381_c0_g4	OTA53476.1	hypothetical protein K449DRAFT_440089 [Hypoxylon sp. EC38]	Hypoxylon_sp._EC38	75.8	4.4e-78
TRINITY_DN1050_c0_g1	RDB24711.1	40S ribosomal protein S0 [Hypsizygus marmoreus]	Hypsizygus_marmoreus	68.3	2.6e-17
TRINITY_DN11204_c0_g1	RDB29664.1	hypothetical protein Hypma_015253 [Hypsizygus marmoreus]	Hypsizygus_marmoreus	93.6	3.6e-56
TRINITY_DN14800_c0_g1	RDB16459.1	putative peroxiredoxin [Hypsizygus marmoreus]	Hypsizygus_marmoreus	51.3	4.3e-13
TRINITY_DN5733_c0_g1	RDB25478.1	hypothetical protein Hypma_007700 [Hypsizygus marmoreus]	Hypsizygus_marmoreus	42.2	1.8e-17
TRINITY_DN10215_c0_g1	KDQ64739.1	hypothetical protein JAAARDRAFT_118193 [Jaapia argillacea MUCL 33604]	Jaapia_argillacea	41	1.2e-22
TRINITY_DN10222_c0_g1	KDQ61301.1	hypothetical protein JAAARDRAFT_173948 [Jaapia argillacea MUCL 33604]	Jaapia_argillacea	79.5	5.7e-54
TRINITY_DN11693_c0_g1	KDQ64725.1	hypothetical protein JAAARDRAFT_64565 [Jaapia argillacea MUCL 33604]	Jaapia_argillacea	70.6	4.3e-46
TRINITY_DN14392_c1_g5	XP_025358980.1	14-3-3 protein [Jaminaea rosea]	Jaminaea_rosea	67.2	1.6e-83
TRINITY_DN10964_c0_g1	RUP42673.1	N2227-like protein [Jimgerdemannia flammicorona]	Jimgerdemannia_flammicorona	57.9	8.4e-14
TRINITY_DN1119_c0_g1	RUP50660.1	Snf7-domain-containing protein [Jimgerdemannia flammicorona]	Jimgerdemannia_flammicorona	50	1.3e-07
TRINITY_DN11453_c0_g1	RUP51364.1	ribosomal protein L6e-domain-containing protein [Jimgerdemannia flammicorona]	Jimgerdemannia_flammicorona	48.9	3.4e-45
TRINITY_DN11453_c1_g1	RUP51364.1	ribosomal protein L6e-domain-containing protein [Jimgerdemannia flammicorona]	Jimgerdemannia_flammicorona	48.4	1.7e-50
TRINITY_DN11453_c1_g2	RUP51364.1	ribosomal protein L6e-domain-containing protein [Jimgerdemannia flammicorona]	Jimgerdemannia_flammicorona	59.2	4.2e-30
TRINITY_DN12416_c0_g1	RUO97029.1	hypothetical protein BC936DRAFT_141090 [Jimgerdemannia flammicorona]	Jimgerdemannia_flammicorona	59.6	3.2e-07
TRINITY_DN12656_c1_g5	RUP45467.1	eukaryotic translation initiation factor 3 subunit 8 N-terminus-domain-containing protein, partial [Jimgerdemannia flammicorona]	Jimgerdemannia_flammicorona	43.8	9e-20
TRINITY_DN12714_c0_g1	RUP50300.1	armadillo-type protein [Jimgerdemannia flammicorona]	Jimgerdemannia_flammicorona	39.6	6.1e-29
TRINITY_DN12819_c0_g2	RUP50066.1	ribonucleotide reductase [Jimgerdemannia flammicorona]	Jimgerdemannia_flammicorona	74.8	2.5e-45
TRINITY_DN13016_c0_g1	RUO95920.1	phospholipid-hydroperoxide glutathione peroxidase [Jimgerdemannia flammicorona]	Jimgerdemannia_flammicorona	54.3	1.2e-29
TRINITY_DN13016_c0_g2	RUS29447.1	glutathione peroxidase [Jimgerdemannia flammicorona]	Jimgerdemannia_flammicorona	54.4	4.3e-41
TRINITY_DN13536_c1_g1	RUP32489.1	severin [Jimgerdemannia flammicorona]	Jimgerdemannia_flammicorona	37.6	2.9e-55
TRINITY_DN13593_c0_g4	RUS34049.1	armadillo-type protein, partial [Jimgerdemannia flammicorona]	Jimgerdemannia_flammicorona	70.7	1.3e-41
TRINITY_DN13670_c0_g2	RUS26543.1	hypothetical protein BC938DRAFT_470631 [Jimgerdemannia flammicorona]	Jimgerdemannia_flammicorona	58.1	4.8e-69
TRINITY_DN14259_c0_g1	RUS29465.1	40S ribosomal protein S24 [Jimgerdemannia flammicorona]	Jimgerdemannia_flammicorona	70	3.5e-36
TRINITY_DN14259_c0_g2	RUS29465.1	40S ribosomal protein S24 [Jimgerdemannia flammicorona]	Jimgerdemannia_flammicorona	70	3.7e-36
TRINITY_DN14270_c1_g1	RUS26350.1	ADP-ribosylation factor family-domain-containing protein [Jimgerdemannia flammicorona]	Jimgerdemannia_flammicorona	80	2.1e-21
TRINITY_DN14616_c1_g4	RUS24212.1	Cupredoxin [Jimgerdemannia flammicorona]	Jimgerdemannia_flammicorona	33.8	1.3e-56
TRINITY_DN15511_c0_g1	RUP49783.1	hypothetical protein BC936DRAFT_141505 [Jimgerdemannia flammicorona]	Jimgerdemannia_flammicorona	75	8.3e-17
TRINITY_DN4245_c0_g1	RUP49783.1	hypothetical protein BC936DRAFT_141505 [Jimgerdemannia flammicorona]	Jimgerdemannia_flammicorona	72.9	3.1e-14
TRINITY_DN4481_c0_g1	RUS30255.1	hypothetical protein BC938DRAFT_479646 [Jimgerdemannia flammicorona]	Jimgerdemannia_flammicorona	45.6	1.7e-25
TRINITY_DN4682_c0_g1	RUP42968.1	Tim10/DDP family zinc finger-domain-containing protein [Jimgerdemannia flammicorona]	Jimgerdemannia_flammicorona	50	1.3e-11
TRINITY_DN5587_c0_g1	RUO96578.1	RNA polymerase II subunit A [Jimgerdemannia flammicorona]	Jimgerdemannia_flammicorona	66.2	1.5e-21
TRINITY_DN6086_c0_g1	RUS29844.1	myosin-like coiled-coil protein-domain-containing protein [Jimgerdemannia flammicorona]	Jimgerdemannia_flammicorona	36.5	1.4e-07
TRINITY_DN6465_c0_g1	RUP50483.1	proteasome maturation factor UMP1 [Jimgerdemannia flammicorona]	Jimgerdemannia_flammicorona	46.2	8.6e-25
TRINITY_DN7169_c0_g1	RUP44707.1	glutamine synthetase 1 [Jimgerdemannia flammicorona]	Jimgerdemannia_flammicorona	62	3e-127
TRINITY_DN8315_c0_g1	RUO96738.1	T-complex protein 1 subunit gamma, partial [Jimgerdemannia flammicorona]	Jimgerdemannia_flammicorona	60.7	8.5e-12
TRINITY_DN9054_c0_g1	RUP49014.1	hypothetical protein BC936DRAFT_143481 [Jimgerdemannia flammicorona]	Jimgerdemannia_flammicorona	39	2.6e-11
TRINITY_DN9968_c0_g2	RUS29440.1	hypothetical protein BC938DRAFT_480659 [Jimgerdemannia flammicorona]	Jimgerdemannia_flammicorona	42.2	6.6e-29
TRINITY_DN14443_c2_g1	ATI20486.1	endonuclease, partial (mitochondrion) [Juglanconis juglandina]	Juglanconis_juglandina	38.5	6.7e-38
TRINITY_DN9800_c0_g1	XP_003956296.1	hypothetical protein KAFR_0C01680 [Kazachstania africana CBS 2517]	Kazachstania_africana	27	6.3e-09
TRINITY_DN1946_c0_g1	XP_022462072.1	hypothetical protein KNAG_0A01370 [Kazachstania naganishii CBS 8797]	Kazachstania_naganishii	49.3	3.3e-12
TRINITY_DN8568_c0_g1	SMN20134.1	similar to Saccharomyces cerevisiae YDR502C SAM2 S-adenosylmethionine synthetase, catalyzes transfer of the adenosyl group of ATP to the sulfur atom of methionine [Kazachstania saulgeensis]	Kazachstania_saulgeensis	71.6	4e-26
TRINITY_DN9122_c0_g1	SMN20347.1	similar to Saccharomyces cerevisiae YDR059C UBC5 Ubiquitin-conjugating enzyme that mediates selective degradation of short-lived, abnormal, or excess proteins, including histone H3 [Kazachstania saulgeensis]	Kazachstania_saulgeensis	76	2.4e-31
TRINITY_DN13276_c0_g2	XP_022673760.1	elongation factor Tu [Kluyveromyces marxianus DMKU3-1042]	Kluyveromyces_marxianus	71	1.3e-81
TRINITY_DN3585_c0_g1	XP_022674219.1	eukaryotic translation initiation factor 5A-2 [Kluyveromyces marxianus DMKU3-1042]	Kluyveromyces_marxianus	73.1	1.1e-34
TRINITY_DN5242_c0_g1	XP_022678417.1	autophagy-related protein 8 [Kluyveromyces marxianus DMKU3-1042]	Kluyveromyces_marxianus	64.3	1.8e-24
TRINITY_DN12761_c0_g1	XP_021869226.1	hypothetical protein BD324DRAFT_582605 [Kockovaella imperatae]	Kockovaella_imperatae	63.4	1.6e-52
TRINITY_DN5195_c0_g1	XP_021871918.1	histone H3 [Kockovaella imperatae]	Kockovaella_imperatae	96.7	5.1e-40
TRINITY_DN13052_c0_g3	ANZ76132.1	BA75_02103T0 [Komagataella pastoris]	Komagataella_pastoris	74.3	2.8e-39
TRINITY_DN13052_c0_g4	ANZ76132.1	BA75_02103T0 [Komagataella pastoris]	Komagataella_pastoris	82.3	3.8e-24
TRINITY_DN4303_c0_g1	CAY67128.1	alcohol dehydrogenase [Komagataella pastoris]	Komagataella_pastoris	55.8	3.2e-22
TRINITY_DN14511_c0_g1	XP_002490478.1	Subunit of cleavage factor I [Komagataella phaffii GS115]	Komagataella_phaffii	44.9	1.3e-38
TRINITY_DN13593_c0_g5	XP_018265646.1	26S proteasome regulatory subunit N1 [Kwoniella dejecticola CBS 10117]	Kwoniella_dejecticola	49.4	1.3e-14
TRINITY_DN12056_c0_g1	OCF61867.1	insulysin [Kwoniella mangroviensis CBS 10435]	Kwoniella_mangrovensis	39.8	5.5e-17
TRINITY_DN7867_c0_g1	XP_019004494.1	60S ribosomal protein L12 [Kwoniella mangroviensis CBS 8507]	Kwoniella_mangrovensis	76.5	2.7e-15
TRINITY_DN12556_c0_g1	KIK02764.1	hypothetical protein K443DRAFT_677352 [Laccaria amethystina LaAM-08-1]	Laccaria_amethystina	36.4	8.5e-11
TRINITY_DN10608_c0_g1	XP_001879453.1	predicted protein [Laccaria bicolor S238N-H82]	Laccaria_bicolor	100	1.1e-11
TRINITY_DN14815_c0_g1	XP_001883044.1	predicted protein [Laccaria bicolor S238N-H82]	Laccaria_bicolor	38.1	1.5e-17
TRINITY_DN15578_c0_g1	SCU97173.1	LADA_0H04896g1_1 [Lachancea dasiensis CBS 10888]	Lachancea_dasiensis	62.6	3.8e-49
TRINITY_DN13825_c0_g2	SCW00873.1	LAFE_0C13894g1_1 [Lachancea fermentati]	Lachancea_fermentati	40.5	7.6e-62
TRINITY_DN13502_c1_g1	SCU82538.1	LAME_0C01662g1_1 [Lachancea meyersii CBS 8951]	Lachancea_meyersii	37.5	2.1e-08
TRINITY_DN7062_c0_g1	SCU96346.1	LAMI_0F06238g1_1 [Lachancea mirantina]	Lachancea_mirantina	37.4	6.2e-13
TRINITY_DN78_c0_g1	KZT08661.1	mitochondrial carrier [Laetiporus sulphureus 93-53]	Laetiporus_sulphureus	38.8	4e-06
TRINITY_DN10028_c0_g1	GAV99945.1	acyl- oxidase [Lentinula edodes]	Lentinula_edodes	100	1.3e-50
TRINITY_DN10028_c0_g2	GAV99945.1	acyl- oxidase [Lentinula edodes]	Lentinula_edodes	100	1e-37
TRINITY_DN1002_c0_g1	GAW03802.1	transcription initiation factor IID TAF10 subunit [Lentinula edodes]	Lentinula_edodes	76.6	8.8e-17
TRINITY_DN10042_c0_g1	GAW10160.1	acetylornithine aminotransferase [Lentinula edodes]	Lentinula_edodes	100	8.7e-46
TRINITY_DN1006_c0_g1	GAW02298.1	hypothetical protein LENED_003944 [Lentinula edodes]	Lentinula_edodes	100	2.5e-18
TRINITY_DN10079_c0_g1	GAW03719.1	GPI-anchored small secreted protein [Lentinula edodes]	Lentinula_edodes	99.2	5.4e-142
TRINITY_DN10092_c0_g1	GAW03761.1	thioredoxin [Lentinula edodes]	Lentinula_edodes	100	2.3e-57
TRINITY_DN10109_c0_g1	GAW04169.1	aldehyde dehydrogenase [Lentinula edodes]	Lentinula_edodes	99.8	2e-283
TRINITY_DN10109_c0_g2	GAW04170.1	aldehyde dehydrogenase [Lentinula edodes]	Lentinula_edodes	100	4.4e-294
TRINITY_DN10120_c0_g1	GAW00367.1	pali-domain-containing protein [Lentinula edodes]	Lentinula_edodes	100	7.6e-37
TRINITY_DN10132_c0_g1	GAV99588.1	hypothetical protein LENED_001054 [Lentinula edodes]	Lentinula_edodes	100	2.1e-47
TRINITY_DN10133_c0_g1	GAW08387.1	protein vip1 [Lentinula edodes]	Lentinula_edodes	99.6	5.9e-126
TRINITY_DN10135_c0_g1	GAV99558.1	succinate-semialdehyde dehydrogenase [Lentinula edodes]	Lentinula_edodes	100	7.1e-28
TRINITY_DN10135_c0_g2	GAV99558.1	succinate-semialdehyde dehydrogenase [Lentinula edodes]	Lentinula_edodes	100	2.4e-39
TRINITY_DN10162_c0_g1	GAW02963.1	iron reductase [Lentinula edodes]	Lentinula_edodes	100	9.3e-65
TRINITY_DN1016_c0_g1	GAW06485.1	voltage-dependent ion-selective channel [Lentinula edodes]	Lentinula_edodes	100	7.7e-161
TRINITY_DN10194_c0_g1	GAW00910.1	UDP-glucose 4-epimerase [Lentinula edodes]	Lentinula_edodes	71.8	2.1e-25
TRINITY_DN10212_c0_g1	GAW09339.1	60s ribosomal protein l28 [Lentinula edodes]	Lentinula_edodes	100	2.4e-37
TRINITY_DN10228_c0_g1	GAW06677.1	amino acid transporter [Lentinula edodes]	Lentinula_edodes	100	6.6e-30
TRINITY_DN10247_c0_g1	GAW10042.1	lanosterol 14-alpha-demethylase [Lentinula edodes]	Lentinula_edodes	100	9.6e-35
TRINITY_DN10255_c0_g1	GAW08747.1	hypothetical protein LENED_010830 [Lentinula edodes]	Lentinula_edodes	100	1.4e-44
TRINITY_DN10255_c0_g2	GAW08747.1	hypothetical protein LENED_010830 [Lentinula edodes]	Lentinula_edodes	98.9	1.2e-48
TRINITY_DN10255_c0_g3	GAW08747.1	hypothetical protein LENED_010830 [Lentinula edodes]	Lentinula_edodes	97.5	2.8e-45
TRINITY_DN10270_c0_g1	GAW02827.1	hypothetical protein LENED_004501 [Lentinula edodes]	Lentinula_edodes	67.7	7.3e-10
TRINITY_DN10297_c0_g1	GAW06075.1	cell division control GTP binding protein [Lentinula edodes]	Lentinula_edodes	99.2	9.4e-53
TRINITY_DN10298_c0_g1	GAW10544.1	citrate synthase [Lentinula edodes]	Lentinula_edodes	100	2.4e-64
TRINITY_DN10298_c0_g3	GAW10544.1	citrate synthase [Lentinula edodes]	Lentinula_edodes	100	4.1e-40
TRINITY_DN10311_c0_g1	GAW01864.1	hypothetical protein LENED_003485 [Lentinula edodes]	Lentinula_edodes	100	2.2e-78
TRINITY_DN10314_c0_g1	GAW08346.1	f1 atpase assembly protein 11 [Lentinula edodes]	Lentinula_edodes	98.3	3e-20
TRINITY_DN10318_c0_g1	AAT99291.1	laccase 3 VT [Lentinula edodes]	Lentinula_edodes	100	5.3e-45
TRINITY_DN10359_c0_g1	GAW02003.1	delta 5 fatty acid desaturase [Lentinula edodes]	Lentinula_edodes	60.4	2.5e-33
TRINITY_DN10359_c0_g2	GAW02003.1	delta 5 fatty acid desaturase [Lentinula edodes]	Lentinula_edodes	72.9	2.1e-23
TRINITY_DN10389_c0_g1	GAW01593.1	heparinase ii iii family protein [Lentinula edodes]	Lentinula_edodes	100	4.5e-71
TRINITY_DN10400_c0_g3	GAW03345.1	ATP synthase F1 gamma [Lentinula edodes]	Lentinula_edodes	100	4.4e-83
TRINITY_DN10400_c0_g4	GAW03345.1	ATP synthase F1 gamma [Lentinula edodes]	Lentinula_edodes	100	4.3e-46
TRINITY_DN10417_c0_g1	GAW09916.1	MFS general substrate transporter [Lentinula edodes]	Lentinula_edodes	100	3.8e-50
TRINITY_DN10417_c0_g2	GAW09916.1	MFS general substrate transporter [Lentinula edodes]	Lentinula_edodes	100	1.3e-44
TRINITY_DN10419_c0_g1	GAW08336.1	vacuolar protein 8 [Lentinula edodes]	Lentinula_edodes	100	9.9e-38
TRINITY_DN10440_c0_g1	GAW03249.1	hypothetical protein LENED_004959 [Lentinula edodes]	Lentinula_edodes	100	6.7e-12
TRINITY_DN10440_c0_g3	GAW03250.1	hypothetical protein LENED_004958 [Lentinula edodes]	Lentinula_edodes	100	2.2e-39
TRINITY_DN10449_c0_g1	GAW01075.1	multidrug transporter [Lentinula edodes]	Lentinula_edodes	100	2.8e-33
TRINITY_DN10495_c0_g1	GAW00240.1	hypothetical protein LENED_001742 [Lentinula edodes]	Lentinula_edodes	100	1.4e-68
TRINITY_DN10495_c0_g2	GAW00240.1	hypothetical protein LENED_001742 [Lentinula edodes]	Lentinula_edodes	100	1e-40
TRINITY_DN10515_c0_g1	GAW04907.1	autophagy-related protein 11 [Lentinula edodes]	Lentinula_edodes	100	9.4e-76
TRINITY_DN10531_c0_g1	GAW06974.1	hypothetical protein LENED_008933 [Lentinula edodes]	Lentinula_edodes	100	4.8e-49
TRINITY_DN10533_c0_g1	GAW02696.1	isoform b [Lentinula edodes]	Lentinula_edodes	96.4	1.4e-22
TRINITY_DN10593_c0_g1	GAV99141.1	cluster assembly scaffold [Lentinula edodes]	Lentinula_edodes	99.3	6.3e-78
TRINITY_DN105_c0_g1	GAV98874.1	hypothetical protein LENED_000286 [Lentinula edodes]	Lentinula_edodes	100	1.1e-37
TRINITY_DN10616_c0_g1	GAW04419.1	hypothetical protein LENED_006208 [Lentinula edodes]	Lentinula_edodes	100	9.5e-69
TRINITY_DN10624_c0_g1	GAW04029.1	hypothetical protein LENED_005792 [Lentinula edodes]	Lentinula_edodes	99.3	2.7e-70
TRINITY_DN10641_c0_g1	GAW05166.1	rna annealing factor [Lentinula edodes]	Lentinula_edodes	97.9	3.1e-16
TRINITY_DN10641_c0_g2	GAW05166.1	rna annealing factor [Lentinula edodes]	Lentinula_edodes	99.2	1.8e-64
TRINITY_DN1064_c0_g1	GAW09448.1	hypothetical protein LENED_011603 [Lentinula edodes]	Lentinula_edodes	98.5	1.3e-64
TRINITY_DN10670_c0_g3	GAW02383.1	hypothetical protein LENED_004035 [Lentinula edodes]	Lentinula_edodes	41.6	3.9e-07
TRINITY_DN10681_c0_g1	GAW00361.1	hypothetical protein LENED_001875 [Lentinula edodes]	Lentinula_edodes	93.3	2.9e-78
TRINITY_DN10704_c0_g1	GAW00241.1	clp1-like protein [Lentinula edodes]	Lentinula_edodes	99.5	6.9e-116
TRINITY_DN10749_c0_g1	GAW10389.1	hypothetical protein LENED_012647 [Lentinula edodes]	Lentinula_edodes	100	4.3e-209
TRINITY_DN1079_c0_g1	GAW01913.1	WD40 repeat-like protein [Lentinula edodes]	Lentinula_edodes	100	1.7e-22
TRINITY_DN10811_c0_g1	GAW01664.1	cytochrome c oxidase polypeptide IV [Lentinula edodes]	Lentinula_edodes	98.1	3.4e-82
TRINITY_DN10860_c0_g1	GAW08010.1	translation elongation factor Tu [Lentinula edodes]	Lentinula_edodes	100	1.3e-34
TRINITY_DN10860_c0_g2	GAW08010.1	translation elongation factor Tu [Lentinula edodes]	Lentinula_edodes	100	2.5e-19
TRINITY_DN10871_c0_g1	GAW02969.1	hypothetical protein LENED_004651 [Lentinula edodes]	Lentinula_edodes	99.2	5.1e-62
TRINITY_DN10876_c0_g1	GAW09168.1	hypothetical protein LENED_011302 [Lentinula edodes]	Lentinula_edodes	92.4	4.4e-58
TRINITY_DN10879_c0_g1	GAW04379.1	purarive Serine threonine protein kinase [Lentinula edodes]	Lentinula_edodes	100	3.5e-109
TRINITY_DN10891_c0_g1	GAW06602.1	FAD NAD-P-binding domain-containing protein [Lentinula edodes]	Lentinula_edodes	99.3	1.3e-76
TRINITY_DN10895_c0_g1	GAV99587.1	hypothetical protein LENED_001052 [Lentinula edodes]	Lentinula_edodes	99.4	1.5e-79
TRINITY_DN10913_c0_g1	GAW09882.1	hypothetical protein LENED_012094 [Lentinula edodes]	Lentinula_edodes	91.2	2.9e-46
TRINITY_DN10913_c0_g2	GAW09882.1	hypothetical protein LENED_012094 [Lentinula edodes]	Lentinula_edodes	93.9	2.5e-48
TRINITY_DN10915_c0_g1	GAW04813.1	FAD-linked oxidoreductase [Lentinula edodes]	Lentinula_edodes	94.4	6.3e-41
TRINITY_DN10915_c0_g2	GAW04813.1	FAD-linked oxidoreductase [Lentinula edodes]	Lentinula_edodes	98.1	1.3e-51
TRINITY_DN10918_c0_g1	GAW08576.1	NADH-ubiquinone oxidoreductase [Lentinula edodes]	Lentinula_edodes	100	2.3e-43
TRINITY_DN10918_c1_g1	GAW08576.1	NADH-ubiquinone oxidoreductase [Lentinula edodes]	Lentinula_edodes	100	2.1e-72
TRINITY_DN10922_c0_g1	GAW04186.1	hypothetical protein LENED_005961 [Lentinula edodes]	Lentinula_edodes	100	6.4e-52
TRINITY_DN10944_c0_g1	GAV99783.1	hypothetical protein LENED_001264 [Lentinula edodes]	Lentinula_edodes	100	5.3e-11
TRINITY_DN11006_c0_g1	GAW05538.1	hypothetical protein LENED_007401 [Lentinula edodes]	Lentinula_edodes	98.4	3.7e-28
TRINITY_DN11012_c0_g1	GAV99474.1	translation initiation factor eif3g [Lentinula edodes]	Lentinula_edodes	100	4.4e-48
TRINITY_DN11039_c0_g1	GAV99623.1	hypothetical protein LENED_001092 [Lentinula edodes]	Lentinula_edodes	99.5	2.1e-120
TRINITY_DN11092_c0_g1	GAW05485.1	hypothetical protein LENED_007346 [Lentinula edodes]	Lentinula_edodes	100	1.8e-50
TRINITY_DN11093_c0_g1	GAW02841.1	NAD -binding protein [Lentinula edodes]	Lentinula_edodes	100	2e-74
TRINITY_DN11116_c0_g1	GAW06010.1	hypothetical protein LENED_007902 [Lentinula edodes]	Lentinula_edodes	98.6	1.4e-30
TRINITY_DN11144_c0_g1	GAW09210.1	trp-asp repeats containing protein [Lentinula edodes]	Lentinula_edodes	100	3.1e-54
TRINITY_DN11170_c0_g1	GAW01154.1	O-acetylhomoserine ami [Lentinula edodes]	Lentinula_edodes	100	2e-34
TRINITY_DN11178_c0_g1	GAW09190.1	transmembrane protein [Lentinula edodes]	Lentinula_edodes	100	3.6e-35
TRINITY_DN11195_c0_g1	GAW09224.1	hypothetical protein LENED_011366 [Lentinula edodes]	Lentinula_edodes	100	1.6e-31
TRINITY_DN1122_c0_g1	GAW07828.1	cytochrome-c oxidase chain vi [Lentinula edodes]	Lentinula_edodes	99.3	1.3e-67
TRINITY_DN1124_c0_g1	GAW05676.1	glycopeptide [Lentinula edodes]	Lentinula_edodes	98.1	9.3e-84
TRINITY_DN11260_c0_g1	GAW03977.1	acid protease [Lentinula edodes]	Lentinula_edodes	98.9	3.7e-29
TRINITY_DN11260_c0_g2	GAW03977.1	acid protease [Lentinula edodes]	Lentinula_edodes	99	4.4e-49
TRINITY_DN11265_c0_g1	GAW01593.1	heparinase ii iii family protein [Lentinula edodes]	Lentinula_edodes	100	5e-40
TRINITY_DN11268_c0_g1	GAW01964.1	mitochondrial protein import protein mas5 [Lentinula edodes]	Lentinula_edodes	100	5.7e-42
TRINITY_DN11268_c0_g2	GAW01964.1	mitochondrial protein import protein mas5 [Lentinula edodes]	Lentinula_edodes	100	7.4e-76
TRINITY_DN11287_c0_g1	GAW08592.1	hypothetical protein LENED_010660 [Lentinula edodes]	Lentinula_edodes	100	6.4e-25
TRINITY_DN11297_c0_g1	GAV99296.1	differentiation regulator [Lentinula edodes]	Lentinula_edodes	83.8	6.8e-59
TRINITY_DN11319_c0_g1	GAV98656.1	hypothetical protein LENED_000045 [Lentinula edodes]	Lentinula_edodes	83.4	1.7e-42
TRINITY_DN11324_c0_g1	GAV99950.1	60S ribosomal protein L17 L23 [Lentinula edodes]	Lentinula_edodes	100	3.7e-96
TRINITY_DN11332_c0_g1	GAW02677.1	Heme-responsive zinc finger transcription factor HAP1 [Lentinula edodes]	Lentinula_edodes	100	5.8e-23
TRINITY_DN11332_c0_g3	GAW02677.1	Heme-responsive zinc finger transcription factor HAP1 [Lentinula edodes]	Lentinula_edodes	96.8	1.2e-26
TRINITY_DN11338_c0_g1	GAW09905.1	ubiquinol-cytochrome c reductase complex core protein 2 [Lentinula edodes]	Lentinula_edodes	100	3.3e-59
TRINITY_DN11338_c0_g3	GAW09905.1	ubiquinol-cytochrome c reductase complex core protein 2 [Lentinula edodes]	Lentinula_edodes	98.6	1.2e-29
TRINITY_DN11362_c0_g1	GAW01822.1	hypothetical protein LENED_003439 [Lentinula edodes]	Lentinula_edodes	98.2	9.8e-53
TRINITY_DN1137_c0_g1	GAW08002.1	testis-expressed sequence 10 protein [Lentinula edodes]	Lentinula_edodes	98.5	4.1e-65
TRINITY_DN11385_c0_g1	GAW02031.1	60S ribosomal protein L37 [Lentinula edodes]	Lentinula_edodes	100	6e-34
TRINITY_DN11392_c0_g1	GAW00988.1	hypothetical protein LENED_002553 [Lentinula edodes]	Lentinula_edodes	100	3.1e-54
TRINITY_DN11398_c0_g1	BAF56679.1	CIPA [Lentinula edodes]	Lentinula_edodes	100	6.8e-40
TRINITY_DN11406_c0_g1	GAW06931.1	nadh-ubiquinone oxidoreductase 105 kda subunit [Lentinula edodes]	Lentinula_edodes	96.3	3e-37
TRINITY_DN11411_c0_g1	GAW06923.1	hypothetical protein LENED_008879 [Lentinula edodes]	Lentinula_edodes	100	1.1e-29
TRINITY_DN11413_c0_g2	GAW02669.1	aromatic peroxygenase partial [Lentinula edodes]	Lentinula_edodes	100	1.3e-16
TRINITY_DN11428_c0_g1	GAV98887.1	elongation factor EF-2 [Lentinula edodes]	Lentinula_edodes	100	6.4e-77
TRINITY_DN11439_c0_g1	GAW02328.1	eukaryotic translation initiation factor 1 [Lentinula edodes]	Lentinula_edodes	97.3	6.8e-56
TRINITY_DN11535_c0_g1	GAW01026.1	ornithine acetyltransferase [Lentinula edodes]	Lentinula_edodes	100	1.9e-43
TRINITY_DN11551_c0_g1	GAW09446.1	glycosyltransferase family 2 protein [Lentinula edodes]	Lentinula_edodes	100	8.8e-36
TRINITY_DN11557_c0_g1	BAF42042.1	fasciclin-like protein [Lentinula edodes]	Lentinula_edodes	99.5	8.8e-77
TRINITY_DN11572_c0_g1	GAW07366.1	hypothetical protein LENED_009353 [Lentinula edodes]	Lentinula_edodes	100	1.6e-41
TRINITY_DN11572_c0_g2	GAW07366.1	hypothetical protein LENED_009353 [Lentinula edodes]	Lentinula_edodes	100	1.5e-55
TRINITY_DN11584_c0_g1	GAW06202.1	hypothetical protein LENED_008105 [Lentinula edodes]	Lentinula_edodes	100	7.4e-88
TRINITY_DN11652_c0_g1	GAW04330.1	pro41 protein [Lentinula edodes]	Lentinula_edodes	100	1e-79
TRINITY_DN11656_c0_g1	GAW05878.1	hypothetical protein LENED_007764 [Lentinula edodes]	Lentinula_edodes	100	8.9e-42
TRINITY_DN11658_c0_g1	GAW08089.1	salicylate hydroxylase [Lentinula edodes]	Lentinula_edodes	100	5.5e-85
TRINITY_DN11658_c0_g2	GAW08089.1	salicylate hydroxylase [Lentinula edodes]	Lentinula_edodes	100	2.1e-61
TRINITY_DN11663_c0_g1	GAW06062.1	general substrate transporter [Lentinula edodes]	Lentinula_edodes	100	1.7e-40
TRINITY_DN11688_c0_g1	GAW02208.1	hypothetical protein LENED_003845 [Lentinula edodes]	Lentinula_edodes	98.2	1.7e-20
TRINITY_DN11688_c0_g2	GAW02208.1	hypothetical protein LENED_003845 [Lentinula edodes]	Lentinula_edodes	100	2.3e-44
TRINITY_DN116_c0_g1	Q870G5.1	RecName: Full=Guanine nucleotide-binding protein subunit gamma; Flags: Precursor	Lentinula_edodes	100	6.8e-06
TRINITY_DN11718_c0_g1	GAW06605.1	Calreticulin-domain-containing protein [Lentinula edodes]	Lentinula_edodes	100	2.2e-80
TRINITY_DN11734_c0_g1	GAW01244.1	acetyl- acetyl transferase [Lentinula edodes]	Lentinula_edodes	95.6	6.8e-216
TRINITY_DN11746_c0_g1	GAW07684.1	vesicle transport v-snare protein vti1 [Lentinula edodes]	Lentinula_edodes	99.3	1.8e-67
TRINITY_DN11750_c0_g1	GAW05463.1	glycoside hydrolase family 61 protein [Lentinula edodes]	Lentinula_edodes	100	1.9e-12
TRINITY_DN11750_c0_g2	GAW05463.1	glycoside hydrolase family 61 protein [Lentinula edodes]	Lentinula_edodes	100	3.2e-97
TRINITY_DN11761_c0_g1	GAW02721.1	hypothetical protein LENED_004389 [Lentinula edodes]	Lentinula_edodes	86.5	3.4e-106
TRINITY_DN11775_c0_g1	GAV99558.1	succinate-semialdehyde dehydrogenase [Lentinula edodes]	Lentinula_edodes	98.9	2.4e-43
TRINITY_DN11775_c0_g2	GAV99558.1	succinate-semialdehyde dehydrogenase [Lentinula edodes]	Lentinula_edodes	100	2.9e-30
TRINITY_DN11836_c0_g1	GAW05759.1	hypothetical protein LENED_007637 [Lentinula edodes]	Lentinula_edodes	92.5	1.5e-61
TRINITY_DN11881_c0_g1	GAW09609.1	heat shock protein 70 [Lentinula edodes]	Lentinula_edodes	100	7.5e-08
TRINITY_DN11881_c0_g2	GAW09609.1	heat shock protein 70 [Lentinula edodes]	Lentinula_edodes	100	4.8e-31
TRINITY_DN11881_c0_g3	GAW09609.1	heat shock protein 70 [Lentinula edodes]	Lentinula_edodes	100	1.1e-52
TRINITY_DN11885_c0_g1	GAW10354.1	hypothetical protein LENED_012612 [Lentinula edodes]	Lentinula_edodes	97.7	1.3e-79
TRINITY_DN11886_c0_g3	GAV99005.1	alpha beta-hydrolase [Lentinula edodes]	Lentinula_edodes	100	2.1e-56
TRINITY_DN11886_c0_g4	GAV99005.1	alpha beta-hydrolase [Lentinula edodes]	Lentinula_edodes	100	1.2e-41
TRINITY_DN11900_c0_g1	GAW06001.1	5-methyltetrahydropteroyltriglutamate-homocysteine s-methyltransferase [Lentinula edodes]	Lentinula_edodes	100	3.2e-33
TRINITY_DN11900_c0_g2	GAW06001.1	5-methyltetrahydropteroyltriglutamate-homocysteine s-methyltransferase [Lentinula edodes]	Lentinula_edodes	100	2.3e-44
TRINITY_DN11900_c0_g3	GAW06001.1	5-methyltetrahydropteroyltriglutamate-homocysteine s-methyltransferase [Lentinula edodes]	Lentinula_edodes	100	1.9e-97
TRINITY_DN11908_c0_g1	GAW10293.1	proteophosphoglycan ppg4 [Lentinula edodes]	Lentinula_edodes	93.5	1.6e-16
TRINITY_DN11908_c0_g2	GAW10293.1	proteophosphoglycan ppg4 [Lentinula edodes]	Lentinula_edodes	75.9	1.2e-12
TRINITY_DN1190_c0_g1	GAW01550.1	protease propeptide inhibitor [Lentinula edodes]	Lentinula_edodes	100	1.1e-34
TRINITY_DN11910_c0_g1	GAW06983.1	Oxidoreductase HTATIP2 [Lentinula edodes]	Lentinula_edodes	100	3.5e-45
TRINITY_DN11912_c0_g1	GAW04809.1	60S ribosomal protein L19 [Lentinula edodes]	Lentinula_edodes	100	9.2e-92
TRINITY_DN11930_c0_g1	GAW00560.1	glutaryl- dehydrogenase [Lentinula edodes]	Lentinula_edodes	100	3.1e-52
TRINITY_DN11950_c0_g1	GAW05974.1	glycerol kinase [Lentinula edodes]	Lentinula_edodes	100	4.1e-71
TRINITY_DN11950_c0_g2	GAW05974.1	glycerol kinase [Lentinula edodes]	Lentinula_edodes	100	2.4e-68
TRINITY_DN11960_c0_g1	GAW01864.1	hypothetical protein LENED_003485 [Lentinula edodes]	Lentinula_edodes	83.6	6.4e-46
TRINITY_DN1197_c0_g1	GAW00318.1	ribosomal protein l12 [Lentinula edodes]	Lentinula_edodes	100	4e-56
TRINITY_DN11996_c0_g1	GAW02756.1	carbohydrate-binding module family 13 protein [Lentinula edodes]	Lentinula_edodes	94.6	3.9e-67
TRINITY_DN12015_c0_g1	GAW10503.1	hypothetical protein LENED_012779 [Lentinula edodes]	Lentinula_edodes	98.6	1.5e-31
TRINITY_DN120_c0_g1	GAV98999.1	zf-U1-domain-containing protein [Lentinula edodes]	Lentinula_edodes	100	5.1e-52
TRINITY_DN12132_c0_g1	GAW02972.1	mnn4-regulates the mannosylphosphorylation [Lentinula edodes]	Lentinula_edodes	98.9	2.2e-41
TRINITY_DN12132_c0_g2	GAW04994.1	mnn4-regulates the mannosylphosphorylation [Lentinula edodes]	Lentinula_edodes	87.3	8.8e-33
TRINITY_DN12138_c0_g1	GAW09951.1	hypothetical protein LENED_012170 [Lentinula edodes]	Lentinula_edodes	94.9	9.3e-68
TRINITY_DN12165_c0_g1	GAW03491.1	plasma-membrane proton-e [Lentinula edodes]	Lentinula_edodes	100	1.1e-138
TRINITY_DN12165_c0_g2	GAW03491.1	plasma-membrane proton-e [Lentinula edodes]	Lentinula_edodes	100	1.6e-64
TRINITY_DN12199_c0_g1	GAW02139.1	dna binding protein ncp1 [Lentinula edodes]	Lentinula_edodes	100	5.8e-31
TRINITY_DN12199_c0_g2	GAW02139.1	dna binding protein ncp1 [Lentinula edodes]	Lentinula_edodes	96.8	8.5e-44
TRINITY_DN121_c0_g1	BAD11818.1	riboflavin aldehyde-forming enzyme [Lentinula edodes]	Lentinula_edodes	100	1.3e-76
TRINITY_DN12225_c0_g1	GAW00956.1	Catalase [Lentinula edodes]	Lentinula_edodes	100	1.9e-73
TRINITY_DN12238_c0_g1	GAW02253.1	e3 ubiquitin-protein ligase rnf13-like [Lentinula edodes]	Lentinula_edodes	98.7	2.7e-35
TRINITY_DN12255_c0_g2	GAW03963.1	glycoside hydrolase family 31 protein [Lentinula edodes]	Lentinula_edodes	97.8	4.4e-42
TRINITY_DN1225_c0_g1	GAW01394.1	glycosyltransferase family 35 protein [Lentinula edodes]	Lentinula_edodes	100	6.9e-32
TRINITY_DN12260_c0_g1	GAW10307.1	copper chaperone taha [Lentinula edodes]	Lentinula_edodes	100	4.3e-36
TRINITY_DN12276_c0_g2	GAV99142.1	transcription initiation factor tfiid subunit 9 [Lentinula edodes]	Lentinula_edodes	100	1.3e-27
TRINITY_DN1227_c0_g1	GAW09916.1	MFS general substrate transporter [Lentinula edodes]	Lentinula_edodes	100	1.1e-33
TRINITY_DN12284_c0_g1	GAW08238.1	stress-induced-phosphoprotein 1 [Lentinula edodes]	Lentinula_edodes	100	2.5e-49
TRINITY_DN12284_c0_g2	GAW08238.1	stress-induced-phosphoprotein 1 [Lentinula edodes]	Lentinula_edodes	100	3e-27
TRINITY_DN12289_c0_g1	GAW06657.1	fatty acid-2 hydroxylase [Lentinula edodes]	Lentinula_edodes	100	4e-39
TRINITY_DN12289_c0_g2	GAW06657.1	fatty acid-2 hydroxylase [Lentinula edodes]	Lentinula_edodes	100	1.9e-58
TRINITY_DN12301_c0_g1	GAW09714.1	heat shock protein 60 [Lentinula edodes]	Lentinula_edodes	100	5.8e-39
TRINITY_DN12301_c1_g1	GAW09714.1	heat shock protein 60 [Lentinula edodes]	Lentinula_edodes	100	1.9e-33
TRINITY_DN12304_c0_g1	GAW07503.1	na+ h+ exchanger 1 [Lentinula edodes]	Lentinula_edodes	98.3	1.6e-52
TRINITY_DN12305_c0_g1	GAW03688.1	protein transporter SEC9 [Lentinula edodes]	Lentinula_edodes	100	1.1e-43
TRINITY_DN12311_c0_g2	GAW05484.1	MFS general substrate transporter [Lentinula edodes]	Lentinula_edodes	86.7	1.2e-36
TRINITY_DN12311_c0_g3	GAW05484.1	MFS general substrate transporter [Lentinula edodes]	Lentinula_edodes	98.2	8.9e-25
TRINITY_DN12341_c0_g1	GAW00427.1	mfs transporter [Lentinula edodes]	Lentinula_edodes	98.9	2.8e-36
TRINITY_DN12356_c0_g1	GAW06092.1	NADPH oxidase isoform 1 [Lentinula edodes]	Lentinula_edodes	100	2.3e-59
TRINITY_DN12364_c0_g1	GAW00276.1	glycoside hydrolase family 30 protein [Lentinula edodes]	Lentinula_edodes	97.9	6.2e-16
TRINITY_DN12364_c0_g2	GAW00276.1	glycoside hydrolase family 30 protein [Lentinula edodes]	Lentinula_edodes	100	1.2e-70
TRINITY_DN12364_c0_g3	GAW00276.1	glycoside hydrolase family 30 protein [Lentinula edodes]	Lentinula_edodes	99.3	1.2e-75
TRINITY_DN12411_c0_g1	GAW00344.1	splicing factor u2af subunit [Lentinula edodes]	Lentinula_edodes	100	1.8e-43
TRINITY_DN12430_c0_g1	GAW00420.1	alpha beta [Lentinula edodes]	Lentinula_edodes	100	4.7e-53
TRINITY_DN12454_c0_g1	GAW03925.1	1 concanamycin induced protein c [Lentinula edodes]	Lentinula_edodes	100	9.7e-54
TRINITY_DN12459_c0_g1	GAW04830.1	Septin [Lentinula edodes]	Lentinula_edodes	100	9.7e-73
TRINITY_DN12459_c0_g2	GAW04830.1	Septin [Lentinula edodes]	Lentinula_edodes	100	2.3e-137
TRINITY_DN12475_c0_g1	GAW10625.1	cytochrome c peroxidase [Lentinula edodes]	Lentinula_edodes	93.1	2e-134
TRINITY_DN12475_c0_g2	GAW10625.1	cytochrome c peroxidase [Lentinula edodes]	Lentinula_edodes	100	2.9e-32
TRINITY_DN12478_c0_g1	GAW04153.1	hypothetical protein LENED_005927 [Lentinula edodes]	Lentinula_edodes	77.2	6.6e-18
TRINITY_DN12496_c0_g1	GAW00062.1	MFS general substrate transporter [Lentinula edodes]	Lentinula_edodes	99.6	4.4e-146
TRINITY_DN12507_c0_g1	GAW09288.1	thioredoxin [Lentinula edodes]	Lentinula_edodes	100	8.8e-55
TRINITY_DN12528_c0_g1	GAW09973.1	hypothetical protein LENED_012193 [Lentinula edodes]	Lentinula_edodes	100	1.5e-38
TRINITY_DN12560_c0_g1	GAW08037.1	Ureohydrolase [Lentinula edodes]	Lentinula_edodes	99.1	1.8e-199
TRINITY_DN12572_c0_g1	GAW03151.1	hypothetical protein LENED_004852 [Lentinula edodes]	Lentinula_edodes	97.6	1.8e-37
TRINITY_DN125_c0_g1	GAW03062.1	hypothetical protein LENED_004752 [Lentinula edodes]	Lentinula_edodes	100	1.2e-18
TRINITY_DN12606_c0_g1	GAW05567.1	rho small monomeric gtpase [Lentinula edodes]	Lentinula_edodes	100	2.8e-127
TRINITY_DN12633_c0_g1	GAW05867.1	PLP-dependent transferase [Lentinula edodes]	Lentinula_edodes	92.2	1.8e-265
TRINITY_DN12657_c0_g1	GAW00828.1	cytochrome b5 [Lentinula edodes]	Lentinula_edodes	96.1	2.3e-62
TRINITY_DN12666_c0_g1	GAW07369.1	plasma membrane proteolipid protein [Lentinula edodes]	Lentinula_edodes	100	3.7e-49
TRINITY_DN12724_c0_g1	GAW00351.1	phosphoenolpyruvate carboxykinase [Lentinula edodes]	Lentinula_edodes	100	1.6e-63
TRINITY_DN12724_c0_g2	GAW00351.1	phosphoenolpyruvate carboxykinase [Lentinula edodes]	Lentinula_edodes	100	3.4e-38
TRINITY_DN12724_c0_g3	GAW00351.1	phosphoenolpyruvate carboxykinase [Lentinula edodes]	Lentinula_edodes	100	1.3e-46
TRINITY_DN12724_c0_g4	GAW00351.1	phosphoenolpyruvate carboxykinase [Lentinula edodes]	Lentinula_edodes	99.6	3.1e-146
TRINITY_DN12748_c0_g1	GAW06068.1	helix-turn-helix transcription type [Lentinula edodes]	Lentinula_edodes	78	7.2e-19
TRINITY_DN12760_c0_g1	GAW01204.1	GTP-binding nuclear protein RAN [Lentinula edodes]	Lentinula_edodes	100	2.6e-81
TRINITY_DN12789_c0_g1	GAW04331.1	hypothetical protein LENED_006112 [Lentinula edodes]	Lentinula_edodes	100	5.8e-52
TRINITY_DN12798_c0_g1	GAW03868.1	benzoate 4-monooxygenase cytochrome p450 [Lentinula edodes]	Lentinula_edodes	88.3	8.7e-83
TRINITY_DN12798_c0_g3	GAW03868.1	benzoate 4-monooxygenase cytochrome p450 [Lentinula edodes]	Lentinula_edodes	97.8	1.2e-46
TRINITY_DN12821_c0_g2	GAW00801.1	14-3-3 protein [Lentinula edodes]	Lentinula_edodes	100	4.1e-141
TRINITY_DN12826_c0_g1	GAW01151.1	MFS general substrate transporter [Lentinula edodes]	Lentinula_edodes	100	6.4e-27
TRINITY_DN12832_c0_g1	GAW00225.1	hypothetical protein LENED_001727 [Lentinula edodes]	Lentinula_edodes	100	4.4e-15
TRINITY_DN12848_c0_g1	GAW01896.1	RNA-binding domain-containing protein [Lentinula edodes]	Lentinula_edodes	100	8.6e-11
TRINITY_DN12848_c0_g2	GAW01896.1	RNA-binding domain-containing protein [Lentinula edodes]	Lentinula_edodes	100	6.7e-48
TRINITY_DN12848_c0_g3	GAW01896.1	RNA-binding domain-containing protein [Lentinula edodes]	Lentinula_edodes	100	5e-27
TRINITY_DN12850_c0_g1	GAW02322.1	heat-shock protein 90 [Lentinula edodes]	Lentinula_edodes	99.9	0
TRINITY_DN12851_c0_g1	GAV99367.1	leucine-rich protein [Lentinula edodes]	Lentinula_edodes	100	8.4e-35
TRINITY_DN12878_c0_g1	GAW03733.1	mitochondrial carrier [Lentinula edodes]	Lentinula_edodes	100	6.1e-173
TRINITY_DN12884_c0_g2	GAV99100.1	hypothetical protein LENED_000532 [Lentinula edodes]	Lentinula_edodes	77.5	1.3e-39
TRINITY_DN12907_c0_g1	GAW02965.1	member of major facilitator superfamily multidrug- dha1 sub-family [Lentinula edodes]	Lentinula_edodes	97.1	3.9e-50
TRINITY_DN12907_c0_g2	GAW02965.1	member of major facilitator superfamily multidrug- dha1 sub-family [Lentinula edodes]	Lentinula_edodes	100	3e-30
TRINITY_DN12907_c0_g3	GAW02965.1	member of major facilitator superfamily multidrug- dha1 sub-family [Lentinula edodes]	Lentinula_edodes	100	1.4e-65
TRINITY_DN12907_c0_g4	GAW02965.1	member of major facilitator superfamily multidrug- dha1 sub-family [Lentinula edodes]	Lentinula_edodes	100	1.2e-37
TRINITY_DN12927_c0_g1	GAW03803.1	CPS1 protein [Lentinula edodes]	Lentinula_edodes	100	9.1e-102
TRINITY_DN12933_c0_g1	GAW05939.1	indoleamine -dioxygenase family protein [Lentinula edodes]	Lentinula_edodes	99.6	5.5e-275
TRINITY_DN12962_c0_g1	GAW01669.1	phosphoric monoester hydrolase [Lentinula edodes]	Lentinula_edodes	100	4e-36
TRINITY_DN12962_c0_g2	GAW01669.1	phosphoric monoester hydrolase [Lentinula edodes]	Lentinula_edodes	100	7.9e-50
TRINITY_DN12964_c0_g1	GAW01312.1	alpha beta-hydrolase [Lentinula edodes]	Lentinula_edodes	100	3.1e-36
TRINITY_DN12964_c0_g3	GAW01313.1	alpha beta-hydrolase [Lentinula edodes]	Lentinula_edodes	96.2	3e-33
TRINITY_DN1298_c0_g2	GAV98914.1	60s ribosomal protein l6 [Lentinula edodes]	Lentinula_edodes	99	6.3e-37
TRINITY_DN12999_c0_g1	GAW05779.1	spore wall assembly -related protein [Lentinula edodes]	Lentinula_edodes	98.7	2.2e-33
TRINITY_DN13012_c0_g1	GAW08338.1	hypothetical protein LENED_010394 [Lentinula edodes]	Lentinula_edodes	94.9	1.6e-20
TRINITY_DN13012_c0_g2	GAW08338.1	hypothetical protein LENED_010394 [Lentinula edodes]	Lentinula_edodes	80.3	6.2e-17
TRINITY_DN13012_c0_g3	GAW08338.1	hypothetical protein LENED_010394 [Lentinula edodes]	Lentinula_edodes	100	3.8e-21
TRINITY_DN1303_c0_g1	GAW09518.1	dna polymerase delta catalytic subunit [Lentinula edodes]	Lentinula_edodes	100	3.6e-55
TRINITY_DN13051_c0_g1	GAW01318.1	wsc domain-containing protein [Lentinula edodes]	Lentinula_edodes	98.9	3.2e-44
TRINITY_DN13064_c0_g1	GAV98645.1	hypothetical protein LENED_000035 [Lentinula edodes]	Lentinula_edodes	82.4	4.1e-29
TRINITY_DN13064_c0_g2	GAV98645.1	hypothetical protein LENED_000035 [Lentinula edodes]	Lentinula_edodes	99.1	2.4e-55
TRINITY_DN13064_c0_g3	GAV98645.1	hypothetical protein LENED_000035 [Lentinula edodes]	Lentinula_edodes	100	2e-54
TRINITY_DN13077_c0_g1	GAW03686.1	expansin family protein [Lentinula edodes]	Lentinula_edodes	95.8	3.6e-20
TRINITY_DN13085_c0_g1	GAW10160.1	acetylornithine aminotransferase [Lentinula edodes]	Lentinula_edodes	98.6	3.2e-32
TRINITY_DN13085_c0_g2	GAW10160.1	acetylornithine aminotransferase [Lentinula edodes]	Lentinula_edodes	100	1.5e-32
TRINITY_DN13096_c0_g1	GAW02255.1	heme oxygenase [Lentinula edodes]	Lentinula_edodes	100	4.5e-31
TRINITY_DN13096_c0_g2	GAW02255.1	heme oxygenase [Lentinula edodes]	Lentinula_edodes	100	5.5e-49
TRINITY_DN13104_c0_g2	GAW00996.1	siderophore biosynthesis regulatory protein [Lentinula edodes]	Lentinula_edodes	99.5	4.6e-100
TRINITY_DN13109_c0_g1	GAW01959.1	mitochondrial processing peptidase beta subunit [Lentinula edodes]	Lentinula_edodes	100	1.1e-49
TRINITY_DN13115_c0_g1	GAW04032.1	hypothetical protein LENED_005796 [Lentinula edodes]	Lentinula_edodes	100	2.4e-65
TRINITY_DN13115_c0_g2	GAW04032.1	hypothetical protein LENED_005796 [Lentinula edodes]	Lentinula_edodes	95.3	3.8e-49
TRINITY_DN13115_c0_g3	GAW04032.1	hypothetical protein LENED_005796 [Lentinula edodes]	Lentinula_edodes	99.3	1.9e-82
TRINITY_DN13118_c0_g1	GAW07840.1	LOW QUALITY PROTEIN: E3 ubiquitin-protein ligase TTC3 [Lentinula edodes]	Lentinula_edodes	97.3	1.9e-11
TRINITY_DN13145_c0_g1	GAW06751.1	ornithine aminotransferase [Lentinula edodes]	Lentinula_edodes	100	3.4e-35
TRINITY_DN13145_c0_g2	GAW06751.1	ornithine aminotransferase [Lentinula edodes]	Lentinula_edodes	100	3.3e-38
TRINITY_DN13166_c0_g1	GAW04337.1	glycoside hydrolase family 16 protein [Lentinula edodes]	Lentinula_edodes	100	7.7e-37
TRINITY_DN13166_c0_g2	GAW04337.1	glycoside hydrolase family 16 protein [Lentinula edodes]	Lentinula_edodes	100	1.2e-84
TRINITY_DN13189_c0_g1	GAW02971.1	MFS general substrate transporter [Lentinula edodes]	Lentinula_edodes	97.7	1.5e-238
TRINITY_DN13194_c0_g1	GAW05725.1	HSP20-like chaperone [Lentinula edodes]	Lentinula_edodes	96.3	1.8e-95
TRINITY_DN13197_c0_g1	GAW03760.1	Clavaminate synthase-like protein [Lentinula edodes]	Lentinula_edodes	100	4e-100
TRINITY_DN13197_c0_g2	GAW03760.1	Clavaminate synthase-like protein [Lentinula edodes]	Lentinula_edodes	98.9	1.1e-48
TRINITY_DN13197_c0_g3	GAW03760.1	Clavaminate synthase-like protein [Lentinula edodes]	Lentinula_edodes	99.1	7.5e-58
TRINITY_DN13224_c0_g2	GAW06149.1	immunoreactive mannoprotein MP88 [Lentinula edodes]	Lentinula_edodes	100	2.5e-36
TRINITY_DN1322_c0_g1	GAW09299.1	hypothetical protein LENED_011448 [Lentinula edodes]	Lentinula_edodes	99.4	1.2e-87
TRINITY_DN13235_c0_g1	GAW10421.1	hypothetical protein LENED_012682 [Lentinula edodes]	Lentinula_edodes	99.3	4.9e-154
TRINITY_DN13259_c0_g1	GAW02897.1	hypothetical protein LENED_004577 [Lentinula edodes]	Lentinula_edodes	100	3.1e-71
TRINITY_DN13259_c0_g2	GAW02897.1	hypothetical protein LENED_004577 [Lentinula edodes]	Lentinula_edodes	99	1.4e-154
TRINITY_DN13266_c0_g1	GAW09885.1	protein [Lentinula edodes]	Lentinula_edodes	98.2	1e-25
TRINITY_DN13279_c0_g1	GAW04000.1	inorganic phosphate transporter [Lentinula edodes]	Lentinula_edodes	99.6	3.4e-292
TRINITY_DN13311_c0_g1	GAW02286.1	small heat shock protein [Lentinula edodes]	Lentinula_edodes	97.4	8.5e-77
TRINITY_DN13336_c0_g1	GAW04073.1	hypothetical protein LENED_005839 [Lentinula edodes]	Lentinula_edodes	95.9	5.7e-32
TRINITY_DN13339_c0_g1	GAW09256.1	hypothetical protein LENED_011401 [Lentinula edodes]	Lentinula_edodes	100	1.2e-138
TRINITY_DN13350_c0_g1	GAW03402.1	ubiquinol-cytochrome c reductase iron-sulfur subunit [Lentinula edodes]	Lentinula_edodes	100	2.4e-29
TRINITY_DN13357_c0_g1	GAW01364.1	fumarate reductase [Lentinula edodes]	Lentinula_edodes	100	3.5e-274
TRINITY_DN13368_c0_g1	GAV99124.1	small heat shock protein [Lentinula edodes]	Lentinula_edodes	100	9.9e-76
TRINITY_DN13370_c0_g1	GAW04920.1	hypothetical protein LENED_006744 [Lentinula edodes]	Lentinula_edodes	98	3.5e-48
TRINITY_DN13371_c0_g1	GAW03791.1	Got1 domain protein [Lentinula edodes]	Lentinula_edodes	71.2	9.1e-59
TRINITY_DN13394_c0_g1	GAW08386.1	dihydrolipoyl dehydrogenase [Lentinula edodes]	Lentinula_edodes	100	2.8e-122
TRINITY_DN13417_c0_g1	GAW00049.1	dual specificity [Lentinula edodes]	Lentinula_edodes	99.1	9.3e-52
TRINITY_DN13440_c0_g2	BAD51484.1	delta 12-fatty acid desaturase [Lentinula edodes]	Lentinula_edodes	98.8	8.6e-93
TRINITY_DN13447_c0_g1	GAW04206.1	ubiquitin-like protein 3-like [Lentinula edodes]	Lentinula_edodes	99.4	7.9e-93
TRINITY_DN13486_c0_g2	GAW05978.1	alpha subunit of the F1 sector of mitochondrial F1F0 ATP [Lentinula edodes]	Lentinula_edodes	100	6.8e-41
TRINITY_DN13495_c0_g1	GAW00107.1	Protein rot1 [Lentinula edodes]	Lentinula_edodes	85.5	2.5e-71
TRINITY_DN13500_c0_g1	GAW05682.1	carbohydrate-binding module family 50 protein [Lentinula edodes]	Lentinula_edodes	100	1.3e-73
TRINITY_DN13504_c0_g1	GAW03675.1	hypothetical protein LENED_005415 [Lentinula edodes]	Lentinula_edodes	82.4	6.9e-11
TRINITY_DN13524_c0_g1	GAW01998.1	hypothetical protein LENED_003624 [Lentinula edodes]	Lentinula_edodes	100	5.1e-44
TRINITY_DN13532_c0_g1	GAW09218.1	gmc oxidoreductase [Lentinula edodes]	Lentinula_edodes	99.6	0
TRINITY_DN13552_c0_g1	GAW10269.1	anthranilate synthase [Lentinula edodes]	Lentinula_edodes	98.2	8.2e-82
TRINITY_DN13552_c0_g2	GAW10269.1	anthranilate synthase [Lentinula edodes]	Lentinula_edodes	99.3	2.1e-230
TRINITY_DN13557_c0_g1	GAW10302.1	hypothetical protein LENED_012555 [Lentinula edodes]	Lentinula_edodes	100	6.2e-51
TRINITY_DN13561_c0_g1	BAH80443.1	putative chitin deacetylase [Lentinula edodes]	Lentinula_edodes	100	1.5e-224
TRINITY_DN13574_c0_g1	GAW02220.1	isocitrate lyase [Lentinula edodes]	Lentinula_edodes	99.8	0
TRINITY_DN13576_c0_g1	GAW07955.1	related to DDR48-Heat shock protein [Lentinula edodes]	Lentinula_edodes	71.4	6.9e-52
TRINITY_DN13577_c0_g1	GAW06624.1	syntaxin-like protein [Lentinula edodes]	Lentinula_edodes	97.4	8.1e-147
TRINITY_DN13579_c0_g1	GAW10650.1	carbohydrate-binding module family 50 protein [Lentinula edodes]	Lentinula_edodes	100	1.4e-72
TRINITY_DN13587_c0_g1	GAW09167.1	hypothetical protein LENED_011301 [Lentinula edodes]	Lentinula_edodes	94.4	2.8e-60
TRINITY_DN13592_c0_g2	GAW03750.1	NAD -binding protein [Lentinula edodes]	Lentinula_edodes	91.1	6.4e-20
TRINITY_DN13619_c0_g1	GAW08400.1	hypothetical protein LENED_010458 [Lentinula edodes]	Lentinula_edodes	97	3.4e-10
TRINITY_DN13623_c0_g1	GAW08828.1	serine-type endopeptidase [Lentinula edodes]	Lentinula_edodes	100	5.2e-276
TRINITY_DN13686_c0_g1	GAW06665.1	elongation factor 3 [Lentinula edodes]	Lentinula_edodes	100	0
TRINITY_DN13701_c0_g1	GAW07382.1	hypothetical protein LENED_009369 [Lentinula edodes]	Lentinula_edodes	99.7	1.1e-206
TRINITY_DN13752_c0_g1	GAW03586.1	f-box and fnip repeat-containing protein [Lentinula edodes]	Lentinula_edodes	98.5	3.9e-48
TRINITY_DN13773_c0_g1	GAW09852.1	hypothetical protein LENED_012052 [Lentinula edodes]	Lentinula_edodes	100	1.4e-88
TRINITY_DN13780_c0_g1	GAW05501.1	hypothetical protein LENED_007363 [Lentinula edodes]	Lentinula_edodes	98.8	5e-37
TRINITY_DN13797_c0_g1	GAW03257.1	aspartic peptidase a1 [Lentinula edodes]	Lentinula_edodes	100	4.9e-78
TRINITY_DN13797_c0_g2	GAW03257.1	aspartic peptidase a1 [Lentinula edodes]	Lentinula_edodes	100	7.1e-83
TRINITY_DN13797_c0_g3	GAW03257.1	aspartic peptidase a1 [Lentinula edodes]	Lentinula_edodes	100	7e-44
TRINITY_DN13799_c0_g11	GAW05977.1	ATP synthase F1 alpha subunit [Lentinula edodes]	Lentinula_edodes	100	1.2e-108
TRINITY_DN13823_c0_g1	GAW09917.1	cross-pathway control protein [Lentinula edodes]	Lentinula_edodes	100	6e-145
TRINITY_DN13849_c0_g1	GAV99690.1	NADP+-dependent D-mannitol dehydrogenase [Lentinula edodes]	Lentinula_edodes	100	9.8e-203
TRINITY_DN13870_c0_g1	GAV99060.1	hypothetical protein LENED_000490 [Lentinula edodes]	Lentinula_edodes	100	1.7e-92
TRINITY_DN13878_c0_g1	GAW00582.1	malic enzyme [Lentinula edodes]	Lentinula_edodes	99.8	0
TRINITY_DN13894_c0_g1	GAW00065.1	hypothetical protein LENED_001557 [Lentinula edodes]	Lentinula_edodes	100	2e-140
TRINITY_DN13896_c0_g1	GAW09722.1	Non-catalytic module family EXPN protein [Lentinula edodes]	Lentinula_edodes	100	1.6e-119
TRINITY_DN13917_c0_g2	GAW04585.1	alcohol oxidase [Lentinula edodes]	Lentinula_edodes	93.6	1.6e-191
TRINITY_DN13943_c0_g1	GAW06167.1	hypothetical protein LENED_008070 [Lentinula edodes]	Lentinula_edodes	96.9	3.2e-65
TRINITY_DN1394_c0_g1	GAW08312.1	60S ribosomal protein L11 [Lentinula edodes]	Lentinula_edodes	100	7e-89
TRINITY_DN13966_c0_g1	GAW06567.1	hypothetical protein LENED_008501 [Lentinula edodes]	Lentinula_edodes	99.7	5.1e-160
TRINITY_DN13969_c0_g1	GAW03742.1	phosphopyruvate hydratase [Lentinula edodes]	Lentinula_edodes	100	1.4e-251
TRINITY_DN13990_c0_g2	GAW09547.1	hypothetical protein LENED_011709 [Lentinula edodes]	Lentinula_edodes	87.8	1.7e-147
TRINITY_DN13993_c0_g1	GAW00312.1	cofactor-independent phosphoglycerate mutase [Lentinula edodes]	Lentinula_edodes	100	1.7e-306
TRINITY_DN14008_c0_g1	GAW08003.1	translation initiation factor 3 subunit 3 [Lentinula edodes]	Lentinula_edodes	99.3	3.9e-98
TRINITY_DN14036_c0_g1	GAW00401.1	hypothetical protein LENED_001917 [Lentinula edodes]	Lentinula_edodes	99.7	2.5e-119
TRINITY_DN14069_c1_g6	GAW08723.1	histone H2A [Lentinula edodes]	Lentinula_edodes	98.9	9.2e-29
TRINITY_DN14074_c0_g1	GAW05497.1	membrane protein [Lentinula edodes]	Lentinula_edodes	98.9	2.2e-142
TRINITY_DN14076_c2_g1	GAW03936.1	tubulin beta chain [Lentinula edodes]	Lentinula_edodes	100	1.2e-72
TRINITY_DN14076_c2_g8	GAW03936.1	tubulin beta chain [Lentinula edodes]	Lentinula_edodes	100	7.4e-175
TRINITY_DN14139_c2_g10	GAW06605.1	Calreticulin-domain-containing protein [Lentinula edodes]	Lentinula_edodes	100	7.5e-17
TRINITY_DN14139_c2_g8	GAW06605.1	Calreticulin-domain-containing protein [Lentinula edodes]	Lentinula_edodes	100	5.6e-38
TRINITY_DN14140_c0_g1	GAV99692.1	60S ribosomal protein L44 [Lentinula edodes]	Lentinula_edodes	100	1.4e-54
TRINITY_DN14148_c0_g10	GAW09405.1	gtp-binding protein ypt5 [Lentinula edodes]	Lentinula_edodes	100	6e-100
TRINITY_DN14168_c0_g3	GAW09279.1	white collar 1 protein [Lentinula edodes]	Lentinula_edodes	100	1.6e-119
TRINITY_DN1419_c0_g1	GAW09283.1	60s ribosomal protein l31 [Lentinula edodes]	Lentinula_edodes	100	6e-54
TRINITY_DN14255_c0_g2	GAW05761.1	40s ribosomal protein s19 [Lentinula edodes]	Lentinula_edodes	100	9.1e-73
TRINITY_DN14280_c0_g1	BAH80457.1	putative mannanase [Lentinula edodes]	Lentinula_edodes	98.9	2.5e-100
TRINITY_DN14284_c1_g2	GAW05207.1	ribosomal protein S12 S23 [Lentinula edodes]	Lentinula_edodes	100	1.9e-76
TRINITY_DN1428_c0_g1	GAW06207.1	retinal short-chain dehydrogenase reductase [Lentinula edodes]	Lentinula_edodes	100	1.8e-32
TRINITY_DN1434_c0_g1	GAW02099.1	small gtpase-binding protein [Lentinula edodes]	Lentinula_edodes	100	9.2e-109
TRINITY_DN14364_c0_g2	GAW03997.1	hypothetical protein LENED_005759 [Lentinula edodes]	Lentinula_edodes	95	1e-55
TRINITY_DN1436_c0_g1	GAW03022.1	MFS general substrate transporter [Lentinula edodes]	Lentinula_edodes	99.3	5e-75
TRINITY_DN14388_c1_g1	GAW04435.1	membrane protein [Lentinula edodes]	Lentinula_edodes	100	5.2e-77
TRINITY_DN14388_c1_g13	GAW04435.1	membrane protein [Lentinula edodes]	Lentinula_edodes	100	2.1e-26
TRINITY_DN14419_c0_g1	GAW04537.1	acyl- carboxylate -transferase [Lentinula edodes]	Lentinula_edodes	99.3	0
TRINITY_DN14422_c0_g1	GAW05770.1	pyruvate decarboxylase [Lentinula edodes]	Lentinula_edodes	99.8	0
TRINITY_DN1445_c0_g1	GAW01757.1	hypothetical protein LENED_003368 [Lentinula edodes]	Lentinula_edodes	91.3	6.1e-25
TRINITY_DN14471_c0_g1	GAW08591.1	hypothetical protein LENED_010659 [Lentinula edodes]	Lentinula_edodes	87.7	1.6e-26
TRINITY_DN14545_c2_g8	GAW02593.1	ubiquitin-60S ribosomal protein L40 fusion protein [Lentinula edodes]	Lentinula_edodes	100	6.1e-67
TRINITY_DN14554_c0_g5	GAW03706.1	translation elongation factor 1a [Lentinula edodes]	Lentinula_edodes	99.6	2.4e-265
TRINITY_DN14615_c2_g7	GAW03321.1	glycine-rich rna binding protein [Lentinula edodes]	Lentinula_edodes	100	1.2e-37
TRINITY_DN14659_c0_g1	GAW02596.1	hypothetical protein LENED_004259 [Lentinula edodes]	Lentinula_edodes	100	2.7e-77
TRINITY_DN14669_c0_g1	AAG00901.1	hydrophobin 2 [Lentinula edodes]	Lentinula_edodes	100	2.5e-52
TRINITY_DN14687_c0_g1	GAW07426.1	cytochrome c oxidase biogenesis protein cmc1-like protein [Lentinula edodes]	Lentinula_edodes	100	1.3e-34
TRINITY_DN14760_c0_g1	GAW08011.1	NADH dehydrogenase 1 beta subcomplex subunit [Lentinula edodes]	Lentinula_edodes	100	7.3e-48
TRINITY_DN14817_c0_g1	GAW07117.1	translationally controlled tumor-associated [Lentinula edodes]	Lentinula_edodes	100	2.3e-87
TRINITY_DN14881_c0_g1	GAW08907.1	aspartic peptidase A1 [Lentinula edodes]	Lentinula_edodes	100	4.5e-204
TRINITY_DN14885_c0_g1	GAW03512.1	Pkinase-domain-containing protein [Lentinula edodes]	Lentinula_edodes	100	4.6e-105
TRINITY_DN14914_c0_g1	GAW08667.1	Clavaminate synthase-like protein [Lentinula edodes]	Lentinula_edodes	99.7	3e-206
TRINITY_DN14926_c0_g1	GAW08236.1	nadh dehydrogenase [Lentinula edodes]	Lentinula_edodes	100	9.4e-40
TRINITY_DN14928_c0_g1	GAW06155.1	fungal-specific transcription factor [Lentinula edodes]	Lentinula_edodes	98.8	1.2e-38
TRINITY_DN15001_c0_g1	GAW07336.1	manganese superoxide dismutase [Lentinula edodes]	Lentinula_edodes	100	5.6e-94
TRINITY_DN15011_c0_g1	GAW01985.1	acid protease [Lentinula edodes]	Lentinula_edodes	100	5.3e-282
TRINITY_DN15040_c0_g1	GAW03704.1	60s ribosomal protein l32 [Lentinula edodes]	Lentinula_edodes	100	2.8e-67
TRINITY_DN15041_c0_g1	GAW10275.1	protein phosphatase inhibitor containing protein [Lentinula edodes]	Lentinula_edodes	98.5	1.3e-30
TRINITY_DN15054_c0_g1	GAV98769.1	zz type zinc finger domain-containing protein [Lentinula edodes]	Lentinula_edodes	100	5.9e-115
TRINITY_DN15102_c0_g1	GAW07167.1	glycoside hydrolase family 61 protein [Lentinula edodes]	Lentinula_edodes	100	4.2e-24
TRINITY_DN15132_c0_g1	GAW06402.1	hypothetical protein LENED_008329 [Lentinula edodes]	Lentinula_edodes	90.1	1.8e-41
TRINITY_DN15136_c0_g1	GAW02963.1	iron reductase [Lentinula edodes]	Lentinula_edodes	100	4.2e-43
TRINITY_DN15170_c0_g1	GAW03389.1	hypothetical protein LENED_005115 [Lentinula edodes]	Lentinula_edodes	98.9	1.4e-100
TRINITY_DN15176_c0_g1	GAW06104.1	nadh-ubiquinone oxidoreductase 213 kda subunit [Lentinula edodes]	Lentinula_edodes	100	1.7e-57
TRINITY_DN15218_c0_g1	GAW04196.1	hypothetical protein LENED_005972 [Lentinula edodes]	Lentinula_edodes	100	8.2e-40
TRINITY_DN15221_c0_g1	GAW00062.1	MFS general substrate transporter [Lentinula edodes]	Lentinula_edodes	100	5.1e-45
TRINITY_DN15249_c0_g1	GAW07176.1	hypothetical protein LENED_009151 [Lentinula edodes]	Lentinula_edodes	100	6e-24
TRINITY_DN15284_c0_g1	GAW02562.1	programmed cell death protein 5 [Lentinula edodes]	Lentinula_edodes	93.3	2.4e-32
TRINITY_DN15286_c0_g1	GAW09714.1	heat shock protein 60 [Lentinula edodes]	Lentinula_edodes	100	4.4e-36
TRINITY_DN15289_c0_g1	GAW08443.1	membrane protein [Lentinula edodes]	Lentinula_edodes	100	9.9e-38
TRINITY_DN15330_c0_g1	GAW03438.1	MFS transporter [Lentinula edodes]	Lentinula_edodes	92.3	2.6e-295
TRINITY_DN15333_c0_g1	GAV99514.1	flavin-containing monooxygenase [Lentinula edodes]	Lentinula_edodes	98.5	1e-31
TRINITY_DN15344_c0_g1	AAT99286.1	laccase 1 AVT [Lentinula edodes]	Lentinula_edodes	99.8	0
TRINITY_DN15353_c0_g1	GAW03979.1	Isochorismatase hydrolase [Lentinula edodes]	Lentinula_edodes	99.6	2.6e-135
TRINITY_DN15374_c0_g1	GAW02159.1	ribosomal protein S25 [Lentinula edodes]	Lentinula_edodes	100	3.6e-47
TRINITY_DN15399_c0_g1	GAW05803.1	Conidiation-specific protein 6 [Lentinula edodes]	Lentinula_edodes	96.3	2.2e-35
TRINITY_DN15411_c0_g1	GAW09666.1	NAD-malate dehydrogenase [Lentinula edodes]	Lentinula_edodes	100	7.3e-184
TRINITY_DN15422_c0_g1	GAW08943.1	hypothetical protein LENED_011056 [Lentinula edodes]	Lentinula_edodes	100	2.4e-68
TRINITY_DN1549_c0_g1	GAW05173.1	histone h2b [Lentinula edodes]	Lentinula_edodes	100	1.1e-45
TRINITY_DN154_c0_g1	GAW06471.1	profilin [Lentinula edodes]	Lentinula_edodes	100	1.2e-42
TRINITY_DN15505_c0_g1	GAW03646.1	poxc laccase transcription factor [Lentinula edodes]	Lentinula_edodes	98.7	2.8e-81
TRINITY_DN15514_c0_g1	GAW04577.1	oxidase-like protein [Lentinula edodes]	Lentinula_edodes	97.6	9.1e-15
TRINITY_DN15569_c0_g1	GAW07420.1	myosin regulatory light chain cdc4 [Lentinula edodes]	Lentinula_edodes	100	2.2e-31
TRINITY_DN15590_c0_g1	GAW07996.1	acyl carrier protein [Lentinula edodes]	Lentinula_edodes	100	3.9e-54
TRINITY_DN15624_c0_g1	GAV99959.1	hypothetical protein LENED_001445 [Lentinula edodes]	Lentinula_edodes	96.1	1.2e-71
TRINITY_DN15628_c0_g1	GAW06766.1	WD40 repeat-like protein [Lentinula edodes]	Lentinula_edodes	100	7e-22
TRINITY_DN15675_c0_g1	GAW07428.1	ubiquinol-cytochrome-c reductase complex subunit 6 [Lentinula edodes]	Lentinula_edodes	100	5.5e-58
TRINITY_DN15684_c0_g1	GAW03524.1	nadh:ubiquinone oxidoreductase subunit [Lentinula edodes]	Lentinula_edodes	100	2.6e-44
TRINITY_DN1569_c0_g1	GAV99943.1	hypothetical protein LENED_001429 [Lentinula edodes]	Lentinula_edodes	98.7	7.2e-36
TRINITY_DN15702_c0_g1	GAW01661.1	hypothetical protein LENED_003271 [Lentinula edodes]	Lentinula_edodes	98.3	2.4e-139
TRINITY_DN15709_c0_g1	GAW06039.1	cyanide hydratase [Lentinula edodes]	Lentinula_edodes	100	3.4e-210
TRINITY_DN15711_c0_g1	GAW10615.1	major facilitator superfamily [Lentinula edodes]	Lentinula_edodes	100	1.5e-72
TRINITY_DN15808_c0_g1	GAW01049.1	ribosomal protein L23a [Lentinula edodes]	Lentinula_edodes	100	3.8e-57
TRINITY_DN15877_c0_g1	GAW03658.1	cerato-platanin 6 [Lentinula edodes]	Lentinula_edodes	100	3.5e-64
TRINITY_DN15909_c0_g1	GAW10659.1	amidohydrolase ytcJ [Lentinula edodes]	Lentinula_edodes	100	7.3e-35
TRINITY_DN15957_c0_g1	GAW04858.1	glycoside hydrolase family 61 protein [Lentinula edodes]	Lentinula_edodes	100	9.8e-31
TRINITY_DN15970_c0_g1	GAW07138.1	60S ribosomal protein L36 [Lentinula edodes]	Lentinula_edodes	100	4.3e-46
TRINITY_DN16011_c0_g1	GAW05215.1	hypothetical protein LENED_007056 [Lentinula edodes]	Lentinula_edodes	99.3	4.3e-68
TRINITY_DN16021_c0_g1	GAW03366.1	glycosyl hydrolase 53 domain-containing protein [Lentinula edodes]	Lentinula_edodes	99.6	2.8e-138
TRINITY_DN16036_c0_g1	GAW05346.1	ubiquitin-conjugating enzyme [Lentinula edodes]	Lentinula_edodes	100	1.5e-98
TRINITY_DN16048_c0_g1	GAW04079.1	chch domain protein [Lentinula edodes]	Lentinula_edodes	100	8.6e-57
TRINITY_DN1604_c0_g1	GAW08838.1	hypothetical protein LENED_010932 [Lentinula edodes]	Lentinula_edodes	92.2	1.9e-71
TRINITY_DN16050_c0_g1	GAW01798.1	cellular morphogenesis protein [Lentinula edodes]	Lentinula_edodes	100	6.5e-60
TRINITY_DN16067_c0_g1	AEN14430.1	conserved hypothetical protein [Lentinula edodes]	Lentinula_edodes	100	1.2e-29
TRINITY_DN1609_c0_g1	GAW06278.1	QCR10 subunit of the ubiqunol-cytochrome c oxidoreductase complex [Lentinula edodes]	Lentinula_edodes	100	4.5e-36
TRINITY_DN16104_c0_g1	GAW03022.1	MFS general substrate transporter [Lentinula edodes]	Lentinula_edodes	100	2.5e-70
TRINITY_DN16120_c0_g1	GAW05580.1	glutaredoxin domain protein [Lentinula edodes]	Lentinula_edodes	100	1.1e-43
TRINITY_DN16129_c0_g1	GAW10572.1	hypothetical protein LENED_012854 [Lentinula edodes]	Lentinula_edodes	100	2.6e-33
TRINITY_DN16149_c0_g1	GAW03851.1	regulation of carbohydrate metabolism-related protein [Lentinula edodes]	Lentinula_edodes	95.7	3.5e-16
TRINITY_DN16175_c0_g1	GAW04698.1	succinyl- synthetase beta chain SSC-beta [Lentinula edodes]	Lentinula_edodes	100	2.4e-33
TRINITY_DN16263_c0_g1	GAW10026.1	hypothetical protein LENED_012249 [Lentinula edodes]	Lentinula_edodes	100	8.3e-50
TRINITY_DN16268_c0_g1	GAW09431.1	peroxisomal biogenesis factor 11 [Lentinula edodes]	Lentinula_edodes	100	2.7e-120
TRINITY_DN16312_c0_g1	GAW10378.1	hypothetical protein LENED_012636 [Lentinula edodes]	Lentinula_edodes	99.1	3.9e-51
TRINITY_DN1632_c0_g1	GAW08254.1	60s ribosomal protein l18 [Lentinula edodes]	Lentinula_edodes	100	4.7e-97
TRINITY_DN16406_c0_g1	GAW06069.1	mitochondrial cytochrome c oxidase subunit VIa [Lentinula edodes]	Lentinula_edodes	97.5	3e-63
TRINITY_DN1640_c0_g1	GAW09160.1	protein kinase [Lentinula edodes]	Lentinula_edodes	92.8	6.5e-33
TRINITY_DN16452_c0_g1	GAW05257.1	fructose-bisphosphate aldolase [Lentinula edodes]	Lentinula_edodes	97	1.2e-205
TRINITY_DN16454_c0_g1	GAW07501.1	hypothetical protein LENED_009499 [Lentinula edodes]	Lentinula_edodes	100	2.2e-40
TRINITY_DN16471_c0_g1	GAW04499.1	hypothetical protein LENED_006295 [Lentinula edodes]	Lentinula_edodes	99.5	2.4e-82
TRINITY_DN16475_c0_g1	GAW01949.1	hypothetical protein LENED_003573 [Lentinula edodes]	Lentinula_edodes	100	1.4e-31
TRINITY_DN16477_c0_g1	GAV98788.1	aminodeoxychorismate lyase [Lentinula edodes]	Lentinula_edodes	100	1.2e-36
TRINITY_DN16510_c0_g1	GAV99554.1	hypothetical protein LENED_001018 [Lentinula edodes]	Lentinula_edodes	74.4	4.1e-26
TRINITY_DN16515_c0_g1	GAW00981.1	60S ribosomal protein L37 [Lentinula edodes]	Lentinula_edodes	100	1.1e-43
TRINITY_DN16529_c0_g1	GAV99486.1	40S ribosomal protein S7 [Lentinula edodes]	Lentinula_edodes	100	1.4e-50
TRINITY_DN16549_c0_g1	GAW06231.1	hypothetical protein LENED_008139 [Lentinula edodes]	Lentinula_edodes	100	1.6e-47
TRINITY_DN16570_c0_g1	GAW09720.1	hypothetical protein LENED_011901 [Lentinula edodes]	Lentinula_edodes	98.4	1.5e-75
TRINITY_DN16583_c0_g1	GAW09460.1	NIF-domain-containing protein [Lentinula edodes]	Lentinula_edodes	100	2.7e-45
TRINITY_DN16660_c0_g1	GAV99491.1	NDUFA12-domain-containing protein [Lentinula edodes]	Lentinula_edodes	100	1.5e-37
TRINITY_DN16673_c0_g1	GAW10629.1	hypothetical protein LENED_012917 [Lentinula edodes]	Lentinula_edodes	100	1.9e-33
TRINITY_DN16674_c0_g1	GAW00371.1	INH1 subunit of the mitochondrial F1F0 ATP synthase [Lentinula edodes]	Lentinula_edodes	100	4.1e-24
TRINITY_DN16682_c0_g1	GAW01983.1	nadh-ubiquinone oxidoreductase 12 kda subunit [Lentinula edodes]	Lentinula_edodes	100	2e-35
TRINITY_DN16687_c0_g1	GAW01862.1	small nuclear ribonucleo protein [Lentinula edodes]	Lentinula_edodes	100	5.8e-36
TRINITY_DN1671_c0_g2	GAW07010.1	Endosulfine-domain-containing protein [Lentinula edodes]	Lentinula_edodes	100	3.8e-49
TRINITY_DN16737_c0_g1	GAW00258.1	alanine aminotransferase [Lentinula edodes]	Lentinula_edodes	100	2.5e-278
TRINITY_DN16837_c0_g1	GAW05281.1	zinc knuckle domain protein [Lentinula edodes]	Lentinula_edodes	95.4	1.7e-90
TRINITY_DN16941_c0_g1	GAV98746.1	60S acidic ribosomal protein P1 [Lentinula edodes]	Lentinula_edodes	100	1.1e-23
TRINITY_DN16944_c0_g1	GAW01406.1	dienelactone hydrolase [Lentinula edodes]	Lentinula_edodes	100	5.3e-46
TRINITY_DN16957_c0_g1	GAW06075.1	cell division control GTP binding protein [Lentinula edodes]	Lentinula_edodes	100	4.2e-55
TRINITY_DN16998_c0_g1	GAV98863.1	protein translocase SEC6 [Lentinula edodes]	Lentinula_edodes	100	1.6e-32
TRINITY_DN17009_c0_g1	GAW03645.1	GNS1 SUR4 membrane protein [Lentinula edodes]	Lentinula_edodes	99	1.1e-145
TRINITY_DN17073_c0_g1	GAW05367.1	1 concanamycin induced protein c [Lentinula edodes]	Lentinula_edodes	100	8.1e-50
TRINITY_DN17076_c0_g1	GAW03630.1	hypothetical protein LENED_005369 [Lentinula edodes]	Lentinula_edodes	98.5	3.1e-29
TRINITY_DN17078_c0_g1	GAW09656.1	hypothetical protein LENED_011830 [Lentinula edodes]	Lentinula_edodes	97.7	3.5e-69
TRINITY_DN1719_c0_g1	GAW02331.1	glycosyltransferase family 4 protein [Lentinula edodes]	Lentinula_edodes	100	0
TRINITY_DN1744_c0_g1	GAW04222.1	40S ribosomal protein S8 [Lentinula edodes]	Lentinula_edodes	100	4e-71
TRINITY_DN1761_c0_g1	BAH80459.1	putative heat shock transcription factor [Lentinula edodes]	Lentinula_edodes	98.8	6.9e-29
TRINITY_DN1782_c0_g1	GAV99804.1	hypothetical protein LENED_001287 [Lentinula edodes]	Lentinula_edodes	83	1.1e-17
TRINITY_DN17_c0_g1	GAW08712.1	hypothetical protein LENED_010790 [Lentinula edodes]	Lentinula_edodes	90.9	1.9e-30
TRINITY_DN1813_c0_g1	GAV98654.1	hypothetical protein LENED_000044 [Lentinula edodes]	Lentinula_edodes	99.3	1.3e-72
TRINITY_DN1865_c0_g1	GAW04154.1	ring u-box domain-containing protein [Lentinula edodes]	Lentinula_edodes	100	1.4e-75
TRINITY_DN1877_c0_g1	GAW00559.1	60S ribosomal protein L33 [Lentinula edodes]	Lentinula_edodes	100	2.5e-52
TRINITY_DN1894_c0_g1	GAW03107.1	amidohydrolase family protein [Lentinula edodes]	Lentinula_edodes	94.5	2e-189
TRINITY_DN1899_c0_g1	GAW04797.1	mitochondrial fission 1 protein [Lentinula edodes]	Lentinula_edodes	100	7.8e-31
TRINITY_DN1902_c0_g1	GAW01637.1	mismatched base pair and cruciform DNA recognition protein [Lentinula edodes]	Lentinula_edodes	98.4	7.6e-26
TRINITY_DN1921_c0_g1	GAW01879.1	like-Sm ribonucleo protein [Lentinula edodes]	Lentinula_edodes	100	2.8e-34
TRINITY_DN1941_c0_g1	GAW00900.1	vacuolar ATP synthase proteolipid subunit [Lentinula edodes]	Lentinula_edodes	100	3.7e-72
TRINITY_DN1943_c0_g1	GAW10489.1	rab-type small GTP-binding protein [Lentinula edodes]	Lentinula_edodes	100	6e-116
TRINITY_DN1949_c0_g1	GAW03085.1	acid protease [Lentinula edodes]	Lentinula_edodes	97.1	5.3e-83
TRINITY_DN1953_c0_g1	GAW07808.1	mfs git1p-related glycerophosphoinositol and glycerophosphocholine permease [Lentinula edodes]	Lentinula_edodes	100	2.7e-54
TRINITY_DN1955_c0_g1	GAW09212.1	HSP20-like chaperone [Lentinula edodes]	Lentinula_edodes	100	2.4e-65
TRINITY_DN1961_c0_g1	GAW01915.1	C4-methyl sterol oxidase [Lentinula edodes]	Lentinula_edodes	89.6	4.2e-167
TRINITY_DN1970_c0_g1	GAV99159.1	E set domain-containing protein [Lentinula edodes]	Lentinula_edodes	100	1.4e-62
TRINITY_DN197_c0_g1	GAW06941.1	aminoglycoside phosphotransferase [Lentinula edodes]	Lentinula_edodes	98.8	2.8e-38
TRINITY_DN1990_c0_g1	GAW04707.1	40s ribosomal protein s27 [Lentinula edodes]	Lentinula_edodes	100	7.5e-42
TRINITY_DN2003_c0_g1	GAV99221.1	er-derived vesicles protein erv14 [Lentinula edodes]	Lentinula_edodes	100	6.1e-52
TRINITY_DN2010_c0_g1	GAW05231.1	acyl- - peroxisomal [Lentinula edodes]	Lentinula_edodes	100	6.5e-33
TRINITY_DN2021_c0_g1	GAW08214.1	ectomycorrhiza-regulated protein [Lentinula edodes]	Lentinula_edodes	100	2.9e-24
TRINITY_DN2027_c0_g1	GAW09293.1	DUF1909-domain-containing protein [Lentinula edodes]	Lentinula_edodes	100	5e-34
TRINITY_DN2052_c0_g1	GAW10455.1	2-cysteine peroxiredoxin [Lentinula edodes]	Lentinula_edodes	100	2.4e-36
TRINITY_DN2074_c0_g1	GAW01793.1	atp synthase subunit 5 [Lentinula edodes]	Lentinula_edodes	99.5	2e-104
TRINITY_DN2107_c0_g1	GAW07907.1	small secreted protein [Lentinula edodes]	Lentinula_edodes	100	1e-88
TRINITY_DN2183_c0_g1	GAW04218.1	inorganic phosphate transporter [Lentinula edodes]	Lentinula_edodes	99.2	2.7e-64
TRINITY_DN2188_c0_g1	GAW06822.1	likely protein kinase [Lentinula edodes]	Lentinula_edodes	82.1	4.6e-07
TRINITY_DN2189_c0_g1	GAW02133.1	hypothetical protein LENED_003767 [Lentinula edodes]	Lentinula_edodes	99.1	2.3e-91
TRINITY_DN2251_c0_g1	GAW07121.1	rna-binding protein [Lentinula edodes]	Lentinula_edodes	100	1.3e-30
TRINITY_DN2258_c0_g1	GAW03029.1	hypothetical protein LENED_004717 [Lentinula edodes]	Lentinula_edodes	100	7.4e-104
TRINITY_DN2268_c0_g1	GAW07708.1	eukaryotic translation initiation factor 5 [Lentinula edodes]	Lentinula_edodes	98.2	1.3e-114
TRINITY_DN2285_c0_g1	GAV98733.1	proteophosphoglycan 5 [Lentinula edodes]	Lentinula_edodes	100	1.4e-97
TRINITY_DN2375_c0_g1	GAW09705.1	cytochrome c oxidase subunit VIIc [Lentinula edodes]	Lentinula_edodes	95.5	2.9e-32
TRINITY_DN2378_c0_g2	GAW09324.1	prohibitin PHB1 [Lentinula edodes]	Lentinula_edodes	100	1e-18
TRINITY_DN243_c0_g1	GAW09170.1	hypothetical protein LENED_011304 [Lentinula edodes]	Lentinula_edodes	100	2.1e-36
TRINITY_DN2454_c0_g1	GAW06798.1	26S proteasome subunit P45 [Lentinula edodes]	Lentinula_edodes	100	9.8e-79
TRINITY_DN2459_c0_g1	GAW10121.1	polyadenylate binding protein [Lentinula edodes]	Lentinula_edodes	100	7.1e-27
TRINITY_DN2495_c0_g1	GAW05981.1	hypothetical protein LENED_007872 [Lentinula edodes]	Lentinula_edodes	100	1.1e-30
TRINITY_DN2537_c0_g1	GAW05951.1	hypothetical protein LENED_007841 [Lentinula edodes]	Lentinula_edodes	100	1.1e-26
TRINITY_DN2540_c0_g1	GAW01227.1	heat shock protein 9 [Lentinula edodes]	Lentinula_edodes	98.9	1.2e-13
TRINITY_DN2555_c0_g1	GAW01359.1	hypothetical protein LENED_002949 [Lentinula edodes]	Lentinula_edodes	100	4.3e-39
TRINITY_DN2568_c0_g1	GAW09236.1	alpha beta-hydrolase [Lentinula edodes]	Lentinula_edodes	100	3.7e-33
TRINITY_DN2577_c0_g1	GAW02963.1	iron reductase [Lentinula edodes]	Lentinula_edodes	100	5.6e-45
TRINITY_DN2611_c0_g1	GAW05620.1	hypothetical protein LENED_007487 [Lentinula edodes]	Lentinula_edodes	90.1	7.8e-122
TRINITY_DN2617_c0_g1	GAW05482.1	hypothetical protein LENED_007342 [Lentinula edodes]	Lentinula_edodes	99.5	2.9e-98
TRINITY_DN2652_c0_g1	GAW10589.1	fungal hydrophobin [Lentinula edodes]	Lentinula_edodes	85.6	6e-45
TRINITY_DN2661_c0_g1	GAW10042.1	lanosterol 14-alpha-demethylase [Lentinula edodes]	Lentinula_edodes	100	4.4e-63
TRINITY_DN2663_c0_g1	GAW07905.1	C4-methyl sterol oxidase [Lentinula edodes]	Lentinula_edodes	99.4	6.3e-193
TRINITY_DN2691_c0_g1	GAW00862.1	UPF0005-domain-containing protein [Lentinula edodes]	Lentinula_edodes	100	2.8e-54
TRINITY_DN2691_c0_g2	GAW00862.1	UPF0005-domain-containing protein [Lentinula edodes]	Lentinula_edodes	100	1.3e-74
TRINITY_DN2705_c0_g1	GAW09781.1	cytochrome c oxidase subunit VIb [Lentinula edodes]	Lentinula_edodes	98.9	5.3e-48
TRINITY_DN2727_c0_g1	GAW04812.1	hypothetical protein LENED_006626 [Lentinula edodes]	Lentinula_edodes	98.5	4.5e-103
TRINITY_DN2761_c0_g1	GAW06250.1	RNA-binding domain-containing protein [Lentinula edodes]	Lentinula_edodes	100	1.7e-43
TRINITY_DN2805_c0_g1	GAW08521.1	mitochondrial atpase subunit [Lentinula edodes]	Lentinula_edodes	90.5	9e-95
TRINITY_DN2821_c0_g1	GAW04445.1	hypothetical protein LENED_006234 [Lentinula edodes]	Lentinula_edodes	99.4	5.1e-84
TRINITY_DN2857_c0_g1	GAW05008.1	proteasome maturation factor UMP1 [Lentinula edodes]	Lentinula_edodes	100	2.8e-44
TRINITY_DN2912_c0_g1	GAV99478.1	hypothetical protein LENED_000937 [Lentinula edodes]	Lentinula_edodes	100	2.3e-55
TRINITY_DN292_c0_g1	GAW07176.1	hypothetical protein LENED_009151 [Lentinula edodes]	Lentinula_edodes	100	1.7e-41
TRINITY_DN2936_c0_g1	GAW10541.1	NADH-ubiquinone oxidoreductase [Lentinula edodes]	Lentinula_edodes	100	3.7e-43
TRINITY_DN2939_c0_g1	BAD02339.1	delta 9-fatty acid desaturase [Lentinula edodes]	Lentinula_edodes	100	1.4e-286
TRINITY_DN2951_c0_g1	GAW02475.1	protein bli-3 [Lentinula edodes]	Lentinula_edodes	99.5	2.6e-109
TRINITY_DN2966_c0_g1	GAW06095.1	60S ribosomal protein L13 [Lentinula edodes]	Lentinula_edodes	100	2.3e-102
TRINITY_DN2967_c0_g1	GAW07569.1	hypothetical protein LENED_009572 [Lentinula edodes]	Lentinula_edodes	80	8.4e-26
TRINITY_DN2989_c0_g1	GAW01606.1	ubiquitin-conjugating enzyme [Lentinula edodes]	Lentinula_edodes	100	2.2e-62
TRINITY_DN3008_c0_g1	GAW00001.1	hypothetical protein LENED_001490 [Lentinula edodes]	Lentinula_edodes	90.7	2.2e-42
TRINITY_DN3040_c0_g1	GAV99485.1	Ras-like GTP-binding protein RYL2 [Lentinula edodes]	Lentinula_edodes	100	2.1e-18
TRINITY_DN3099_c0_g2	GAV99514.1	flavin-containing monooxygenase [Lentinula edodes]	Lentinula_edodes	100	2.3e-78
TRINITY_DN30_c0_g1	GAW00824.1	ynr018w-like protein [Lentinula edodes]	Lentinula_edodes	98.6	1.6e-116
TRINITY_DN315_c0_g1	GAV98920.1	60S ribosomal protein L9 [Lentinula edodes]	Lentinula_edodes	100	2.8e-72
TRINITY_DN3172_c0_g1	GAW08583.1	hypothetical protein LENED_010650 [Lentinula edodes]	Lentinula_edodes	96.8	1.9e-25
TRINITY_DN3186_c0_g1	GAW05666.1	ribosomal protein L38e [Lentinula edodes]	Lentinula_edodes	100	1e-35
TRINITY_DN3217_c0_g1	GAW06457.1	40S ribosomal protein S20 [Lentinula edodes]	Lentinula_edodes	100	1.4e-51
TRINITY_DN3310_c0_g1	GAW00745.1	hypothetical protein LENED_002294 [Lentinula edodes]	Lentinula_edodes	100	2.1e-82
TRINITY_DN3322_c0_g1	BAH80467.1	putative protein disulfide isomerase [Lentinula edodes]	Lentinula_edodes	98.4	1.1e-68
TRINITY_DN3378_c0_g1	GAW03622.1	hypothetical protein LENED_005361 [Lentinula edodes]	Lentinula_edodes	88.2	4.5e-09
TRINITY_DN3378_c0_g2	GAW03622.1	hypothetical protein LENED_005361 [Lentinula edodes]	Lentinula_edodes	100	1.3e-49
TRINITY_DN3401_c0_g1	GAW03072.1	hypothetical protein LENED_004763 [Lentinula edodes]	Lentinula_edodes	100	3.8e-77
TRINITY_DN3454_c0_g1	GAW03652.1	hypothetical protein LENED_005392 [Lentinula edodes]	Lentinula_edodes	79.6	6.8e-33
TRINITY_DN3454_c0_g2	GAW03652.1	hypothetical protein LENED_005392 [Lentinula edodes]	Lentinula_edodes	100	4.4e-32
TRINITY_DN3505_c0_g1	GAW05749.1	hypothetical protein LENED_007626 [Lentinula edodes]	Lentinula_edodes	100	7.2e-35
TRINITY_DN3507_c0_g1	GAW06236.1	hypothetical protein LENED_008145 [Lentinula edodes]	Lentinula_edodes	100	3.8e-12
TRINITY_DN3550_c0_g1	GAV98802.1	udp-n-acetylglucosamine diphosphorylase [Lentinula edodes]	Lentinula_edodes	100	3.6e-60
TRINITY_DN3552_c0_g1	GAW04357.1	hypothetical protein LENED_006138 [Lentinula edodes]	Lentinula_edodes	100	6.5e-40
TRINITY_DN3567_c0_g1	GAW01155.1	Clavaminate synthase-like protein [Lentinula edodes]	Lentinula_edodes	100	3.7e-98
TRINITY_DN3567_c0_g2	GAW01155.1	Clavaminate synthase-like protein [Lentinula edodes]	Lentinula_edodes	98.4	1.5e-64
TRINITY_DN3623_c0_g1	GAW10410.1	mitochondrial import translocase subunit Tom22 [Lentinula edodes]	Lentinula_edodes	100	4.2e-32
TRINITY_DN362_c0_g1	GAW08465.1	SHQ1-domain-containing protein [Lentinula edodes]	Lentinula_edodes	98.2	1.2e-26
TRINITY_DN3644_c0_g1	GAV99843.1	major facilitator superfamily protein [Lentinula edodes]	Lentinula_edodes	100	9.4e-32
TRINITY_DN3647_c0_g1	GAW07537.1	family A1 protease [Lentinula edodes]	Lentinula_edodes	100	1.2e-39
TRINITY_DN3676_c0_g1	GAW00915.1	cytochrome P450 monooxygenase [Lentinula edodes]	Lentinula_edodes	100	6.6e-30
TRINITY_DN3683_c0_g1	GAW03991.1	s-adenosyl-l-homocysteine hydrolase [Lentinula edodes]	Lentinula_edodes	100	8.4e-33
TRINITY_DN3740_c0_g1	GAW03430.1	transposon factor [Lentinula edodes]	Lentinula_edodes	74.3	7e-27
TRINITY_DN3751_c0_g1	GAW00069.1	hypothetical protein LENED_001561 [Lentinula edodes]	Lentinula_edodes	100	2.9e-33
TRINITY_DN3883_c0_g1	GAW06589.1	GTP-binding protein RAB5 [Lentinula edodes]	Lentinula_edodes	100	1.4e-46
TRINITY_DN3893_c0_g1	BAH80468.1	hypothetical protein [Lentinula edodes]	Lentinula_edodes	100	3.2e-96
TRINITY_DN3901_c0_g1	GAW01394.1	glycosyltransferase family 35 protein [Lentinula edodes]	Lentinula_edodes	100	1.2e-72
TRINITY_DN3918_c0_g1	GAW04213.1	40S ribosomal protein S5 [Lentinula edodes]	Lentinula_edodes	100	4.5e-25
TRINITY_DN3918_c0_g2	GAW04213.1	40S ribosomal protein S5 [Lentinula edodes]	Lentinula_edodes	100	1.6e-48
TRINITY_DN3920_c0_g1	GAW00821.1	hypothetical protein LENED_002372 [Lentinula edodes]	Lentinula_edodes	99.1	2.9e-57
TRINITY_DN3958_c0_g1	GAW03662.1	glycoside hydrolase family 16 protein [Lentinula edodes]	Lentinula_edodes	100	2.1e-39
TRINITY_DN397_c0_g1	GAW00155.1	hypothetical protein LENED_001655 [Lentinula edodes]	Lentinula_edodes	88.4	1.1e-70
TRINITY_DN4025_c0_g1	GAW05326.1	ribosomal protein l35 [Lentinula edodes]	Lentinula_edodes	99.2	1.4e-54
TRINITY_DN4036_c0_g1	GAW03613.1	ubiquinone oxidoreductase 20 kd subunit [Lentinula edodes]	Lentinula_edodes	100	9.4e-29
TRINITY_DN4037_c0_g1	GAW00153.1	hypothetical protein LENED_001653 [Lentinula edodes]	Lentinula_edodes	96.6	5.3e-77
TRINITY_DN4098_c0_g3	GAW01277.1	gegh 16 protein [Lentinula edodes]	Lentinula_edodes	99.7	2e-103
TRINITY_DN4109_c0_g1	GAV98821.1	thioredoxin-domain-containing protein [Lentinula edodes]	Lentinula_edodes	100	1.2e-44
TRINITY_DN410_c0_g1	GAW04202.1	60s ribosomal protein l20 [Lentinula edodes]	Lentinula_edodes	100	1.8e-89
TRINITY_DN4132_c0_g1	GAW07186.1	valosin-containing protein [Lentinula edodes]	Lentinula_edodes	100	6.6e-79
TRINITY_DN4148_c0_g1	GAW04753.1	DUF300-domain-containing protein [Lentinula edodes]	Lentinula_edodes	100	4.5e-34
TRINITY_DN4195_c0_g1	GAW08673.1	hypothetical protein LENED_010750 [Lentinula edodes]	Lentinula_edodes	98.2	1e-24
TRINITY_DN4198_c0_g1	GAW04006.1	UPF0057-domain-containing protein [Lentinula edodes]	Lentinula_edodes	100	8.5e-29
TRINITY_DN4224_c0_g1	GAW01545.1	NADH-ubiquinone oxidoreductase kDa subunit [Lentinula edodes]	Lentinula_edodes	100	9.3e-58
TRINITY_DN424_c0_g1	AAG00900.1	hydrophobin 1 [Lentinula edodes]	Lentinula_edodes	100	1.1e-47
TRINITY_DN4271_c0_g1	GAW05491.1	cyclohexanone monooxygenase [Lentinula edodes]	Lentinula_edodes	100	3.2e-35
TRINITY_DN4271_c0_g2	GAW05491.1	cyclohexanone monooxygenase [Lentinula edodes]	Lentinula_edodes	98.7	1.5e-38
TRINITY_DN430_c0_g1	GAW09590.1	60S ribosomal protein L21 [Lentinula edodes]	Lentinula_edodes	100	3.9e-74
TRINITY_DN434_c0_g1	GAV99344.1	hypothetical protein LENED_000795 [Lentinula edodes]	Lentinula_edodes	77	5.8e-83
TRINITY_DN4375_c0_g1	GAV99079.1	hypothetical protein LENED_000510 [Lentinula edodes]	Lentinula_edodes	98.1	6.4e-47
TRINITY_DN4398_c0_g1	GAW03326.1	duf543 domain-containing protein [Lentinula edodes]	Lentinula_edodes	100	1.3e-48
TRINITY_DN4416_c0_g1	GAW05802.1	splicing factor sf1 [Lentinula edodes]	Lentinula_edodes	100	4.3e-23
TRINITY_DN4416_c0_g2	GAW05802.1	splicing factor sf1 [Lentinula edodes]	Lentinula_edodes	100	1.9e-59
TRINITY_DN441_c0_g1	GAW00985.1	synaptobrevin-like protein [Lentinula edodes]	Lentinula_edodes	100	9.2e-53
TRINITY_DN4444_c0_g1	GAV99638.1	carboxylesterase [Lentinula edodes]	Lentinula_edodes	100	1.2e-13
TRINITY_DN4449_c0_g1	GAW07140.1	MBR-related protein [Lentinula edodes]	Lentinula_edodes	99	1.6e-51
TRINITY_DN4476_c0_g1	GAW07564.1	Zn -Cys binuclear cluster domain-containing protein [Lentinula edodes]	Lentinula_edodes	98	1.3e-49
TRINITY_DN4491_c0_g1	GAW09317.1	6-phosphogluconate dehydrogenase [Lentinula edodes]	Lentinula_edodes	100	9.1e-45
TRINITY_DN4494_c0_g1	GAW06001.1	5-methyltetrahydropteroyltriglutamate-homocysteine s-methyltransferase [Lentinula edodes]	Lentinula_edodes	100	4.5e-41
TRINITY_DN4500_c0_g1	GAW08674.1	hypothetical protein LENED_010751 [Lentinula edodes]	Lentinula_edodes	100	1e-53
TRINITY_DN4500_c0_g2	GAW08674.1	hypothetical protein LENED_010751 [Lentinula edodes]	Lentinula_edodes	82.8	2.6e-18
TRINITY_DN4518_c0_g1	GAW06254.1	hypothetical protein LENED_008165 [Lentinula edodes]	Lentinula_edodes	98.5	4.1e-29
TRINITY_DN452_c0_g1	BAH80446.1	putative glycoside hydrolase family 16 protein [Lentinula edodes]	Lentinula_edodes	99.7	1.4e-190
TRINITY_DN4532_c0_g1	GAW04113.1	Transcription initiation factor IIE subunit beta [Lentinula edodes]	Lentinula_edodes	100	1.6e-34
TRINITY_DN4549_c0_g1	GAW02938.1	hsp10-like protein [Lentinula edodes]	Lentinula_edodes	99.1	1.5e-52
TRINITY_DN4562_c0_g1	GAW07537.1	family A1 protease [Lentinula edodes]	Lentinula_edodes	100	3.4e-36
TRINITY_DN4570_c0_g1	GAW09531.1	hypothetical protein LENED_011692 [Lentinula edodes]	Lentinula_edodes	98.8	6.9e-29
TRINITY_DN4584_c0_g1	GAW03602.1	40s ribosomal protein s11 [Lentinula edodes]	Lentinula_edodes	100	4.6e-34
TRINITY_DN4585_c0_g1	GAW01485.1	iron permease FTR1 [Lentinula edodes]	Lentinula_edodes	100	1.7e-43
TRINITY_DN4585_c0_g2	GAW01485.1	iron permease FTR1 [Lentinula edodes]	Lentinula_edodes	100	3.1e-63
TRINITY_DN4585_c0_g3	GAW01485.1	iron permease FTR1 [Lentinula edodes]	Lentinula_edodes	100	1.5e-52
TRINITY_DN4606_c0_g1	GAW02864.1	DER1-domain-containing protein [Lentinula edodes]	Lentinula_edodes	100	2.5e-56
TRINITY_DN4617_c0_g1	GAW01383.1	snRNP subunit [Lentinula edodes]	Lentinula_edodes	100	1.5e-39
TRINITY_DN470_c0_g1	GAW09651.1	methionine adenosyltransferase [Lentinula edodes]	Lentinula_edodes	100	6.4e-230
TRINITY_DN4740_c0_g1	GAW00890.1	Transcriptional regulator partial [Lentinula edodes]	Lentinula_edodes	100	3e-26
TRINITY_DN4769_c0_g1	GAW07658.1	NAD-aldehyde dehydrogenase [Lentinula edodes]	Lentinula_edodes	100	7.3e-35
TRINITY_DN482_c0_g1	GAW00186.1	cytochrome b5 [Lentinula edodes]	Lentinula_edodes	99.3	4.8e-76
TRINITY_DN4893_c0_g1	GAW04422.1	Mg-dependent DNase [Lentinula edodes]	Lentinula_edodes	100	2.1e-30
TRINITY_DN4893_c0_g2	GAW04422.1	Mg-dependent DNase [Lentinula edodes]	Lentinula_edodes	100	6e-54
TRINITY_DN4938_c0_g1	GAW03859.1	glycoside hydrolase family 61 protein [Lentinula edodes]	Lentinula_edodes	96.7	4.6e-25
TRINITY_DN4941_c0_g1	GAW05553.1	guanine nucleotide-binding protein alpha-4 subunit [Lentinula edodes]	Lentinula_edodes	83.8	3.4e-40
TRINITY_DN4943_c0_g1	GAW02472.1	short-chain dehydrogenase reductase sdr [Lentinula edodes]	Lentinula_edodes	100	3.8e-50
TRINITY_DN4982_c0_g1	BAH80465.1	putative GATA type transcriptional activator [Lentinula edodes]	Lentinula_edodes	89.7	5.3e-14
TRINITY_DN4982_c0_g2	BAH80465.1	putative GATA type transcriptional activator [Lentinula edodes]	Lentinula_edodes	100	3.2e-36
TRINITY_DN5038_c0_g1	GAW01474.1	imp dehydrogenase [Lentinula edodes]	Lentinula_edodes	98.9	1e-41
TRINITY_DN5069_c0_g1	GAW01723.1	eukaryotic translation initiation factor 5A-2 [Lentinula edodes]	Lentinula_edodes	92.4	1.8e-90
TRINITY_DN5080_c0_g1	GAW00077.1	zinc knuckle domain protein [Lentinula edodes]	Lentinula_edodes	100	5.3e-08
TRINITY_DN5101_c0_g3	GAW08657.1	alpha beta-hydrolase [Lentinula edodes]	Lentinula_edodes	100	2.3e-75
TRINITY_DN510_c0_g1	GAW04267.1	prenylated rab acceptor PRA1 [Lentinula edodes]	Lentinula_edodes	100	2.7e-77
TRINITY_DN5203_c0_g1	GAW05277.1	Delta-1-pyrroline-5-carboxylate dehydrogenase [Lentinula edodes]	Lentinula_edodes	100	5.4e-35
TRINITY_DN5210_c0_g1	GAW02167.1	60s ribosomal protein l2 [Lentinula edodes]	Lentinula_edodes	96.9	9.6e-126
TRINITY_DN5213_c0_g1	GAW04884.1	UPF0220-domain-containing protein [Lentinula edodes]	Lentinula_edodes	100	1.5e-27
TRINITY_DN5213_c0_g2	GAW04884.1	UPF0220-domain-containing protein [Lentinula edodes]	Lentinula_edodes	99	6.3e-53
TRINITY_DN5215_c0_g1	GAW09646.1	thioredoxin-like protein [Lentinula edodes]	Lentinula_edodes	100	9.2e-35
TRINITY_DN52_c0_g1	GAW07143.1	transcription initiation factor IIA gamma subunit [Lentinula edodes]	Lentinula_edodes	100	3.2e-39
TRINITY_DN5309_c0_g1	GAW01757.1	hypothetical protein LENED_003368 [Lentinula edodes]	Lentinula_edodes	57.5	1.8e-21
TRINITY_DN5312_c0_g1	GAV98961.1	phenylalanine-trna ligase [Lentinula edodes]	Lentinula_edodes	61.2	5.4e-28
TRINITY_DN5316_c0_g1	GAW02026.1	40S ribosomal protein S4 [Lentinula edodes]	Lentinula_edodes	100	1.1e-32
TRINITY_DN5343_c0_g1	GAW07209.1	glycoside hydrolase family 16 protein [Lentinula edodes]	Lentinula_edodes	100	2e-35
TRINITY_DN5363_c0_g1	GAW02173.1	RING U-box [Lentinula edodes]	Lentinula_edodes	92.6	1.4e-19
TRINITY_DN5369_c0_g1	GAV99118.1	ph domain-containing protein [Lentinula edodes]	Lentinula_edodes	100	5.7e-67
TRINITY_DN5471_c0_g1	GAV99969.1	general transcriptional repressor [Lentinula edodes]	Lentinula_edodes	100	4e-21
TRINITY_DN5550_c0_g1	GAW03104.1	N-acetyltransferase complex catalytic subunit Ard1 [Lentinula edodes]	Lentinula_edodes	91.3	3.1e-27
TRINITY_DN5551_c0_g1	GAW07795.1	Poly + RNA export protein [Lentinula edodes]	Lentinula_edodes	100	2.9e-43
TRINITY_DN5592_c0_g1	GAW03004.1	hypothetical protein LENED_004692 [Lentinula edodes]	Lentinula_edodes	100	5.2e-29
TRINITY_DN5690_c0_g1	GAW00333.1	hypothetical protein LENED_001845 [Lentinula edodes]	Lentinula_edodes	100	7.1e-40
TRINITY_DN5707_c0_g1	GAW09644.1	G-protein gamma subunit [Lentinula edodes]	Lentinula_edodes	98.8	2.7e-39
TRINITY_DN5729_c0_g1	GAW01961.1	phosphoglycerate kinase [Lentinula edodes]	Lentinula_edodes	99.8	1.1e-231
TRINITY_DN576_c0_g1	GAW00983.1	60S ribosomal protein L24 [Lentinula edodes]	Lentinula_edodes	100	1.2e-52
TRINITY_DN5783_c0_g1	GAW03309.1	hypothetical protein LENED_005027 [Lentinula edodes]	Lentinula_edodes	100	1.6e-23
TRINITY_DN5783_c0_g2	GAW03309.1	hypothetical protein LENED_005027 [Lentinula edodes]	Lentinula_edodes	100	1.8e-25
TRINITY_DN5856_c0_g1	GAW03667.1	40s ribosomal protein s24 [Lentinula edodes]	Lentinula_edodes	100	6.6e-44
TRINITY_DN5877_c0_g1	GAW08530.1	hypothetical protein LENED_010591 [Lentinula edodes]	Lentinula_edodes	100	1.8e-39
TRINITY_DN5877_c0_g2	GAW08530.1	hypothetical protein LENED_010591 [Lentinula edodes]	Lentinula_edodes	100	5.6e-29
TRINITY_DN5890_c0_g1	GAW10247.1	succinate:fumarate antiporter [Lentinula edodes]	Lentinula_edodes	100	6.9e-46
TRINITY_DN5924_c0_g1	GAW05927.1	hypothetical protein LENED_007815 [Lentinula edodes]	Lentinula_edodes	93.3	3.2e-61
TRINITY_DN5948_c0_g1	GAW08238.1	stress-induced-phosphoprotein 1 [Lentinula edodes]	Lentinula_edodes	100	7.6e-51
TRINITY_DN6060_c0_g1	GAW00851.1	hypothetical protein LENED_002405 [Lentinula edodes]	Lentinula_edodes	100	2.4e-33
TRINITY_DN6064_c0_g1	GAW06595.1	hypothetical protein LENED_008532 [Lentinula edodes]	Lentinula_edodes	100	5.2e-36
TRINITY_DN6096_c0_g1	GAW06075.1	cell division control GTP binding protein [Lentinula edodes]	Lentinula_edodes	100	2.1e-44
TRINITY_DN6121_c0_g1	GAW00547.1	retrieval of early ER protein Rer1 [Lentinula edodes]	Lentinula_edodes	100	1e-59
TRINITY_DN6158_c0_g1	GAW01744.1	heat shock protein 70 [Lentinula edodes]	Lentinula_edodes	100	5e-30
TRINITY_DN6190_c0_g1	GAW10002.1	pyruvate carboxylase [Lentinula edodes]	Lentinula_edodes	100	4.5e-32
TRINITY_DN6250_c0_g1	GAW10110.1	DEAD-domain-containing protein [Lentinula edodes]	Lentinula_edodes	100	1.9e-35
TRINITY_DN6285_c0_g1	GAW01342.1	ribosomal protein L27 [Lentinula edodes]	Lentinula_edodes	100	2.3e-36
TRINITY_DN6324_c0_g1	BAH80467.1	putative protein disulfide isomerase [Lentinula edodes]	Lentinula_edodes	100	4e-65
TRINITY_DN6357_c0_g1	Q01200.1	RecName: Full=Protein priA; Flags: Precursor	Lentinula_edodes	93.8	8.8e-95
TRINITY_DN6359_c0_g1	BAT21317.1	lentiavidin2 [Lentinula edodes]	Lentinula_edodes	100	1.6e-81
TRINITY_DN6359_c0_g2	GAW00750.1	avidin family protein [Lentinula edodes]	Lentinula_edodes	100	3.3e-64
TRINITY_DN6361_c0_g1	GAW01552.1	NADH-ubiquinone oxidoreductase 20 kDa subunit [Lentinula edodes]	Lentinula_edodes	100	4.6e-41
TRINITY_DN6413_c0_g1	GAW03268.1	hypothetical protein LENED_004977 [Lentinula edodes]	Lentinula_edodes	99	2.4e-52
TRINITY_DN6413_c1_g1	GAW03268.1	hypothetical protein LENED_004977 [Lentinula edodes]	Lentinula_edodes	71.8	3.7e-21
TRINITY_DN6439_c0_g1	GAW10315.1	vacuolar protein sorting 55 [Lentinula edodes]	Lentinula_edodes	100	3.5e-42
TRINITY_DN6540_c0_g1	GAW08506.1	hypothetical protein LENED_010566 [Lentinula edodes]	Lentinula_edodes	100	4.2e-44
TRINITY_DN6624_c0_g1	GAV99444.1	duf962 domain-containing protein [Lentinula edodes]	Lentinula_edodes	99.5	2.1e-104
TRINITY_DN663_c0_g1	GAV99800.1	actin depolymerizing factor [Lentinula edodes]	Lentinula_edodes	100	5.6e-49
TRINITY_DN6646_c0_g1	GAW03693.1	40s ribosomal protein s3 [Lentinula edodes]	Lentinula_edodes	100	3.7e-44
TRINITY_DN6649_c0_g1	GAW02903.1	duf221 family protein [Lentinula edodes]	Lentinula_edodes	99.1	8.1e-51
TRINITY_DN664_c0_g1	GAW08502.1	kinase-like protein [Lentinula edodes]	Lentinula_edodes	100	2.8e-90
TRINITY_DN6705_c0_g1	GAW01515.1	mannitol-1-phosphate 5-dehydrogenase [Lentinula edodes]	Lentinula_edodes	100	6.7e-43
TRINITY_DN6729_c0_g1	GAW09650.1	phosphatases II [Lentinula edodes]	Lentinula_edodes	100	8e-42
TRINITY_DN6805_c0_g1	GAV99236.1	gliotoxin biosynthesis protein [Lentinula edodes]	Lentinula_edodes	100	5.5e-58
TRINITY_DN6805_c0_g2	GAV99236.1	gliotoxin biosynthesis protein [Lentinula edodes]	Lentinula_edodes	98.7	1.4e-39
TRINITY_DN6852_c1_g1	GAW07276.1	chitin synthase export chaperone [Lentinula edodes]	Lentinula_edodes	100	5.2e-33
TRINITY_DN6864_c0_g1	GAW09492.1	monothiol glutaredoxin-5 [Lentinula edodes]	Lentinula_edodes	99.2	1.3e-60
TRINITY_DN6887_c0_g1	GAW03064.1	snare protein YKT6 [Lentinula edodes]	Lentinula_edodes	100	3.4e-68
TRINITY_DN6894_c0_g1	GAW08613.1	nadh dehydrogenase 1 alpha subcomplex subunit 13 [Lentinula edodes]	Lentinula_edodes	100	2.6e-45
TRINITY_DN6927_c0_g1	GAW06283.1	EF- partial [Lentinula edodes]	Lentinula_edodes	100	2.8e-53
TRINITY_DN7020_c0_g1	GAW05298.1	coiled-coil domain-containing protein 58 [Lentinula edodes]	Lentinula_edodes	100	6.5e-43
TRINITY_DN7046_c0_g1	GAW02187.1	calcium calmodulin-dependent protein phosphatase [Lentinula edodes]	Lentinula_edodes	100	2.2e-30
TRINITY_DN7048_c0_g1	GAV99238.1	protein [Lentinula edodes]	Lentinula_edodes	100	3.8e-181
TRINITY_DN705_c0_g1	GAW03648.1	ace1 transcription factor [Lentinula edodes]	Lentinula_edodes	99.5	0
TRINITY_DN7060_c0_g1	GAV99595.1	heme peroxidase [Lentinula edodes]	Lentinula_edodes	100	2.6e-38
TRINITY_DN7070_c0_g2	GAV98988.1	alpha beta hydrolase fold protein [Lentinula edodes]	Lentinula_edodes	99.3	3.1e-42
TRINITY_DN7070_c0_g3	GAV98988.1	alpha beta hydrolase fold protein [Lentinula edodes]	Lentinula_edodes	100	1.3e-51
TRINITY_DN7082_c0_g1	GAW08433.1	nad binding dehydrogenase [Lentinula edodes]	Lentinula_edodes	100	2.2e-43
TRINITY_DN708_c0_g1	GAW06016.1	lccl domain containing protein [Lentinula edodes]	Lentinula_edodes	100	1.2e-54
TRINITY_DN710_c0_g1	GAW06925.1	calmodulin [Lentinula edodes]	Lentinula_edodes	97	1.1e-44
TRINITY_DN7110_c0_g1	GAW04417.1	receptor expression-enhancing protein 4 [Lentinula edodes]	Lentinula_edodes	100	2.9e-62
TRINITY_DN7147_c0_g1	GAW00854.1	fk506 binding protein 2 [Lentinula edodes]	Lentinula_edodes	98.1	7.7e-54
TRINITY_DN7151_c0_g1	GAW09231.1	vacuolar atp synthase 16 kda proteolipid subunit [Lentinula edodes]	Lentinula_edodes	100	1.3e-57
TRINITY_DN7157_c0_g1	GAW06062.1	general substrate transporter [Lentinula edodes]	Lentinula_edodes	100	1.8e-31
TRINITY_DN7157_c0_g2	GAW06062.1	general substrate transporter [Lentinula edodes]	Lentinula_edodes	100	3.3e-33
TRINITY_DN719_c0_g1	GAW03650.1	heat shock protein hsp98 [Lentinula edodes]	Lentinula_edodes	99.3	8.1e-73
TRINITY_DN7213_c0_g1	GAW06145.1	serine palmitoyltransferase 2 [Lentinula edodes]	Lentinula_edodes	100	8.7e-29
TRINITY_DN7230_c0_g1	GAW01755.1	DUF1748-domain-containing protein [Lentinula edodes]	Lentinula_edodes	98.6	4.9e-30
TRINITY_DN7251_c0_g1	GAW04983.1	small ubiquitin-related modifier [Lentinula edodes]	Lentinula_edodes	98.7	1.7e-34
TRINITY_DN7274_c0_g1	GAW06673.1	calcineurin-binding protein [Lentinula edodes]	Lentinula_edodes	100	5.4e-39
TRINITY_DN7303_c0_g1	GAV99116.1	hypothetical protein LENED_000550 [Lentinula edodes]	Lentinula_edodes	98.5	1.4e-30
TRINITY_DN7308_c0_g1	GAW06675.1	hypothetical protein LENED_008614 [Lentinula edodes]	Lentinula_edodes	100	9.3e-41
TRINITY_DN7309_c0_g1	GAW02184.1	hypothetical protein LENED_003821 [Lentinula edodes]	Lentinula_edodes	97	1.9e-38
TRINITY_DN7339_c0_g1	GAV98645.1	hypothetical protein LENED_000035 [Lentinula edodes]	Lentinula_edodes	100	1.4e-36
TRINITY_DN7391_c0_g1	GAV99485.1	Ras-like GTP-binding protein RYL2 [Lentinula edodes]	Lentinula_edodes	100	7.1e-29
TRINITY_DN7397_c0_g1	GAW03228.1	glycolipid transfer protein [Lentinula edodes]	Lentinula_edodes	100	3e-110
TRINITY_DN7408_c0_g1	GAW10387.1	hypothetical protein LENED_012645 [Lentinula edodes]	Lentinula_edodes	99.1	1.1e-120
TRINITY_DN7421_c0_g1	P49412.1	RecName: Full=Protein priB	Lentinula_edodes	100	3e-43
TRINITY_DN7422_c0_g1	GAW06624.1	syntaxin-like protein [Lentinula edodes]	Lentinula_edodes	99.1	3.7e-57
TRINITY_DN7451_c0_g2	GAW00585.1	60S ribosomal protein L23 [Lentinula edodes]	Lentinula_edodes	100	1.8e-65
TRINITY_DN7452_c0_g1	GAW00902.1	GTP binding protein [Lentinula edodes]	Lentinula_edodes	97.7	2.8e-08
TRINITY_DN7457_c0_g1	GAW09062.1	hypothetical protein LENED_011191 [Lentinula edodes]	Lentinula_edodes	98.6	2.6e-30
TRINITY_DN7478_c0_g1	GAW10333.1	phenylalanyl-trna synthetase [Lentinula edodes]	Lentinula_edodes	100	2.3e-38
TRINITY_DN7479_c0_g1	GAW06766.1	WD40 repeat-like protein [Lentinula edodes]	Lentinula_edodes	87.3	1.4e-19
TRINITY_DN7534_c0_g1	GAW05362.1	oxysterol binding protein [Lentinula edodes]	Lentinula_edodes	100	1.3e-29
TRINITY_DN7536_c0_g1	GAW01513.1	-dihydroxy-2-butanone 4-phosphate synthase [Lentinula edodes]	Lentinula_edodes	100	7e-34
TRINITY_DN7543_c0_g1	GAV98881.1	beta-flanking protein [Lentinula edodes]	Lentinula_edodes	100	7e-46
TRINITY_DN7668_c0_g2	BAH80449.1	putative MAP kinase [Lentinula edodes]	Lentinula_edodes	98.3	1.3e-25
TRINITY_DN7668_c0_g3	BAH80449.1	putative MAP kinase [Lentinula edodes]	Lentinula_edodes	100	1.5e-48
TRINITY_DN7678_c0_g1	GAV98653.1	glucooligosaccharide oxidase [Lentinula edodes]	Lentinula_edodes	100	1.3e-44
TRINITY_DN768_c0_g1	GAW09390.1	Sm-like ribonucleo protein [Lentinula edodes]	Lentinula_edodes	100	1.3e-50
TRINITY_DN7696_c0_g1	GAW00439.1	hypothetical protein LENED_001956 [Lentinula edodes]	Lentinula_edodes	100	1.6e-31
TRINITY_DN7696_c0_g2	GAW00439.1	hypothetical protein LENED_001956 [Lentinula edodes]	Lentinula_edodes	99.3	4.1e-71
TRINITY_DN7702_c0_g1	GAW02759.1	hypothetical protein LENED_004427 [Lentinula edodes]	Lentinula_edodes	95.2	1.1e-16
TRINITY_DN7732_c0_g1	GAV98665.1	oxalate decarboxylase [Lentinula edodes]	Lentinula_edodes	98.2	1.4e-251
TRINITY_DN774_c0_g1	GAW07366.1	hypothetical protein LENED_009353 [Lentinula edodes]	Lentinula_edodes	98.6	8.7e-33
TRINITY_DN7754_c0_g1	GAW01890.1	peptidase [Lentinula edodes]	Lentinula_edodes	100	1.5e-45
TRINITY_DN7754_c0_g2	GAW01890.1	peptidase [Lentinula edodes]	Lentinula_edodes	99.5	6.6e-101
TRINITY_DN7779_c0_g1	GAW08669.1	hypothetical protein LENED_010745 [Lentinula edodes]	Lentinula_edodes	94.9	2.3e-100
TRINITY_DN7810_c0_g1	GAW05337.1	hypothetical protein LENED_007185 [Lentinula edodes]	Lentinula_edodes	100	5.9e-54
TRINITY_DN7822_c1_g1	GAW08416.1	hypothetical protein LENED_010474 [Lentinula edodes]	Lentinula_edodes	100	6.8e-25
TRINITY_DN7823_c0_g1	GAW05385.1	short-chain dehydrogenase reductase [Lentinula edodes]	Lentinula_edodes	99.5	2.8e-112
TRINITY_DN7854_c0_g1	GAW02140.1	survival factor 1 [Lentinula edodes]	Lentinula_edodes	99	5.8e-53
TRINITY_DN7854_c0_g2	GAW02140.1	survival factor 1 [Lentinula edodes]	Lentinula_edodes	100	3.7e-77
TRINITY_DN7854_c0_g3	GAW02140.1	survival factor 1 [Lentinula edodes]	Lentinula_edodes	100	2.9e-37
TRINITY_DN7860_c0_g1	GAW01188.1	epressed protein [Lentinula edodes]	Lentinula_edodes	98.4	8.1e-29
TRINITY_DN7860_c0_g2	GAW01188.1	epressed protein [Lentinula edodes]	Lentinula_edodes	100	3.1e-62
TRINITY_DN7865_c0_g1	GAW09876.1	carbohydrate-binding module family 43 protein [Lentinula edodes]	Lentinula_edodes	100	2.6e-54
TRINITY_DN7865_c0_g2	GAW09876.1	carbohydrate-binding module family 43 protein [Lentinula edodes]	Lentinula_edodes	100	5.5e-33
TRINITY_DN788_c0_g1	GAW10490.1	60S ribosomal protein L14 [Lentinula edodes]	Lentinula_edodes	100	1.1e-59
TRINITY_DN7925_c0_g1	GAW00181.1	hypothetical protein LENED_001681 [Lentinula edodes]	Lentinula_edodes	100	5.7e-35
TRINITY_DN7989_c0_g1	GAW04577.1	oxidase-like protein [Lentinula edodes]	Lentinula_edodes	98.9	2.1e-44
TRINITY_DN8009_c0_g1	GAW01415.1	wd repeat-containing protein 24 [Lentinula edodes]	Lentinula_edodes	100	1.2e-65
TRINITY_DN8073_c0_g1	GAW09011.1	phosphatidylserine decarboxylase [Lentinula edodes]	Lentinula_edodes	100	1.4e-38
TRINITY_DN8078_c0_g1	BAH80449.1	putative MAP kinase [Lentinula edodes]	Lentinula_edodes	100	3.6e-35
TRINITY_DN8122_c0_g1	GAW01156.1	P-loop containing nucleoside triphosphate hydrolase protein [Lentinula edodes]	Lentinula_edodes	92	3.5e-129
TRINITY_DN8138_c0_g1	GAW06845.1	hypothetical protein LENED_008795 [Lentinula edodes]	Lentinula_edodes	99.3	7.6e-81
TRINITY_DN813_c0_g1	GAW01582.1	hypothetical protein LENED_003184 [Lentinula edodes]	Lentinula_edodes	100	1.8e-52
TRINITY_DN8156_c0_g1	BAH80462.1	putative fungal specific transcription factor [Lentinula edodes]	Lentinula_edodes	98.9	1.6e-47
TRINITY_DN8219_c0_g1	GAW00772.1	C5-sterol desaturase [Lentinula edodes]	Lentinula_edodes	98.9	6.4e-49
TRINITY_DN8234_c0_g1	GAW09349.1	hypothetical protein LENED_011498 [Lentinula edodes]	Lentinula_edodes	100	2.1e-31
TRINITY_DN8234_c0_g2	GAW09349.1	hypothetical protein LENED_011498 [Lentinula edodes]	Lentinula_edodes	100	9.9e-82
TRINITY_DN8239_c0_g1	GAW08575.1	hypothetical protein LENED_010639 [Lentinula edodes]	Lentinula_edodes	98.7	9.1e-36
TRINITY_DN8239_c0_g2	GAW08575.1	hypothetical protein LENED_010639 [Lentinula edodes]	Lentinula_edodes	100	2.9e-46
TRINITY_DN8261_c0_g1	GAW02161.1	cross-pathway control protein [Lentinula edodes]	Lentinula_edodes	100	1.3e-44
TRINITY_DN8265_c0_g1	GAV98887.1	elongation factor EF-2 [Lentinula edodes]	Lentinula_edodes	100	4.1e-51
TRINITY_DN827_c0_g1	GAW09349.1	hypothetical protein LENED_011498 [Lentinula edodes]	Lentinula_edodes	100	3.6e-15
TRINITY_DN8320_c0_g1	GAV99378.1	transcription initiation factor iif subunit beta [Lentinula edodes]	Lentinula_edodes	98.8	1.1e-75
TRINITY_DN832_c0_g1	GAW02287.1	hypothetical protein LENED_003932 [Lentinula edodes]	Lentinula_edodes	85.2	3.6e-142
TRINITY_DN8375_c0_g1	GAW09234.1	Protein VTS1 [Lentinula edodes]	Lentinula_edodes	100	1.3e-79
TRINITY_DN8403_c0_g1	BAD11817.1	cytochrome P450 [Lentinula edodes]	Lentinula_edodes	100	1.7e-31
TRINITY_DN8403_c0_g2	GAV99497.1	cytochrome P450 [Lentinula edodes]	Lentinula_edodes	100	1.8e-38
TRINITY_DN8404_c0_g1	GAW00078.1	cytochrome c oxidase subunit v [Lentinula edodes]	Lentinula_edodes	77.9	1.4e-69
TRINITY_DN8411_c0_g1	GAW07229.1	aryl-alcohol oxidase [Lentinula edodes]	Lentinula_edodes	100	7.5e-34
TRINITY_DN8411_c0_g2	GAW07229.1	aryl-alcohol oxidase [Lentinula edodes]	Lentinula_edodes	100	7e-43
TRINITY_DN8416_c0_g1	GAW06836.1	fruit-body specific protein a [Lentinula edodes]	Lentinula_edodes	93.7	6.7e-91
TRINITY_DN8468_c0_g3	GAW00425.1	PLP-dependent transferase [Lentinula edodes]	Lentinula_edodes	100	2e-31
TRINITY_DN8473_c0_g2	GAW02996.1	Extracellular elastinolytic metalloproteinase [Lentinula edodes]	Lentinula_edodes	100	1.7e-127
TRINITY_DN8485_c0_g1	GAW07994.1	60S ribosomal protein L13a [Lentinula edodes]	Lentinula_edodes	100	1e-62
TRINITY_DN8533_c0_g1	GAW07646.1	acetyl- acetyltransferase [Lentinula edodes]	Lentinula_edodes	100	3.9e-204
TRINITY_DN8538_c0_g1	GAW09059.1	Pre protein translocase Sec Sec61-beta subunit [Lentinula edodes]	Lentinula_edodes	100	6.5e-43
TRINITY_DN8567_c0_g1	BAH80452.1	putative HLH transcription factor [Lentinula edodes]	Lentinula_edodes	100	3.4e-11
TRINITY_DN8577_c0_g1	GAW10509.1	hypothetical protein LENED_012785 [Lentinula edodes]	Lentinula_edodes	77.4	1.6e-18
TRINITY_DN8579_c0_g1	GAW00568.1	carbohydrate esterase family 9 protein [Lentinula edodes]	Lentinula_edodes	91.7	1.8e-116
TRINITY_DN8585_c0_g1	GAW09974.1	40s ribosomal protein s15 [Lentinula edodes]	Lentinula_edodes	100	6.2e-33
TRINITY_DN8593_c0_g1	BAF76763.1	hypothetical protein [Lentinula edodes]	Lentinula_edodes	97.8	2.6e-42
TRINITY_DN8604_c0_g1	GAW02541.1	TBP-domain-containing protein [Lentinula edodes]	Lentinula_edodes	100	2.6e-28
TRINITY_DN8611_c0_g1	GAW05189.1	mitochondrial carrier [Lentinula edodes]	Lentinula_edodes	100	2.4e-56
TRINITY_DN8611_c0_g2	GAW05189.1	mitochondrial carrier [Lentinula edodes]	Lentinula_edodes	100	3.2e-52
TRINITY_DN8619_c0_g1	GAW02006.1	acid protease [Lentinula edodes]	Lentinula_edodes	98.6	4.9e-31
TRINITY_DN8624_c0_g1	GAW03408.1	carbohydrate esterase family 4 protein [Lentinula edodes]	Lentinula_edodes	98.1	3e-89
TRINITY_DN8624_c0_g2	GAW03408.1	carbohydrate esterase family 4 protein [Lentinula edodes]	Lentinula_edodes	93.1	3.5e-43
TRINITY_DN8626_c0_g1	GAW00496.1	glycoside hydrolase family 16 protein [Lentinula edodes]	Lentinula_edodes	100	3e-49
TRINITY_DN8626_c0_g2	GAW00496.1	glycoside hydrolase family 16 protein [Lentinula edodes]	Lentinula_edodes	100	1.2e-07
TRINITY_DN8626_c0_g3	GAW00496.1	glycoside hydrolase family 16 protein [Lentinula edodes]	Lentinula_edodes	100	3.2e-45
TRINITY_DN865_c0_g1	GAW05771.1	cytoplasmic protein [Lentinula edodes]	Lentinula_edodes	100	5.7e-48
TRINITY_DN8668_c0_g1	GAW00924.1	ketol-acid reductoisomerase [Lentinula edodes]	Lentinula_edodes	40	5.2e-11
TRINITY_DN8718_c0_g1	GAW06195.1	hypothetical protein LENED_008098 [Lentinula edodes]	Lentinula_edodes	92.6	9.3e-23
TRINITY_DN8738_c0_g1	GAW03313.1	hypothetical protein LENED_005031 [Lentinula edodes]	Lentinula_edodes	100	1e-96
TRINITY_DN873_c0_g1	GAW03439.1	hypothetical protein LENED_005165 [Lentinula edodes]	Lentinula_edodes	91.3	2.6e-14
TRINITY_DN8771_c0_g1	GAV99550.1	c2h2 conidiation transcription factor [Lentinula edodes]	Lentinula_edodes	99.1	6.7e-103
TRINITY_DN8771_c0_g2	GAV99550.1	c2h2 conidiation transcription factor [Lentinula edodes]	Lentinula_edodes	97.5	9.6e-16
TRINITY_DN8777_c0_g1	GAV99013.1	nicotinate-nucleotide diphosphorylase [Lentinula edodes]	Lentinula_edodes	89.2	4.7e-58
TRINITY_DN8813_c0_g1	GAW01153.1	related to ATP-binding cassette transporter [Lentinula edodes]	Lentinula_edodes	80	4.1e-38
TRINITY_DN8815_c0_g2	GAW07211.1	glycosyltransferase family 2 protein [Lentinula edodes]	Lentinula_edodes	100	3.5e-60
TRINITY_DN8815_c0_g3	GAW01555.1	hypothetical protein LENED_003157 [Lentinula edodes]	Lentinula_edodes	90.3	1.9e-98
TRINITY_DN8820_c0_g1	GAW06120.1	eukaryotic translation initiation factor 4E class I [Lentinula edodes]	Lentinula_edodes	100	5e-25
TRINITY_DN8820_c0_g2	GAW06120.1	eukaryotic translation initiation factor 4E class I [Lentinula edodes]	Lentinula_edodes	100	5.5e-54
TRINITY_DN883_c0_g1	BAN58304.1	heat shock protein 9 [Lentinula edodes]	Lentinula_edodes	97.6	1.1e-20
TRINITY_DN8901_c0_g1	GAW03659.1	protein serine threonine phosphatase 2C [Lentinula edodes]	Lentinula_edodes	100	4.4e-38
TRINITY_DN8905_c0_g1	GAW08260.1	hypothetical protein LENED_010312 [Lentinula edodes]	Lentinula_edodes	100	1e-81
TRINITY_DN891_c0_g1	ABG33689.1	mitochondrial developmentally regulated MAPK-interacting protein, partial [Lentinula edodes]	Lentinula_edodes	99	6.5e-68
TRINITY_DN8939_c0_g1	GAW03991.1	s-adenosyl-l-homocysteine hydrolase [Lentinula edodes]	Lentinula_edodes	100	1.3e-44
TRINITY_DN9048_c0_g1	GAW01951.1	nucleus protein [Lentinula edodes]	Lentinula_edodes	100	2.3e-102
TRINITY_DN907_c0_g1	GAW01940.1	Pkinase-domain-containing protein [Lentinula edodes]	Lentinula_edodes	100	3.2e-26
TRINITY_DN9094_c0_g1	GAW09988.1	Rcd1-domain-containing protein [Lentinula edodes]	Lentinula_edodes	98.5	8.8e-30
TRINITY_DN9103_c0_g1	GAW04921.1	hypothetical protein LENED_006745 [Lentinula edodes]	Lentinula_edodes	96.6	6.5e-24
TRINITY_DN9113_c0_g1	GAW01293.1	60S ribosomal protein L7 [Lentinula edodes]	Lentinula_edodes	100	3.9e-65
TRINITY_DN9113_c0_g2	GAW01293.1	60S ribosomal protein L7 [Lentinula edodes]	Lentinula_edodes	99.2	6.5e-47
TRINITY_DN9135_c0_g1	GAW09842.1	inositol-3-phosphate synthase [Lentinula edodes]	Lentinula_edodes	100	4.5e-51
TRINITY_DN9135_c0_g2	GAW09842.1	inositol-3-phosphate synthase [Lentinula edodes]	Lentinula_edodes	100	8.8e-86
TRINITY_DN9217_c0_g1	GAW01424.1	copper p-type atpase [Lentinula edodes]	Lentinula_edodes	100	4.6e-32
TRINITY_DN9256_c0_g1	GAW04249.1	peptidylprolyl isomerase B [Lentinula edodes]	Lentinula_edodes	100	6.8e-115
TRINITY_DN9277_c0_g1	GAV99588.1	hypothetical protein LENED_001054 [Lentinula edodes]	Lentinula_edodes	100	9.8e-37
TRINITY_DN9307_c0_g1	GAW00019.1	lipid droplet-associated perilipin protein [Lentinula edodes]	Lentinula_edodes	100	2e-26
TRINITY_DN9318_c0_g1	GAW09998.1	hypothetical protein LENED_012220 [Lentinula edodes]	Lentinula_edodes	75.4	8.1e-20
TRINITY_DN9428_c0_g1	GAW03978.1	acid protease [Lentinula edodes]	Lentinula_edodes	100	2e-18
TRINITY_DN9492_c0_g1	GAW09686.1	15-hydroxyprostaglandin dehydrogenase (nad(+)) protein [Lentinula edodes]	Lentinula_edodes	100	5e-43
TRINITY_DN9504_c0_g1	GAW07966.1	kinase-like protein [Lentinula edodes]	Lentinula_edodes	100	2.5e-39
TRINITY_DN9560_c0_g1	GAW03107.1	amidohydrolase family protein [Lentinula edodes]	Lentinula_edodes	100	1.2e-47
TRINITY_DN9560_c0_g3	GAW03107.1	amidohydrolase family protein [Lentinula edodes]	Lentinula_edodes	98.6	2.1e-31
TRINITY_DN9612_c0_g1	GAV99332.1	amino acid permease-like protein [Lentinula edodes]	Lentinula_edodes	100	2.4e-59
TRINITY_DN9612_c0_g2	GAV99332.1	amino acid permease-like protein [Lentinula edodes]	Lentinula_edodes	100	4.2e-84
TRINITY_DN9612_c0_g3	GAV99332.1	amino acid permease-like protein [Lentinula edodes]	Lentinula_edodes	100	1.2e-120
TRINITY_DN9639_c0_g1	GAW06862.1	glutaredoxin [Lentinula edodes]	Lentinula_edodes	100	1.3e-50
TRINITY_DN9642_c1_g1	BAH80465.1	putative GATA type transcriptional activator [Lentinula edodes]	Lentinula_edodes	100	1.2e-33
TRINITY_DN9646_c0_g1	GAW05551.1	late embryogenesis abundant protein [Lentinula edodes]	Lentinula_edodes	100	2.4e-08
TRINITY_DN9672_c0_g1	GAW06921.1	protein [Lentinula edodes]	Lentinula_edodes	97.4	1.3e-31
TRINITY_DN9672_c0_g2	GAW06921.1	protein [Lentinula edodes]	Lentinula_edodes	100	2.7e-51
TRINITY_DN9683_c0_g1	GAW07409.1	6-phosphofructokinase [Lentinula edodes]	Lentinula_edodes	100	4.1e-39
TRINITY_DN9701_c0_g1	GAW00254.1	actin-related protein ARPC3 [Lentinula edodes]	Lentinula_edodes	100	3.1e-52
TRINITY_DN9709_c0_g1	GAW00704.1	nadp-aldehyde dehydrogenase [Lentinula edodes]	Lentinula_edodes	100	2.5e-43
TRINITY_DN9772_c0_g1	GAW10377.1	Mn superoxide dismutase [Lentinula edodes]	Lentinula_edodes	100	1.5e-117
TRINITY_DN9793_c0_g1	GAW07283.1	barwin-like endoglucanase [Lentinula edodes]	Lentinula_edodes	100	1.1e-16
TRINITY_DN9824_c0_g2	GAW07589.1	cytoplasmic protein [Lentinula edodes]	Lentinula_edodes	100	8.1e-32
TRINITY_DN9832_c0_g1	BAF56680.1	CIPB [Lentinula edodes]	Lentinula_edodes	98.4	1.2e-49
TRINITY_DN9833_c0_g1	GAW01653.1	60S ribosomal protein L10A [Lentinula edodes]	Lentinula_edodes	99.1	6.3e-54
TRINITY_DN9834_c0_g1	GAW02795.1	acyl- N-acyltransferase [Lentinula edodes]	Lentinula_edodes	100	3.5e-31
TRINITY_DN9834_c0_g2	GAW02795.1	acyl- N-acyltransferase [Lentinula edodes]	Lentinula_edodes	100	6.6e-41
TRINITY_DN9842_c0_g1	GAW06748.1	hypothetical protein LENED_008694 [Lentinula edodes]	Lentinula_edodes	100	4.3e-58
TRINITY_DN9842_c0_g2	GAW06748.1	hypothetical protein LENED_008694 [Lentinula edodes]	Lentinula_edodes	99	8.3e-54
TRINITY_DN9846_c0_g1	GAV99235.1	MFS general substrate transporter [Lentinula edodes]	Lentinula_edodes	100	2.1e-41
TRINITY_DN9846_c0_g2	GAV99235.1	MFS general substrate transporter [Lentinula edodes]	Lentinula_edodes	100	6.5e-15
TRINITY_DN9886_c0_g1	GAV99013.1	nicotinate-nucleotide diphosphorylase [Lentinula edodes]	Lentinula_edodes	100	5.9e-31
TRINITY_DN9922_c0_g1	GAW00053.1	hypothetical protein LENED_001545 [Lentinula edodes]	Lentinula_edodes	100	1.6e-50
TRINITY_DN9933_c0_g1	GAW10076.1	hypothetical protein LENED_012304 [Lentinula edodes]	Lentinula_edodes	98.5	1.5e-67
TRINITY_DN9950_c1_g1	GAW06793.1	Mitochondrial Rho GTPase 1 [Lentinula edodes]	Lentinula_edodes	100	4.4e-29
TRINITY_DN9950_c1_g2	GAW06793.1	Mitochondrial Rho GTPase 1 [Lentinula edodes]	Lentinula_edodes	100	1.3e-53
TRINITY_DN9961_c0_g1	GAW01718.1	P-loop containing nucleoside triphosphate hydrolase protein [Lentinula edodes]	Lentinula_edodes	100	7e-88
TRINITY_DN996_c0_g1	AAP13582.1	Ras-related protein Rab7 [Lentinula edodes]	Lentinula_edodes	100	1.2e-34
TRINITY_DN996_c0_g2	AAP13582.1	Ras-related protein Rab7 [Lentinula edodes]	Lentinula_edodes	100	2.7e-54
TRINITY_DN9987_c0_g1	GAW07658.1	NAD-aldehyde dehydrogenase [Lentinula edodes]	Lentinula_edodes	100	4.9e-69
TRINITY_DN9998_c0_g2	GAW05711.1	amino acid transporter [Lentinula edodes]	Lentinula_edodes	87	2.2e-80
TRINITY_DN12266_c0_g1	RPD65698.1	Mov34-domain-containing protein [Lentinus tigrinus ALCF2SS1-6]	Lentinus_tigrinus	49.2	7e-08
TRINITY_DN10734_c0_g2	OCK78275.1	ankyrin repeat protein, partial [Lepidopterella palustris CBS 459.81]	Lepidopterella_palustris	42.5	1.4e-06
TRINITY_DN1045_c0_g1	XP_003834284.1	similar to peptidyl-prolyl cis-trans isomerase [Leptosphaeria maculans JN3]	Leptosphaeria_maculans	84.8	5.4e-82
TRINITY_DN12879_c0_g1	XP_003841524.1	hypothetical protein LEMA_P094540.1 [Leptosphaeria maculans JN3]	Leptosphaeria_maculans	100	4.7e-43
TRINITY_DN14264_c2_g1	XP_003841507.1	similar to protein disulfide-isomerase [Leptosphaeria maculans JN3]	Leptosphaeria_maculans	39.8	4.1e-79
TRINITY_DN14265_c0_g2	KXN89446.1	hypothetical protein AN958_05608 [Leucoagaricus sp. SymC.cos]	Leucoagaricus_sp._SymC.cos	83.3	2.2e-26
TRINITY_DN14268_c1_g2	KXN82946.1	Calmodulin [Leucoagaricus sp. SymC.cos]	Leucoagaricus_sp._SymC.cos	30.2	3.5e-08
TRINITY_DN4564_c0_g1	KXN85919.1	Glyceraldehyde-3-phosphate dehydrogenase 2 [Leucoagaricus sp. SymC.cos]	Leucoagaricus_sp._SymC.cos	34.1	3.9e-08
TRINITY_DN11936_c0_g2	ORY87460.1	glutathione S-transferase [Leucosporidium creatinivorum]	Leucosporidium_creatinivorum	31.4	1.4e-14
TRINITY_DN1096_c0_g1	CDH54180.1	ccaat-binding factor complex subunit [Lichtheimia corymbifera JMRC:FSU:9682]	Lichtheimia_corymbifera	70.5	9.3e-36
TRINITY_DN11401_c0_g1	CDH59728.1	nedd8 [Lichtheimia corymbifera JMRC:FSU:9682]	Lichtheimia_corymbifera	86.8	5.5e-28
TRINITY_DN11401_c0_g2	CDH59728.1	nedd8 [Lichtheimia corymbifera JMRC:FSU:9682]	Lichtheimia_corymbifera	86.8	5.6e-28
TRINITY_DN14229_c0_g1	CDH57594.1	60s ribosomal protein l4 [Lichtheimia corymbifera JMRC:FSU:9682]	Lichtheimia_corymbifera	60.3	1.9e-122
TRINITY_DN14229_c0_g2	CDH57594.1	60s ribosomal protein l4 [Lichtheimia corymbifera JMRC:FSU:9682]	Lichtheimia_corymbifera	62.5	3e-123
TRINITY_DN14977_c0_g1	CDH52400.1	endopeptidase [Lichtheimia corymbifera JMRC:FSU:9682]	Lichtheimia_corymbifera	43.4	1.7e-86
TRINITY_DN16724_c0_g1	CDH50129.1	biogenesis of lysosome-related organellescomplex 1 subunit 1 [Lichtheimia corymbifera JMRC:FSU:9682]	Lichtheimia_corymbifera	44.4	4.4e-17
TRINITY_DN3849_c0_g2	CDH52281.1	haloacid dehalogenase-like hydrolase domain-containing protein 3 [Lichtheimia corymbifera JMRC:FSU:9682]	Lichtheimia_corymbifera	27.7	3e-20
TRINITY_DN5848_c0_g1	CDH48982.1	40s ribosomal protein s2 [Lichtheimia corymbifera JMRC:FSU:9682]	Lichtheimia_corymbifera	77.7	2.8e-94
TRINITY_DN688_c0_g1	CDH58346.1	ubiquitin conjugating enzyme [Lichtheimia corymbifera JMRC:FSU:9682]	Lichtheimia_corymbifera	82.1	9.7e-67
TRINITY_DN7090_c0_g1	CDH55973.1	hypothetical protein RO3G_05694 [Lichtheimia corymbifera JMRC:FSU:9682]	Lichtheimia_corymbifera	41.6	2.8e-08
TRINITY_DN11038_c0_g3	CDS13582.1	hypothetical protein LRAMOSA05758 [Lichtheimia ramosa]	Lichtheimia_ramosa	64.3	1.7e-30
TRINITY_DN11604_c1_g1	CDS06372.1	hypothetical protein LRAMOSA08900 [Lichtheimia ramosa]	Lichtheimia_ramosa	82.8	6.5e-36
TRINITY_DN12105_c0_g1	CDS12319.1	hypothetical protein LRAMOSA04514 [Lichtheimia ramosa]	Lichtheimia_ramosa	55.3	2.3e-20
TRINITY_DN12351_c0_g2	CDS10237.1	hypothetical protein LRAMOSA02913 [Lichtheimia ramosa]	Lichtheimia_ramosa	44.1	4.5e-26
TRINITY_DN12980_c0_g4	CDS05850.1	Putative Isocitrate dehydrogenase [Lichtheimia ramosa]	Lichtheimia_ramosa	78.9	6.9e-70
TRINITY_DN13131_c0_g1	CDS08965.1	hypothetical protein LRAMOSA10325 [Lichtheimia ramosa]	Lichtheimia_ramosa	57.3	1.4e-26
TRINITY_DN13173_c0_g1	CDS12245.1	Putative 40S ribosomal protein S17-B [Lichtheimia ramosa]	Lichtheimia_ramosa	70.9	7.8e-46
TRINITY_DN13173_c0_g2	CDS12245.1	Putative 40S ribosomal protein S17-B [Lichtheimia ramosa]	Lichtheimia_ramosa	70.9	6.4e-46
TRINITY_DN13502_c1_g3	CDS02839.1	hypothetical protein LRAMOSA00242 [Lichtheimia ramosa]	Lichtheimia_ramosa	45.9	2.5e-31
TRINITY_DN14207_c0_g1	CDS05316.1	hypothetical protein LRAMOSA07845 [Lichtheimia ramosa]	Lichtheimia_ramosa	46.2	2.7e-38
TRINITY_DN15565_c0_g1	CDS12370.1	hypothetical protein LRAMOSA04565 [Lichtheimia ramosa]	Lichtheimia_ramosa	70.2	1.2e-25
TRINITY_DN16632_c0_g1	CDS12370.1	hypothetical protein LRAMOSA04565 [Lichtheimia ramosa]	Lichtheimia_ramosa	52.6	3.7e-15
TRINITY_DN16731_c0_g1	CDS14171.1	hypothetical protein LRAMOSA06341 [Lichtheimia ramosa]	Lichtheimia_ramosa	64.8	2e-24
TRINITY_DN5204_c0_g1	CDS05348.1	hypothetical protein LRAMOSA07877 [Lichtheimia ramosa]	Lichtheimia_ramosa	45.7	4.3e-06
TRINITY_DN1145_c0_g1	ORX67261.1	NAD(P)-binding protein [Linderina pennispora]	Linderina_pennispora	53.4	2.3e-12
TRINITY_DN13219_c0_g1	ORX73886.1	Rab5-interacting [Linderina pennispora]	Linderina_pennispora	36.7	1.2e-09
TRINITY_DN13459_c0_g3	ORX69064.1	serine hydroxymethyltransferase, mitochondrial-like protein [Linderina pennispora]	Linderina_pennispora	76.8	3.7e-42
TRINITY_DN14226_c0_g2	ORX71356.1	protein disulfide isomerase [Linderina pennispora]	Linderina_pennispora	47.1	1.3e-09
TRINITY_DN14899_c0_g1	ORX68836.1	40S ribosomal protein S22-A [Linderina pennispora]	Linderina_pennispora	83.8	4.1e-58
[truncated: 11,287 more rows]

## Sheet: Table S6
Table S6. Functional annotation of unigenes in the NR, Swiss-prot, Pfam, COG, GO, and KEGG databases.
Gene_ID	Length	Trans_ID	Annotation	Name	swissprot_description	GO_Term	NOG	KOEntry	KODescription	EC	KEGG_Pathway	Pfam_description
TRINITY_DN10001_c0_g1	254	TRINITY_DN10001_c0_g1_i1	glycogen debranching enzyme [Rhizoctonia solani AG-1 IA]	AGL	Glycogen debranching enzyme OS=Canis lupus familiaris GN=AGL PE=2 SV=1	GO:0004134(4-alpha-glucanotransferase activity);GO:0004135(amylo-alpha-1,6-glucosidase activity);GO:0005634(nucleus);GO:0005737(cytoplasm);GO:0005978(glycogen biosynthetic process);GO:0005980(glycogen catabolic process);GO:0016234(inclusion body);GO:0030247(polysaccharide binding);GO:0031593(polyubiquitin modification-dependent protein binding)	COG3408(Glycogen debranching enzyme)	K01196	glycogen debranching enzyme	EC:2.4.1.25 3.2.1.33	cdu00500(Starch and sucrose metabolism)	G3UCH9.1 PF06202.12;GDE_C;
TRINITY_DN10001_c0_g3	450	TRINITY_DN10001_c0_g3_i1	Glycogen debranching enzyme [Candida viswanathii]	AGL	Glycogen debranching enzyme OS=Homo sapiens GN=AGL PE=1 SV=3	GO:0004133(glycogen debranching enzyme activity);GO:0004134(4-alpha-glucanotransferase activity);GO:0004135(amylo-alpha-1,6-glucosidase activity);GO:0005634(nucleus);GO:0005737(cytoplasm);GO:0005977(glycogen metabolic process);GO:0005978(glycogen biosynthetic process);GO:0005980(glycogen catabolic process);GO:0007584(response to nutrient);GO:0009725(response to hormone);GO:0016234(inclusion body)…	COG3408(Glycogen debranching enzyme)	K01196	glycogen debranching enzyme	EC:2.4.1.25 3.2.1.33	ctp00500(Starch and sucrose metabolism)	H0VJR7.1 PF06202.12;GDE_C;
TRINITY_DN10002_c0_g1	2238	TRINITY_DN10002_c0_g1_i1;TRINITY_DN10002_c0_g1_i2	hypothetical protein P167DRAFT_548542 [Morchella conica CCBAS932]	-	-	-	-	-	-	-	-	-
TRINITY_DN10004_c0_g1	1757	TRINITY_DN10004_c0_g1_i1	rab GTPase activator [Morchella conica CCBAS932]	GDI1	Rab GDP-dissociation inhibitor OS=Saccharomyces cerevisiae (strain ATCC 204508 / S288c) GN=GDI1 PE=1 SV=1	GO:0005092(GDP-dissociation inhibitor activity);GO:0005093(Rab GDP-dissociation inhibitor activity);GO:0005829(cytosol);GO:0007264(small GTPase mediated signal transduction);GO:0015031(protein transport);GO:0032153(cell division site)	COG5044(GDP dissociation inhibitor)	NA	NA	NA	NA(NA)	D5GE65.1 PF00996.16;GDI;
TRINITY_DN10004_c0_g2	702	TRINITY_DN10004_c0_g2_i1	hypothetical protein P167DRAFT_525408 [Morchella conica CCBAS932]	-	-	GO:0003674(molecular_function);GO:0005575(cellular_component);GO:0008150(biological_process)	ENOG410XSTE(trafficking protein particle complex)	NA	NA	NA	NA(NA)	D5GAQ5.1 PF07919.10;Gryzun;
TRINITY_DN10004_c0_g3	1272	TRINITY_DN10004_c0_g3_i1	hypothetical protein P167DRAFT_525408 [Morchella conica CCBAS932]	-	-	GO:0003674(molecular_function);GO:0005575(cellular_component);GO:0008150(biological_process)	ENOG410XSTE(trafficking protein particle complex)	NA	NA	NA	NA(NA)	D5GAQ5.1 PF07919.10;Gryzun;
TRINITY_DN10005_c0_g1	2011	TRINITY_DN10005_c0_g1_i1;TRINITY_DN10005_c0_g1_i2	-	-	-	-	-	-	-	-	-	-
TRINITY_DN10006_c0_g1	294	TRINITY_DN10006_c0_g1_i1	-	-	-	-	-	-	-	-	-	-
TRINITY_DN10008_c0_g1	471	TRINITY_DN10008_c0_g1_i1	hypothetical protein T552_01362 [Pneumocystis carinii B80]	GPX6	Probable phospholipid hydroperoxide glutathione peroxidase 6, mitochondrial OS=Arabidopsis thaliana GN=GPX6 PE=2 SV=2	GO:0004602(glutathione peroxidase activity);GO:0005739(mitochondrion);GO:0005829(cytosol);GO:0005886(plasma membrane);GO:0006979(response to oxidative stress);GO:0009507(chloroplast);GO:0009651(response to salt stress);GO:0046686(response to cadmium ion);GO:0047066(phospholipid-hydroperoxide glutathione peroxidase activity);GO:0048046(apoplast);GO:0055114(oxidation-reduction process);GO:0098869(c…	COG0386(glutathione peroxidase)	K00432	glutathione peroxidase	EC:1.11.1.9	adl00590(Arachidonic acid metabolism);adl00480(Glutathione metabolism)	A0A0E0PCG8.1 PF00255.17;GSHPx;
TRINITY_DN1000_c0_g1	221	TRINITY_DN1000_c0_g1_i1	hypothetical protein P167DRAFT_539908 [Morchella conica CCBAS932]	-	-	GO:0004185(serine-type carboxypeptidase activity);GO:0006508(proteolysis);GO:0008239(dipeptidyl-peptidase activity)	ENOG410XSGG(protease, serine, 16 (thymus))	-	-	-	-	D5G8Z4.1 PF05577.10;Peptidase_S28;
TRINITY_DN10010_c0_g1	400	TRINITY_DN10010_c0_g1_i1	-	-	-	-	-	-	-	-	-	-
TRINITY_DN10010_c0_g2	287	TRINITY_DN10010_c0_g2_i1	-	-	-	-	-	-	-	-	-	-
TRINITY_DN10012_c0_g1	1190	TRINITY_DN10012_c0_g1_i1	hypothetical protein P167DRAFT_535641 [Morchella conica CCBAS932]	SPAC23C4.06c	UPF0665 family protein C23C4.06c OS=Schizosaccharomyces pombe (strain 972 / ATCC 24843) GN=SPAC23C4.06c PE=3 SV=1	GO:0003674(molecular_function);GO:0005634(nucleus);GO:0005829(cytosol);GO:0008150(biological_process)	COG0500(Methyltransferase)	NA	NA	NA	NA(NA)	A0A0G2ENB4.1 PF10294.7;Methyltransf_16;
TRINITY_DN10013_c0_g1	508	TRINITY_DN10013_c0_g1_i1	-	C3	Complement C3 OS=Mus musculus GN=C3 PE=1 SV=3	GO:0001798(positive regulation of type IIa hypersensitivity);GO:0001934(positive regulation of protein phosphorylation);GO:0001970(positive regulation of activation of membrane attack complex);GO:0002376(immune system process);GO:0004866(endopeptidase inhibitor activity);GO:0005515(protein binding);GO:0005576(extracellular region);GO:0005615(extracellular space);GO:0006629(lipid metabolic process…	ENOG410XRED(Complement component)	-	-	-	-	M0RBF1.1 PF01759.19;NTR;
TRINITY_DN10013_c0_g2	623	TRINITY_DN10013_c0_g2_i1	-	C3	Complement C3 OS=Mus musculus GN=C3 PE=1 SV=3	GO:0001798(positive regulation of type IIa hypersensitivity);GO:0001934(positive regulation of protein phosphorylation);GO:0001970(positive regulation of activation of membrane attack complex);GO:0002376(immune system process);GO:0004866(endopeptidase inhibitor activity);GO:0005515(protein binding);GO:0005576(extracellular region);GO:0005615(extracellular space);GO:0006629(lipid metabolic process…	ENOG410XRED(Complement component)	-	-	-	-	M0RBJ7.1 PF07677.12;A2M_recep;
TRINITY_DN10013_c0_g3	490	TRINITY_DN10013_c0_g3_i1	-	C3	Complement C3 OS=Mus musculus GN=C3 PE=1 SV=3	GO:0001798(positive regulation of type IIa hypersensitivity);GO:0001934(positive regulation of protein phosphorylation);GO:0001970(positive regulation of activation of membrane attack complex);GO:0002376(immune system process);GO:0004866(endopeptidase inhibitor activity);GO:0005515(protein binding);GO:0005576(extracellular region);GO:0005615(extracellular space);GO:0006629(lipid metabolic process…	ENOG410XRED(Complement component)	-	-	-	-	P01026.3 PF07678.12;A2M_comp;
TRINITY_DN10015_c0_g1	317	TRINITY_DN10015_c0_g1_i1	hypothetical protein P167DRAFT_601452 [Morchella conica CCBAS932]	-	-	-	-	-	-	-	-	-
TRINITY_DN10015_c0_g2	865	TRINITY_DN10015_c0_g2_i1	hypothetical protein P167DRAFT_601452 [Morchella conica CCBAS932]	-	-	-	-	-	-	-	-	-
TRINITY_DN10015_c0_g3	549	TRINITY_DN10015_c0_g3_i1	hypothetical protein P167DRAFT_601452 [Morchella conica CCBAS932]	-	-	-	-	-	-	-	-	-
TRINITY_DN10016_c0_g1	222	TRINITY_DN10016_c0_g1_i1;TRINITY_DN10016_c0_g1_i2	small nuclear ribonucleoprotein F [Spizellomyces punctatus DAOM BR117]	SNRPF	Small nuclear ribonucleoprotein F OS=Bos taurus GN=SNRPF PE=3 SV=2	GO:0000387(spliceosomal snRNP assembly);GO:0000398(mRNA splicing, via spliceosome);GO:0003723(RNA binding);GO:0005683(U7 snRNP);GO:0005685(U1 snRNP);GO:0005687(U4 snRNP);GO:0005689(U12-type spliceosomal complex);GO:0005829(cytosol);GO:0034709(methylosome);GO:0034715(pICln-Sm protein complex);GO:0034719(SMN-Sm protein complex);GO:0071013(catalytic step 2 spliceosome);GO:0098779(positive regulation…	ENOG4111W47(small nuclear ribonucleoprotein)	K11098	small nuclear ribonucleoprotein F	-	lbc03040(Spliceosome)	A0A0P7XD74.1 PF01423.20;LSM;
TRINITY_DN10018_c0_g1	258	TRINITY_DN10018_c0_g1_i1	putative protein sorting protein [Schizosaccharomyces pombe]	Prelid1	PRELI domain-containing protein 1, mitochondrial OS=Mus musculus GN=Prelid1 PE=1 SV=1	GO:0005654(nucleoplasm);GO:0005758(mitochondrial intermembrane space);GO:0010917(negative regulation of mitochondrial membrane potential);GO:0010950(positive regulation of endopeptidase activity);GO:0015914(phospholipid transport);GO:0045580(regulation of T cell differentiation);GO:0070234(positive regulation of T cell apoptotic process);GO:0090201(negative regulation of release of cytochrome c f…	ENOG411110V(PRELI domain containing 1)	-	-	-	-	G1P8A9.1 PF04707.12;PRELI;
TRINITY_DN10019_c0_g1	231	TRINITY_DN10019_c0_g1_i1	Pkinase-domain-containing protein [Conidiobolus coronatus NRRL 28638]	SGK1	Serine/threonine-protein kinase Sgk1 OS=Bos taurus GN=SGK1 PE=2 SV=1	GO:0001558(regulation of cell growth);GO:0004674(protein serine/threonine kinase activity);GO:0004712(protein serine/threonine/tyrosine kinase activity);GO:0005246(calcium channel regulator activity);GO:0005524(ATP binding);GO:0005634(nucleus);GO:0005654(nucleoplasm);GO:0005737(cytoplasm);GO:0005783(endoplasmic reticulum);GO:0006883(cellular sodium ion homeostasis);GO:0006915(apoptotic process);G…	ENOG410XNPH(protein serine/threonine kinase activity)	NA	NA	NA	NA(NA)	A0A0G2JVM7.1 PF00069.23;Pkinase;
TRINITY_DN10020_c0_g1	332	TRINITY_DN10020_c0_g1_i1	hypothetical protein GYMLUDRAFT_80382 [Gymnopus luxurians FD-317 M1]	TRPC	Multifunctional tryptophan biosynthesis protein OS=Phanerochaete chrysosporium GN=TRPC PE=3 SV=1	GO:0000162(tryptophan biosynthetic process);GO:0004049(anthranilate synthase activity);GO:0005829(cytosol);GO:0005950(anthranilate synthase complex)	COG0134(indole-3-glycerol phosphate synthase);COG0135(N-(5'-phosphoribosyl)anthranilate isomerase);COG0512(anthranilate synthase)	K13501	anthranilate synthase / indole-3-glycerol phosphate synthase / phosphoribosylanthranilate isomerase	EC:4.1.3.27 4.1.1.48 5.3.1.24	mrr00400(Phenylalanine, tyrosine and tryptophan biosynthesis)	V2XMJ7.1 PF00117.26;GATase;
TRINITY_DN10021_c0_g1	553	TRINITY_DN10021_c0_g1_i1	hypothetical protein Glove_134g41 [Diversispora versiformis]	Dhrs7c	Dehydrogenase/reductase SDR family member 7C OS=Mus musculus GN=Dhrs7c PE=1 SV=3	GO:0004745(retinol dehydrogenase activity);GO:0005576(extracellular region);GO:0010880(regulation of release of sequestered calcium ion into cytosol by sarcoplasmic reticulum);GO:0014801(longitudinal sarcoplasmic reticulum);GO:0016491(oxidoreductase activity);GO:0033017(sarcoplasmic reticulum membrane);GO:0055114(oxidation-reduction process)	COG1028(Dehydrogenase reductase)	NA	NA	NA	NA(NA)	Q8CHS7.3 PF00106.23;adh_short;
TRINITY_DN10025_c0_g1	239	TRINITY_DN10025_c0_g1_i1	actin-like ATPase domain-containing protein [Morchella conica CCBAS932]	SPAC1F5.06	Heat shock protein 70 homolog lhs1 OS=Schizosaccharomyces pombe (strain 972 / ATCC 24843) GN=SPAC1F5.06 PE=3 SV=1	GO:0003674(molecular_function);GO:0005783(endoplasmic reticulum);GO:0008150(biological_process)	COG0443(Heat shock protein)	K09486	hypoxia up-regulated 1	-	tml04141(Protein processing in endoplasmic reticulum)	D5G8L3.1 PF00012.18;HSP70;
TRINITY_DN10025_c0_g2	2795	TRINITY_DN10025_c0_g2_i1	actin-like ATPase domain-containing protein [Morchella conica CCBAS932]	HYOU1	Hypoxia up-regulated protein 1 OS=Homo sapiens GN=HYOU1 PE=1 SV=1	GO:0003674(molecular_function);GO:0005783(endoplasmic reticulum);GO:0008150(biological_process)	COG0443(Heat shock protein)	K09486	hypoxia up-regulated 1	-	tml04141(Protein processing in endoplasmic reticulum)	D5G8L3.1 PF00012.18;HSP70;
TRINITY_DN10027_c0_g1	205	TRINITY_DN10027_c0_g1_i1	-	Cltb	Clathrin light chain B OS=Mus musculus GN=Cltb PE=1 SV=1	GO:0005198(structural molecule activity);GO:0005802(trans-Golgi network);GO:0005829(cytosol);GO:0005886(plasma membrane);GO:0005905(clathrin-coated pit);GO:0006886(intracellular protein transport);GO:0016020(membrane);GO:0016192(vesicle-mediated transport);GO:0030118(clathrin coat);GO:0030125(clathrin vesicle coat);GO:0030130(clathrin coat of trans-Golgi network vesicle);GO:0030132(clathrin coat …	ENOG4111J5K(clathrin light chain)	-	-	-	-	Q6IRU5.1 PF01086.15;Clathrin_lg_ch;
TRINITY_DN10028_c0_g1	302	TRINITY_DN10028_c0_g1_i1	acyl- oxidase [Lentinula edodes]	Acadsb	Short/branched chain specific acyl-CoA dehydrogenase, mitochondrial OS=Mus musculus GN=Acadsb PE=1 SV=1	GO:0000062(fatty-acyl-CoA binding);GO:0003995(acyl-CoA dehydrogenase activity);GO:0005739(mitochondrion);GO:0009055(electron transfer activity);GO:0033539(fatty acid beta-oxidation using acyl-CoA dehydrogenase);GO:0050660(flavin adenine dinucleotide binding);GO:0052890(oxidoreductase activity, acting on the CH-CH group of donors, with a flavin as acceptor);GO:0055088(lipid homeostasis)	COG1960(acyl-CoA dehydrogenase)	K00253	isovaleryl-CoA dehydrogenase	EC:1.3.8.4	yli00280(Valine, leucine and isoleucine degradation)	V2X593.1 PF02770.17;Acyl-CoA_dh_M;
TRINITY_DN10028_c0_g2	246	TRINITY_DN10028_c0_g2_i1	acyl- oxidase [Lentinula edodes]	Acadsb	Short/branched chain specific acyl-CoA dehydrogenase, mitochondrial OS=Mus musculus GN=Acadsb PE=1 SV=1	GO:0000062(fatty-acyl-CoA binding);GO:0003995(acyl-CoA dehydrogenase activity);GO:0005739(mitochondrion);GO:0009055(electron transfer activity);GO:0033539(fatty acid beta-oxidation using acyl-CoA dehydrogenase);GO:0050660(flavin adenine dinucleotide binding);GO:0052890(oxidoreductase activity, acting on the CH-CH group of donors, with a flavin as acceptor);GO:0055088(lipid homeostasis)	COG1960(acyl-CoA dehydrogenase)	-	-	-	-	V2X593.1 PF02771.14;Acyl-CoA_dh_N;
TRINITY_DN10029_c0_g1	225	TRINITY_DN10029_c0_g1_i1	-	-	-	-	-	-	-	-	-	-
TRINITY_DN10029_c0_g2	767	TRINITY_DN10029_c0_g2_i1	hypothetical protein P167DRAFT_534742 [Morchella conica CCBAS932]	-	-	GO:0005737(cytoplasm);GO:0008093(cytoskeletal adaptor activity);GO:0030507(spectrin binding)	COG0666(Ankyrin Repeat)	NA	NA	NA	NA(NA)	G9NBF3.1 PF05729.10;NACHT;
TRINITY_DN1002_c0_g1	217	TRINITY_DN1002_c0_g1_i1	transcription initiation factor IID TAF10 subunit [Lentinula edodes]	-	-	-	COG5162(TAF10 RNA polymerase II, TATA box binding protein (TBP)-associated factor)	K03134	transcription initiation factor TFIID subunit 10	-	abp03022(Basal transcription factors)	-
TRINITY_DN10030_c0_g1	784	TRINITY_DN10030_c0_g1_i1	hypothetical protein HMPREF1544_03718 [Mucor circinelloides f. circinelloides 1006PhL]	Stard10	PCTP-like protein OS=Mus musculus GN=Stard10 PE=1 SV=1	GO:0005215(transporter activity);GO:0005737(cytoplasm);GO:0005829(cytosol);GO:0005902(microvillus);GO:0005929(cilium);GO:0006869(lipid transport);GO:0008289(lipid binding);GO:0015914(phospholipid transport);GO:0016020(membrane);GO:0031514(motile cilium);GO:0032782(bile acid secretion);GO:0035360(positive regulation of peroxisome proliferator activated receptor signaling pathway);GO:0042995(cell p…	ENOG4110QPY(lipid transport)	-	-	-	-	A0A087WXR2.1 PF01852.17;START;
TRINITY_DN10031_c0_g1	1894	TRINITY_DN10031_c0_g1_i1;TRINITY_DN10031_c0_g1_i2	uridylate kinase [Morchella conica CCBAS932]	URA6	Uridylate kinase OS=Saccharomyces cerevisiae (strain ATCC 204508 / S288c) GN=URA6 PE=1 SV=1	GO:0004017(adenylate kinase activity);GO:0004127(cytidylate kinase activity);GO:0005524(ATP binding);GO:0005634(nucleus);GO:0005739(mitochondrion);GO:0005829(cytosol);GO:0006207('de novo' pyrimidine nucleobase biosynthetic process);GO:0006221(pyrimidine nucleotide biosynthetic process);GO:0009041(uridylate kinase activity);GO:0046939(nucleotide phosphorylation)	COG0563(Catalyzes the reversible transfer of the terminal phosphate group between ATP and AMP. Plays an important role in cellular energy homeostasis and in adenine nucleotide metabolism (By similarity))	K13800	UMP-CMP kinase	EC:2.7.4.14	tml00240(Pyrimidine metabolism)	A0A0A1P1M4.1 PF00406.20;ADK;
TRINITY_DN10033_c1_g1	678	TRINITY_DN10033_c1_g1_i1	alpha-amylase [Catenaria anguillulae PL171]	Amy2	Pancreatic alpha-amylase OS=Mus musculus GN=Amy2 PE=1 SV=2	GO:0004556(alpha-amylase activity);GO:0005975(carbohydrate metabolic process);GO:0043169(cation binding);GO:0103025(alpha-amylase activity (releasing maltohexaose))	COG0366(alpha amylase, catalytic)	-	-	-	-	A0A0G2K6T1.1 PF00128.22;Alpha-amylase;
TRINITY_DN10034_c0_g1	708	TRINITY_DN10034_c0_g1_i1	-	-	-	-	-	-	-	-	-	-
TRINITY_DN10035_c0_g1	1385	TRINITY_DN10035_c0_g1_i1	hypothetical protein FPSE_10082 [Fusarium pseudograminearum CS3096]	-	-	-	-	-	-	-	-	-
TRINITY_DN10036_c0_g1	328	TRINITY_DN10036_c0_g1_i1;TRINITY_DN10036_c0_g1_i2	-	-	-	-	-	-	-	-	-	-
TRINITY_DN10037_c0_g1	2341	TRINITY_DN10037_c0_g1_i1;TRINITY_DN10037_c0_g1_i2	translation initiation factor eIF-3b [Morchella conica CCBAS932]	prt1	Eukaryotic translation initiation factor 3 subunit B OS=Sclerotinia sclerotiorum (strain ATCC 18683 / 1980 / Ss-1) GN=prt1 PE=3 SV=1	GO:0003743(translation initiation factor activity);GO:0005852(eukaryotic translation initiation factor 3 complex)	COG5354(Component of the eukaryotic translation initiation factor 3 (eIF-3) complex, which is involved in protein synthesis and, together with other initiation factors, stimulates binding of mRNA and methionyl-tRNAi to the 40S ribosome (By similarity))	K03253	translation initiation factor 3 subunit B	-	tml03013(RNA transport)	D5GAY6.1 PF08662.9;eIF2A;
TRINITY_DN10037_c0_g2	285	TRINITY_DN10037_c0_g2_i1	-	-	-	-	-	-	-	-	-	-
TRINITY_DN10039_c0_g1	1020	TRINITY_DN10039_c0_g1_i1	hypothetical protein P167DRAFT_582458, partial [Morchella conica CCBAS932]	BRE4	Protein BRE4 OS=Saccharomyces cerevisiae (strain ATCC 204508 / S288c) GN=BRE4 PE=1 SV=1	GO:0005774(vacuolar membrane);GO:0015140(malate transmembrane transporter activity)	ENOG410XR8V(aluminum-activated malate transporter)	-	-	-	-	D5GGW7.1 PF10337.7;ArAE_2_N;
TRINITY_DN10039_c1_g1	231	TRINITY_DN10039_c1_g1_i1	-	-	-	-	-	-	-	-	-	-
TRINITY_DN1003_c0_g1	391	TRINITY_DN1003_c0_g1_i1	-	-	-	-	-	-	-	-	-	-
TRINITY_DN10040_c0_g1	1185	TRINITY_DN10040_c0_g1_i1	hypothetical protein P167DRAFT_565013 [Morchella conica CCBAS932]	SPAC144.05	Uncharacterized ATP-dependent helicase C144.05 OS=Schizosaccharomyces pombe (strain 972 / ATCC 24843) GN=SPAC144.05 PE=3 SV=1	GO:0003676(nucleic acid binding);GO:0003677(DNA binding);GO:0004386(helicase activity);GO:0005524(ATP binding);GO:0005634(nucleus);GO:0008150(biological_process);GO:0008270(zinc ion binding)	COG0553(helicase)	NA	NA	NA	NA(NA)	Q0CFV4.1 PF00271.29;Helicase_C;
TRINITY_DN10042_c0_g1	275	TRINITY_DN10042_c0_g1_i1	acetylornithine aminotransferase [Lentinula edodes]	ARG8	Acetylornithine aminotransferase, mitochondrial OS=Ashbya gossypii (strain ATCC 10895 / CBS 109.51 / FGSC 9923 / NRRL Y-1056) GN=ARG8 PE=3 SV=1	GO:0003992(N2-acetyl-L-ornithine:2-oxoglutarate 5-aminotransferase activity);GO:0005759(mitochondrial matrix);GO:0005829(cytosol);GO:0006526(arginine biosynthetic process);GO:0030170(pyridoxal phosphate binding);GO:0042802(identical protein binding)	COG4992(Acetylornithine aminotransferase)	K00818	acetylornithine aminotransferase	EC:2.6.1.11	mrr00220(Arginine biosynthesis)	V2XUJ7.1 PF00202.19;Aminotran_3;
TRINITY_DN10043_c0_g1	235	TRINITY_DN10043_c0_g1_i1	P-loop containing nucleoside triphosphate hydrolase protein [Morchella conica CCBAS932]	-	-	-	-	-	-	-	-	-
TRINITY_DN10043_c0_g2	713	TRINITY_DN10043_c0_g2_i1	P-loop containing nucleoside triphosphate hydrolase protein [Morchella conica CCBAS932]	pmd1	Leptomycin B resistance protein pmd1 OS=Schizosaccharomyces pombe (strain 972 / ATCC 24843) GN=pmd1 PE=3 SV=2	GO:0016021(integral component of membrane);GO:0042626(ATPase activity, coupled to transmembrane movement of substances);GO:0055085(transmembrane transport)	COG1132((ABC) transporter)	K05658	ATP-binding cassette, subfamily B (MDR/TAP), member 1	EC:3.6.3.44	ure02010(ABC transporters)	D5G846.1 PF00005.25;ABC_tran;
TRINITY_DN10044_c0_g1	468	TRINITY_DN10044_c0_g1_i1	hypothetical protein P167DRAFT_608060 [Morchella conica CCBAS932]	SPAC3H5.09c	UPF0648 protein C3H5.09c OS=Schizosaccharomyces pombe (strain 972 / ATCC 24843) GN=SPAC3H5.09c PE=3 SV=2	GO:0003674(molecular_function);GO:0005575(cellular_component);GO:0008150(biological_process)	ENOG410XSYR(UPF0378 protein)	-	-	-	-	-
TRINITY_DN10044_c0_g2	981	TRINITY_DN10044_c0_g2_i1	hypothetical protein P167DRAFT_608060 [Morchella conica CCBAS932]	SPAC3H5.09c	UPF0648 protein C3H5.09c OS=Schizosaccharomyces pombe (strain 972 / ATCC 24843) GN=SPAC3H5.09c PE=3 SV=2	GO:0003674(molecular_function);GO:0005575(cellular_component);GO:0008150(biological_process)	ENOG410XSYR(UPF0378 protein)	-	-	-	-	D5GHB1.1 PF10347.7;Fmp27_GFWDK;
TRINITY_DN10045_c0_g1	430	TRINITY_DN10045_c0_g1_i1	-	-	-	-	-	-	-	-	-	-
TRINITY_DN10045_c1_g1	624	TRINITY_DN10045_c1_g1_i1	hypothetical protein P167DRAFT_34153 [Morchella conica CCBAS932]	-	-	-	-	-	-	-	-	-
TRINITY_DN10046_c0_g1	431	TRINITY_DN10046_c0_g1_i1	-	-	-	-	-	-	-	-	-	-
TRINITY_DN10047_c0_g1	2409	TRINITY_DN10047_c0_g1_i1	hypothetical protein P167DRAFT_572107 [Morchella conica CCBAS932]	ARE2	Sterol O-acyltransferase 2 OS=Candida albicans GN=ARE2 PE=1 SV=1	GO:0005789(endoplasmic reticulum membrane);GO:0008204(ergosterol metabolic process);GO:0034737(ergosterol O-acyltransferase activity)	COG5056(Oacyltransferase)	K00637	sterol O-acyltransferase	EC:2.3.1.26	tml00100(Steroid biosynthesis)	A0A0E9NSB8.1 PF03062.17;MBOAT;
TRINITY_DN10048_c1_g1	355	TRINITY_DN10048_c1_g1_i1	-	-	-	-	-	-	-	-	-	-
TRINITY_DN10048_c1_g2	980	TRINITY_DN10048_c1_g2_i1	-	-	-	-	-	-	-	-	-	-
TRINITY_DN10048_c2_g1	201	TRINITY_DN10048_c2_g1_i1	-	-	-	-	-	-	-	-	-	-
TRINITY_DN10049_c0_g1	1576	TRINITY_DN10049_c0_g1_i1	hypothetical protein P167DRAFT_537043 [Morchella conica CCBAS932]	-	-	-	-	-	-	-	-	-
TRINITY_DN1004_c0_g1	1547	TRINITY_DN1004_c0_g1_i1	aldehyde dehydrogenase [Morchella conica CCBAS932]	vdh	Vanillin dehydrogenase OS=Pseudomonas sp. (strain HR199 / DSM 7063) GN=vdh PE=1 SV=1	GO:0019145(aminobutyraldehyde dehydrogenase activity);GO:0047105(4-trimethylammoniobutyraldehyde dehydrogenase activity)	COG1012(Dehydrogenase)	K00128	aldehyde dehydrogenase (NAD+)	EC:1.2.1.3	maw00010(Glycolysis / Gluconeogenesis);maw00053(Ascorbate and aldarate metabolism);maw00620(Pyruvate metabolism);maw00071(Fatty acid degradation);maw00561(Glycerolipid metabolism);maw00280(Valine, leucine and isoleucine degradation);maw00310(Lysine degradation);maw00330(Arginine and proline metabolism);maw00340(Histidine metabolism);maw00380(Tryptophan metabolism);maw00410(beta-Alanine metabolism)	U4KYY7.1 PF00171.20;Aldedh;
TRINITY_DN10051_c0_g1	295	TRINITY_DN10051_c0_g1_i1	ankyrin [Morchella conica CCBAS932]	-	-	-	-	-	-	-	-	-
TRINITY_DN10051_c0_g2	312	TRINITY_DN10051_c0_g2_i1	-	-	-	-	-	-	-	-	-	-
TRINITY_DN10051_c0_g3	695	TRINITY_DN10051_c0_g3_i1	ankyrin [Morchella conica CCBAS932]	-	-	-	-	-	-	-	-	-
TRINITY_DN10053_c0_g1	311	TRINITY_DN10053_c0_g1_i1	zinc-finger domain-domain-containing protein [Protomyces lactucaedebilis]	Ndufs6	NADH dehydrogenase [ubiquinone] iron-sulfur protein 6, mitochondrial OS=Mus musculus GN=Ndufs6 PE=1 SV=2	GO:0003674(molecular_function);GO:0005739(mitochondrion);GO:0005743(mitochondrial inner membrane);GO:0005747(mitochondrial respiratory chain complex I);GO:0006120(mitochondrial electron transport, NADH to ubiquinone);GO:0006631(fatty acid metabolic process);GO:0006936(muscle contraction);GO:0010259(multicellular organism aging);GO:0016020(membrane);GO:0022904(respiratory electron transport chain)…	ENOG4111W6X(electron transport chain)	K03939	NADH dehydrogenase (ubiquinone) Fe-S protein 6	-	wse00190(Oxidative phosphorylation)	A0A091E6T2.1 PF10276.7;zf-CHCC;
TRINITY_DN10055_c1_g1	603	TRINITY_DN10055_c1_g1_i1	S-adenosyl-L-methionine-dependent methyltransferase [Morchella conica CCBAS932]	MT3445	Uncharacterized methyltransferase MT3445 OS=Mycobacterium tuberculosis (strain CDC 1551 / Oshkosh) GN=MT3445 PE=3 SV=1	GO:0005575(cellular_component);GO:0008150(biological_process)	ENOG4111IQH(Methyltransferase)	K14300	nuclear pore complex protein Nup133	-	cci03013(RNA transport)	A0A0N0RS07.1 PF13489.4;Methyltransf_23;
TRINITY_DN10057_c0_g1	249	TRINITY_DN10057_c0_g1_i1	riboflavin synthase domain-like protein [Morchella conica CCBAS932]	tah18	NADPH-dependent diflavin oxidoreductase 1 OS=Emericella nidulans (strain FGSC A4 / ATCC 38163 / CBS 112.46 / NRRL 194 / M139) GN=tah18 PE=3 SV=3	GO:0005506(iron ion binding);GO:0005575(cellular_component);GO:0010181(FMN binding);GO:0016491(oxidoreductase activity);GO:0055114(oxidation-reduction process)	COG0369(Component of the sulfite reductase complex that catalyzes the 6-electron reduction of sulfite to sulfide. This is one of several activities required for the biosynthesis of L- cysteine from sulfate. The flavoprotein component catalyzes the electron flow from NADPH - FAD - FMN to the hemoprotein component (By similarity))	NA	NA	NA	NA(NA)	U4LUW9.1 PF00175.19;NAD_binding_1;
TRINITY_DN10057_c0_g2	1067	TRINITY_DN10057_c0_g2_i1	riboflavin synthase domain-like protein [Morchella conica CCBAS932]	tah18	NADPH-dependent diflavin oxidoreductase 1 OS=Emericella nidulans (strain FGSC A4 / ATCC 38163 / CBS 112.46 / NRRL 194 / M139) GN=tah18 PE=3 SV=3	GO:0005506(iron ion binding);GO:0005575(cellular_component);GO:0010181(FMN binding);GO:0016491(oxidoreductase activity);GO:0055114(oxidation-reduction process)	COG0369(Component of the sulfite reductase complex that catalyzes the 6-electron reduction of sulfite to sulfide. This is one of several activities required for the biosynthesis of L- cysteine from sulfate. The flavoprotein component catalyzes the electron flow from NADPH - FAD - FMN to the hemoprotein component (By similarity))	K14338	cytochrome P450 / NADPH-cytochrome P450 reductase	EC:1.14.14.1 1.6.2.4	npa00071(Fatty acid degradation);npa00380(Tryptophan metabolism)	U4LUW9.1 PF00667.18;FAD_binding_1;
TRINITY_DN10057_c0_g3	357	TRINITY_DN10057_c0_g3_i1	riboflavin synthase domain-like protein [Morchella conica CCBAS932]	tah18	NADPH-dependent diflavin oxidoreductase 1 OS=Emericella nidulans (strain FGSC A4 / ATCC 38163 / CBS 112.46 / NRRL 194 / M139) GN=tah18 PE=3 SV=3	GO:0005506(iron ion binding);GO:0005575(cellular_component);GO:0010181(FMN binding);GO:0016491(oxidoreductase activity);GO:0055114(oxidation-reduction process)	COG0369(Component of the sulfite reductase complex that catalyzes the 6-electron reduction of sulfite to sulfide. This is one of several activities required for the biosynthesis of L- cysteine from sulfate. The flavoprotein component catalyzes the electron flow from NADPH - FAD - FMN to the hemoprotein component (By similarity))	NA	NA	NA	NA(NA)	S8A608.1 PF00258.23;Flavodoxin_1;
TRINITY_DN10058_c0_g1	275	TRINITY_DN10058_c0_g1_i1	-	Eif4g1	Eukaryotic translation initiation factor 4 gamma 1 OS=Mus musculus GN=Eif4g1 PE=1 SV=1	GO:0001662(behavioral fear response);GO:0003723(RNA binding);GO:0003729(mRNA binding);GO:0003743(translation initiation factor activity);GO:0005515(protein binding);GO:0005524(ATP binding);GO:0005634(nucleus);GO:0005737(cytoplasm);GO:0005829(cytosol);GO:0005844(polysome);GO:0006412(translation);GO:0006413(translational initiation);GO:0006417(regulation of translation);GO:0006446(regulation of tra…	ENOG410XS4P(Eukaryotic translation initiation factor 4 gamma)	-	-	-	-	-
TRINITY_DN10058_c0_g2	390	TRINITY_DN10058_c0_g2_i1	-	Eif4g1	Eukaryotic translation initiation factor 4 gamma 1 OS=Mus musculus GN=Eif4g1 PE=1 SV=1	GO:0001662(behavioral fear response);GO:0003723(RNA binding);GO:0003729(mRNA binding);GO:0003743(translation initiation factor activity);GO:0005515(protein binding);GO:0005524(ATP binding);GO:0005634(nucleus);GO:0005737(cytoplasm);GO:0005829(cytosol);GO:0005844(polysome);GO:0006412(translation);GO:0006413(translational initiation);GO:0006417(regulation of translation);GO:0006446(regulation of tra…	ENOG410XS4P(Eukaryotic translation initiation factor 4 gamma)	-	-	-	-	-
TRINITY_DN1005_c0_g1	257	TRINITY_DN1005_c0_g1_i1	-	-	-	-	-	-	-	-	-	-
TRINITY_DN10060_c0_g1	277	TRINITY_DN10060_c0_g1_i1	-	-	-	-	-	-	-	-	-	-
TRINITY_DN10061_c0_g1	1003	TRINITY_DN10061_c0_g1_i1	-	-	-	-	-	-	-	-	-	-
TRINITY_DN10063_c1_g1	439	TRINITY_DN10063_c1_g1_i1	-	-	-	-	-	-	-	-	-	-
TRINITY_DN10065_c0_g1	659	TRINITY_DN10065_c0_g1_i1	-	-	-	-	-	-	-	-	-	-
TRINITY_DN10066_c0_g1	767	TRINITY_DN10066_c0_g1_i1	hypothetical protein BCR33DRAFT_721511 [Rhizoclosmatium globosum]	Kiaa0100	Protein KIAA0100 OS=Mus musculus GN=Kiaa0100 PE=1 SV=1	GO:0003674(molecular_function);GO:0005575(cellular_component);GO:0005576(extracellular region);GO:0008150(biological_process)	ENOG410XSYR(UPF0378 protein)	-	-	-	-	Q5SYL3.1 PF10351.7;Apt1;
TRINITY_DN10068_c0_g1	782	TRINITY_DN10068_c0_g1_i1	G10 protein [Morchella conica CCBAS932]	Os12g0149800	Protein BUD31 homolog 3 OS=Oryza sativa subsp. japonica GN=Os12g0149800 PE=2 SV=2	GO:0000282(cellular bud site selection);GO:0000398(mRNA splicing, via spliceosome);GO:0003674(molecular_function);GO:0005684(U2-type spliceosomal complex);GO:0005686(U2 snRNP);GO:0071014(post-mRNA release spliceosomal complex)	COG5132(BUD31 homolog)	K12873	bud site selection protein 31	-	tml03040(Spliceosome)	D5GDD3.1 PF01125.15;G10;
TRINITY_DN1006_c0_g1	444	TRINITY_DN1006_c0_g1_i1	hypothetical protein LENED_003944 [Lentinula edodes]	-	-	-	-	-	-	-	-	-
TRINITY_DN10071_c0_g1	817	TRINITY_DN10071_c0_g1_i1	hypothetical protein P167DRAFT_492377 [Morchella conica CCBAS932]	rsm24	37S ribosomal protein S24, mitochondrial OS=Schizosaccharomyces pombe (strain 972 / ATCC 24843) GN=rsm24 PE=3 SV=1	GO:0003735(structural constituent of ribosome);GO:0005763(mitochondrial small ribosomal subunit)	ENOG410ZX0Y((ribosomal) protein)	NA	NA	NA	NA(NA)	U7Q3Q6.1 PF10213.7;MRP-S28;
TRINITY_DN10072_c0_g1	3164	TRINITY_DN10072_c0_g1_i1	P-loop containing nucleoside triphosphate hydrolase protein [Morchella conica CCBAS932]	AQR	Intron-binding protein aquarius OS=Homo sapiens GN=AQR PE=1 SV=4	GO:0000398(mRNA splicing, via spliceosome);GO:0005681(spliceosomal complex);GO:0097157(pre-mRNA intronic binding)	ENOG410XPV8(Aquarius homolog (Mouse))	K12874	intron-binding protein aquarius	-	tml03040(Spliceosome)	D5G6F0.1 PF16399.3;Aquarius_N;
TRINITY_DN10073_c0_g1	1553	TRINITY_DN10073_c0_g1_i1;TRINITY_DN10073_c0_g1_i2	hypothetical protein P167DRAFT_496305 [Morchella conica CCBAS932]	SPAC30C2.08	UPF0662 protein C30C2.08 OS=Schizosaccharomyces pombe (strain 972 / ATCC 24843) GN=SPAC30C2.08 PE=3 SV=1	GO:0003674(molecular_function);GO:0005634(nucleus);GO:0005829(cytosol);GO:0008150(biological_process)	ENOG410YSRR(Conserved hypothetical, protein)	-	-	-	-	D5G422.1 PF10303.7;DUF2408;
TRINITY_DN10075_c0_g1	755	TRINITY_DN10075_c0_g1_i1	-	-	-	-	-	-	-	-	-	-
TRINITY_DN10077_c0_g1	400	TRINITY_DN10077_c0_g1_i1	hypothetical protein P167DRAFT_537149 [Morchella conica CCBAS932]	-	-	-	ENOG410XQ7W(ubiquitin-conjugating enzyme)	K10581	ubiquitin-conjugating enzyme E2 O	EC:2.3.2.24	tml04120(Ubiquitin mediated proteolysis)	-
TRINITY_DN10077_c0_g2	1920	TRINITY_DN10077_c0_g2_i1	hypothetical protein P167DRAFT_537149 [Morchella conica CCBAS932]	-	-	GO:0005737(cytoplasm);GO:0019788(NEDD8 transferase activity);GO:0031625(ubiquitin protein ligase binding);GO:0045116(protein neddylation);GO:0061630(ubiquitin protein ligase activity)	ENOG410XQ7W(ubiquitin-conjugating enzyme)	K10581	ubiquitin-conjugating enzyme E2 O	EC:2.3.2.24	tml04120(Ubiquitin mediated proteolysis)	-
TRINITY_DN10079_c0_g1	859	TRINITY_DN10079_c0_g1_i1	GPI-anchored small secreted protein [Lentinula edodes]	-	-	-	-	-	-	-	-	-
TRINITY_DN10081_c0_g1	3505	TRINITY_DN10081_c0_g1_i1	hypothetical protein P167DRAFT_294150 [Morchella conica CCBAS932]	sec8	Probable exocyst complex component sec8 OS=Neurospora crassa (strain ATCC 24698 / 74-OR23-1A / CBS 708.71 / DSM 1257 / FGSC 987) GN=sec8 PE=3 SV=1	GO:0003674(molecular_function)	ENOG410Z8N0(Exocyst complex component)	NA	NA	NA	NA(NA)	D5G5E1.1 PF04048.12;Sec8_exocyst;
TRINITY_DN10083_c0_g1	2247	TRINITY_DN10083_c0_g1_i1	-	Ankrd23	Ankyrin repeat domain-containing protein 23 OS=Mus musculus GN=Ankrd23 PE=2 SV=1	GO:0003674(molecular_function);GO:0005634(nucleus);GO:0005654(nucleoplasm);GO:0005829(cytosol);GO:0006631(fatty acid metabolic process);GO:0009612(response to mechanical stimulus);GO:0014704(intercalated disc);GO:0015629(actin cytoskeleton);GO:0030016(myofibril);GO:0031432(titin binding);GO:0031674(I band);GO:0035994(response to muscle stretch);GO:0060297(regulation of sarcomere organization)	COG0666(Ankyrin Repeat)	-	-	-	-	L5KV08.1 PF12796.5;Ank_2;
TRINITY_DN10084_c0_g1	403	TRINITY_DN10084_c0_g1_i1	-	-	-	-	-	-	-	-	-	-
TRINITY_DN10084_c0_g2	777	TRINITY_DN10084_c0_g2_i1	hypothetical protein P167DRAFT_567137 [Morchella conica CCBAS932]	-	-	-	-	-	-	-	-	-
TRINITY_DN10087_c0_g1	1013	TRINITY_DN10087_c0_g1_i1	60S ribosomal protein L15 [Morchella conica CCBAS932]	rpl-15	60S ribosomal protein L15 OS=Neurospora crassa (strain ATCC 24698 / 74-OR23-1A / CBS 708.71 / DSM 1257 / FGSC 987) GN=rpl-15 PE=3 SV=1	NA(NA)	COG1632(Ribosomal protein L15)	K02877	large subunit ribosomal protein L15e	-	tml03010(Ribosome)	A0A074YUK1.1 PF00827.15;Ribosomal_L15e;
TRINITY_DN10088_c0_g1	666	TRINITY_DN10088_c0_g1_i1	-	-	-	-	-	-	-	-	-	-
TRINITY_DN10089_c0_g1	479	TRINITY_DN10089_c0_g1_i1;TRINITY_DN10089_c0_g1_i2	acylphosphatase [Morchella conica CCBAS932]	acyP	Acylphosphatase OS=Methylococcus capsulatus (strain ATCC 33009 / NCIMB 11132 / Bath) GN=acyP PE=3 SV=1	GO:0003998(acylphosphatase activity)	ENOG41126ER(acylphosphatase)	K01512	acylphosphatase	EC:3.6.1.7	glz00620(Pyruvate metabolism)	S3CRQ0.1 PF00708.16;Acylphosphatase;
TRINITY_DN10089_c0_g2	1667	TRINITY_DN10089_c0_g2_i1	alternative oxidase [Morchella conica CCBAS932]	AOX1	Alternative oxidase, mitochondrial OS=Ajellomyces capsulatus GN=AOX1 PE=2 SV=1	GO:0005739(mitochondrion);GO:0005886(plasma membrane);GO:0009916(alternative oxidase activity);GO:0010230(alternative respiration);GO:0034599(cellular response to oxidative stress);GO:0045333(cellular respiration)	ENOG410YFEH(alternative oxidase)	-	-	-	-	D5GFD1.1 PF01786.15;AOX;
TRINITY_DN10090_c0_g1	349	TRINITY_DN10090_c0_g1_i1	-	-	-	-	-	-	-	-	-	-
TRINITY_DN10090_c0_g2	264	TRINITY_DN10090_c0_g2_i1	hypothetical protein Glove_152g39 [Diversispora versiformis]	Srpra	Signal recognition particle receptor subunit alpha OS=Mus musculus GN=Srpra PE=1 SV=1	GO:0000166(nucleotide binding);GO:0003924(GTPase activity);GO:0005047(signal recognition particle binding);GO:0005525(GTP binding);GO:0005783(endoplasmic reticulum);GO:0005785(signal recognition particle receptor complex);GO:0005789(endoplasmic reticulum membrane);GO:0006614(SRP-dependent cotranslational protein targeting to membrane);GO:0006886(intracellular protein transport);GO:0016020(membran…	COG0552(Involved in targeting and insertion of nascent membrane proteins into the cytoplasmic membrane. Acts as a receptor for the complex formed by the signal recognition particle (SRP) and the ribosome-nascent chain (RNC))	K13431	signal recognition particle receptor subunit alpha	-	mlr03060(Protein export)	F6YPN2.1 PF00448.20;SRP54;
TRINITY_DN10090_c0_g3	528	TRINITY_DN10090_c0_g3_i1	SRP54-domain-containing protein [Anaeromyces robustus]	SRPRA	Signal recognition particle receptor subunit alpha OS=Bos taurus GN=SRPRA PE=2 SV=1	GO:0003924(GTPase activity);GO:0005047(signal recognition particle binding);GO:0005525(GTP binding);GO:0005785(signal recognition particle receptor complex);GO:0006614(SRP-dependent cotranslational protein targeting to membrane)	COG0552(Involved in targeting and insertion of nascent membrane proteins into the cytoplasmic membrane. Acts as a receptor for the complex formed by the signal recognition particle (SRP) and the ribosome-nascent chain (RNC))	K13431	signal recognition particle receptor subunit alpha	-	tms03060(Protein export)	F6YPN2.1 PF00448.20;SRP54;
TRINITY_DN10091_c0_g1	252	TRINITY_DN10091_c0_g1_i1	PLP-dependent transferase [Morchella conica CCBAS932]	hxB	Molybdenum cofactor sulfurase OS=Emericella nidulans (strain FGSC A4 / ATCC 38163 / CBS 112.46 / NRRL 194 / M139) GN=hxB PE=2 SV=2	GO:0003824(catalytic activity);GO:0005575(cellular_component);GO:0006145(purine nucleobase catabolic process);GO:0030151(molybdenum ion binding);GO:0030170(pyridoxal phosphate binding)	COG0520(cysteine desulfurase);COG3217(MOSC domain-containing protein)	K15631	molybdenum cofactor sulfurtransferase	EC:2.8.1.9	tml00790(Folate biosynthesis)	D5G5P1.1 PF00266.17;Aminotran_5;
TRINITY_DN10091_c0_g2	1766	TRINITY_DN10091_c0_g2_i1	PLP-dependent transferase [Morchella conica CCBAS932]	hxB	Molybdenum cofactor sulfurase OS=Botryotinia fuckeliana (strain B05.10) GN=hxB PE=3 SV=1	GO:0003824(catalytic activity);GO:0005575(cellular_component);GO:0006145(purine nucleobase catabolic process);GO:0030151(molybdenum ion binding);GO:0030170(pyridoxal phosphate binding)	COG0520(cysteine desulfurase);COG3217(MOSC domain-containing protein)	K15631	molybdenum cofactor sulfurtransferase	EC:2.8.1.9	tml00790(Folate biosynthesis)	D5G5P1.1 PF00266.17;Aminotran_5;
TRINITY_DN10092_c0_g1	376	TRINITY_DN10092_c0_g1_i1	thioredoxin [Lentinula edodes]	-	Thioredoxin OS=Coprinus comatus PE=1 SV=1	GO:0005622(intracellular);GO:0006662(glycerol ether metabolic process);GO:0009055(electron transfer activity);GO:0015035(protein disulfide oxidoreductase activity);GO:0019863(IgE binding);GO:0045454(cell redox homeostasis)	COG0526(Thioredoxin)	NA	NA	NA	NA(NA)	S8C1T5.1 PF00085.18;Thioredoxin;
TRINITY_DN10093_c0_g1	352	TRINITY_DN10093_c0_g1_i1	-	-	-	-	-	-	-	-	-	-
TRINITY_DN10094_c0_g1	288	TRINITY_DN10094_c0_g1_i1	hypothetical protein P167DRAFT_531050 [Morchella conica CCBAS932]	-	-	-	-	-	-	-	-	-
TRINITY_DN10096_c0_g1	226	TRINITY_DN10096_c0_g1_i1	hypothetical protein P167DRAFT_293962 [Morchella conica CCBAS932]	-	-	-	-	-	-	-	-	-
TRINITY_DN10096_c0_g2	232	TRINITY_DN10096_c0_g2_i1	hypothetical protein P167DRAFT_293962 [Morchella conica CCBAS932]	-	-	-	-	-	-	-	-	-
TRINITY_DN10097_c0_g1	926	TRINITY_DN10097_c0_g1_i1	glycoside hydrolase family 3 protein [Morchella conica CCBAS932]	bglX	Periplasmic beta-glucosidase OS=Salmonella typhimurium (strain LT2 / SGSC1412 / ATCC 700720) GN=bglX PE=3 SV=2	GO:0008422(beta-glucosidase activity);GO:0009251(glucan catabolic process)	COG1472(hydrolase family 3)	K05349	beta-glucosidase	EC:3.2.1.21	pco00500(Starch and sucrose metabolism);pco00460(Cyanoamino acid metabolism)	A0A0F9ZTK2.1 PF01915.20;Glyco_hydro_3_C;
TRINITY_DN10098_c0_g1	742	TRINITY_DN10098_c0_g1_i1;TRINITY_DN10098_c0_g1_i2;TRINITY_DN10098_c0_g1_i3;TRINITY_DN10098_c0_g1_i4	-	-	-	-	-	-	-	-	-	-
TRINITY_DN10099_c0_g1	585	TRINITY_DN10099_c0_g1_i1	-	-	-	-	-	-	-	-	-	-
TRINITY_DN10099_c0_g2	405	TRINITY_DN10099_c0_g2_i1	-	-	-	-	-	-	-	-	-	-
TRINITY_DN1009_c0_g1	1287	TRINITY_DN1009_c0_g1_i1	-	Ahsg	Alpha-2-HS-glycoprotein OS=Mus musculus GN=Ahsg PE=1 SV=1	GO:0001503(ossification);GO:0004866(endopeptidase inhibitor activity);GO:0004869(cysteine-type endopeptidase inhibitor activity);GO:0005576(extracellular region);GO:0005615(extracellular space);GO:0005794(Golgi apparatus);GO:0006953(acute-phase response);GO:0008584(male gonad development);GO:0010951(negative regulation of endopeptidase activity);GO:0030294(receptor signaling protein tyrosine kina…	ENOG4111RIP(Alpha-2-HS-glycoprotein)	-	-	-	-	P29699.1 PF00031.19;Cystatin;
TRINITY_DN10100_c0_g1	441	TRINITY_DN10100_c0_g1_i1	-	-	-	-	-	-	-	-	-	-
TRINITY_DN10101_c0_g1	676	TRINITY_DN10101_c0_g1_i1	hypothetical protein P167DRAFT_538066 [Morchella conica CCBAS932]	-	-	-	-	-	-	-	-	-
TRINITY_DN10102_c0_g1	400	TRINITY_DN10102_c0_g1_i1	-	-	-	-	-	-	-	-	-	-
TRINITY_DN10103_c0_g1	3022	TRINITY_DN10103_c0_g1_i1;TRINITY_DN10103_c0_g1_i2	-	-	-	-	-	-	-	-	-	-
TRINITY_DN10104_c0_g1	209	TRINITY_DN10104_c0_g1_i1	-	-	-	-	-	-	-	-	-	-
TRINITY_DN10104_c0_g2	4013	TRINITY_DN10104_c0_g2_i1;TRINITY_DN10104_c0_g2_i2;TRINITY_DN10104_c0_g2_i3	hypothetical protein P167DRAFT_490151 [Morchella conica CCBAS932]	EVI5	Ecotropic viral integration site 5 protein homolog OS=Homo sapiens GN=EVI5 PE=1 SV=3	GO:0005096(GTPase activator activity);GO:0005622(intracellular);GO:0006886(intracellular protein transport);GO:0012505(endomembrane system);GO:0017137(Rab GTPase binding);GO:0031338(regulation of vesicle fusion);GO:0090630(activation of GTPase activity)	ENOG410YWJY(ecotropic viral integration site)	NA	NA	NA	NA(NA)	D5GF27.1 PF00566.16;RabGAP-TBC;
TRINITY_DN10106_c0_g1	369	TRINITY_DN10106_c0_g1_i1	-	-	-	-	-	-	-	-	-	-
TRINITY_DN10109_c0_g1	1594	TRINITY_DN10109_c0_g1_i1	aldehyde dehydrogenase [Lentinula edodes]	aldA	Aldehyde dehydrogenase OS=Agaricus bisporus GN=aldA PE=3 SV=1	GO:0019145(aminobutyraldehyde dehydrogenase activity);GO:0047105(4-trimethylammoniobutyraldehyde dehydrogenase activity)	COG1012(Dehydrogenase)	K00128	aldehyde dehydrogenase (NAD+)	EC:1.2.1.3	mrr00010(Glycolysis / Gluconeogenesis);mrr00053(Ascorbate and aldarate metabolism);mrr00620(Pyruvate metabolism);mrr00071(Fatty acid degradation);mrr00561(Glycerolipid metabolism);mrr00280(Valine, leucine and isoleucine degradation);mrr00310(Lysine degradation);mrr00330(Arginine and proline metabolism);mrr00340(Histidine metabolism);mrr00380(Tryptophan metabolism);mrr00410(beta-Alanine metabolism)	A8NLH7.1 PF00171.20;Aldedh;
TRINITY_DN10109_c0_g2	1637	TRINITY_DN10109_c0_g2_i1	aldehyde dehydrogenase [Lentinula edodes]	aldA	Aldehyde dehydrogenase OS=Agaricus bisporus GN=aldA PE=3 SV=1	GO:0019145(aminobutyraldehyde dehydrogenase activity);GO:0047105(4-trimethylammoniobutyraldehyde dehydrogenase activity)	COG1012(Dehydrogenase)	K00128	aldehyde dehydrogenase (NAD+)	EC:1.2.1.3	mrr00010(Glycolysis / Gluconeogenesis);mrr00053(Ascorbate and aldarate metabolism);mrr00620(Pyruvate metabolism);mrr00071(Fatty acid degradation);mrr00561(Glycerolipid metabolism);mrr00280(Valine, leucine and isoleucine degradation);mrr00310(Lysine degradation);mrr00330(Arginine and proline metabolism);mrr00340(Histidine metabolism);mrr00380(Tryptophan metabolism);mrr00410(beta-Alanine metabolism)	A8NLH7.1 PF00171.20;Aldedh;
TRINITY_DN1010_c0_g1	546	TRINITY_DN1010_c0_g1_i1	-	MLO6	MLO-like protein 6 OS=Arabidopsis thaliana GN=MLO6 PE=2 SV=2	GO:0005886(plasma membrane);GO:0006952(defense response)	-	-	-	-	-	A0A0A0KRN4.1 PF03094.13;Mlo;
TRINITY_DN10110_c0_g1	210	TRINITY_DN10110_c0_g1_i1	-	TRIM29	Tripartite motif-containing protein 29 OS=Homo sapiens GN=TRIM29 PE=1 SV=2	GO:0000122(negative regulation of transcription by RNA polymerase II);GO:0002039(p53 binding);GO:0003700(DNA binding transcription factor activity);GO:0005515(protein binding);GO:0005654(nucleoplasm);GO:0005737(cytoplasm);GO:0006366(transcription by RNA polymerase II);GO:0008270(zinc ion binding);GO:0045111(intermediate filament cytoskeleton);GO:1900181(negative regulation of protein localization…	ENOG410YEFV(tripartite motif containing 29)	-	-	-	-	-
TRINITY_DN10111_c0_g2	1044	TRINITY_DN10111_c0_g2_i1;TRINITY_DN10111_c0_g2_i2	-	-	-	-	-	-	-	-	-	-
TRINITY_DN10111_c0_g3	573	TRINITY_DN10111_c0_g3_i1	putative nadp-dependent malic enzyme [Erysiphe necator]	Me1	NADP-dependent malic enzyme OS=Mus musculus GN=Me1 PE=1 SV=2	GO:0004470(malic enzyme activity);GO:0004471(malate dehydrogenase (decarboxylating) (NAD+) activity);GO:0004473(malate dehydrogenase (decarboxylating) (NADP+) activity);GO:0005515(protein binding);GO:0005737(cytoplasm);GO:0005739(mitochondrion);GO:0005829(cytosol);GO:0006090(pyruvate metabolic process);GO:0006108(malate metabolic process);GO:0008948(oxaloacetate decarboxylase activity);GO:0009725…	COG0281(malic enzyme)	K00029	malate dehydrogenase (oxaloacetate-decarboxylating)(NADP+)	EC:1.1.1.40	hir00620(Pyruvate metabolism)	I3LYB9.1 PF03949.13;Malic_M;
TRINITY_DN10112_c0_g1	434	TRINITY_DN10112_c0_g1_i1	-	-	-	-	-	-	-	-	-	-
TRINITY_DN10112_c0_g2	1965	TRINITY_DN10112_c0_g2_i1	hypothetical protein P167DRAFT_534502 [Morchella conica CCBAS932]	OLE1	Acyl-CoA desaturase OS=Ajellomyces capsulatus GN=OLE1 PE=1 SV=1	GO:0001410(chlamydospore formation);GO:0004768(stearoyl-CoA 9-desaturase activity);GO:0005783(endoplasmic reticulum);GO:0006636(unsaturated fatty acid biosynthetic process);GO:0009267(cellular response to starvation);GO:0020037(heme binding);GO:0036170(filamentous growth of a population of unicellular organisms in response to starvation);GO:0036178(filamentous growth of a population of unicellula…	COG1398(desaturase);COG5274(cytochrome b5)	K00507	stearoyl-CoA desaturase (Delta-9 desaturase)	EC:1.14.19.1	tml01040(Biosynthesis of unsaturated fatty acids)	B8M3X2.1 PF00487.22;FA_desaturase;
TRINITY_DN10114_c0_g1	2164	TRINITY_DN10114_c0_g1_i1;TRINITY_DN10114_c0_g1_i2	acyl-CoA synthetase/AMP-acid ligase-like protein II [Morchella conica CCBAS932]	yngI	Putative acyl-CoA synthetase YngI OS=Bacillus subtilis (strain 168) GN=yngI PE=3 SV=1	GO:0005575(cellular_component)	COG0318(Amp-dependent synthetase and ligase)	NA	NA	NA	NA(NA)	M2VBM1.1 PF00501.26;AMP-binding;
TRINITY_DN10115_c0_g1	255	TRINITY_DN10115_c0_g1_i1	-	Ddrgk1	DDRGK domain-containing protein 1 OS=Mus musculus GN=Ddrgk1 PE=1 SV=2	GO:0001103(RNA polymerase II repressing transcription factor binding);GO:0005515(protein binding);GO:0005730(nucleolus);GO:0005783(endoplasmic reticulum);GO:0005789(endoplasmic reticulum membrane);GO:0008284(positive regulation of cell proliferation);GO:0010628(positive regulation of gene expression);GO:0010629(negative regulation of gene expression);GO:0030335(positive regulation of cell migrati…	ENOG4111IPW(DDRGK domain containing 1)	-	-	-	-	-
TRINITY_DN10115_c0_g2	207	TRINITY_DN10115_c0_g2_i1	-	Ddrgk1	DDRGK domain-containing protein 1 OS=Mus musculus GN=Ddrgk1 PE=1 SV=2	GO:0001103(RNA polymerase II repressing transcription factor binding);GO:0005515(protein binding);GO:0005730(nucleolus);GO:0005783(endoplasmic reticulum);GO:0005789(endoplasmic reticulum membrane);GO:0008284(positive regulation of cell proliferation);GO:0010628(positive regulation of gene expression);GO:0010629(negative regulation of gene expression);GO:0030335(positive regulation of cell migrati…	ENOG4111IPW(DDRGK domain containing 1)	-	-	-	-	G3H437.1 PF09756.7;DDRGK;
TRINITY_DN10118_c0_g1	471	TRINITY_DN10118_c0_g1_i1	hypothetical protein P167DRAFT_574250 [Morchella conica CCBAS932]	-	-	-	-	-	-	-	-	-
TRINITY_DN10119_c0_g1	248	TRINITY_DN10119_c0_g1_i1	-	Fhl3	Four and a half LIM domains protein 3 OS=Mus musculus GN=Fhl3 PE=1 SV=2	GO:0001725(stress fiber);GO:0003712(transcription cofactor activity);GO:0003779(actin binding);GO:0005515(protein binding);GO:0005634(nucleus);GO:0030018(Z disc);GO:0030036(actin cytoskeleton organization);GO:0046872(metal ion binding)	ENOG410XP0W(Prickle homolog)	-	-	-	-	G1T3C3.2 PF00412.20;LIM;
TRINITY_DN10120_c0_g1	367	TRINITY_DN10120_c0_g1_i1	pali-domain-containing protein [Lentinula edodes]	-	-	-	ENOG410Z602(SUR7/PalI family)	-	-	-	-	A0A060SC35.1 PF06687.10;SUR7;
TRINITY_DN10120_c0_g2	447	TRINITY_DN10120_c0_g2_i1	hypothetical protein GYMLUDRAFT_39402 [Gymnopus luxurians FD-317 M1]	-	-	-	ENOG410Z602(SUR7/PalI family)	-	-	-	-	V2XBZ5.1 PF06687.10;SUR7;
TRINITY_DN10121_c0_g1	332	TRINITY_DN10121_c0_g1_i1	-	ABI1	Protein phosphatase 2C 56 OS=Arabidopsis thaliana GN=ABI1 PE=1 SV=2	GO:0004721(phosphoprotein phosphatase activity);GO:0004722(protein serine/threonine phosphatase activity);GO:0005509(calcium ion binding);GO:0005515(protein binding);GO:0005634(nucleus);GO:0005737(cytoplasm);GO:0005886(plasma membrane);GO:0006470(protein dephosphorylation);GO:0008287(protein serine/threonine phosphatase complex);GO:0009408(response to heat);GO:0009409(response to cold);GO:0009737…	COG0631(Phosphatase)	-	-	-	-	A0A0A0M1Q8.1 PF00481.19;PP2C;
TRINITY_DN10124_c0_g1	3085	TRINITY_DN10124_c0_g1_i1;TRINITY_DN10124_c0_g1_i2	hypothetical protein P167DRAFT_571148 [Morchella conica CCBAS932]	rad4	S-M checkpoint control protein rad4 OS=Schizosaccharomyces pombe (strain 972 / ATCC 24843) GN=rad4 PE=1 SV=2	GO:0000790(nuclear chromatin);GO:0005829(cytosol);GO:0007095(mitotic G2 DNA damage checkpoint);GO:0031261(DNA replication preinitiation complex);GO:0031297(replication fork processing);GO:0033314(mitotic DNA replication checkpoint);GO:0035861(site of double-strand break);GO:0044732(mitotic spindle pole body);GO:0072686(mitotic spindle);GO:1902977(mitotic DNA replication preinitiation complex asse…	ENOG410XPFH(Topoisomerase (DNA) II binding protein 1)	NA	NA	NA	NA(NA)	D5GH36.1 PF12738.5;PTCB-BRCT;
TRINITY_DN10125_c0_g1	1494	TRINITY_DN10125_c0_g1_i1	phosphoribosyl pyrophosphokinase [Morchella conica CCBAS932]	PRS2	Ribose-phosphate pyrophosphokinase 2 OS=Saccharomyces cerevisiae (strain ATCC 204508 / S288c) GN=PRS2 PE=1 SV=1	GO:0000287(magnesium ion binding);GO:0000910(cytokinesis);GO:0002189(ribose phosphate diphosphokinase complex);GO:0004749(ribose phosphate diphosphokinase activity);GO:0005829(cytosol);GO:0006015(5-phosphoribose 1-diphosphate biosynthetic process);GO:0009116(nucleoside metabolic process);GO:0009165(nucleotide biosynthetic process);GO:0031505(fungal-type cell wall organization)	COG0462(Phosphoribosyl pyrophosphate synthase)	K00948	ribose-phosphate pyrophosphokinase	EC:2.7.6.1	tml00030(Pentose phosphate pathway);tml00230(Purine metabolism)	D5GBI5.1 PF13793.4;Pribosyltran_N;
TRINITY_DN10126_c0_g1	253	TRINITY_DN10126_c0_g1_i1	-	MRFAP1	MORF4 family-associated protein 1 OS=Homo sapiens GN=MRFAP1 PE=1 SV=1	GO:0005515(protein binding);GO:0005634(nucleus);GO:0048471(perinuclear region of cytoplasm)	ENOG4111AYE(Morf4 family associated protein 1)	-	-	-	-	G1RM71.1 PF15155.4;MRFAP1;
TRINITY_DN10127_c0_g1	558	TRINITY_DN10127_c0_g1_i1	E set domain-containing protein [Rhizoclosmatium globosum]	Arhgdib	Rho GDP-dissociation inhibitor 2 OS=Mus musculus GN=Arhgdib PE=1 SV=3	GO:0003924(GTPase activity);GO:0005094(Rho GDP-dissociation inhibitor activity);GO:0005096(GTPase activator activity);GO:0005737(cytoplasm);GO:0005829(cytosol);GO:0016020(membrane);GO:0035023(regulation of Rho protein signal transduction);GO:0048365(Rac GTPase binding);GO:1901164(negative regulation of trophoblast cell migration);GO:2000249(regulation of actin cytoskeleton reorganization)	ENOG4111K44(Rho GDP dissociation inhibitor (GDI))	NA	NA	NA	NA(NA)	A0A091DWR1.1 PF02115.15;Rho_GDI;
TRINITY_DN10129_c0_g1	357	TRINITY_DN10129_c0_g1_i1	arginine decarboxylase [Gonapodya prolifera JEL478]	SPE1	Arginine decarboxylase 1 OS=Arabidopsis thaliana GN=SPE1 PE=2 SV=1	GO:0008792(arginine decarboxylase activity);GO:0033388(putrescine biosynthetic process from arginine)	COG1166(Catalyzes the biosynthesis of agmatine from arginine (By similarity))	-	-	-	-	A0A0A0LPF5.1 PF00278.20;Orn_DAP_Arg_deC;
TRINITY_DN10129_c0_g2	330	TRINITY_DN10129_c0_g2_i1	-	-	Arginine decarboxylase OS=Pisum sativum PE=2 SV=1	GO:0008792(arginine decarboxylase activity);GO:0033388(putrescine biosynthetic process from arginine)	COG1166(Catalyzes the biosynthesis of agmatine from arginine (By similarity))	-	-	-	-	F6I184.1 PF00278.20;Orn_DAP_Arg_deC;
TRINITY_DN10129_c0_g3	208	TRINITY_DN10129_c0_g3_i1	-	-	Arginine decarboxylase OS=Glycine max PE=2 SV=1	GO:0008792(arginine decarboxylase activity);GO:0033388(putrescine biosynthetic process from arginine)	COG1166(Catalyzes the biosynthesis of agmatine from arginine (By similarity))	-	-	-	-	M7YZR5.1 PF00278.20;Orn_DAP_Arg_deC;
TRINITY_DN1012_c0_g1	252	TRINITY_DN1012_c0_g1_i1	-	-	-	-	-	-	-	-	-	-
TRINITY_DN10130_c0_g1	267	TRINITY_DN10130_c0_g1_i1	-	Ehbp1l1	EH domain-binding protein 1-like protein 1 OS=Mus musculus GN=Ehbp1l1 PE=1 SV=1	GO:0003674(molecular_function);GO:0005575(cellular_component);GO:0005768(endosome);GO:0008150(biological_process)	COG5069(Microtubule associated monoxygenase, calponin and LIM domain containing)	-	-	-	-	L9KQR4.1 PF00307.29;CH;
TRINITY_DN10132_c0_g1	281	TRINITY_DN10132_c0_g1_i1	hypothetical protein LENED_001054 [Lentinula edodes]	-	-	-	-	-	-	-	-	-
TRINITY_DN10133_c0_g1	723	TRINITY_DN10133_c0_g1_i1	protein vip1 [Lentinula edodes]	vip1	Protein vip1 OS=Schizosaccharomyces pombe (strain 972 / ATCC 24843) GN=vip1 PE=1 SV=1	GO:0000166(nucleotide binding);GO:0003676(nucleic acid binding);GO:0005739(mitochondrion);GO:0005829(cytosol);GO:0008150(biological_process)	ENOG4111ICI(actin cytoskeleton protein)	-	-	-	-	V2XEJ8.1 PF00076.20;RRM_1;
TRINITY_DN10135_c0_g1	239	TRINITY_DN10135_c0_g1_i1	succinate-semialdehyde dehydrogenase [Lentinula edodes]	ALDH7B4	Aldehyde dehydrogenase family 7 member B4 OS=Arabidopsis thaliana GN=ALDH7B4 PE=2 SV=3	GO:0004029(aldehyde dehydrogenase (NAD) activity)	COG1012(Dehydrogenase)	K14085	aldehyde dehydrogenase family 7 member A1	EC:1.2.1.31 1.2.1.8 1.2.1.3	abp00010(Glycolysis / Gluconeogenesis);abp00053(Ascorbate and aldarate metabolism);abp00620(Pyruvate metabolism);abp00071(Fatty acid degradation);abp00561(Glycerolipid metabolism);abp00260(Glycine, serine and threonine metabolism);abp00280(Valine, leucine and isoleucine degradation);abp00310(Lysine degradation);abp00330(Arginine and proline metabolism);abp00340(Histidine metabolism);abp00380(Tryp…	V2XGR1.1 PF00171.20;Aldedh;
TRINITY_DN10135_c0_g2	238	TRINITY_DN10135_c0_g2_i1	succinate-semialdehyde dehydrogenase [Lentinula edodes]	-	-	-	COG1012(Dehydrogenase)	K14085	aldehyde dehydrogenase family 7 member A1	EC:1.2.1.31 1.2.1.8 1.2.1.3	mpr00010(Glycolysis / Gluconeogenesis);mpr00053(Ascorbate and aldarate metabolism);mpr00620(Pyruvate metabolism);mpr00071(Fatty acid degradation);mpr00561(Glycerolipid metabolism);mpr00260(Glycine, serine and threonine metabolism);mpr00280(Valine, leucine and isoleucine degradation);mpr00310(Lysine degradation);mpr00330(Arginine and proline metabolism);mpr00340(Histidine metabolism);mpr00380(Tryp…	E2LL86.1 PF00171.20;Aldedh;
TRINITY_DN10136_c0_g1	509	TRINITY_DN10136_c0_g1_i1;TRINITY_DN10136_c0_g1_i2	SET domain-containing protein [Morchella conica CCBAS932]	-	-	GO:0000790(nuclear chromatin);GO:0003713(transcription coactivator activity);GO:0010452(histone H3-K36 methylation);GO:0018023(peptidyl-lysine trimethylation);GO:0018026(peptidyl-lysine monomethylation);GO:0018027(peptidyl-lysine dimethylation);GO:0042800(histone methyltransferase activity (H3-K4 specific));GO:0045944(positive regulation of transcription by RNA polymerase II);GO:0046975(histone m…	ENOG4111Y3G(set domain protein)	NA	NA	NA	NA(NA)	D5GG79.1 PF00856.26;SET;
TRINITY_DN10136_c1_g1	1048	TRINITY_DN10136_c1_g1_i1	SET domain-containing protein [Morchella conica CCBAS932]	set10	Ribosomal lysine N-methyltransferase set10 OS=Schizosaccharomyces pombe (strain 972 / ATCC 24843) GN=set10 PE=3 SV=1	GO:0005634(nucleus);GO:0005730(nucleolus);GO:0005829(cytosol);GO:0016279(protein-lysine N-methyltransferase activity);GO:0018023(peptidyl-lysine trimethylation);GO:0018026(peptidyl-lysine monomethylation);GO:0018027(peptidyl-lysine dimethylation);GO:0042254(ribosome biogenesis)	ENOG4111Y3G(set domain protein)	-	-	-	-	U4LA51.1 PF00856.26;SET;
TRINITY_DN10136_c1_g2	336	TRINITY_DN10136_c1_g2_i1	-	-	-	-	-	-	-	-	-	-
TRINITY_DN10137_c0_g2	756	TRINITY_DN10137_c0_g2_i1	-	-	-	-	-	-	-	-	-	-
TRINITY_DN10140_c0_g1	287	TRINITY_DN10140_c0_g1_i1	hypothetical protein MELLADRAFT_71560 [Melampsora larici-populina 98AG31]	RPS12	40S ribosomal protein S12 OS=Hordeum vulgare GN=RPS12 PE=2 SV=1	GO:0003735(structural constituent of ribosome);GO:0022627(cytosolic small ribosomal subunit)	COG1358((ribosomal) protein)	K02951	small subunit ribosomal protein S12e	-	mlr03010(Ribosome)	A0A0A0KA08.1 PF01248.24;Ribosomal_L7Ae;
TRINITY_DN10140_c0_g2	431	TRINITY_DN10140_c0_g2_i1	50S ribosomal protein L30e-like protein [Piptocephalis cylindrospora]	RPS12	40S ribosomal protein S12 OS=Hordeum vulgare GN=RPS12 PE=2 SV=1	GO:0003735(structural constituent of ribosome);GO:0022627(cytosolic small ribosomal subunit)	COG1358((ribosomal) protein)	K02951	small subunit ribosomal protein S12e	-	adl03010(Ribosome)	A0A0A0KA08.1 PF01248.24;Ribosomal_L7Ae;
TRINITY_DN10142_c0_g1	695	TRINITY_DN10142_c0_g1_i1	Metallo-dependent hydrolase [Morchella conica CCBAS932]	-	-	-	-	K01487	guanine deaminase	EC:3.5.4.3	cthr00230(Purine metabolism)	-
TRINITY_DN10142_c0_g2	298	TRINITY_DN10142_c0_g2_i1	Metallo-dependent hydrolase [Morchella conica CCBAS932]	GUD1	Probable guanine deaminase OS=Saccharomyces cerevisiae (strain ATCC 204508 / S288c) GN=GUD1 PE=1 SV=1	GO:0005575(cellular_component);GO:0008150(biological_process)	COG0402(deaminase)	K01487	guanine deaminase	EC:3.5.4.3	mgr00230(Purine metabolism)	A0A0F4ZLY2.1 PF01979.18;Amidohydro_1;
TRINITY_DN10142_c0_g3	1882	TRINITY_DN10142_c0_g3_i1	Metallo-dependent hydrolase [Morchella conica CCBAS932]	SPCC1672.03c	Probable guanine deaminase OS=Schizosaccharomyces pombe (strain 972 / ATCC 24843) GN=SPCC1672.03c PE=3 SV=1	GO:0005575(cellular_component);GO:0008150(biological_process)	COG0402(deaminase)	K01487	guanine deaminase	EC:3.5.4.3	psco00230(Purine metabolism)	R7Z120.1 PF01979.18;Amidohydro_1;
TRINITY_DN10143_c0_g1	590	TRINITY_DN10143_c0_g1_i1	hypothetical protein P167DRAFT_540841 [Morchella conica CCBAS932]	-	-	-	ENOG410ZB1F(NA)	-	-	-	-	-
TRINITY_DN10143_c0_g2	315	TRINITY_DN10143_c0_g2_i1	-	-	-	-	-	-	-	-	-	-
TRINITY_DN10143_c0_g3	532	TRINITY_DN10143_c0_g3_i1	hypothetical protein P167DRAFT_540841 [Morchella conica CCBAS932]	-	-	-	-	-	-	-	-	-
TRINITY_DN10143_c0_g4	934	TRINITY_DN10143_c0_g4_i1	hypothetical protein P167DRAFT_540346 [Morchella conica CCBAS932]	-	-	-	ENOG410ZB1F(NA)	-	-	-	-	-
TRINITY_DN10143_c0_g5	415	TRINITY_DN10143_c0_g5_i1	-	-	-	-	-	-	-	-	-	-
TRINITY_DN10144_c0_g1	1698	TRINITY_DN10144_c0_g1_i1	FAD/NAD(P)-binding domain-containing protein [Morchella conica CCBAS932]	DDB_G0270104	Probable NADH dehydrogenase OS=Dictyostelium discoideum GN=DDB_G0270104 PE=3 SV=2	GO:0005575(cellular_component)	COG1252(Nadh dehydrogenase)	K03885	NADH dehydrogenase	EC:1.6.99.3	tml00190(Oxidative phosphorylation)	D5GGL7.1 PF07992.12;Pyr_redox_2;
TRINITY_DN10147_c1_g1	1018	TRINITY_DN10147_c1_g1_i1	hypothetical protein PILCRDRAFT_818067 [Piloderma croceum F 1598]	-	-	-	-	-	-	-	-	-
TRINITY_DN10148_c0_g1	404	TRINITY_DN10148_c0_g1_i1	NADH:flavin oxidoreductase/NADH oxidase [Morchella conica CCBAS932]	-	-	GO:0003824(catalytic activity);GO:0005575(cellular_component);GO:0010181(FMN binding);GO:0016491(oxidoreductase activity);GO:0055114(oxidation-reduction process)	COG1902(NADH flavin oxidoreductase, NADH oxidase)	-	-	-	-	F9XIG7.1 PF00724.18;Oxidored_FMN;
TRINITY_DN10148_c0_g2	1094	TRINITY_DN10148_c0_g2_i1	NADH:flavin oxidoreductase/NADH oxidase [Morchella conica CCBAS932]	nadA	NADH-dependent flavin oxidoreductase nadA OS=Aspergillus parasiticus (strain ATCC 56775 / NRRL 5862 / SRRC 143 / SU-1) GN=nadA PE=2 SV=1	GO:0003824(catalytic activity);GO:0005575(cellular_component);GO:0010181(FMN binding);GO:0016491(oxidoreductase activity);GO:0055114(oxidation-reduction process)	COG1902(NADH flavin oxidoreductase, NADH oxidase)	K09580	protein disulfide-isomerase A1	EC:5.3.4.1	nhe04141(Protein processing in endoplasmic reticulum)	S3CJR0.1 PF00724.18;Oxidored_FMN;
TRINITY_DN10148_c1_g1	268	TRINITY_DN10148_c1_g1_i1	-	-	-	-	-	-	-	-	-	-
TRINITY_DN1014_c0_g1	266	TRINITY_DN1014_c0_g1_i1	-	CLDN1	Claudin-1 OS=Homo sapiens GN=CLDN1 PE=1 SV=1	GO:0001618(virus receptor activity);GO:0005198(structural molecule activity);GO:0005515(protein binding);GO:0005887(integral component of plasma membrane);GO:0005923(bicellular tight junction);GO:0016021(integral component of membrane);GO:0016324(apical plasma membrane);GO:0016328(lateral plasma membrane);GO:0016338(calcium-independent cell-cell adhesion via plasma membrane cell-adhesion molecule…	ENOG4111GMP(claudin 1)	-	-	-	-	I3LHE9.1 PF00822.18;PMP22_Claudin;
TRINITY_DN10150_c0_g1	2275	TRINITY_DN10150_c0_g1_i1	MFS general substrate transporter [Morchella conica CCBAS932]	SPBC1271.10c	Uncharacterized MFS-type transporter C1271.10c OS=Schizosaccharomyces pombe (strain 972 / ATCC 24843) GN=SPBC1271.10c PE=1 SV=1	GO:0003674(molecular_function);GO:0016021(integral component of membrane);GO:0055085(transmembrane transport)	COG0477(major facilitator Superfamily)	NA	NA	NA	NA(NA)	U4L9V6.1 PF07690.14;MFS_1;
TRINITY_DN10152_c0_g1	1606	TRINITY_DN10152_c0_g1_i1	glycoside hydrolase family 61 protein [Morchella conica CCBAS932]	Cel61a	Polysaccharide monooxygenase Cel61a OS=Myceliophthora thermophila (strain ATCC 42464 / BCRC 31852 / DSM 1799) GN=Cel61a PE=1 SV=1	GO:0005575(cellular_component);GO:0008810(cellulase activity);GO:0009251(glucan catabolic process)	ENOG4110UIU(glycoside hydrolase family 61 protein)	NA	NA	NA	NA(NA)	U4L5K7.1 PF03443.12;Glyco_hydro_61;
TRINITY_DN10158_c0_g1	319	TRINITY_DN10158_c0_g1_i1	hypothetical protein P167DRAFT_608882 [Morchella conica CCBAS932]	-	-	-	COG1112(Helicase)	-	-	-	-	-
TRINITY_DN10158_c0_g2	3897	TRINITY_DN10158_c0_g2_i1	hypothetical protein P167DRAFT_608882 [Morchella conica CCBAS932]	-	-	-	-	-	-	-	-	-
TRINITY_DN1015_c0_g1	1344	TRINITY_DN1015_c0_g1_i1	hypothetical protein P167DRAFT_558443, partial [Morchella conica CCBAS932]	-	-	GO:0003729(mRNA binding);GO:0005524(ATP binding);GO:0005634(nucleus);GO:0005657(replication fork);GO:0005737(cytoplasm);GO:0006283(transcription-coupled nucleotide-excision repair);GO:0006364(rRNA processing);GO:0006369(termination of RNA polymerase II transcription);GO:0006378(mRNA polyadenylation);GO:0008033(tRNA processing);GO:0008270(zinc ion binding);GO:0016180(snRNA processing);GO:0019904(p…	COG1112(Helicase)	NA	NA	NA	NA(NA)	-
TRINITY_DN10162_c0_g1	398	TRINITY_DN10162_c0_g1_i1	iron reductase [Lentinula edodes]	-	-	-	ENOG410XNZY(NADPH Oxidase)	-	-	-	-	V2WG08.1 PF08030.10;NAD_binding_6;
TRINITY_DN10163_c0_g1	1993	TRINITY_DN10163_c0_g1_i1;TRINITY_DN10163_c0_g1_i2	general substrate transporter [Morchella conica CCBAS932]	itr1	Myo-inositol transporter 1 OS=Schizosaccharomyces pombe (strain 972 / ATCC 24843) GN=itr1 PE=3 SV=1	GO:0005365(myo-inositol transmembrane transporter activity);GO:0015798(myo-inositol transport);GO:0016020(membrane);GO:0016021(integral component of membrane);GO:0055085(transmembrane transport)	ENOG410XNQK(Transporter)	NA	NA	NA	NA(NA)	D5GP42.1 PF00083.22;Sugar_tr;
TRINITY_DN10164_c0_g1	273	TRINITY_DN10164_c0_g1_i1	CMGC/GSK protein kinase [Mortierella verticillata NRRL 6337]	ASK5	Shaggy-related protein kinase epsilon OS=Arabidopsis thaliana GN=ASK5 PE=2 SV=1	GO:0004672(protein kinase activity);GO:0004674(protein serine/threonine kinase activity);GO:0005515(protein binding);GO:0005524(ATP binding);GO:0005829(cytosol);GO:0006972(hyperosmotic response);GO:0009507(chloroplast);GO:0009651(response to salt stress);GO:0046777(protein autophosphorylation)	COG0515(Serine Threonine protein kinase)	NA	NA	NA	NA(NA)	V4THA4.1 PF00069.23;Pkinase;
TRINITY_DN10165_c0_g1	471	TRINITY_DN10165_c0_g1_i1	hypothetical protein P167DRAFT_545856 [Morchella conica CCBAS932]	PXR1	Protein PXR1 OS=Phaeosphaeria nodorum (strain SN15 / ATCC MYA-4574 / FGSC 10173) GN=PXR1 PE=3 SV=1	GO:0003676(nucleic acid binding);GO:0005575(cellular_component);GO:0008150(biological_process)	ENOG410ZZF3(Involved in rRNA-processing at A0, A1 and A2 sites and regulates negatively telomerase (By similarity))	NA	NA	NA	NA(NA)	D5G5L8.1 PF01585.21;G-patch;
TRINITY_DN10165_c0_g2	1553	TRINITY_DN10165_c0_g2_i1	hypothetical protein P167DRAFT_545856 [Morchella conica CCBAS932]	PXR1	Protein PXR1 OS=Phaeosphaeria nodorum (strain SN15 / ATCC MYA-4574 / FGSC 10173) GN=PXR1 PE=3 SV=1	GO:0003676(nucleic acid binding);GO:0005575(cellular_component);GO:0008150(biological_process)	ENOG410ZZF3(Involved in rRNA-processing at A0, A1 and A2 sites and regulates negatively telomerase (By similarity))	NA	NA	NA	NA(NA)	D5G5L8.1 PF01585.21;G-patch;
TRINITY_DN10166_c0_g1	2440	TRINITY_DN10166_c0_g1_i1;TRINITY_DN10166_c0_g1_i2	hypothetical protein P167DRAFT_563882 [Morchella conica CCBAS932]	SPBC1709.03	Uncharacterized endoplasmic reticulum membrane protein C1709.03 OS=Schizosaccharomyces pombe (strain 972 / ATCC 24843) GN=SPBC1709.03 PE=3 SV=2	GO:0003674(molecular_function);GO:0005783(endoplasmic reticulum);GO:0008150(biological_process);GO:0016021(integral component of membrane)	ENOG41123XP(Conserved hypothetical, protein)	-	-	-	-	D5GJ65.1 PF12955.5;DUF3844;
TRINITY_DN10168_c0_g1	913	TRINITY_DN10168_c0_g1_i1;TRINITY_DN10168_c0_g1_i2;TRINITY_DN10168_c0_g1_i3	hypothetical protein P167DRAFT_568313 [Morchella conica CCBAS932]	-	-	-	-	-	-	-	-	-
TRINITY_DN10169_c0_g1	764	TRINITY_DN10169_c0_g1_i1	hypothetical protein P167DRAFT_544675 [Morchella conica CCBAS932]	-	-	-	-	-	-	-	-	-
TRINITY_DN1016_c0_g1	979	TRINITY_DN1016_c0_g1_i1	voltage-dependent ion-selective channel [Lentinula edodes]	B7H23.070	Mitochondrial outer membrane protein porin OS=Neurospora crassa (strain ATCC 24698 / 74-OR23-1A / CBS 708.71 / DSM 1257 / FGSC 987) GN=B7H23.070 PE=2 SV=1	GO:0005576(extracellular region);GO:0005886(plasma membrane);GO:0006811(ion transport);GO:0006915(apoptotic process);GO:0007005(mitochondrion organization);GO:0008308(voltage-gated anion channel activity);GO:0031307(integral component of mitochondrial outer membrane);GO:0044070(regulation of anion transport);GO:0045454(cell redox homeostasis);GO:0051027(DNA transport);GO:0055085(transmembrane tra…	ENOG410ZBK1(voltage-dependent anion channel)	NA	NA	NA	NA(NA)	V2YU96.1 PF01459.20;Porin_3;
TRINITY_DN10170_c0_g1	1927	TRINITY_DN10170_c0_g1_i1;TRINITY_DN10170_c0_g1_i2	Clavaminate synthase-like protein [Morchella conica CCBAS932]	-	Gamma-butyrobetaine dioxygenase OS=Pseudomonas sp. (strain AK-1) PE=1 SV=1	GO:0005739(mitochondrion);GO:0007005(mitochondrion organization);GO:0008336(gamma-butyrobetaine dioxygenase activity);GO:0045329(carnitine biosynthetic process);GO:0055114(oxidation-reduction process)	COG2175(dioxygenase)	K00471	gamma-butyrobetaine dioxygenase	EC:1.14.11.1	pic00310(Lysine degradation)	U4LC05.1 PF02668.14;TauD;
TRINITY_DN10170_c0_g2	1076	TRINITY_DN10170_c0_g2_i1	mitochondrial deoxynucleotide carrier [Morchella conica CCBAS932]	tpc1	Mitochondrial thiamine pyrophosphate carrier 1 OS=Aspergillus terreus (strain NIH 2624 / FGSC A1156) GN=tpc1 PE=3 SV=1	GO:0015234(thiamine transmembrane transporter activity);GO:0030974(thiamine pyrophosphate transmembrane transport);GO:0031305(integral component of mitochondrial inner membrane);GO:0055085(transmembrane transport)	ENOG410ZRF1(Solute carrier family 25)	NA	NA	NA	NA(NA)	U4LJS7.1 PF00153.25;Mito_carr;
TRINITY_DN10170_c0_g3	2582	TRINITY_DN10170_c0_g3_i1	JmjC-domain-containing protein, partial [Morchella conica CCBAS932]	KDM4D	Lysine-specific demethylase 4D OS=Homo sapiens GN=KDM4D PE=1 SV=3	GO:0000724(double-strand break repair via homologous recombination);GO:0001932(regulation of protein phosphorylation);GO:0005654(nucleoplasm);GO:0006351(transcription, DNA-templated);GO:0006355(regulation of transcription, DNA-templated);GO:0032452(histone demethylase activity);GO:0032454(histone demethylase activity (H3-K9 specific));GO:0033169(histone H3-K9 demethylation);GO:0035563(positive re…	ENOG410XP0T(lysine (K)-specific demethylase)	NA	NA	NA	NA(NA)	D5GBT7.1 PF02373.20;JmjC;
TRINITY_DN10173_c0_g1	212	TRINITY_DN10173_c0_g1_i1	importin beta-3 subunit [Drechmeria coniospora]	Ipo5	Importin-5 OS=Mus musculus GN=Ipo5 PE=1 SV=3	GO:0005515(protein binding);GO:0005634(nucleus);GO:0005737(cytoplasm);GO:0006607(NLS-bearing protein import into nucleus);GO:0006610(ribosomal protein import into nucleus);GO:0006886(intracellular protein transport);GO:0008139(nuclear localization sequence binding);GO:0008536(Ran GTPase binding);GO:0015031(protein transport);GO:0031965(nuclear membrane);GO:0034399(nuclear periphery);GO:0042307(po…	ENOG410XQAJ(Importin)	NA	NA	NA	NA(NA)	-
TRINITY_DN10174_c0_g1	2403	TRINITY_DN10174_c0_g1_i1	DHS-like NAD/FAD-binding domain-containing protein [Morchella conica CCBAS932]	AN1226	NAD-dependent protein deacetylase hst4 OS=Emericella nidulans (strain FGSC A4 / ATCC 38163 / CBS 112.46 / NRRL 194 / M139) GN=AN1226 PE=3 SV=1	GO:0005634(nucleus);GO:0005739(mitochondrion);GO:0006348(chromatin silencing at telomere);GO:0017136(NAD-dependent histone deacetylase activity);GO:0033248(negative regulation of penicillin catabolic process);GO:0036166(phenotypic switching);GO:0044182(filamentous growth of a population of unicellular organisms);GO:0046459(short-chain fatty acid metabolic process);GO:0070403(NAD+ binding);GO:0071…	COG0846(NAD-dependent protein deacetylase which modulates the activities of several enzymes which are inactive in their acetylated form)	K11121	NAD-dependent histone deacetylase SIR2	EC:3.5.1.-	psco00760(Nicotinate and nicotinamide metabolism)	U4LGV0.1 PF02146.15;SIR2;
TRINITY_DN1017_c0_g1	414	TRINITY_DN1017_c0_g1_i1	isoleucyl-tRNA synthetase [Morchella conica CCBAS932]	ileS	Isoleucine--tRNA ligase OS=Cyanothece sp. (strain PCC 7425 / ATCC 29141) GN=ileS PE=3 SV=1	GO:0002161(aminoacyl-tRNA editing activity);GO:0004812(aminoacyl-tRNA ligase activity);GO:0004822(isoleucine-tRNA ligase activity);GO:0005524(ATP binding);GO:0005739(mitochondrion);GO:0005829(cytosol);GO:0006418(tRNA aminoacylation for protein translation);GO:0006428(isoleucyl-tRNA aminoacylation);GO:0032543(mitochondrial translation)	COG0060(amino acids such as valine, to avoid such errors it has two additional distinct tRNA(Ile)-dependent editing activities. One activity is designated as 'pretransfer' editing and involves the hydrolysis of activated Val-AMP. The other activity is designated 'posttransfer' editing and involves deacylation of mischarged Val-tRNA(Ile) (By similarity))	K01870	isoleucyl-tRNA synthetase	EC:6.1.1.5	tml00970(Aminoacyl-tRNA biosynthesis)	D5GNE9.1 PF00133.20;tRNA-synt_1;
TRINITY_DN1017_c0_g2	750	TRINITY_DN1017_c0_g2_i1	isoleucyl-tRNA synthetase [Morchella conica CCBAS932]	ileS	Isoleucine--tRNA ligase OS=Nostoc sp. (strain PCC 7120 / SAG 25.82 / UTEX 2576) GN=ileS PE=3 SV=1	GO:0002161(aminoacyl-tRNA editing activity);GO:0003824(catalytic activity);GO:0004812(aminoacyl-tRNA ligase activity);GO:0004822(isoleucine-tRNA ligase activity);GO:0005524(ATP binding);GO:0005739(mitochondrion);GO:0005829(cytosol);GO:0006418(tRNA aminoacylation for protein translation);GO:0006428(isoleucyl-tRNA aminoacylation);GO:0032543(mitochondrial translation)	COG0060(amino acids such as valine, to avoid such errors it has two additional distinct tRNA(Ile)-dependent editing activities. One activity is designated as 'pretransfer' editing and involves the hydrolysis of activated Val-AMP. The other activity is designated 'posttransfer' editing and involves deacylation of mischarged Val-tRNA(Ile) (By similarity))	K01870	isoleucyl-tRNA synthetase	EC:6.1.1.5	tml00970(Aminoacyl-tRNA biosynthesis)	W7HIS5.1 PF00133.20;tRNA-synt_1;
TRINITY_DN10180_c0_g1	464	TRINITY_DN10180_c0_g1_i1	-	-	-	-	-	-	-	-	-	-
TRINITY_DN10180_c0_g2	220	TRINITY_DN10180_c0_g2_i1	-	-	-	-	-	-	-	-	-	-
TRINITY_DN10180_c0_g3	388	TRINITY_DN10180_c0_g3_i1	-	-	-	-	-	-	-	-	-	-
TRINITY_DN10180_c0_g4	1580	TRINITY_DN10180_c0_g4_i1	hypothetical protein P167DRAFT_544732 [Morchella conica CCBAS932]	-	-	-	-	-	-	-	-	-
TRINITY_DN10181_c0_g1	1095	TRINITY_DN10181_c0_g1_i1	hypothetical protein P167DRAFT_539350 [Morchella conica CCBAS932]	-	-	-	-	-	-	-	-	-
TRINITY_DN10183_c0_g1	629	TRINITY_DN10183_c0_g1_i1	hypothetical protein P167DRAFT_567023 [Morchella conica CCBAS932]	-	-	-	-	-	-	-	-	-
TRINITY_DN10183_c0_g2	1202	TRINITY_DN10183_c0_g2_i1	hypothetical protein P167DRAFT_567023 [Morchella conica CCBAS932]	-	-	-	-	-	-	-	-	-
TRINITY_DN10185_c0_g1	407	TRINITY_DN10185_c0_g1_i1	S-adenosylmethionine decarboxylase proenzyme Spe2 [Schizosaccharomyces japonicus yFS275]	SAMDC	S-adenosylmethionine decarboxylase proenzyme OS=Catharanthus roseus GN=SAMDC PE=1 SV=1	GO:0004014(adenosylmethionine decarboxylase activity);GO:0005829(cytosol);GO:0006597(spermine biosynthetic process);GO:0008295(spermidine biosynthetic process)	ENOG410XRN0(S-adenosylmethionine decarboxylase proenzyme)	K01611	S-adenosylmethionine decarboxylase	EC:4.1.1.50	yli00270(Cysteine and methionine metabolism);yli00330(Arginine and proline metabolism)	A0A0A0L7F8.1 PF01536.14;SAM_decarbox;
TRINITY_DN10185_c0_g2	838	TRINITY_DN10185_c0_g2_i1	hypothetical protein LIPSTDRAFT_1069 [Lipomyces starkeyi NRRL Y-11557]	SAMDC	S-adenosylmethionine decarboxylase proenzyme OS=Datura stramonium GN=SAMDC PE=2 SV=1	GO:0004014(adenosylmethionine decarboxylase activity);GO:0005829(cytosol);GO:0006597(spermine biosynthetic process);GO:0008295(spermidine biosynthetic process)	ENOG410XRN0(S-adenosylmethionine decarboxylase proenzyme)	K01611	S-adenosylmethionine decarboxylase	EC:4.1.1.50	wse00270(Cysteine and methionine metabolism);wse00330(Arginine and proline metabolism)	A0A0A0L7F8.1 PF01536.14;SAM_decarbox;
TRINITY_DN10186_c0_g1	517	TRINITY_DN10186_c0_g1_i1	kinase-like protein [Morchella conica CCBAS932]	-	-	-	-	-	-	-	-	-
TRINITY_DN10186_c0_g2	2842	TRINITY_DN10186_c0_g2_i1	kinase-like protein [Morchella conica CCBAS932]	MPK10	Mitogen-activated protein kinase 10 OS=Oryza sativa subsp. japonica GN=MPK10 PE=2 SV=2	GO:0004672(protein kinase activity);GO:0005524(ATP binding);GO:0005575(cellular_component);GO:0006468(protein phosphorylation);GO:0016772(transferase activity, transferring phosphorus-containing groups)	ENOG4111GF2(serine threonine protein kinase)	K03283	heat shock 70kDa protein 1/2/6/8	-	plj03040(Spliceosome);plj04141(Protein processing in endoplasmic reticulum);plj04144(Endocytosis)	J5J2V5.1 PF00069.23;Pkinase;
TRINITY_DN10186_c0_g3	285	TRINITY_DN10186_c0_g3_i1	hypothetical protein P167DRAFT_480639, partial [Morchella conica CCBAS932]	-	-	-	-	-	-	-	-	-
TRINITY_DN10189_c0_g2	1124	TRINITY_DN10189_c0_g2_i1	-	-	-	-	-	-	-	-	-	-
TRINITY_DN1018_c0_g1	209	TRINITY_DN1018_c0_g1_i1	hypothetical protein P167DRAFT_512474, partial [Morchella conica CCBAS932]	-	-	-	-	-	-	-	-	-
TRINITY_DN1018_c0_g2	961	TRINITY_DN1018_c0_g2_i1	hypothetical protein P167DRAFT_512474, partial [Morchella conica CCBAS932]	serac1	Protein SERAC1 OS=Danio rerio GN=serac1 PE=3 SV=1	GO:0005575(cellular_component);GO:0008150(biological_process);GO:0043531(ADP binding)	ENOG410YT96(NA)	K07827	GTPase KRas	-	pfy04138(Autophagy - yeast);pfy04933(AGE-RAGE signaling pathway in diabetic complications)	D5GHB8.1 PF05057.12;DUF676;
TRINITY_DN10190_c1_g1	2960	TRINITY_DN10190_c1_g1_i1;TRINITY_DN10190_c1_g1_i2	DEAD-domain-containing protein [Morchella conica CCBAS932]	mss116	ATP-dependent RNA helicase mss116, mitochondrial OS=Neosartorya fumigata (strain ATCC MYA-4609 / Af293 / CBS 101355 / FGSC A1100) GN=mss116 PE=3 SV=1	GO:0004004(ATP-dependent RNA helicase activity);GO:0010501(RNA secondary structure unwinding)	COG0513(purine NTP-dependent helicase activity)	NA	NA	NA	NA(NA)	D5G3T9.1 PF00270.27;DEAD;
TRINITY_DN10191_c0_g1	271	TRINITY_DN10191_c0_g1_i1	-	Kng1	Kininogen-1 OS=Mus musculus GN=Kng1 PE=1 SV=1	GO:0004866(endopeptidase inhibitor activity);GO:0004869(cysteine-type endopeptidase inhibitor activity);GO:0005102(receptor binding);GO:0005576(extracellular region);GO:0005615(extracellular space);GO:0006954(inflammatory response);GO:0007204(positive regulation of cytosolic calcium ion concentration);GO:0007596(blood coagulation);GO:0007599(hemostasis);GO:0010466(negative regulation of peptidase…	ENOG4111ZQ8(kininogen 1)	-	-	-	-	Q6S9I0.1 PF00031.19;Cystatin;
TRINITY_DN10192_c0_g1	616	TRINITY_DN10192_c0_g1_i1	-	-	-	-	-	-	-	-	-	-
TRINITY_DN10193_c0_g1	271	TRINITY_DN10193_c0_g1_i1	-	-	-	-	-	-	-	-	-	-
TRINITY_DN10194_c0_g1	256	TRINITY_DN10194_c0_g1_i1	UDP-glucose 4-epimerase [Lentinula edodes]	galE	UDP-glucose 4-epimerase OS=Dictyostelium discoideum GN=galE PE=1 SV=1	GO:0003974(UDP-N-acetylglucosamine 4-epimerase activity);GO:0003978(UDP-glucose 4-epimerase activity);GO:0005575(cellular_component);GO:0005975(carbohydrate metabolic process);GO:0006012(galactose metabolic process);GO:0016853(isomerase activity);GO:0016857(racemase and epimerase activity, acting on carbohydrates and derivatives)	COG1087(udp-glucose 4-epimerase)	K01784	UDP-glucose 4-epimerase	EC:5.1.3.2	scm00052(Galactose metabolism);scm00520(Amino sugar and nucleotide sugar metabolism)	M2QGH0.1 PF16363.3;GDP_Man_Dehyd;
TRINITY_DN10195_c0_g1	224	TRINITY_DN10195_c0_g1_i1	-	SLC38A2	Sodium-coupled neutral amino acid transporter 2 OS=Homo sapiens GN=SLC38A2 PE=1 SV=2	GO:0003333(amino acid transmembrane transport);GO:0005515(protein binding);GO:0005886(plasma membrane);GO:0005887(integral component of plasma membrane);GO:0005903(brush border);GO:0006814(sodium ion transport);GO:0006865(amino acid transport);GO:0007565(female pregnancy);GO:0014047(glutamate secretion);GO:0015171(amino acid transmembrane transporter activity);GO:0015293(symporter activity);GO:00…	COG0814(amino acid transport)	-	-	-	-	H2Q5R9.1 PF01490.16;Aa_trans;
TRINITY_DN10196_c0_g1	209	TRINITY_DN10196_c0_g1_i1	WD40 repeat-like protein [Morchella conica CCBAS932]	-	-	GO:0003674(molecular_function);GO:0005634(nucleus);GO:0005789(endoplasmic reticulum membrane);GO:0008150(biological_process);GO:0044732(mitotic spindle pole body)	ENOG410XQPJ(WD repeatcontaining protein)	NA	NA	NA	NA(NA)	-
TRINITY_DN10196_c0_g2	1532	TRINITY_DN10196_c0_g2_i1	WD40 repeat-like protein [Morchella conica CCBAS932]	swd2	Set1 complex component swd2 OS=Schizosaccharomyces pombe (strain 972 / ATCC 24843) GN=swd2 PE=3 SV=1	GO:0000723(telomere maintenance);GO:0005829(cytosol);GO:0005847(mRNA cleavage and polyadenylation specificity factor complex);GO:0030846(termination of RNA polymerase II transcription, poly(A)-coupled);GO:0030847(termination of RNA polymerase II transcription, exosome-dependent);GO:0031124(mRNA 3'-end processing);GO:0031126(snoRNA 3'-end processing);GO:0034729(histone H3-K79 methylation);GO:00428…	ENOG410XT9X(histone H3-K4 methylation)	K14962	COMPASS component SWD2	-	tml03015(mRNA surveillance pathway)	Q5BHB5.1 PF12894.5;ANAPC4_WD40;
TRINITY_DN10196_c0_g3	205	TRINITY_DN10196_c0_g3_i1	WD40 repeat-like protein [Morchella conica CCBAS932]	SPAC3H5.08c	Uncharacterized WD repeat-containing protein C3H5.08c OS=Schizosaccharomyces pombe (strain 972 / ATCC 24843) GN=SPAC3H5.08c PE=1 SV=2	GO:0003674(molecular_function);GO:0005634(nucleus);GO:0005789(endoplasmic reticulum membrane);GO:0008150(biological_process);GO:0044732(mitotic spindle pole body)	ENOG410XQPJ(WD repeatcontaining protein)	NA	NA	NA	NA(NA)	D5GH45.1 PF00400.30;WD40;
TRINITY_DN10196_c0_g4	1957	TRINITY_DN10196_c0_g4_i1	WD40 repeat-like protein [Morchella conica CCBAS932]	-	-	GO:0003674(molecular_function);GO:0005634(nucleus);GO:0005789(endoplasmic reticulum membrane);GO:0008150(biological_process);GO:0044732(mitotic spindle pole body)	ENOG410XQPJ(WD repeatcontaining protein)	NA	NA	NA	NA(NA)	-
TRINITY_DN10197_c0_g1	264	TRINITY_DN10197_c0_g1_i1	-	Ighm	Ig mu chain C region OS=Mus musculus GN=Ighm PE=1 SV=2	GO:0005886(plasma membrane)	ENOG4111XUQ(immunoglobulin heavy constant)	-	-	-	-	A0A075B5P6.1 PF07654.13;C1-set;
TRINITY_DN10197_c0_g2	278	TRINITY_DN10197_c0_g2_i1	-	Ighm	Ig mu chain C region OS=Mus musculus GN=Ighm PE=1 SV=2	GO:0005886(plasma membrane)	ENOG4111XUQ(immunoglobulin heavy constant)	-	-	-	-	P01872.2 PF07654.13;C1-set;
TRINITY_DN10198_c0_g1	447	TRINITY_DN10198_c0_g1_i1	hypothetical protein P167DRAFT_533947 [Morchella conica CCBAS932]	-	-	-	-	-	-	-	-	-
TRINITY_DN10198_c0_g2	859	TRINITY_DN10198_c0_g2_i1	hypothetical protein P167DRAFT_533947 [Morchella conica CCBAS932]	-	-	GO:0000742(karyogamy involved in conjugation with cellular fusion);GO:0003674(molecular_function);GO:0005829(cytosol);GO:0005868(cytoplasmic dynein complex);GO:0030989(dynein-driven meiotic oscillatory nuclear movement);GO:0032117(horsetail-astral microtubule array);GO:0035974(meiotic spindle pole body);GO:0044732(mitotic spindle pole body);GO:0044816(Nsk1-Dlc1 complex);GO:0051315(attachment of m…	ENOG4111Z1N(Dynein light chain tctex1)	-	-	-	-	D5GPA4.1 PF03645.11;Tctex-1;
TRINITY_DN1019_c0_g1	1419	TRINITY_DN1019_c0_g1_i1;TRINITY_DN1019_c0_g1_i2	hypothetical protein P167DRAFT_539411 [Morchella conica CCBAS932]	-	-	-	ENOG410YCPD(NA)	-	-	-	-	A0A066XJV8.1 PF12697.5;Abhydrolase_6;
TRINITY_DN101_c0_g1	212	TRINITY_DN101_c0_g1_i1	ribosomal protein S14p/S29e-domain-containing protein [Syncephalis pseudoplumigaleata]	RPS29	40S ribosomal protein S29 OS=Bos taurus GN=RPS29 PE=3 SV=2	GO:0003735(structural constituent of ribosome);GO:0008270(zinc ion binding);GO:0022627(cytosolic small ribosomal subunit)	COG0199(Binds 16S rRNA, required for the assembly of 30S particles and may also be responsible for determining the conformation of the 16S rRNA at the A site (By similarity))	K02980	small subunit ribosomal protein S29e	-	zro03010(Ribosome)	G3VTA9.1 PF00253.19;Ribosomal_S14;
TRINITY_DN10201_c0_g1	363	TRINITY_DN10201_c0_g1_i1	-	-	-	-	-	-	-	-	-	-
TRINITY_DN10202_c0_g1	970	TRINITY_DN10202_c0_g1_i1	cytochrome P450 [Morchella conica CCBAS932]	aflG	Averantin hydroxylase OS=Aspergillus parasiticus (strain ATCC 56775 / NRRL 5862 / SRRC 143 / SU-1) GN=aflG PE=1 SV=2	GO:0005506(iron ion binding);GO:0005575(cellular_component);GO:0009055(electron transfer activity);GO:0016705(oxidoreductase activity, acting on paired donors, with incorporation or reduction of molecular oxygen);GO:0020037(heme binding);GO:0055114(oxidation-reduction process)	COG2124(Cytochrome p450)	K05658	ATP-binding cassette, subfamily B (MDR/TAP), member 1	EC:3.6.3.44	glz02010(ABC transporters)	U4LVN4.1 PF00067.20;p450;
TRINITY_DN10203_c0_g1	965	TRINITY_DN10203_c0_g1_i1	-	-	-	-	-	-	-	-	-	-
TRINITY_DN10204_c0_g1	2464	TRINITY_DN10204_c0_g1_i1;TRINITY_DN10204_c0_g1_i2	RNA-binding domain-containing protein, partial [Morchella conica CCBAS932]	usp101	U1 small nuclear ribonucleoprotein 70 kDa homolog OS=Schizosaccharomyces pombe (strain 972 / ATCC 24843) GN=usp101 PE=1 SV=1	GO:0000166(nucleotide binding);GO:0003676(nucleic acid binding);GO:0005685(U1 snRNP);GO:0005829(cytosol);GO:0008150(biological_process)	COG0724(Rna-binding protein)	K11093	U1 small nuclear ribonucleoprotein 70kDa	-	tml03040(Spliceosome)	D5GCF9.1 PF12220.6;U1snRNP70_N;
TRINITY_DN10205_c0_g1	2484	TRINITY_DN10205_c0_g1_i1;TRINITY_DN10205_c0_g1_i2	peptidase C14 [Morchella conica CCBAS932]	MCA1	Metacaspase-1 OS=Ajellomyces capsulatus (strain NAm1 / WU24) GN=MCA1 PE=3 SV=1	GO:0005575(cellular_component)	ENOG410Y41C(Metacaspase)	NA	NA	NA	NA(NA)	D5GGU1.1 PF00656.20;Peptidase_C14;
TRINITY_DN10205_c0_g2	1853	TRINITY_DN10205_c0_g2_i1	hypothetical protein P167DRAFT_483112 [Morchella conica CCBAS932]	SPCC1840.05c	Probable phosphoribomutase OS=Schizosaccharomyces pombe (strain 972 / ATCC 24843) GN=SPCC1840.05c PE=1 SV=1	GO:0005829(cytosol)	COG1109(Catalyzes the conversion of glucosamine-6-phosphate to glucosamine-1-phosphate (By similarity))	K01835	phosphoglucomutase	EC:5.4.2.2	bze00010(Glycolysis / Gluconeogenesis);bze00030(Pentose phosphate pathway);bze00052(Galactose metabolism);bze00500(Starch and sucrose metabolism);bze00520(Amino sugar and nucleotide sugar metabolism);bze00230(Purine metabolism)	U4LNS8.1 PF02878.14;PGM_PMM_I;
TRINITY_DN10206_c0_g1	446	TRINITY_DN10206_c0_g1_i1;TRINITY_DN10206_c0_g1_i2	hypothetical protein P167DRAFT_561665 [Morchella conica CCBAS932]	-	-	GO:0003674(molecular_function);GO:0005575(cellular_component);GO:0008150(biological_process)	ENOG4111VFK(stress responsive A B Barrel)	-	-	-	-	G3XWH9.1 PF07876.10;Dabb;
TRINITY_DN10207_c0_g1	437	TRINITY_DN10207_c0_g1_i1	WD40 repeat-like protein [Morchella conica CCBAS932]	mcl1	Minichromosome loss protein 1 OS=Schizosaccharomyces pombe (strain 972 / ATCC 24843) GN=mcl1 PE=1 SV=1	GO:0003674(molecular_function);GO:0005575(cellular_component)	ENOG410XSJV(WD repeat and HMG-box DNA binding protein 1)	NA	NA	NA	NA(NA)	D5GK96.1 PF12341.6;Mcl1_mid;
TRINITY_DN10208_c0_g1	541	TRINITY_DN10208_c0_g1_i1	hypothetical protein C2G38_1967722 [Gigaspora rosea]	Csrp1	Cysteine and glycine-rich protein 1 OS=Mus musculus GN=Csrp1 PE=1 SV=3	GO:0005515(protein binding);GO:0005634(nucleus);GO:0015629(actin cytoskeleton);GO:0030036(actin cytoskeleton organization);GO:0046872(metal ion binding)	ENOG4111F3Y(Cysteine and glycine-rich protein 1)	-	-	-	-	J9NYN2.1 PF00412.20;LIM;
TRINITY_DN10208_c0_g2	1013	TRINITY_DN10208_c0_g2_i1	-	CSRP1	Cysteine and glycine-rich protein 1 OS=Bos taurus GN=CSRP1 PE=2 SV=3	GO:0005634(nucleus);GO:0005925(focal adhesion);GO:0008270(zinc ion binding);GO:0070062(extracellular exosome);GO:0070527(platelet aggregation)	ENOG4111F3Y(Cysteine and glycine-rich protein 1)	-	-	-	-	-
TRINITY_DN10209_c0_g1	879	TRINITY_DN10209_c0_g1_i1	hypothetical protein P167DRAFT_544493 [Morchella conica CCBAS932]	-	-	-	-	-	-	-	-	-
TRINITY_DN10211_c0_g1	396	TRINITY_DN10211_c0_g1_i1	60S ribosomal protein L3 [Syncephalis pseudoplumigaleata]	ARP2	60S ribosomal protein L3-2 OS=Arabidopsis thaliana GN=ARP2 PE=2 SV=4	GO:0000027(ribosomal large subunit assembly);GO:0003735(structural constituent of ribosome);GO:0006412(translation);GO:0022625(cytosolic large ribosomal subunit)	COG0087(One of the primary rRNA binding proteins, it binds directly near the 3'-end of the 23S rRNA, where it nucleates assembly of the 50S subunit (By similarity))	K02925	large subunit ribosomal protein L3e	-	spo03010(Ribosome)	A0A0A0KAJ9.1 PF00297.20;Ribosomal_L3;
TRINITY_DN10212_c0_g1	263	TRINITY_DN10212_c0_g1_i1	60s ribosomal protein l28 [Lentinula edodes]	-	-	GO:0003735(structural constituent of ribosome);GO:0006412(translation);GO:0022625(cytosolic large ribosomal subunit)	ENOG4111T32(protein complex subunit organization)	K02903	large subunit ribosomal protein L28e	-	mrr03010(Ribosome)	V2XYI6.1 PF01778.15;Ribosomal_L28e;
TRINITY_DN10214_c0_g1	399	TRINITY_DN10214_c0_g1_i1	AMP deaminase [Morchella conica CCBAS932]	-	-	-	-	-	-	-	-	-
TRINITY_DN10215_c0_g1	546	TRINITY_DN10215_c0_g1_i1	hypothetical protein JAAARDRAFT_118193 [Jaapia argillacea MUCL 33604]	D6PKL2	Serine/threonine-protein kinase D6PKL2 OS=Arabidopsis thaliana GN=D6PKL2 PE=1 SV=1	GO:0004674(protein serine/threonine kinase activity);GO:0005634(nucleus);GO:0005737(cytoplasm);GO:0005886(plasma membrane);GO:0035556(intracellular signal transduction)	ENOG410XQ0C(serine threonine-protein kinase)	NA	NA	NA	NA(NA)	B9IH04.2 PF00069.23;Pkinase;
TRINITY_DN10218_c0_g1	3348	TRINITY_DN10218_c0_g1_i1;TRINITY_DN10218_c0_g1_i2	kinase-like protein [Morchella conica CCBAS932]	ksp1	Serine/threonine-protein kinase ksp1 OS=Schizosaccharomyces pombe (strain 972 / ATCC 24843) GN=ksp1 PE=1 SV=1	GO:0005575(cellular_component)	COG0515(Serine Threonine protein kinase)	NA	NA	NA	NA(NA)	D5GEJ5.1 PF00069.23;Pkinase;
TRINITY_DN10218_c0_g2	471	TRINITY_DN10218_c0_g2_i1	-	-	-	-	-	-	-	-	-	-
TRINITY_DN10218_c0_g3	345	TRINITY_DN10218_c0_g3_i1	-	-	-	-	-	-	-	-	-	-
TRINITY_DN10219_c0_g1	1331	TRINITY_DN10219_c0_g1_i1	hypothetical protein P167DRAFT_538166 [Morchella conica CCBAS932]	-	-	GO:0003674(molecular_function);GO:0005575(cellular_component);GO:0008150(biological_process)	ENOG411253U(Conserved hypothetical, protein)	-	-	-	-	-
TRINITY_DN1021_c0_g1	245	TRINITY_DN1021_c0_g1_i1	hypothetical protein RclHR1_00780017 [Rhizophagus clarus]	Ecm29	Proteasome-associated protein ECM29 homolog OS=Mus musculus GN=Ecm29 PE=1 SV=3	GO:0000502(proteasome complex);GO:0005634(nucleus);GO:0005737(cytoplasm);GO:0005768(endosome);GO:0005769(early endosome);GO:0005770(late endosome);GO:0005771(multivesicular body);GO:0005783(endoplasmic reticulum);GO:0005813(centrosome);GO:0005856(cytoskeleton);GO:0030134(COPII-coated ER to Golgi transport vesicle);GO:0030139(endocytic vesicle);GO:0030433(ubiquitin-dependent ERAD pathway);GO:00314…	ENOG410XPYT(Proteasome-associated protein ECM29 homolog)	-	-	-	-	-
TRINITY_DN10220_c0_g1	627	TRINITY_DN10220_c0_g1_i1	hypothetical protein P167DRAFT_232868 [Morchella conica CCBAS932]	-	-	GO:0003674(molecular_function);GO:0005575(cellular_component);GO:0008150(biological_process)	COG3540(alkaline phosphatase)	K01113	alkaline phosphatase D	EC:3.1.3.1	pte00790(Folate biosynthesis)	Q0U6Z9.2 PF09423.8;PhoD;
TRINITY_DN10220_c0_g2	356	TRINITY_DN10220_c0_g2_i1	-	-	-	-	-	-	-	-	-	-
TRINITY_DN10220_c0_g3	1520	TRINITY_DN10220_c0_g3_i1	hypothetical protein P167DRAFT_232868 [Morchella conica CCBAS932]	pld	Phospholipase D OS=Streptomyces chromofuscus GN=pld PE=1 SV=2	GO:0003674(molecular_function);GO:0005575(cellular_component);GO:0008150(biological_process)	COG3540(alkaline phosphatase)	K01113	alkaline phosphatase D	EC:3.1.3.1	pfy00790(Folate biosynthesis)	W7II48.1 PF09423.8;PhoD;
TRINITY_DN10221_c0_g1	208	TRINITY_DN10221_c0_g1_i1	-	-	-	-	-	-	-	-	-	-
TRINITY_DN10221_c0_g2	2376	TRINITY_DN10221_c0_g2_i1	hypothetical protein P167DRAFT_541059 [Morchella conica CCBAS932]	-	-	-	-	NA	NA	NA	NA(NA)	-
TRINITY_DN10222_c0_g1	397	TRINITY_DN10222_c0_g1_i1	hypothetical protein JAAARDRAFT_173948 [Jaapia argillacea MUCL 33604]	-	Eukaryotic initiation factor 4A-8 OS=Nicotiana tabacum PE=2 SV=1	GO:0004004(ATP-dependent RNA helicase activity);GO:0006413(translational initiation);GO:0010468(regulation of gene expression);GO:0010501(RNA secondary structure unwinding)	COG0513(purine NTP-dependent helicase activity)	K03257	translation initiation factor 4A	-	tvs03013(RNA transport)	M0X5Z1.1 PF00271.29;Helicase_C;
TRINITY_DN10226_c0_g1	495	TRINITY_DN10226_c0_g1_i1;TRINITY_DN10226_c0_g1_i2	hypothetical protein OBBRIDRAFT_833801 [Obba rivulosa]	Fkbp8	Peptidyl-prolyl cis-trans isomerase FKBP8 OS=Mus musculus GN=Fkbp8 PE=1 SV=2	GO:0000413(protein peptidyl-prolyl isomerization);GO:0001708(cell fate specification);GO:0001933(negative regulation of protein phosphorylation);GO:0003755(peptidyl-prolyl cis-trans isomerase activity);GO:0005528(FK506 binding);GO:0005737(cytoplasm);GO:0005739(mitochondrion);GO:0005740(mitochondrial envelope);GO:0005783(endoplasmic reticulum);GO:0005829(cytosol);GO:0006915(apoptotic process);GO:0…	COG0545(Peptidyl-prolyl cis-trans isomerase)	-	-	-	-	G3H495.1 PF13432.4;TPR_16;
TRINITY_DN10227_c0_g1	369	TRINITY_DN10227_c0_g1_i1	hypothetical protein P167DRAFT_499219 [Morchella conica CCBAS932]	-	-	-	-	-	-	-	-	-
TRINITY_DN10227_c0_g2	1478	TRINITY_DN10227_c0_g2_i1	hypothetical protein P167DRAFT_499219 [Morchella conica CCBAS932]	yanI	O-Mevalon transferase yanI OS=Aspergillus niger (strain ATCC 1015 / CBS 113.46 / FGSC A1144 / LSHB Ac4 / NCTC 3858a / NRRL 328 / USDA 3528.7) GN=yanI PE=1 SV=1	GO:0003674(molecular_function);GO:0005575(cellular_component);GO:0008150(biological_process)	ENOG410YTKW(NA)	NA	NA	NA	NA(NA)	Q5B9S2.1 PF13813.4;MBOAT_2;
TRINITY_DN10227_c0_g3	2007	TRINITY_DN10227_c0_g3_i1	Phosphoacetylglucosamine mutase [Morchella conica CCBAS932]	SPAC1296.01c	Phosphoacetylglucosamine mutase 2 OS=Schizosaccharomyces pombe (strain 972 / ATCC 24843) GN=SPAC1296.01c PE=1 SV=2	GO:0004610(phosphoacetylglucosamine mutase activity);GO:0005829(cytosol);GO:0006048(UDP-N-acetylglucosamine biosynthetic process);GO:0034221(fungal-type cell wall chitin biosynthetic process)	COG1109(Catalyzes the conversion of glucosamine-6-phosphate to glucosamine-1-phosphate (By similarity))	K01836	phosphoacetylglucosamine mutase	EC:5.4.2.3	tml00520(Amino sugar and nucleotide sugar metabolism)	W9C1B9.1 PF02880.14;PGM_PMM_III;
TRINITY_DN10228_c0_g1	207	TRINITY_DN10228_c0_g1_i1	amino acid transporter [Lentinula edodes]	-	-	-	-	-	-	-	-	-
TRINITY_DN10229_c0_g1	1198	TRINITY_DN10229_c0_g1_i1;TRINITY_DN10229_c0_g1_i2	hypothetical protein P167DRAFT_531367 [Morchella conica CCBAS932]	-	-	GO:0003674(molecular_function);GO:0005575(cellular_component);GO:0008150(biological_process)	ENOG410ZBIA(NA)	-	-	-	-	A7F2W1.1 PF12720.5;DUF3807;
TRINITY_DN1022_c0_g1	901	TRINITY_DN1022_c0_g1_i1	hypothetical protein GYMLUDRAFT_40498 [Gymnopus luxurians FD-317 M1]	-	-	-	ENOG41120UY(NAD dependent epimerase dehydratase family protein)	-	-	-	-	A0A067N568.1 PF01370.19;Epimerase;
TRINITY_DN10230_c0_g1	563	TRINITY_DN10230_c0_g1_i1	-	-	-	-	-	-	-	-	-	-
TRINITY_DN10230_c0_g2	1800	TRINITY_DN10230_c0_g2_i1	Metallo-dependent hydrolase, partial [Morchella conica CCBAS932]	HI_0454	Uncharacterized metal-dependent hydrolase HI_0454 OS=Haemophilus influenzae (strain ATCC 51907 / DSM 11121 / KW20 / Rd) GN=HI_0454 PE=3 SV=1	GO:0004536(deoxyribonuclease activity);GO:0006308(DNA catabolic process)	COG0084(tatd family)	NA	NA	NA	NA(NA)	K5X2I6.1 PF01026.19;TatD_DNase;
TRINITY_DN10230_c0_g3	237	TRINITY_DN10230_c0_g3_i1	-	-	-	-	-	-	-	-	-	-
TRINITY_DN10231_c0_g1	482	TRINITY_DN10231_c0_g1_i1	MFS general substrate transporter [Morchella conica CCBAS932]	-	-	GO:0005215(transporter activity);GO:0034220(ion transmembrane transport);GO:0071627(integral component of fungal-type vacuolar membrane)	ENOG4111RPW(Major Facilitator Superfamily)	-	-	-	-	V5FZJ6.1 PF07690.14;MFS_1;
TRINITY_DN10232_c0_g1	573	TRINITY_DN10232_c0_g1_i1;TRINITY_DN10232_c0_g1_i2	-	-	-	-	-	-	-	-	-	-
TRINITY_DN10233_c0_g1	740	TRINITY_DN10233_c0_g1_i1	hypothetical protein GYMLUDRAFT_241550 [Gymnopus luxurians FD-317 M1]	ypt-1	GTP-binding protein ypt1 OS=Neurospora crassa (strain ATCC 24698 / 74-OR23-1A / CBS 708.71 / DSM 1257 / FGSC 987) GN=ypt-1 PE=3 SV=1	GO:0000139(Golgi membrane);GO:0005789(endoplasmic reticulum membrane);GO:0006888(ER to Golgi vesicle-mediated transport)	ENOG410XQN5(member RAS oncogene family)	NA	NA	NA	NA(NA)	A0A015KUY4.1 PF00071.20;Ras;
TRINITY_DN10234_c0_g1	416	TRINITY_DN10234_c0_g1_i1	-	Hsd17b11	Estradiol 17-beta-dehydrogenase 11 OS=Mus musculus GN=Hsd17b11 PE=1 SV=1	GO:0004303(estradiol 17-beta-dehydrogenase activity);GO:0005576(extracellular region);GO:0005737(cytoplasm);GO:0005811(lipid droplet);GO:0006629(lipid metabolic process);GO:0006694(steroid biosynthetic process);GO:0006710(androgen catabolic process);GO:0016229(steroid dehydrogenase activity);GO:0016491(oxidoreductase activity);GO:0016616(oxidoreductase activity, acting on the CH-OH group of donor…	COG1028(Dehydrogenase reductase)	-	-	-	-	Q6AYS8.1 PF00106.23;adh_short;
TRINITY_DN10236_c0_g1	1856	TRINITY_DN10236_c0_g1_i1	hypothetical protein P167DRAFT_533889 [Morchella conica CCBAS932]	SPBC1773.02c	Peroxiredoxin C1773.02c OS=Schizosaccharomyces pombe (strain 972 / ATCC 24843) GN=SPBC1773.02c PE=3 SV=1	GO:0005634(nucleus);GO:0005829(cytosol);GO:0008379(thioredoxin peroxidase activity);GO:0034599(cellular response to oxidative stress);GO:0045454(cell redox homeostasis);GO:0055114(oxidation-reduction process)	COG1225(alkyl hydroperoxide reductase Thiol specific antioxidant Mal allergen)	NA	NA	NA	NA(NA)	D5G400.1 PF00578.19;AhpC-TSA;
TRINITY_DN10236_c0_g2	1473	TRINITY_DN10236_c0_g2_i1	hypothetical protein P167DRAFT_543617 [Morchella conica CCBAS932]	swc4	SWR1-complex protein 4 OS=Neosartorya fumigata (strain ATCC MYA-4609 / Af293 / CBS 101355 / FGSC A1100) GN=swc4 PE=3 SV=1	GO:0000812(Swr1 complex);GO:0003674(molecular_function);GO:0035267(NuA4 histone acetyltransferase complex);GO:0043486(histone exchange)	ENOG410XSA4(DNA methyltransferase 1 associated protein 1)	NA	NA	NA	NA(NA)	D5G3Z9.1 PF16282.3;SANT_DAMP1_like;
TRINITY_DN10238_c0_g1	848	TRINITY_DN10238_c0_g1_i1	hypothetical protein P167DRAFT_542279 [Morchella conica CCBAS932]	SWI2	Switch 2 OS=Arabidopsis thaliana GN=SWI2 PE=3 SV=1	GO:0003676(nucleic acid binding);GO:0003677(DNA binding);GO:0004386(helicase activity);GO:0005524(ATP binding);GO:0005575(cellular_component);GO:0008150(biological_process)	ENOG410XP4Z(excision repair cross-complementing rodent repair deficiency complementation group)	NA	NA	NA	NA(NA)	D5GNB7.1 PF00271.29;Helicase_C;
TRINITY_DN10238_c0_g2	926	TRINITY_DN10238_c0_g2_i1	hypothetical protein P167DRAFT_542279 [Morchella conica CCBAS932]	ERCC6L2	DNA excision repair protein ERCC-6-like 2 OS=Bos taurus GN=ERCC6L2 PE=2 SV=3	GO:0003676(nucleic acid binding);GO:0003677(DNA binding);GO:0004386(helicase activity);GO:0005524(ATP binding);GO:0005575(cellular_component);GO:0008150(biological_process)	ENOG410XP4Z(excision repair cross-complementing rodent repair deficiency complementation group)	NA	NA	NA	NA(NA)	A0A0F7TLL2.1 PF00176.21;SNF2_N;
TRINITY_DN1023_c0_g1	2156	TRINITY_DN1023_c0_g1_i1;TRINITY_DN1023_c0_g1_i2	-	Myot	Myotilin OS=Mus musculus GN=Myot PE=1 SV=1	GO:0003779(actin binding);GO:0005737(cytoplasm);GO:0005856(cytoskeleton);GO:0005886(plasma membrane);GO:0008150(biological_process);GO:0016020(membrane);GO:0030018(Z disc);GO:0051393(alpha-actinin binding)	ENOG410ZZ78(myotilin)	-	-	-	-	G3T7Z5.1 PF07679.14;I-set;
TRINITY_DN10240_c0_g1	1352	TRINITY_DN10240_c0_g1_i1	pheromone alpha factor receptor [Morchella septimelata]	mam2	Pheromone P-factor receptor OS=Schizosaccharomyces pombe (strain 972 / ATCC 24843) GN=mam2 PE=3 SV=1	GO:0000324(fungal-type vacuole);GO:0000750(pheromone-dependent signal transduction involved in conjugation with cellular fusion);GO:0000755(cytogamy);GO:0000909(sporocarp development involved in sexual reproduction);GO:0004934(mating-type alpha-factor pheromone receptor activity);GO:0005550(pheromone binding);GO:0005938(cell cortex);GO:0030031(cell projection assembly);GO:0031139(positive regulat…	ENOG4111SKF(pheromone)	K11213	pheromone alpha factor receptor	-	tml04011(MAPK signaling pathway - yeast)	D5GJK5.1 PF02116.13;STE2;
TRINITY_DN10243_c0_g1	2012	TRINITY_DN10243_c0_g1_i1	anthranilate synthase component [Morchella conica CCBAS932]	TRP2	Anthranilate synthase component 1 OS=Saccharomyces cerevisiae (strain ATCC 204508 / S288c) GN=TRP2 PE=1 SV=4	GO:0000162(tryptophan biosynthetic process);GO:0004049(anthranilate synthase activity);GO:0005634(nucleus);GO:0005829(cytosol);GO:0005950(anthranilate synthase complex);GO:0070791(cleistothecium development)	COG0147(synthase (Component I))	K01657	anthranilate synthase component I	EC:4.1.3.27	tml00400(Phenylalanine, tyrosine and tryptophan biosynthesis);tml00405(Phenazine biosynthesis)	U4L5Z4.1 PF00425.16;Chorismate_bind;
TRINITY_DN10244_c0_g1	262	TRINITY_DN10244_c0_g1_i1	-	-	-	-	-	-	-	-	-	-
TRINITY_DN10245_c0_g1	716	TRINITY_DN10245_c0_g1_i1	hypothetical protein P167DRAFT_604062 [Morchella conica CCBAS932]	-	-	-	-	-	-	-	-	-
TRINITY_DN10247_c0_g1	224	TRINITY_DN10247_c0_g1_i1	lanosterol 14-alpha-demethylase [Lentinula edodes]	CYP51	Eburicol 14-alpha-demethylase OS=Uncinula necator GN=CYP51 PE=2 SV=2	GO:0005783(endoplasmic reticulum);GO:0005886(plasma membrane);GO:0006696(ergosterol biosynthetic process);GO:0008398(sterol 14-demethylase activity)	COG2124(Cytochrome p450)	K05917	sterol 14-demethylase	EC:1.14.13.70	fme00100(Steroid biosynthesis)	A0A067Q776.1 PF00067.20;p450;
TRINITY_DN10248_c0_g1	452	TRINITY_DN10248_c0_g1_i1	-	Lgals1	Galectin-1 OS=Mus musculus GN=Lgals1 PE=1 SV=3	GO:0002317(plasma cell differentiation);GO:0005515(protein binding);GO:0005534(galactose binding);GO:0005576(extracellular region);GO:0005615(extracellular space);GO:0005622(intracellular);GO:0005634(nucleus);GO:0005737(cytoplasm);GO:0005829(cytosol);GO:0006915(apoptotic process);GO:0007157(heterophilic cell-cell adhesion via plasma membrane cell adhesion molecules);GO:0009986(cell surface);GO:00…	ENOG4111EA0(Lectin, galactoside-binding, soluble)	-	-	-	-	P16045.3 PF00337.20;Gal-bind_lectin;
TRINITY_DN10248_c0_g2	443	TRINITY_DN10248_c0_g2_i1	-	LGALS1	Galectin-1 OS=Homo sapiens GN=LGALS1 PE=1 SV=2	GO:0002317(plasma cell differentiation);GO:0005515(protein binding);GO:0005615(extracellular space);GO:0005622(intracellular);GO:0005634(nucleus);GO:0005737(cytoplasm);GO:0005788(endoplasmic reticulum lumen);GO:0006915(apoptotic process);GO:0007165(signal transduction);GO:0009986(cell surface);GO:0010812(negative regulation of cell-substrate adhesion);GO:0010977(negative regulation of neuron proj…	ENOG4111EA0(Lectin, galactoside-binding, soluble)	-	-	-	-	G7PFD7.1 PF00337.20;Gal-bind_lectin;
TRINITY_DN10249_c0_g1	227	TRINITY_DN10249_c0_g1_i1	-	-	-	-	-	-	-	-	-	-
TRINITY_DN10251_c0_g1	832	TRINITY_DN10251_c0_g1_i1	hypothetical protein Glove_332g11 [Diversispora versiformis]	RPS3B	40S ribosomal protein S3-2 OS=Arabidopsis thaliana GN=RPS3B PE=1 SV=1	GO:0003684(damaged DNA binding);GO:0003735(structural constituent of ribosome);GO:0005634(nucleus);GO:0006281(DNA repair);GO:0008534(oxidized purine nucleobase lesion DNA N-glycosylase activity);GO:0022627(cytosolic small ribosomal subunit)	COG0092(Binds the lower part of the 30S subunit head. Binds mRNA in the 70S ribosome, positioning it for translation (By similarity))	K02985	small subunit ribosomal protein S3e	-	scm03010(Ribosome)	A0A078FRB1.1 PF00189.18;Ribosomal_S3_C;
TRINITY_DN10252_c0_g1	207	TRINITY_DN10252_c0_g1_i1	-	-	-	-	-	-	-	-	-	-
TRINITY_DN10252_c1_g1	1579	TRINITY_DN10252_c1_g1_i1	Zinc/iron permease [Morchella conica CCBAS932]	SLC39A9	Zinc transporter ZIP9 OS=Gallus gallus GN=SLC39A9 PE=2 SV=1	GO:0016020(membrane);GO:0030001(metal ion transport);GO:0046873(metal ion transmembrane transporter activity);GO:0055085(transmembrane transport)	ENOG410XQG5(Solute carrier family 39 (Zinc transporter), member 9)	NA	NA	NA	NA(NA)	D5GLJ3.1 PF02535.20;Zip;
TRINITY_DN10253_c0_g1	235	TRINITY_DN10253_c0_g1_i1	-	-	-	-	-	-	-	-	-	-
TRINITY_DN10254_c0_g1	1173	TRINITY_DN10254_c0_g1_i1	Snf7-domain-containing protein [Morchella conica CCBAS932]	VPS24	Vacuolar protein-sorting-associated protein 24 OS=Saccharomyces cerevisiae (strain ATCC 204508 / S288c) GN=VPS24 PE=1 SV=1	GO:0000815(ESCRT III complex);GO:0003674(molecular_function);GO:0005829(cytosol);GO:0030448(hyphal growth);GO:0043328(protein transport to vacuole involved in ubiquitin-dependent protein catabolic process via the multivesicular body sorting pathway);GO:0043936(asexual sporulation resulting in formation of a cellular spore);GO:0070676(intralumenal vesicle formation);GO:0071467(cellular response to…	COG5491(Charged multivesicular body protein)	K12193	charged multivesicular body protein 3	-	tml04144(Endocytosis)	D5GCD0.1 PF03357.19;Snf7;
TRINITY_DN10255_c0_g1	305	TRINITY_DN10255_c0_g1_i1	hypothetical protein LENED_010830 [Lentinula edodes]	-	-	-	ENOG410YIH9(NA)	-	-	-	-	-
TRINITY_DN10255_c0_g2	289	TRINITY_DN10255_c0_g2_i1	hypothetical protein LENED_010830 [Lentinula edodes]	-	-	-	-	-	-	-	-	-
TRINITY_DN10255_c0_g3	511	TRINITY_DN10255_c0_g3_i1	hypothetical protein LENED_010830 [Lentinula edodes]	-	-	-	ENOG410YIH9(NA)	-	-	-	-	-
TRINITY_DN10256_c0_g1	303	TRINITY_DN10256_c0_g1_i1	-	PHKB	Phosphorylase b kinase regulatory subunit beta OS=Oryctolagus cuniculus GN=PHKB PE=1 SV=3	GO:0004689(phosphorylase kinase activity);GO:0005516(calmodulin binding);GO:0005964(phosphorylase kinase complex);GO:0005977(glycogen metabolic process);GO:0006468(protein phosphorylation)	ENOG410XPJZ(phosphorylase kinase)	-	-	-	-	G7Q125.1 PF00723.19;Glyco_hydro_15;
TRINITY_DN10259_c0_g1	1440	TRINITY_DN10259_c0_g1_i1;TRINITY_DN10259_c0_g1_i2	hypothetical protein P167DRAFT_540464 [Morchella conica CCBAS932]	-	-	-	-	-	-	-	-	-
TRINITY_DN10260_c0_g1	275	TRINITY_DN10260_c0_g1_i1	FAT-domain-containing protein [Morchella conica CCBAS932]	tor2	Serine/threonine-protein kinase tor2 OS=Schizosaccharomyces pombe (strain 972 / ATCC 24843) GN=tor2 PE=1 SV=2	GO:0000324(fungal-type vacuole);GO:0000790(nuclear chromatin);GO:0004674(protein serine/threonine kinase activity);GO:0005829(cytosol);GO:0008144(drug binding);GO:0010507(negative regulation of autophagy);GO:0010515(negative regulation of induction of conjugation with cellular fusion);GO:0010972(negative regulation of G2/M transition of mitotic cell cycle);GO:0031931(TORC1 complex);GO:0034064(Tor…	COG5032(phosphatidylinositol kinase activity)	K07203	serine/threonine-protein kinase mTOR	EC:2.7.11.1	tml04138(Autophagy - yeast);tml04136(Autophagy - other eukaryotes);tml04139(Mitophagy - yeast)	-
TRINITY_DN10260_c0_g2	226	TRINITY_DN10260_c0_g2_i1	FAT-domain-containing protein [Morchella conica CCBAS932]	-	-	-	COG5032(phosphatidylinositol kinase activity)	K07203	serine/threonine-protein kinase mTOR	EC:2.7.11.1	tml04138(Autophagy - yeast);tml04136(Autophagy - other eukaryotes);tml04139(Mitophagy - yeast)	-
TRINITY_DN10261_c0_g1	1096	TRINITY_DN10261_c0_g1_i1	ATP-dependent DNA helicase-like protein recQ [Morchella conica CCBAS932]	-	-	GO:0000724(double-strand break repair via homologous recombination);GO:0003677(DNA binding);GO:0005634(nucleus);GO:0005694(chromosome);GO:0005737(cytoplasm);GO:0009378(four-way junction helicase activity);GO:0043140(ATP-dependent 3'-5' DNA helicase activity)	COG0514(atp-dependent dna helicase)	-	-	-	-	-
TRINITY_DN10263_c0_g1	236	TRINITY_DN10263_c0_g1_i1	-	-	-	-	-	-	-	-	-	-
TRINITY_DN10263_c0_g2	225	TRINITY_DN10263_c0_g2_i1	-	-	-	-	-	-	-	-	-	-
TRINITY_DN10264_c0_g1	1694	TRINITY_DN10264_c0_g1_i1	CBF-domain-containing protein [Morchella conica CCBAS932]	SPBC1604.06c	Uncharacterized protein C1604.06c OS=Schizosaccharomyces pombe (strain 972 / ATCC 24843) GN=SPBC1604.06c PE=3 SV=1	GO:0000462(maturation of SSU-rRNA from tricistronic rRNA transcript (SSU-rRNA, 5.8S rRNA, LSU-rRNA));GO:0005730(nucleolus);GO:0030692(Noc4p-Nop14p complex);GO:0032040(small-subunit processome)	ENOG410YJPG(Nucleolar complex associated 4 homolog (S. cerevisiae))	NA	NA	NA	NA(NA)	D5G4A3.1 PF03914.15;CBF;
TRINITY_DN10265_c0_g1	212	TRINITY_DN10265_c0_g1_i1	hypothetical protein T310_1145 [Rasamsonia emersonii CBS 393.64]	-	-	GO:0003674(molecular_function);GO:0005575(cellular_component);GO:0008150(biological_process)	ENOG410XRKK(NA)	-	-	-	-	B8MND7.1 PF05721.11;PhyH;
TRINITY_DN10270_c0_g1	341	TRINITY_DN10270_c0_g1_i1	hypothetical protein LENED_004501 [Lentinula edodes]	-	-	-	-	-	-	-	-	-
TRINITY_DN10271_c0_g1	2792	TRINITY_DN10271_c0_g1_i1	hypothetical protein P167DRAFT_482597 [Morchella conica CCBAS932]	-	-	-	ENOG410ZJAG(NA)	-	-	-	-	D5GAU8.1 PF09733.7;VEFS-Box;
TRINITY_DN10272_c0_g1	262	TRINITY_DN10272_c0_g1_i1	-	-	-	-	-	-	-	-	-	-
TRINITY_DN10272_c0_g2	1950	TRINITY_DN10272_c0_g2_i1;TRINITY_DN10272_c0_g2_i2	hypothetical protein P167DRAFT_572150 [Morchella conica CCBAS932]	MAE1	NAD-dependent malic enzyme, mitochondrial OS=Saccharomyces cerevisiae (strain ATCC 204508 / S288c) GN=MAE1 PE=1 SV=1	GO:0004471(malate dehydrogenase (decarboxylating) (NAD+) activity);GO:0005739(mitochondrion);GO:0005829(cytosol);GO:0006090(pyruvate metabolic process);GO:0006108(malate metabolic process);GO:0006520(cellular amino acid metabolic process);GO:0051287(NAD binding);GO:0055114(oxidation-reduction process)	COG0281(malic enzyme)	K00027	malate dehydrogenase (oxaloacetate-decarboxylating)	EC:1.1.1.38	tml00620(Pyruvate metabolism)	A0A094CRK5.1 PF03949.13;Malic_M;
TRINITY_DN10273_c0_g1	850	TRINITY_DN10273_c0_g1_i1;TRINITY_DN10273_c0_g1_i2	mitochondrial import translocase, subunit Tom22 [Morchella conica CCBAS932]	tom22	Mitochondrial import receptor subunit tom22 OS=Schizosaccharomyces pombe (strain 972 / ATCC 24843) GN=tom22 PE=3 SV=1	GO:0005742(mitochondrial outer membrane translocase complex);GO:0030150(protein import into mitochondrial matrix);GO:0031307(integral component of mitochondrial outer membrane);GO:0045040(protein import into mitochondrial outer membrane)	ENOG41122K3(mitochondrial import receptor subunit TOM22)	NA	NA	NA	NA(NA)	G1WYW5.1 PF04281.11;Tom22;
TRINITY_DN10274_c0_g1	551	TRINITY_DN10274_c0_g1_i1	hypothetical protein P167DRAFT_549726 [Morchella conica CCBAS932]	-	-	-	-	-	-	-	-	-
TRINITY_DN10274_c0_g2	565	TRINITY_DN10274_c0_g2_i1	hypothetical protein P167DRAFT_549726 [Morchella conica CCBAS932]	-	-	-	-	-	-	-	-	-
TRINITY_DN10274_c0_g3	328	TRINITY_DN10274_c0_g3_i1	-	-	-	-	-	-	-	-	-	-
TRINITY_DN10274_c0_g4	209	TRINITY_DN10274_c0_g4_i1	-	-	-	-	-	-	-	-	-	-
TRINITY_DN10274_c0_g5	945	TRINITY_DN10274_c0_g5_i1	hypothetical protein P167DRAFT_549726 [Morchella conica CCBAS932]	-	-	-	-	-	-	-	-	-
TRINITY_DN10274_c0_g6	725	TRINITY_DN10274_c0_g6_i1;TRINITY_DN10274_c0_g6_i2	-	-	-	-	-	-	-	-	-	-
TRINITY_DN10276_c0_g1	630	TRINITY_DN10276_c0_g1_i1	-	-	-	-	-	-	-	-	-	-
TRINITY_DN10276_c0_g2	669	TRINITY_DN10276_c0_g2_i1	-	-	-	-	-	-	-	-	-	-
TRINITY_DN10278_c0_g1	558	TRINITY_DN10278_c0_g1_i1	hypothetical protein P167DRAFT_539714 [Morchella conica CCBAS932]	-	-	-	-	-	-	-	-	-
TRINITY_DN10279_c0_g1	590	TRINITY_DN10279_c0_g1_i1;TRINITY_DN10279_c0_g1_i2	-	-	-	-	-	-	-	-	-	-
TRINITY_DN1027_c0_g1	246	TRINITY_DN1027_c0_g1_i1	-	Ech1	Delta(3,5)-Delta(2,4)-dienoyl-CoA isomerase, mitochondrial OS=Mus musculus GN=Ech1 PE=1 SV=1	GO:0003824(catalytic activity);GO:0005102(receptor binding);GO:0005739(mitochondrion);GO:0005777(peroxisome);GO:0006629(lipid metabolic process);GO:0006631(fatty acid metabolic process);GO:0008152(metabolic process);GO:0016853(isomerase activity);GO:0051750(delta3,5-delta2,4-dienoyl-CoA isomerase activity)	ENOG410XTHX(Enoyl-CoA hydratase)	-	-	-	-	-
TRINITY_DN10280_c0_g1	888	TRINITY_DN10280_c0_g1_i1	hypothetical protein P167DRAFT_521810 [Morchella conica CCBAS932]	-	-	-	ENOG410YHNG(NA)	-	-	-	-	C5FJV5.1 PF13391.4;HNH_2;
TRINITY_DN10286_c0_g1	320	TRINITY_DN10286_c0_g1_i1	-	-	-	-	-	-	-	-	-	-
TRINITY_DN1028_c0_g1	225	TRINITY_DN1028_c0_g1_i1	-	PFDN6	Prefoldin subunit 6 OS=Bos taurus GN=PFDN6 PE=2 SV=1	GO:0005737(cytoplasm);GO:0005829(cytosol);GO:0006457(protein folding);GO:0016272(prefoldin complex);GO:0051082(unfolded protein binding);GO:0051086(chaperone mediated protein folding independent of cofactor);GO:0051087(chaperone binding);GO:0051131(chaperone-mediated protein complex assembly)	COG1382(Molecular chaperone capable of stabilizing a range of proteins. Seems to fulfill an ATP-independent, HSP70-like function in archaeal de novo protein folding (By similarity))	-	-	-	-	G1SZJ5.1 PF01920.18;Prefoldin_2;
TRINITY_DN10290_c0_g1	630	TRINITY_DN10290_c0_g1_i1	-	-	-	-	-	-	-	-	-	-
TRINITY_DN10290_c1_g1	331	TRINITY_DN10290_c1_g1_i1	-	-	-	-	-	-	-	-	-	-
TRINITY_DN10290_c1_g2	313	TRINITY_DN10290_c1_g2_i1	-	-	-	-	-	-	-	-	-	-
TRINITY_DN10291_c0_g1	752	TRINITY_DN10291_c0_g1_i1	-	-	-	-	-	-	-	-	-	-
TRINITY_DN10292_c0_g1	356	TRINITY_DN10292_c0_g1_i1	Fum1p [Malassezia vespertilionis]	Fh	Fumarate hydratase, mitochondrial OS=Mus musculus GN=Fh PE=1 SV=3	GO:0003824(catalytic activity);GO:0004333(fumarate hydratase activity);GO:0005737(cytoplasm);GO:0005739(mitochondrion);GO:0006099(tricarboxylic acid cycle);GO:0006106(fumarate metabolic process);GO:0006108(malate metabolic process);GO:0016829(lyase activity);GO:0045239(tricarboxylic acid cycle enzyme complex);GO:0048873(homeostasis of number of cells within a tissue)	COG0114(fumarate hydratase class II)	K01679	fumarate hydratase, class II	EC:4.2.1.2	mgl00020(Citrate cycle (TCA cycle));mgl00620(Pyruvate metabolism)	G7NWM4.1 PF00206.18;Lyase_1;
TRINITY_DN10293_c0_g1	923	TRINITY_DN10293_c0_g1_i1	-	-	-	-	-	-	-	-	-	-
TRINITY_DN10295_c0_g1	2413	TRINITY_DN10295_c0_g1_i1	potassium uptake protein [Morchella conica CCBAS932]	HAK19	Potassium transporter 19 OS=Oryza sativa subsp. japonica GN=HAK19 PE=2 SV=1	GO:0015079(potassium ion transmembrane transporter activity);GO:0016020(membrane)	COG3158(Transport of potassium into the cell (By similarity))	NA	NA	NA	NA(NA)	G2XPX5.1 PF02705.14;K_trans;
TRINITY_DN10296_c0_g1	209	TRINITY_DN10296_c0_g1_i1	hypothetical protein P167DRAFT_525200 [Morchella conica CCBAS932]	-	-	-	COG5219(listerin E3 ubiquitin protein ligase 1)	NA	NA	NA	NA(NA)	-
TRINITY_DN10297_c0_g1	594	TRINITY_DN10297_c0_g1_i1	cell division control GTP binding protein [Lentinula edodes]	CDC3	Cell division control protein 3 OS=Candida albicans GN=CDC3 PE=3 SV=1	GO:0000131(incipient cellular bud site);GO:0000144(cellular bud neck septin ring);GO:0000166(nucleotide binding);GO:0000281(mitotic cytokinesis);GO:0000910(cytokinesis);GO:0000921(septin ring assembly);GO:0001400(mating projection base);GO:0001411(hyphal tip);GO:0005198(structural molecule activity);GO:0005525(GTP binding);GO:0005619(ascospore wall);GO:0005628(prospore membrane);GO:0005634(nucleu…	COG5019(Cell division control protein)	NA	NA	NA	NA(NA)	F8PF31.1 PF00735.16;Septin;
TRINITY_DN10298_c0_g1	359	TRINITY_DN10298_c0_g1_i1	citrate synthase [Lentinula edodes]	cs	Citrate synthase, mitochondrial OS=Danio rerio GN=cs PE=2 SV=1	GO:0004108(citrate (Si)-synthase activity);GO:0005759(mitochondrial matrix);GO:0005975(carbohydrate metabolic process)	COG0372(citrate synthase)	K01647	citrate synthase	EC:2.3.3.1	mrr00020(Citrate cycle (TCA cycle));mrr00630(Glyoxylate and dicarboxylate metabolism)	S7Q433.1 PF00285.19;Citrate_synt;
TRINITY_DN10298_c0_g3	271	TRINITY_DN10298_c0_g3_i1	citrate synthase [Lentinula edodes]	cit-1	Citrate synthase, mitochondrial OS=Neurospora crassa (strain ATCC 24698 / 74-OR23-1A / CBS 708.71 / DSM 1257 / FGSC 987) GN=cit-1 PE=2 SV=2	GO:0004108(citrate (Si)-synthase activity);GO:0005739(mitochondrion);GO:0006099(tricarboxylic acid cycle);GO:0009514(glyoxysome);GO:0044262(cellular carbohydrate metabolic process);GO:0046356(acetyl-CoA catabolic process)	COG0372(citrate synthase)	K01647	citrate synthase	EC:2.3.3.1	mrr00020(Citrate cycle (TCA cycle));mrr00630(Glyoxylate and dicarboxylate metabolism)	-
TRINITY_DN1029_c0_g1	267	TRINITY_DN1029_c0_g1_i1	-	-	-	-	-	-	-	-	-	-
TRINITY_DN102_c0_g1	311	TRINITY_DN102_c0_g1_i1	-	-	-	-	-	-	-	-	-	-
TRINITY_DN10301_c0_g1	371	TRINITY_DN10301_c0_g1_i1	-	-	-	-	-	-	-	-	-	-
TRINITY_DN10301_c0_g2	605	TRINITY_DN10301_c0_g2_i1	-	-	-	-	-	-	-	-	-	-
TRINITY_DN10303_c0_g2	217	TRINITY_DN10303_c0_g2_i1	-	-	-	-	-	-	-	-	-	-
TRINITY_DN10303_c0_g3	338	TRINITY_DN10303_c0_g3_i1	-	-	-	-	-	-	-	-	-	-
TRINITY_DN10304_c0_g1	1448	TRINITY_DN10304_c0_g1_i1	CRAL/TRIO domain-containing protein [Morchella conica CCBAS932]	SPCC23B6.04c	CRAL-TRIO domain-containing protein C23B6.04c OS=Schizosaccharomyces pombe (strain 972 / ATCC 24843) GN=SPCC23B6.04c PE=1 SV=1	GO:0005628(prospore membrane);GO:0005886(plasma membrane);GO:0008526(phosphatidylinositol transporter activity);GO:0045332(phospholipid translocation)	ENOG410Y3Q0(CRAL TRIO domain protein)	-	-	-	-	K1Y367.1 PF00650.18;CRAL_TRIO;
TRINITY_DN10305_c0_g2	718	TRINITY_DN10305_c0_g2_i1	hypothetical protein MPH_05444 [Macrophomina phaseolina MS6]	-	-	GO:0003674(molecular_function);GO:0005575(cellular_component);GO:0008150(biological_process)	COG4295(conserved hypothetical protein)	-	-	-	-	C7ZHW8.1 PF10021.7;DUF2263;
TRINITY_DN10305_c0_g3	664	TRINITY_DN10305_c0_g3_i1	-	-	-	-	-	-	-	-	-	-
TRINITY_DN10306_c0_g1	226	TRINITY_DN10306_c0_g1_i1	-	-	-	-	-	-	-	-	-	-
TRINITY_DN10306_c0_g2	2323	TRINITY_DN10306_c0_g2_i1	kinase-like protein [Morchella conica CCBAS932]	-	Serine/threonine-protein kinase SRPK OS=Physarum polycephalum PE=1 SV=1	GO:0005575(cellular_component)	ENOG410XRBH(SRSF protein kinase)	NA	NA	NA	NA(NA)	C5GB24.1 PF00069.23;Pkinase;
TRINITY_DN10307_c0_g1	325	TRINITY_DN10307_c0_g1_i1	-	-	-	-	-	-	-	-	-	-
TRINITY_DN10309_c0_g1	419	TRINITY_DN10309_c0_g1_i1	hypothetical protein P167DRAFT_483555 [Morchella conica CCBAS932]	-	-	GO:0003674(molecular_function);GO:0005575(cellular_component);GO:0008150(biological_process)	ENOG410Y295(Peptidase inhibitor I78 family)	NA	NA	NA	NA(NA)	D5GNP7.1 PF11720.6;Inhibitor_I78;
TRINITY_DN10311_c0_g1	457	TRINITY_DN10311_c0_g1_i1	hypothetical protein LENED_003485 [Lentinula edodes]	-	-	-	ENOG4110C35(NA)	-	-	-	-	-
TRINITY_DN10314_c0_g1	292	TRINITY_DN10314_c0_g1_i1	f1 atpase assembly protein 11 [Lentinula edodes]	-	-	-	-	NA	NA	NA	NA(NA)	-
TRINITY_DN10315_c0_g1	1231	TRINITY_DN10315_c0_g1_i1;TRINITY_DN10315_c0_g1_i2;TRINITY_DN10315_c0_g1_i3;TRINITY_DN10315_c0_g1_i4	-	-	-	-	-	-	-	-	-	-
TRINITY_DN10317_c0_g1	222	TRINITY_DN10317_c0_g1_i1	-	RCN1	Reticulocalbin-1 OS=Homo sapiens GN=RCN1 PE=1 SV=1	GO:0001701(in utero embryonic development);GO:0005509(calcium ion binding);GO:0005783(endoplasmic reticulum);GO:0043010(camera-type eye development)	ENOG410XRVE(EF-hand calcium binding domain)	-	-	-	-	D3ZUB0.1 PF13202.4;EF-hand_5;
TRINITY_DN10318_c0_g1	258	TRINITY_DN10318_c0_g1_i1	laccase 3 VT [Lentinula edodes]	POX2	Laccase-2 OS=Pleurotus ostreatus GN=POX2 PE=1 SV=1	GO:0005507(copper ion binding);GO:0005576(extracellular region);GO:0016491(oxidoreductase activity);GO:0046274(lignin catabolic process)	COG2132(Multicopper oxidase)	NA	NA	NA	NA(NA)	V2X2V9.1 PF07731.12;Cu-oxidase_2;
TRINITY_DN10319_c0_g1	579	TRINITY_DN10319_c0_g1_i1	-	-	-	-	-	-	-	-	-	-
TRINITY_DN10320_c0_g1	661	TRINITY_DN10320_c0_g1_i1;TRINITY_DN10320_c0_g1_i2	tubulin binding cofactor A [Morchella conica CCBAS932]	-	-	GO:0005622(intracellular);GO:0005874(microtubule);GO:0007021(tubulin complex assembly);GO:0007023(post-chaperonin tubulin folding pathway);GO:0048487(beta-tubulin binding);GO:0051082(unfolded protein binding)	ENOG41122E4(Tubulin binding cofactor A)	NA	NA	NA	NA(NA)	R1GL09.1 PF02970.14;TBCA;
TRINITY_DN10320_c0_g2	999	TRINITY_DN10320_c0_g2_i1	60S ribosomal protein L19 [Morchella conica CCBAS932]	RPL19A	60S ribosomal protein L19-A OS=Saccharomyces cerevisiae (strain ATCC 204508 / S288c) GN=RPL19A PE=1 SV=1	GO:0003735(structural constituent of ribosome);GO:0006412(translation);GO:0022625(cytosolic large ribosomal subunit)	COG2147(ribosomal protein L19)	K02885	large subunit ribosomal protein L19e	-	tml03010(Ribosome)	U4LR79.1 PF01280.18;Ribosomal_L19e;
TRINITY_DN10321_c0_g1	1153	TRINITY_DN10321_c0_g1_i1;TRINITY_DN10321_c0_g1_i2	hypothetical protein CFD26_100455 [Aspergillus turcosus]	-	-	-	-	-	-	-	-	-
TRINITY_DN10322_c0_g1	241	TRINITY_DN10322_c0_g1_i1	-	-	-	-	-	-	-	-	-	-
TRINITY_DN10325_c0_g1	474	TRINITY_DN10325_c0_g1_i1	DUF1909-domain-containing protein [Rhizoclosmatium globosum]	At2g23090	Uncharacterized protein At2g23090 OS=Arabidopsis thaliana GN=At2g23090 PE=1 SV=1	GO:0003674(molecular_function);GO:0008150(biological_process)	ENOG411250G(4F5 protein family)	-	-	-	-	B9HMX2.1 PF12907.5;zf-met2;
TRINITY_DN10326_c0_g1	214	TRINITY_DN10326_c0_g1_i1	hypothetical protein P167DRAFT_607788 [Morchella conica CCBAS932]	-	-	GO:0003674(molecular_function);GO:0005730(nucleolus);GO:0008150(biological_process)	ENOG410XSRE(UTP20, small subunit (SSU) processome component, homolog (yeast))	NA	NA	NA	NA(NA)	-
TRINITY_DN10328_c0_g1	1387	TRINITY_DN10328_c0_g1_i1	mitochondrial carrier [Morchella conica CCBAS932]	YMR166C	Uncharacterized mitochondrial carrier YMR166C OS=Saccharomyces cerevisiae (strain ATCC 204508 / S288c) GN=YMR166C PE=1 SV=1	GO:0005743(mitochondrial inner membrane);GO:0015095(magnesium ion transmembrane transporter activity);GO:1990616(magnesium ion export from mitochondrion)	ENOG410XQ00(mitochondrial carrier protein)	NA	NA	NA	NA(NA)	D5G5C6.1 PF00153.25;Mito_carr;
TRINITY_DN10328_c0_g2	353	TRINITY_DN10328_c0_g2_i1	-	-	-	-	-	-	-	-	-	-
TRINITY_DN10331_c0_g1	2558	TRINITY_DN10331_c0_g1_i1	hypothetical protein P167DRAFT_516139 [Morchella conica CCBAS932]	rsc9	Chromatin structure-remodeling complex subunit rsc9 OS=Schizosaccharomyces pombe (strain 972 / ATCC 24843) GN=rsc9 PE=1 SV=1	GO:0003674(molecular_function);GO:0005829(cytosol);GO:0008150(biological_process);GO:0016586(RSC-type complex)	ENOG410ZQQZ(complex subunit (Rsc9))	NA	NA	NA	NA(NA)	-
TRINITY_DN10332_c0_g1	1451	TRINITY_DN10332_c0_g1_i1	hypothetical protein P167DRAFT_485703 [Morchella conica CCBAS932]	sre1	Elongation of fatty acids protein sre1 OS=Dictyostelium discoideum GN=sre1 PE=2 SV=1	GO:0003674(molecular_function);GO:0008150(biological_process);GO:0016021(integral component of membrane)	ENOG410Z3FZ(fatty acid elongase)	-	-	-	-	D5GJG4.1 PF01151.16;ELO;
TRINITY_DN10332_c0_g2	2609	TRINITY_DN10332_c0_g2_i1	hypothetical protein P167DRAFT_577639 [Morchella conica CCBAS932]	-	-	GO:0003674(molecular_function);GO:0005575(cellular_component);GO:0008150(biological_process)	ENOG4111I1A(conserved hypothetical protein)	NA	NA	NA	NA(NA)	M5BP19.1 PF00092.26;VWA;
TRINITY_DN10333_c0_g1	324	TRINITY_DN10333_c0_g1_i1	hypothetical protein P167DRAFT_372917 [Morchella conica CCBAS932]	-	-	-	-	-	-	-	-	-
TRINITY_DN10334_c0_g1	2459	TRINITY_DN10334_c0_g1_i1	hypothetical protein P167DRAFT_604366 [Morchella conica CCBAS932]	ARB_01230	Kelch repeat-containing protein ARB_01230 OS=Arthroderma benhamiae (strain ATCC MYA-4681 / CBS 112371) GN=ARB_01230 PE=1 SV=1	GO:0003674(molecular_function);GO:0005575(cellular_component);GO:0008150(biological_process)	ENOG410YCU4(Kelch repeat protein)	-	-	-	-	W7I751.1 PF13854.4;Kelch_5;
TRINITY_DN10334_c0_g2	1970	TRINITY_DN10334_c0_g2_i1	cyclin-like protein [Morchella conica CCBAS932]	sua7	Transcription initiation factor IIB OS=Schizosaccharomyces pombe (strain 972 / ATCC 24843) GN=sua7 PE=3 SV=1	GO:0005634(nucleus);GO:0006367(transcription initiation from RNA polymerase II promoter);GO:0008270(zinc ion binding);GO:0017025(TBP-class protein binding);GO:0045899(positive regulation of RNA polymerase II transcriptional preinitiation complex assembly);GO:0070897(DNA-templated transcriptional preinitiation complex assembly)	COG1405(Stabilizes TBP binding to an archaeal box-A promoter. Also responsible for recruiting RNA polymerase II to the pre- initiation complex (DNA-TBP-TFIIB) (By similarity))	K03124	transcription initiation factor TFIIB	-	tml03022(Basal transcription factors)	D5GH70.1 PF00382.17;TFIIB;
TRINITY_DN10335_c0_g1	605	TRINITY_DN10335_c0_g1_i1	-	-	-	-	-	-	-	-	-	-
TRINITY_DN10335_c1_g1	945	TRINITY_DN10335_c1_g1_i1	-	-	-	-	-	-	-	-	-	-
TRINITY_DN10336_c0_g1	361	TRINITY_DN10336_c0_g1_i1	NADH dehydrogenase (ubiquinone) 1 alpha subcomplex 5 [Rhizoctonia solani AG-1 IB]	Ndufa5	NADH dehydrogenase [ubiquinone] 1 alpha subcomplex subunit 5 OS=Mus musculus GN=Ndufa5 PE=1 SV=3	GO:0005739(mitochondrion);GO:0005743(mitochondrial inner membrane);GO:0005747(mitochondrial respiratory chain complex I);GO:0008137(NADH dehydrogenase (ubiquinone) activity);GO:0016020(membrane);GO:0016651(oxidoreductase activity, acting on NAD(P)H);GO:0022904(respiratory electron transport chain);GO:0032981(mitochondrial respiratory chain complex I assembly);GO:0045271(respiratory chain complex …	ENOG4111V89(NADH dehydrogenase (Ubiquinone) 1 alpha subcomplex)	K03949	NADH dehydrogenase (ubiquinone) 1 alpha subcomplex subunit 5	-	sla00190(Oxidative phosphorylation)	W5PNX7.1 PF04716.12;ETC_C1_NDUFA5;
TRINITY_DN10340_c0_g1	2887	TRINITY_DN10340_c0_g1_i1	hypothetical protein P167DRAFT_161106 [Morchella conica CCBAS932]	-	-	-	-	-	-	-	-	-
TRINITY_DN10341_c0_g1	2292	TRINITY_DN10341_c0_g1_i1	hypothetical protein P167DRAFT_555690 [Morchella conica CCBAS932]	NSP1	Nucleoporin NSP1 OS=Chaetomium thermophilum (strain DSM 1495 / CBS 144.50 / IMI 039719) GN=NSP1 PE=1 SV=1	GO:0008150(biological_process)	ENOG410XT5X(nucleoporin)	K14306	nuclear pore complex protein Nup62	-	tml03013(RNA transport)	D5GKM5.1 PF05064.11;Nsp1_C;
TRINITY_DN10341_c0_g2	316	TRINITY_DN10341_c0_g2_i1	-	-	-	-	-	-	-	-	-	-
TRINITY_DN10342_c0_g1	1124	TRINITY_DN10342_c0_g1_i1	Pre-mRNA-splicing factor syf2 [Morchella importuna]	syf2	Pre-mRNA-splicing factor syf2 OS=Emericella nidulans (strain FGSC A4 / ATCC 38163 / CBS 112.46 / NRRL 194 / M139) GN=syf2 PE=3 SV=1	GO:0000974(Prp19 complex);GO:0003674(molecular_function);GO:0008150(biological_process);GO:0071014(post-mRNA release spliceosomal complex)	ENOG410XY86(SYF2 homolog, RNA splicing factor (S. cerevisiae))	K12868	pre-mRNA-splicing factor SYF2	-	tml03040(Spliceosome)	D5G869.1 PF08231.10;SYF2;
TRINITY_DN10343_c0_g1	230	TRINITY_DN10343_c0_g1_i1	-	-	-	-	-	-	-	-	-	-
TRINITY_DN10343_c0_g2	344	TRINITY_DN10343_c0_g2_i1	-	-	-	-	-	-	-	-	-	-
TRINITY_DN10345_c0_g1	2139	TRINITY_DN10345_c0_g1_i1	ankyrin, partial [Morchella conica CCBAS932]	-	-	-	-	-	-	-	-	-
TRINITY_DN10345_c0_g2	459	TRINITY_DN10345_c0_g2_i1	-	-	-	-	-	-	-	-	-	-
TRINITY_DN10346_c0_g1	1240	TRINITY_DN10346_c0_g1_i1;TRINITY_DN10346_c0_g1_i2	hypothetical protein P167DRAFT_609532 [Morchella conica CCBAS932]	NNT1	Protein N-methyltransferase NNT1 OS=Cryptococcus neoformans var. neoformans serotype D (strain B-3501A) GN=NNT1 PE=3 SV=1	GO:0003674(molecular_function);GO:0005575(cellular_component);GO:0008150(biological_process)	ENOG4111NE8(histidine protein methyltransferase 1 homolog)	NA	NA	NA	NA(NA)	D5G4M4.1 PF10294.7;Methyltransf_16;
TRINITY_DN10347_c0_g1	256	TRINITY_DN10347_c0_g1_i1	-	-	-	-	-	-	-	-	-	-
TRINITY_DN10347_c0_g2	1115	TRINITY_DN10347_c0_g2_i1	hypothetical protein P167DRAFT_308736 [Morchella conica CCBAS932]	-	-	-	-	-	-	-	-	-
TRINITY_DN10349_c0_g1	833	TRINITY_DN10349_c0_g1_i1;TRINITY_DN10349_c0_g1_i2;TRINITY_DN10349_c0_g1_i3	hypothetical protein C7212DRAFT_297530 [Tuber magnatum]	SPCC1494.09c	Uncharacterized protein C1494.09c OS=Schizosaccharomyces pombe (strain 972 / ATCC 24843) GN=SPCC1494.09c PE=4 SV=1	GO:0003674(molecular_function);GO:0005575(cellular_component);GO:0008150(biological_process)	ENOG410Y8AA(Conserved hypothetical, protein)	-	-	-	-	R7Z498.1 PF17110.3;TFB6;
TRINITY_DN1034_c0_g1	319	TRINITY_DN1034_c0_g1_i1	hypothetical protein P167DRAFT_543754 [Morchella conica CCBAS932]	-	-	-	-	-	-	-	-	-
TRINITY_DN10350_c0_g1	216	TRINITY_DN10350_c0_g1_i1	-	-	-	-	-	-	-	-	-	-
TRINITY_DN10353_c0_g1	2314	TRINITY_DN10353_c0_g1_i1	hypothetical protein P167DRAFT_547837 [Morchella conica CCBAS932]	At3g54460	F-box protein At3g54460 OS=Arabidopsis thaliana GN=At3g54460 PE=2 SV=1	GO:0003676(nucleic acid binding);GO:0003677(DNA binding);GO:0004386(helicase activity);GO:0005524(ATP binding);GO:0005575(cellular_component);GO:0008150(biological_process)	ENOG410XQ0U(SNF2 family helicase)	NA	NA	NA	NA(NA)	U4LS17.1 PF00176.21;SNF2_N;
TRINITY_DN10354_c0_g2	2997	TRINITY_DN10354_c0_g2_i1;TRINITY_DN10354_c0_g2_i2	DEAD-domain-containing protein [Morchella conica CCBAS932]	dbp10	ATP-dependent RNA helicase dbp10 OS=Sclerotinia sclerotiorum (strain ATCC 18683 / 1980 / Ss-1) GN=dbp10 PE=3 SV=2	GO:0004004(ATP-dependent RNA helicase activity);GO:0010501(RNA secondary structure unwinding)	ENOG410XQE5(atp-dependent rna helicase)	NA	NA	NA	NA(NA)	U4LCJ2.1 PF00270.27;DEAD;
TRINITY_DN10354_c0_g3	2069	TRINITY_DN10354_c0_g3_i1	actin-like ATPase domain-containing protein [Morchella conica CCBAS932]	HSPA12A	Heat shock 70 kDa protein 12A OS=Homo sapiens GN=HSPA12A PE=1 SV=2	GO:0003674(molecular_function);GO:0005575(cellular_component);GO:0008150(biological_process)	COG0443(Heat shock protein)	NA	NA	NA	NA(NA)	D5GMQ0.1 PF00012.18;HSP70;
TRINITY_DN10355_c0_g1	499	TRINITY_DN10355_c0_g1_i1	-	-	-	-	-	-	-	-	-	-
TRINITY_DN10355_c0_g2	284	TRINITY_DN10355_c0_g2_i1	-	-	-	-	-	-	-	-	-	-
TRINITY_DN10355_c0_g3	303	TRINITY_DN10355_c0_g3_i1	-	-	-	-	-	-	-	-	-	-
TRINITY_DN10356_c0_g1	453	TRINITY_DN10356_c0_g1_i1	-	-	-	-	-	-	-	-	-	-
TRINITY_DN10356_c0_g2	1279	TRINITY_DN10356_c0_g2_i1	ubiquitin-related domain-containing protein [Tuber borchii]	UBI1	Polyubiquitin OS=Candida albicans GN=UBI1 PE=1 SV=1	GO:0003674(molecular_function);GO:0005575(cellular_component);GO:0008150(biological_process)	COG3582(An1-type zinc finger protein)	NA	NA	NA	NA(NA)	D2W1S7.1 PF00240.21;ubiquitin;
TRINITY_DN10356_c0_g3	246	TRINITY_DN10356_c0_g3_i1	-	-	-	-	-	-	-	-	-	-
TRINITY_DN10357_c0_g1	226	TRINITY_DN10357_c0_g1_i1	hypothetical protein P167DRAFT_573808 [Morchella conica CCBAS932]	-	-	GO:0004842(ubiquitin-protein transferase activity);GO:0005634(nucleus);GO:0006464(cellular protein modification process)	COG5021(ubiquitin protein ligase)	K10592	E3 ubiquitin-protein ligase HUWE1	EC:2.3.2.26	tml04120(Ubiquitin mediated proteolysis)	-
TRINITY_DN10357_c0_g2	6199	TRINITY_DN10357_c0_g2_i1	hypothetical protein P167DRAFT_573808 [Morchella conica CCBAS932]	B11B22.010	E3 ubiquitin-protein ligase TOM1-like OS=Neurospora crassa (strain ATCC 24698 / 74-OR23-1A / CBS 708.71 / DSM 1257 / FGSC 987) GN=B11B22.010 PE=3 SV=4	GO:0004842(ubiquitin-protein transferase activity);GO:0005634(nucleus);GO:0006464(cellular protein modification process)	COG5021(ubiquitin protein ligase)	K10592	E3 ubiquitin-protein ligase HUWE1	EC:2.3.2.26	tml04120(Ubiquitin mediated proteolysis)	D5G4Z8.1 PF00632.23;HECT;
TRINITY_DN10358_c0_g1	1001	TRINITY_DN10358_c0_g1_i1;TRINITY_DN10358_c0_g1_i2	Similar to hypothetical protein [Tuber melanosporum Mel28]; acc. no. XP_002841103 [Pyronema omphalodes CBS 100304]	-	-	-	-	-	-	-	-	-
TRINITY_DN10359_c0_g1	407	TRINITY_DN10359_c0_g1_i1	delta 5 fatty acid desaturase [Lentinula edodes]	DDB_G0294553	Probable Delta(5) fatty acid desaturase C OS=Dictyostelium discoideum GN=DDB_G0294553 PE=3 SV=1	GO:0006629(lipid metabolic process);GO:0006631(fatty acid metabolic process);GO:0006633(fatty acid biosynthetic process);GO:0016020(membrane);GO:0016021(integral component of membrane);GO:0016491(oxidoreductase activity);GO:0020037(heme binding);GO:0046872(metal ion binding);GO:0055114(oxidation-reduction process)	ENOG410XVSZ(Fatty acid desaturase)	K00101	L-lactate dehydrogenase (cytochrome)	EC:1.1.2.3	nhe00620(Pyruvate metabolism)	D3BMF1.1 PF00173.26;Cyt-b5;
TRINITY_DN10359_c0_g2	215	TRINITY_DN10359_c0_g2_i1	delta 5 fatty acid desaturase [Lentinula edodes]	DES1	Acyl-lipid (8-3)-desaturase OS=Mortierella alpina GN=DES1 PE=1 SV=1	GO:0006629(lipid metabolic process);GO:0006631(fatty acid metabolic process);GO:0006633(fatty acid biosynthetic process);GO:0016020(membrane);GO:0016021(integral component of membrane);GO:0016491(oxidoreductase activity);GO:0020037(heme binding);GO:0046872(metal ion binding);GO:0055114(oxidation-reduction process)	COG5274(cytochrome b5);ENOG410XVSZ(Fatty acid desaturase)	-	-	-	-	U9TEK7.1 PF00487.22;FA_desaturase;
TRINITY_DN1035_c0_g1	238	TRINITY_DN1035_c0_g1_i1	aldose 1-epimerase [Neocallimastix californiae]	Galm	Aldose 1-epimerase OS=Rattus norvegicus GN=Galm PE=1 SV=1	GO:0004034(aldose 1-epimerase activity);GO:0005737(cytoplasm);GO:0006006(glucose metabolic process);GO:0006012(galactose metabolic process);GO:0030246(carbohydrate binding)	COG2017(converts alpha-aldose to the beta-anomer. It is active on D-glucose, L-arabinose, D-xylose, D-galactose, maltose and lactose (By similarity))	-	-	-	-	A0A0A0LG24.1 PF01263.18;Aldose_epim;
TRINITY_DN10361_c0_g1	235	TRINITY_DN10361_c0_g1_i1	-	-	-	-	-	-	-	-	-	-
TRINITY_DN10361_c0_g2	2802	TRINITY_DN10361_c0_g2_i1;TRINITY_DN10361_c0_g2_i2	hypothetical protein P167DRAFT_469911, partial [Morchella conica CCBAS932]	-	-	-	ENOG4112AX0(SMP-30/Gluconolaconase/LRE-like region)	-	-	-	-	D5G802.1 PF08450.10;SGL;
TRINITY_DN10362_c0_g1	2080	TRINITY_DN10362_c0_g1_i1	hypothetical protein P167DRAFT_603780 [Morchella conica CCBAS932]	glkA	Glucokinase OS=Aspergillus niger GN=glkA PE=1 SV=1	GO:0001678(cellular glucose homeostasis);GO:0004340(glucokinase activity);GO:0005829(cytosol);GO:0006096(glycolytic process);GO:0008865(fructokinase activity);GO:0019158(mannokinase activity)	COG5026(hexokinase)	K00844	hexokinase	EC:2.7.1.1	pno00010(Glycolysis / Gluconeogenesis);pno00051(Fructose and mannose metabolism);pno00052(Galactose metabolism);pno00500(Starch and sucrose metabolism);pno00520(Amino sugar and nucleotide sugar metabolism);pno00524(Neomycin, kanamycin and gentamicin biosynthesis)	U4LXW2.1 PF03727.14;Hexokinase_2;
TRINITY_DN10362_c0_g2	1247	TRINITY_DN10362_c0_g2_i1	hypothetical protein P167DRAFT_603780 [Morchella conica CCBAS932]	-	-	-	-	-	-	-	-	-
TRINITY_DN10362_c0_g3	533	TRINITY_DN10362_c0_g3_i1	hypothetical protein P167DRAFT_603780 [Morchella conica CCBAS932]	glkA	Glucokinase OS=Aspergillus niger GN=glkA PE=1 SV=1	GO:0001678(cellular glucose homeostasis);GO:0004340(glucokinase activity);GO:0005829(cytosol);GO:0006096(glycolytic process);GO:0008865(fructokinase activity);GO:0019158(mannokinase activity)	COG5026(hexokinase)	K00844	hexokinase	EC:2.7.1.1	cthr00010(Glycolysis / Gluconeogenesis);cthr00051(Fructose and mannose metabolism);cthr00052(Galactose metabolism);cthr00500(Starch and sucrose metabolism);cthr00520(Amino sugar and nucleotide sugar metabolism);cthr00524(Neomycin, kanamycin and gentamicin biosynthesis)	U4LXW2.1 PF00349.19;Hexokinase_1;
TRINITY_DN10364_c0_g1	300	TRINITY_DN10364_c0_g1_i1	uncharacterized protein ARMOST_10158 [Armillaria ostoyae]	hhfA	Histone H4 OS=Agaricus bisporus GN=hhfA PE=3 SV=2	GO:0000788(nuclear nucleosome);GO:0003677(DNA binding);GO:0006334(nucleosome assembly)	COG2036(Core component of nucleosome. Nucleosomes wrap and compact DNA into chromatin, limiting DNA accessibility to the cellular machineries which require DNA as a template. Histones thereby play a central role in transcription regulation, DNA repair, DNA replication and chromosomal stability. DNA accessibility is regulated via a complex set of post-translational modifications of histones, also …	NA	NA	NA	NA(NA)	V9FDA4.1 PF15511.4;CENP-T_C;
TRINITY_DN10365_c0_g1	502	TRINITY_DN10365_c0_g1_i1	cell division control protein Cdc6 [Morchella conica CCBAS932]	-	-	-	-	-	-	-	-	-
TRINITY_DN10365_c0_g2	2449	TRINITY_DN10365_c0_g2_i1	cell division control protein Cdc6 [Morchella conica CCBAS932]	cdc18	Cell division control protein 18 OS=Schizosaccharomyces pombe (strain 972 / ATCC 24843) GN=cdc18 PE=1 SV=1	GO:0005575(cellular_component);GO:0008150(biological_process)	COG1474(Involved in regulation of DNA replication (By similarity))	K02213	cell division control protein 6	-	psco04111(Cell cycle - yeast);psco04113(Meiosis - yeast)	A0A0A1TCV8.1 PF13191.4;AAA_16;
TRINITY_DN10367_c0_g1	910	TRINITY_DN10367_c0_g1_i1;TRINITY_DN10367_c0_g1_i2;TRINITY_DN10367_c0_g1_i3;TRINITY_DN10367_c0_g1_i4	-	-	-	-	-	-	-	-	-	-
TRINITY_DN10368_c0_g2	765	TRINITY_DN10368_c0_g2_i1	hypothetical protein P167DRAFT_591359 [Morchella conica CCBAS932]	-	-	-	-	-	-	-	-	-
TRINITY_DN10368_c0_g3	239	TRINITY_DN10368_c0_g3_i1	-	-	-	-	-	-	-	-	-	-
TRINITY_DN10368_c0_g4	341	TRINITY_DN10368_c0_g4_i1	-	-	-	-	-	-	-	-	-	-
TRINITY_DN10368_c0_g5	279	TRINITY_DN10368_c0_g5_i1	-	-	-	-	-	-	-	-	-	-
TRINITY_DN1036_c0_g1	241	TRINITY_DN1036_c0_g1_i1	amidase signature enzyme [Morchella conica CCBAS932]	-	-	-	COG0154(Allows the formation of correctly charged Gln-tRNA(Gln) through the transamidation of misacylated Glu-tRNA(Gln) in organisms which lack glutaminyl-tRNA synthetase. The reaction takes place in the presence of glutamine and ATP through an activated gamma-phospho-Glu-tRNA(Gln) (By similarity))	-	-	-	-	-
TRINITY_DN10370_c0_g1	205	TRINITY_DN10370_c0_g1_i1	3-ketoacyl-CoA thiolase [Gonapodya prolifera JEL478]	PED1	3-ketoacyl-CoA thiolase 2, peroxisomal OS=Arabidopsis thaliana GN=PED1 PE=1 SV=2	GO:0003988(acetyl-CoA C-acyltransferase activity);GO:0005730(nucleolus);GO:0005739(mitochondrion);GO:0005774(vacuolar membrane);GO:0005777(peroxisome);GO:0005829(cytosol);GO:0006635(fatty acid beta-oxidation);GO:0009507(chloroplast);GO:0009514(glyoxysome);GO:0009611(response to wounding);GO:0009695(jasmonic acid biosynthetic process);GO:0009789(positive regulation of abscisic acid-activated signa…	COG0183(acetyl-coa acetyltransferase)	K07513	acetyl-CoA acyltransferase 1	EC:2.3.1.16	aje00071(Fatty acid degradation);aje00592(alpha-Linolenic acid metabolism);aje01040(Biosynthesis of unsaturated fatty acids);aje00280(Valine, leucine and isoleucine degradation);aje04146(Peroxisome)	A0A022QYH8.1 PF02803.16;Thiolase_C;
TRINITY_DN10370_c0_g2	316	TRINITY_DN10370_c0_g2_i1	thiolase [Serendipita vermifera 'subsp. bescii']	PED1	3-ketoacyl-CoA thiolase 2, peroxisomal OS=Arabidopsis thaliana GN=PED1 PE=1 SV=2	GO:0003988(acetyl-CoA C-acyltransferase activity);GO:0005730(nucleolus);GO:0005739(mitochondrion);GO:0005774(vacuolar membrane);GO:0005777(peroxisome);GO:0005829(cytosol);GO:0006635(fatty acid beta-oxidation);GO:0009507(chloroplast);GO:0009514(glyoxysome);GO:0009611(response to wounding);GO:0009695(jasmonic acid biosynthetic process);GO:0009789(positive regulation of abscisic acid-activated signa…	COG0183(acetyl-coa acetyltransferase)	K07513	acetyl-CoA acyltransferase 1	EC:2.3.1.16	psq00071(Fatty acid degradation);psq00592(alpha-Linolenic acid metabolism);psq01040(Biosynthesis of unsaturated fatty acids);psq00280(Valine, leucine and isoleucine degradation);psq04146(Peroxisome)	V7BHN0.1 PF00108.21;Thiolase_N;
TRINITY_DN10371_c0_g1	287	TRINITY_DN10371_c0_g1_i1	-	VTC5	GDP-L-galactose phosphorylase 2 OS=Arabidopsis thaliana GN=VTC5 PE=1 SV=1	GO:0005737(cytoplasm);GO:0006006(glucose metabolic process);GO:0080048(GDP-D-glucose phosphorylase activity)	ENOG4111FR6(GDP-D-glucose phosphorylase)	-	-	-	-	-
TRINITY_DN10374_c0_g1	530	TRINITY_DN10374_c0_g1_i1	-	-	-	-	-	-	-	-	-	-
TRINITY_DN10375_c0_g1	280	TRINITY_DN10375_c0_g1_i1	hypothetical protein P167DRAFT_609675 [Morchella conica CCBAS932]	-	-	-	-	-	-	-	-	-
TRINITY_DN10375_c0_g2	1312	TRINITY_DN10375_c0_g2_i1	hypothetical protein P167DRAFT_609675 [Morchella conica CCBAS932]	-	-	-	-	-	-	-	-	-
TRINITY_DN10376_c0_g1	218	TRINITY_DN10376_c0_g1_i1	-	-	-	-	-	-	-	-	-	-
TRINITY_DN10376_c0_g2	402	TRINITY_DN10376_c0_g2_i1	-	-	-	GO:0005737(cytoplasm);GO:0006457(protein folding)	COG0484(ATP binding to DnaK triggers the release of the substrate protein, thus completing the reaction cycle. Several rounds of ATP-dependent interactions between DnaJ, DnaK and GrpE are required for fully efficient folding. Also involved, together with DnaK and GrpE, in the DNA replication of plasmids through activation of initiation proteins (By similarity))	-	-	-	-	-
TRINITY_DN10377_c0_g1	570	TRINITY_DN10377_c0_g1_i1;TRINITY_DN10377_c0_g1_i2	-	-	-	-	-	-	-	-	-	-
TRINITY_DN10378_c0_g1	528	TRINITY_DN10378_c0_g1_i1	-	rps21	30S ribosomal protein S21, chloroplastic (Fragment) OS=Spinacia oleracea GN=rps21 PE=1 SV=1	GO:0044391(ribosomal subunit)	ENOG410Y838(Ribosomal protein S21)	-	-	-	-	A0A061EDT6.1 PF01165.18;Ribosomal_S21;
TRINITY_DN10379_c0_g1	963	TRINITY_DN10379_c0_g1_i1	hypothetical protein P167DRAFT_543965 [Morchella conica CCBAS932]	-	-	-	ENOG410ZF3V(NA)	-	-	-	-	-
TRINITY_DN10380_c0_g1	2277	TRINITY_DN10380_c0_g1_i1	ARM repeat-containing protein [Morchella conica CCBAS932]	mcp2	Meiotic coiled-coil protein 2 OS=Schizosaccharomyces pombe (strain 972 / ATCC 24843) GN=mcp2 PE=3 SV=1	GO:0003723(RNA binding);GO:0005575(cellular_component);GO:0008150(biological_process)	COG5099(pumilio homolog)	-	-	-	-	F9X2T9.1 PF00806.17;PUF;
TRINITY_DN10380_c0_g2	3105	TRINITY_DN10380_c0_g2_i1;TRINITY_DN10380_c0_g2_i2	hypothetical protein P167DRAFT_482398 [Morchella conica CCBAS932]	ARB_06907	Uncharacterized secreted protein ARB_06907 OS=Arthroderma benhamiae (strain ATCC MYA-4681 / CBS 112371) GN=ARB_06907 PE=1 SV=2	GO:0003674(molecular_function);GO:0005575(cellular_component);GO:0006508(proteolysis);GO:0008150(biological_process);GO:0008236(serine-type peptidase activity)	ENOG4111HRV(NA)	-	-	-	-	U4L8K4.1 PF00326.19;Peptidase_S9;
TRINITY_DN10381_c0_g1	1526	TRINITY_DN10381_c0_g1_i1;TRINITY_DN10381_c0_g1_i2	hypothetical protein P167DRAFT_522197 [Morchella conica CCBAS932]	SPAC1D4.02c	Uncharacterized protein C1D4.02c OS=Schizosaccharomyces pombe (strain 972 / ATCC 24843) GN=SPAC1D4.02c PE=4 SV=2	GO:0005575(cellular_component);GO:0008150(biological_process)	COG5233(Golgi reassembly stacking protein)	-	-	-	-	D5GF76.1 PF04495.12;GRASP55_65;
TRINITY_DN10382_c0_g1	273	TRINITY_DN10382_c0_g1_i1	hypothetical protein P167DRAFT_15945 [Morchella conica CCBAS932]	-	-	-	-	-	-	-	-	-
TRINITY_DN10384_c0_g1	290	TRINITY_DN10384_c0_g1_i1	-	-	-	-	-	-	-	-	-	-
TRINITY_DN10384_c1_g1	330	TRINITY_DN10384_c1_g1_i1	-	-	-	-	-	-	-	-	-	-
TRINITY_DN10385_c0_g1	1053	TRINITY_DN10385_c0_g1_i1;TRINITY_DN10385_c0_g1_i2	hypothetical protein P167DRAFT_239768 [Morchella conica CCBAS932]	-	-	-	-	-	-	-	-	-
TRINITY_DN10385_c0_g2	854	TRINITY_DN10385_c0_g2_i1;TRINITY_DN10385_c0_g2_i2	-	-	-	-	-	-	-	-	-	-
TRINITY_DN10386_c0_g1	246	TRINITY_DN10386_c0_g1_i1	glutathione S-transferase, putative [Aspergillus fischeri NRRL 181]	GSTO1	Glutathione S-transferase omega-1 OS=Homo sapiens GN=GSTO1 PE=1 SV=2	GO:0004364(glutathione transferase activity);GO:0005515(protein binding);GO:0005604(basement membrane);GO:0005737(cytoplasm);GO:0005829(cytosol);GO:0006749(glutathione metabolic process);GO:0010880(regulation of release of sequestered calcium ion into cytosol by sarcoplasmic reticulum);GO:0010881(regulation of cardiac muscle contraction by regulation of the release of sequestered calcium ion);GO:…	ENOG410XSIX(glutathione Stransferase)	K00799	glutathione S-transferase	EC:2.5.1.18	nfi00480(Glutathione metabolism)	F7ITE8.1 PF13417.4;GST_N_3;
TRINITY_DN10386_c0_g2	213	TRINITY_DN10386_c0_g2_i1	-	GSTO1	Glutathione S-transferase omega-1 OS=Homo sapiens GN=GSTO1 PE=1 SV=2	GO:0004364(glutathione transferase activity);GO:0005515(protein binding);GO:0005604(basement membrane);GO:0005737(cytoplasm);GO:0005829(cytosol);GO:0006749(glutathione metabolic process);GO:0010880(regulation of release of sequestered calcium ion into cytosol by sarcoplasmic reticulum);GO:0010881(regulation of cardiac muscle contraction by regulation of the release of sequestered calcium ion);GO:…	ENOG410XSIX(glutathione Stransferase)	-	-	-	-	G3QQT9.1 PF14497.4;GST_C_3;
TRINITY_DN10386_c0_g3	1055	TRINITY_DN10386_c0_g3_i1	hypothetical protein W97_06077 [Coniosporium apollinis CBS 100218]	Gsto1	Glutathione S-transferase omega-1 OS=Mus musculus GN=Gsto1 PE=1 SV=2	GO:0004364(glutathione transferase activity);GO:0005604(basement membrane);GO:0005737(cytoplasm);GO:0005829(cytosol);GO:0006749(glutathione metabolic process);GO:0008152(metabolic process);GO:0009407(toxin catabolic process);GO:0010880(regulation of release of sequestered calcium ion into cytosol by sarcoplasmic reticulum);GO:0016491(oxidoreductase activity);GO:0016740(transferase activity);GO:00…	ENOG410XSIX(glutathione Stransferase)	K00799	glutathione S-transferase	EC:2.5.1.18	psq00480(Glutathione metabolism)	O09131.2 PF00043.23;GST_C;
TRINITY_DN10388_c0_g1	206	TRINITY_DN10388_c0_g1_i1	-	-	-	-	-	-	-	-	-	-
TRINITY_DN10388_c0_g2	1342	TRINITY_DN10388_c0_g2_i1	hypothetical protein P167DRAFT_574113 [Morchella conica CCBAS932]	-	-	-	-	-	-	-	-	-
TRINITY_DN10389_c0_g1	455	TRINITY_DN10389_c0_g1_i1	heparinase ii iii family protein [Lentinula edodes]	-	-	-	ENOG410XPJG(heparinase II III family protein)	-	-	-	-	V2XZT5.1 PF07940.11;Hepar_II_III;
TRINITY_DN1038_c0_g1	1358	TRINITY_DN1038_c0_g1_i1	-	-	-	-	-	-	-	-	-	-
TRINITY_DN10390_c0_g1	226	TRINITY_DN10390_c0_g1_i1	-	AFB2	Protein AUXIN SIGNALING F-BOX 2 OS=Arabidopsis thaliana GN=AFB2 PE=1 SV=1	GO:0004842(ubiquitin-protein transferase activity);GO:0005515(protein binding);GO:0005634(nucleus);GO:0005774(vacuolar membrane);GO:0006952(defense response);GO:0009734(auxin-activated signaling pathway);GO:0010011(auxin binding);GO:0010152(pollen maturation);GO:0016567(protein ubiquitination);GO:0048443(stamen development)	ENOG410XQ54(F-box and leucine-rich repeat protein)	-	-	-	-	-
TRINITY_DN10390_c0_g2	552	TRINITY_DN10390_c0_g2_i1	-	AFB3	Protein AUXIN SIGNALING F-BOX 3 OS=Arabidopsis thaliana GN=AFB3 PE=1 SV=1	GO:0000822(inositol hexakisphosphate binding);GO:0009734(auxin-activated signaling pathway)	ENOG410XQ54(F-box and leucine-rich repeat protein)	-	-	-	-	-
TRINITY_DN10391_c0_g1	481	TRINITY_DN10391_c0_g1_i1	-	-	-	-	-	-	-	-	-	-
TRINITY_DN10392_c0_g1	549	TRINITY_DN10392_c0_g1_i1	AGC/RSK protein kinase [Spizellomyces punctatus DAOM BR117]	PHOT1A	Phototropin-1A OS=Oryza sativa subsp. japonica GN=PHOT1A PE=1 SV=2	GO:0004674(protein serine/threonine kinase activity);GO:0005634(nucleus);GO:0005737(cytoplasm);GO:0005886(plasma membrane);GO:0035556(intracellular signal transduction)	COG2202(Histidine kinase)	NA	NA	NA	NA(NA)	A0A0A0KG03.1 PF00069.23;Pkinase;
TRINITY_DN10394_c0_g1	2004	TRINITY_DN10394_c0_g1_i1;TRINITY_DN10394_c0_g1_i2;TRINITY_DN10394_c0_g1_i3;TRINITY_DN10394_c0_g1_i4	hypothetical protein P167DRAFT_526783 [Morchella conica CCBAS932]	mus-11	DNA repair and recombination protein mus-11 OS=Neurospora crassa (strain ATCC 24698 / 74-OR23-1A / CBS 708.71 / DSM 1257 / FGSC 987) GN=mus-11 PE=3 SV=1	GO:0000722(telomere maintenance via recombination);GO:0000724(double-strand break repair via homologous recombination);GO:0000730(DNA recombinase assembly);GO:0003690(double-stranded DNA binding);GO:0003697(single-stranded DNA binding);GO:0005634(nucleus);GO:0007533(mating type switching);GO:0010947(negative regulation of meiotic joint molecule formation);GO:0030437(ascospore formation);GO:003586…	COG5055(DnA repair)	K10873	DNA repair and recombination protein RAD52	-	tml03440(Homologous recombination)	U4KYC9.1 PF04098.13;Rad52_Rad22;
TRINITY_DN10395_c0_g1	2216	TRINITY_DN10395_c0_g1_i1;TRINITY_DN10395_c0_g1_i2;TRINITY_DN10395_c0_g1_i3	hypothetical protein P167DRAFT_495186 [Morchella conica CCBAS932]	-	-	-	-	-	-	-	-	D5G495.1 PF12937.5;F-box-like;
TRINITY_DN10395_c0_g2	271	TRINITY_DN10395_c0_g2_i1	-	-	-	-	-	-	-	-	-	-
TRINITY_DN10396_c0_g1	1885	TRINITY_DN10396_c0_g1_i1	hypothetical protein P167DRAFT_479294 [Morchella conica CCBAS932]	-	-	GO:0003674(molecular_function);GO:0005575(cellular_component);GO:0008150(biological_process)	-	-	-	-	-	-
TRINITY_DN10396_c0_g2	549	TRINITY_DN10396_c0_g2_i1	-	-	-	-	-	-	-	-	-	-
TRINITY_DN10396_c0_g3	207	TRINITY_DN10396_c0_g3_i1	-	-	-	-	-	-	-	-	-	-
TRINITY_DN10396_c0_g4	212	TRINITY_DN10396_c0_g4_i1	-	-	-	-	-	-	-	-	-	-
TRINITY_DN10398_c0_g1	282	TRINITY_DN10398_c0_g1_i1	-	Fcer1g	High affinity immunoglobulin epsilon receptor subunit gamma OS=Mus musculus GN=Fcer1g PE=1 SV=1	GO:0001798(positive regulation of type IIa hypersensitivity);GO:0001805(positive regulation of type III hypersensitivity);GO:0001812(positive regulation of type I hypersensitivity);GO:0002283(neutrophil activation involved in immune response);GO:0002292(T cell differentiation involved in immune response);GO:0002431(Fc receptor mediated stimulatory signaling pathway);GO:0002554(serotonin secretion…	ENOG410Z3W0(Fc fragment of IgE, high affinity I, receptor for)	-	-	-	-	P30273.1 PF11628.6;TCR_zetazeta;
TRINITY_DN10399_c0_g1	273	TRINITY_DN10399_c0_g1_i1	-	-	-	-	-	-	-	-	-	-
TRINITY_DN10399_c0_g2	402	TRINITY_DN10399_c0_g2_i1	-	-	-	-	-	-	-	-	-	-
TRINITY_DN10399_c1_g1	450	TRINITY_DN10399_c1_g1_i1	-	-	-	-	-	-	-	-	-	-
TRINITY_DN1039_c0_g1	2198	TRINITY_DN1039_c0_g1_i1	hypothetical protein P167DRAFT_560357 [Morchella conica CCBAS932]	ECM14	Putative metallocarboxypeptidase ECM14 OS=Coccidioides posadasii (strain C735) GN=ECM14 PE=3 SV=1	GO:0004181(metallocarboxypeptidase activity);GO:0005615(extracellular space)	COG2866(metallocarboxypeptidase activity)	NA	NA	NA	NA(NA)	D5GLI0.1 PF00246.22;Peptidase_M14;
TRINITY_DN103_c0_g1	1174	TRINITY_DN103_c0_g1_i1	FAS1 domain-containing protein [Morchella conica CCBAS932]	-	-	GO:0000329(fungal-type vacuole membrane);GO:0005615(extracellular space);GO:0016236(macroautophagy)	COG2335(Beta-Ig-H3 fasciclin)	-	-	-	-	W2RTD2.1 PF02469.20;Fasciclin;
TRINITY_DN10400_c0_g1	1418	TRINITY_DN10400_c0_g1_i1	ATP synthase F1 gamma [Morchella conica CCBAS932]	ATP3	ATP synthase subunit gamma, mitochondrial OS=Kluyveromyces lactis (strain ATCC 8585 / CBS 2359 / DSM 70799 / NBRC 1267 / NRRL Y-1140 / WM37) GN=ATP3 PE=1 SV=1	GO:0005756(mitochondrial proton-transporting ATP synthase, central stalk);GO:0005886(plasma membrane);GO:0015986(ATP synthesis coupled proton transport);GO:0016887(ATPase activity);GO:0046933(proton-transporting ATP synthase activity, rotational mechanism);GO:0046961(proton-transporting ATPase activity, rotational mechanism)	COG0224(Produces ATP from ADP in the presence of a proton gradient across the membrane. The gamma chain is believed to be important in regulating ATPase activity and the flow of protons through the CF(0) complex (By similarity))	K02136	F-type H+-transporting ATPase subunit gamma	-	tml00190(Oxidative phosphorylation)	D5GIC4.1 PF00231.17;ATP-synt;
TRINITY_DN10400_c0_g2	1441	TRINITY_DN10400_c0_g2_i1;TRINITY_DN10400_c0_g2_i2	60S ribosomal protein L7 [Morchella conica CCBAS932]	rpl-7	60S ribosomal protein L7 OS=Neurospora crassa (strain ATCC 24698 / 74-OR23-1A / CBS 708.71 / DSM 1257 / FGSC 987) GN=rpl-7 PE=3 SV=2	NA(NA)	COG1841(ribosomal large subunit biogenesis)	K02937	large subunit ribosomal protein L7e	-	tml03010(Ribosome)	F4P3P8.1 PF00327.18;Ribosomal_L30;
TRINITY_DN10400_c0_g3	507	TRINITY_DN10400_c0_g3_i1	ATP synthase F1 gamma [Lentinula edodes]	ATP3	ATP synthase subunit gamma, mitochondrial OS=Kluyveromyces lactis (strain ATCC 8585 / CBS 2359 / DSM 70799 / NBRC 1267 / NRRL Y-1140 / WM37) GN=ATP3 PE=1 SV=1	GO:0005756(mitochondrial proton-transporting ATP synthase, central stalk);GO:0005886(plasma membrane);GO:0015986(ATP synthesis coupled proton transport);GO:0016887(ATPase activity);GO:0046933(proton-transporting ATP synthase activity, rotational mechanism);GO:0046961(proton-transporting ATPase activity, rotational mechanism)	COG0224(Produces ATP from ADP in the presence of a proton gradient across the membrane. The gamma chain is believed to be important in regulating ATPase activity and the flow of protons through the CF(0) complex (By similarity))	K02136	F-type H+-transporting ATPase subunit gamma	-	mrr00190(Oxidative phosphorylation)	V2X333.1 PF00231.17;ATP-synt;
TRINITY_DN10400_c0_g4	302	TRINITY_DN10400_c0_g4_i1	ATP synthase F1 gamma [Lentinula edodes]	atp3	ATP synthase subunit gamma, mitochondrial OS=Schizosaccharomyces pombe (strain 972 / ATCC 24843) GN=atp3 PE=3 SV=1	GO:0005756(mitochondrial proton-transporting ATP synthase, central stalk);GO:0005886(plasma membrane);GO:0015986(ATP synthesis coupled proton transport);GO:0016887(ATPase activity);GO:0046933(proton-transporting ATP synthase activity, rotational mechanism);GO:0046961(proton-transporting ATPase activity, rotational mechanism)	COG0224(Produces ATP from ADP in the presence of a proton gradient across the membrane. The gamma chain is believed to be important in regulating ATPase activity and the flow of protons through the CF(0) complex (By similarity))	K02136	F-type H+-transporting ATPase subunit gamma	-	scm00190(Oxidative phosphorylation)	D8PZ81.1 PF00231.17;ATP-synt;
[truncated: 22,529 more rows]

## Sheet: Table S7
Table S7. All DEGs in red-stipe symptom.
[truncated: 4,265 more rows]

## Sheet: Table S8 
Table S8 GO annotation of DEGs
GO_ID	GO_Term	GO_Function	GO_Level	S gene number	TS gene number	B gene number	TB gene number	pvalue
[truncated: 151 more rows]

## Sheet: Table S9
Table S9. GO enrichment of DEGs
[truncated: 10,695 more rows]

## Sheet: Table S10
Table S10. KEGG annotation of DEGs
[truncated: 1,418 more rows]

[truncated: 9 more sheets: Table S 11, Table S12, Table S13, Table S14, Table S15, Table S16, Table S17, Table S18, Table S19]
