# Supplementary figures and images for: Transcriptomic and Metabolomic Profiles Provide Insights into the Red-Stipe Symptom of Morel Fruiting Bodies
Source: MDPI journal article supplement (doi:10.3390/jof9030373), 2023-03-18

# Species Distribution

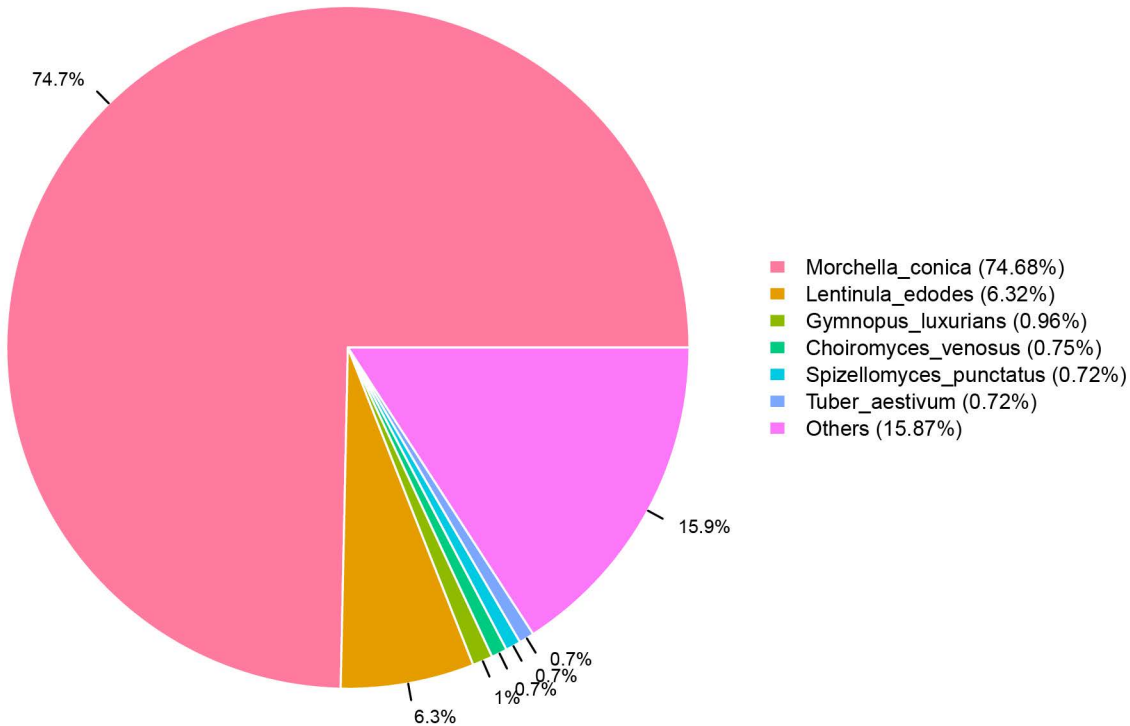

Supplement: s1 [file s1]
